# Supplementary material for: The natural product co-evolved pyrroloquinoline quinone gene enhances their production when heterologously expressed in a variety of Streptomycetes
Source: Research Square preprint supplement (doi:10.21203/rs.3.rs-2734079/v1), 2023-04-04
Supplement: Supplementary file 1 [file 0dbbb5c3a374179481749dce.xlsx]

## Sheet: FcC_info
Partition	Start-End	Annotation	Model
1	1-228	Glycine oxidase ThiO (EC 1.4.3.19)	cpREVF
2	229-264	Cys-tRNA(Pro) deacylase YbaK	WAG
3	265-863	NADH-ubiquinone oxidoreductase chain L (EC 1.6.5.3)	LGF
4	864-966	LSU ribosomal protein L24p (L26e)	LG
5	967-1059	DNA-binding protein HU	LG
6	1060-1154	putative electron transport protein	JTTDCMut
7	1155-1218	FIG00761799: membrane protein	mtZOA
8	1219-1259	FIG01050400: hypothetical protein	Dayhoff
9	1260-1691	Acetolactate synthase large subunit (EC 2.2.1.6)	LG
10	1692-1749	Molybdenum cofactor biosynthesis protein MoaD	WAG
11	1750-2044	putative two-component system sensor kinase	LGF
12	2045-2259	GTP-binding protein TypA/BipA	LG
13	2260-2343	Heat shock protein 60 family co-chaperone GroES	LG
14	2344-2766	2-isopropylmalate synthase (EC 2.3.3.13)	VTF
15	2767-3099	Peptide chain release factor 2	LG
16	3100-3254	GTP-binding protein Era	VT
17	3255-3540	Aminopeptidase YpdF (MP-, MA-, MS-, AP-, NP- specific)	LGF
18	3541-3811	Epoxide hydrolase (EC 3.3.2.9)	LGF
19	3812-4347	DNA or RNA helicases of superfamily II	LGF
20	4348-4606	Protein-export membrane protein SecD (TC 3.A.5.1.1)	LG
21	4607-4683	FIG01121472: hypothetical protein	mtZOA
22	4684-4764	SSU ribosomal protein S17p (S11e)	LG
23	4765-5124	Phosphoenolpyruvate carboxykinase [GTP] (EC 4.1.1.32)	LG
24	5125-5200	Transcriptional regulator, AsnC family	LG
25	5201-5280	Phosphoribosyl-ATP pyrophosphatase (EC 3.6.1.31)	JTT
26	5281-5313	FIG021764: Possible membrane protein	PMB
27	5314-5399	DNA-directed RNA polymerase omega subunit (EC 2.7.7.6)	JTT
28	5400-6003	3-methylmercaptopropionyl-CoA dehydrogenase (DmdC)	LGF
29	6004-6504	Glucosamine--fructose-6-phosphate aminotransferase [isomerizing] (EC 2.6.1.16)	LGF
30	6505-6564	SSU ribosomal protein S18p @ SSU ribosomal protein S18p, zinc-independent	JTTDCMut
31	6565-6639	SSU ribosomal protein S19p (S15e)	LG
32	6640-6703	LSU ribosomal protein L35p	LG
33	6704-6892	PROBABLE CONSERVED TRANSMEMBRANE PROTEIN	cpREVF
34	6893-6929	ATP synthase F0 sector subunit c	LGF
35	6930-7001	Preprotein translocase subunit SecG (TC 3.A.5.1.1)	mtZOAF
36	7002-7444	Hydroxymethylpyrimidine phosphate synthase ThiC (EC 4.1.99.17)	LG
37	7445-8546	Glutamate synthase [NADPH] large chain (EC 1.4.1.13)	LGF
38	8547-8866	Phosphoribosylaminoimidazole carboxylase ATPase subunit (EC 4.1.1.21)	LGF
39	8867-9433	Bacterial proteasome-activating AAA-ATPase (PAN)	LG
40	9434-9513	Acyl carrier protein	WAG
41	9514-9574	LSU ribosomal protein L27p	Dayhoff
42	9575-10029	Signal recognition particle, subunit Ffh SRP54 (TC 3.A.5.1.1)	LGF
43	10030-10140	Aldehyde dehydrogenase (EC 1.2.1.3)	LGF
44	10141-10499	Nicotinate phosphoribosyltransferase (EC 2.4.2.11)	LGF
45	10500-10565	LSU ribosomal protein L29p (L35e)	Dayhoff
46	10566-10834	FIG021250: possible hydrolase	LGF
47	10835-11212	putative integral membrane efflux protein	LGF
48	11213-11626	NADP-dependent malic enzyme (EC 1.1.1.40)	WAG
49	11627-11908	UDP-N-acetylenolpyruvoylglucosamine reductase (EC 1.1.1.158)	WAGF
50	11909-11929	Phosphosugar mutase of unknown sugar (see annotation)	JTT
51	11930-12068	tRNA-specific 2-thiouridylase MnmA	LG
52	12069-12255	sensor kinase protein	LGF
53	12256-12321	Glutamyl-tRNA reductase (EC 1.2.1.70)	DayhoffF
54	12322-12714	Glycolate dehydrogenase (EC 1.1.99.14), subunit GlcD	LGF
55	12715-12833	Methionine ABC transporter ATP-binding protein	LG
56	12834-12923	DNA-binding response regulator, LuxR family	VTF
57	12924-13355	Serine phosphatase RsbU, regulator of sigma subunit	LGF
58	13356-13734	Phosphoglycerate kinase (EC 2.7.2.3)	WAGF
59	13735-13821	sporulation associated protein	LG
60	13822-13860	Alkaline phosphodiesterase I (EC 3.1.4.1) / Nucleotide pyrophosphatase (EC 3.6.1.9)	LG
61	13861-14320	Glucose-6-phosphate 1-dehydrogenase (EC 1.1.1.49)	LG
62	14321-14479	1-acyl-sn-glycerol-3-phosphate acyltransferase (EC 2.3.1.51)	JTTDCMut
63	14480-14547	Uncharacterized protein, similar to the N-terminal domain of Lon protease	VTF
64	14548-14666	CTP synthase (EC 6.3.4.2)	LG
65	14667-15140	Inosine-5'-monophosphate dehydrogenase (EC 1.1.1.205)	LGF
66	15141-15351	Dihydrolipoamide acyltransferase component of branched-chain alpha-keto acid dehydrogenase complex (EC 2.3.1.168)	LG
67	15352-15525	Cys-tRNA(Pro) deacylase YbaK	JTTDCMut
68	15526-15717	Protein serine/threonine phosphatase PrpC, regulation of stationary phase	LGF
69	15718-16073	Cell division protein FtsW	mtInvF
70	16074-16593	Urocanate hydratase (EC 4.2.1.49)	LGF
71	16594-16649	LSU ribosomal protein L30p (L7e)	LG
72	16650-16825	Deoxyribose-phosphate aldolase (EC 4.1.2.4)	LG
73	16826-17129	FIG003033: Helicase domain protein	LG
74	17130-17569	Carbamoyl-phosphate synthase large chain (EC 6.3.5.5)	LGF
75	17570-17702	GMP synthase [glutamine-hydrolyzing] (EC 6.3.5.2)	WAG
76	17703-18114	NADH-ubiquinone oxidoreductase chain M (EC 1.6.5.3)	LGF
77	18115-18492	putative ATP/GTP-binding protein	JTTDCMut
78	18493-18572	Phosphopantothenoylcysteine decarboxylase (EC 4.1.1.36) / Phosphopantothenoylcysteine synthetase (EC 6.3.2.5)	JTTDCMut
79	18573-18679	Ribosomal large subunit pseudouridine synthase B (EC 4.2.1.70)	LG
80	18680-19184	Ferredoxin--sulfite reductase, actinobacterial type (EC 1.8.7.1)	LGF
81	19185-19584	Enolase (EC 4.2.1.11)	VTF
82	19585-19731	putative fatty acid:CoA ligase	LGF
83	19732-20145	Cysteinyl-tRNA synthetase (EC 6.1.1.16)	LGF
84	20146-20505	Delta-1-pyrroline-5-carboxylate dehydrogenase (EC 1.5.1.12)	LGF
85	20506-20867	FIG01120800: hypothetical protein	LGF
86	20868-21133	D-3-phosphoglycerate dehydrogenase (EC 1.1.1.95)	LGF
87	21134-21219	tRNA dihydrouridine synthase B (EC 1.-.-.-)	Dayhoff
88	21220-21480	NADH-ubiquinone oxidoreductase chain F (EC 1.6.5.3)	LG
89	21481-21724	Ribosomal protein S12p Asp88 (E. coli) methylthiotransferase	LGF
90	21725-21826	Phosphoserine phosphatase (EC 3.1.3.3)	LG
91	21827-22061	electron transfer oxidoreductase	rtREVF
92	22062-22193	Shikimate kinase I (EC 2.7.1.71) / 3-dehydroquinate synthase (EC 4.2.3.4)	JTTDCMut
93	22194-22589	Amidophosphoribosyltransferase (EC 2.4.2.14)	LG
94	22590-22828	FIG01131824: hypothetical protein	LGF
95	22829-23078	Exopolyphosphatase (EC 3.6.1.11)	WAGF
96	23079-23088	Protoporphyrinogen IX oxidase, aerobic, HemY (EC 1.3.3.4)	JTTDCMut
97	23089-23342	Transcription regulator [contains diacylglycerol kinase catalytic domain]	LGF
98	23343-23739	3-polyprenyl-4-hydroxybenzoate carboxy-lyase (EC 4.1.1.-)	LG
99	23740-23879	Coenzyme F420-0:L-glutamate ligase @ Coenzyme F420-1:L-glutamate ligase / domain of unknown function	JTTF
100	23880-24253	NADH dehydrogenase (EC 1.6.99.3)	VTF
101	24254-24778	ABC transporter ATP-binding protein	LGF
102	24779-25190	ATPase, AAA family	LGF
103	25191-25333	UDP-N-acetylmuramoylalanyl-D-glutamyl-2,6-diaminopimelate--D-alanyl-D-alanine ligase (EC 6.3.2.10)	JTT
104	25334-25690	Aspartyl-tRNA(Asn) amidotransferase subunit A (EC 6.3.5.6) @ Glutamyl-tRNA(Gln) amidotransferase subunit A (EC 6.3.5.7)	WAGF
105	25691-26114	Dihydrofolate synthase (EC 6.3.2.12) / Folylpolyglutamate synthase (EC 6.3.2.17)	LGF
106	26115-26151	LSU ribosomal protein L36p	JTTDCMut
107	26152-26270	Integral membrane protein TerC	LG
108	26271-26699	UDP-N-acetylmuramate--alanine ligase (EC 6.3.2.8)	WAGF
109	26700-26865	putative cytochrome P450 hydroxylase	LGF
110	26866-27309	aldehyde dehydrogenase family protein	LGF
111	27310-27548	Xanthine/uracil/thiamine/ascorbate permease family protein	LG
112	27549-27938	Glutamate-1-semialdehyde aminotransferase (EC 5.4.3.8)	WAGF
113	27939-27973	Aldehyde dehydrogenase (EC 1.2.1.3)	Dayhoff
114	27974-28218	UDP-N-acetylmuramoylalanine--D-glutamate ligase (EC 6.3.2.9)	WAGF
115	28219-28580	3-isopropylmalate dehydratase large subunit (EC 4.2.1.33)	LGF
116	28581-28815	tRNA nucleotidyltransferase (EC 2.7.7.21) (EC 2.7.7.25)	JTTDCMutF
117	28816-29155	Pyruvate dehydrogenase E1 component alpha subunit (EC 1.2.4.1)	LGF
118	29156-29473	Acetoacetyl-CoA synthetase (EC 6.2.1.16)	LGF
119	29474-29861	Tryptophan synthase beta chain (EC 4.2.1.20)	LGF
120	29862-30294	GTP-binding protein EngA	LG
121	30295-30382	putative alkanal monooxygenase (luciferase)	LGF
122	30383-30566	Oligopeptide transport ATP-binding protein OppF (TC 3.A.1.5.1)	LGF
123	30567-30815	SSU ribosomal protein S2p (SAe)	LG
124	30816-30927	RNA polymerase sigma factor SigB	JTT
125	30928-31162	N-formylglutamate deformylase (EC 3.5.1.68) [alternative form]	LGF
126	31163-31494	putative two-component system sensor kinase	LGF
127	31495-31638	FIG01122858: hypothetical protein	JTTDCMut
128	31639-32031	FIG016551: Putative peptidase	LGF
129	32032-32222	Glycosyltransferase MshA involved in mycothiol biosynthesis (EC 2.4.1.-)	LGF
130	32223-32616	putative aminopeptidase	LGF
131	32617-33041	Pup ligase PafA' paralog, possible component of postulated heterodimer PafA-PafA'	LG
132	33042-33538	DNA-directed RNA polymerase beta' subunit (EC 2.7.7.6)	LG
133	33539-33857	Dihydrolipoamide dehydrogenase of branched-chain alpha-keto acid dehydrogenase (EC 1.8.1.4)	LG
134	33858-34248	zinc protease	LGF
135	34249-34479	NADH-ubiquinone oxidoreductase chain D (EC 1.6.5.3)	LG
136	34480-34925	Fumarate hydratase class II (EC 4.2.1.2)	LGF
137	34926-35154	Sensor protein cutS (EC 2.7.13.3)	LGF
138	35155-35454	Porphobilinogen synthase (EC 4.2.1.24)	LGF
139	35455-35780	Undecaprenyl-phosphate N-acetylglucosaminyl 1-phosphate transferase (EC 2.7.8.-)	LG
140	35781-35992	Thymidine phosphorylase (EC 2.4.2.4)	LGF
141	35993-36003	Tryptophanyl-tRNA synthetase (EC 6.1.1.2)	Dayhoff
142	36004-36019	Glutamine synthetase type I (EC 6.3.1.2)	LG
143	36020-36235	Formiminoglutamic iminohydrolase (EC 3.5.3.13)	WAGF
144	36236-36590	Cystathionine gamma-lyase (EC 4.4.1.1)	LGF
145	36591-36974	Argininosuccinate lyase (EC 4.3.2.1)	LGF
146	36975-37021	Pantothenate kinase (EC 2.7.1.33)	LG
147	37022-37437	Predicted ATPase related to phosphate starvation-inducible protein PhoH	LG
148	37438-37486	DNA-directed RNA polymerase alpha subunit (EC 2.7.7.6)	JTT
149	37487-37924	Pyruvate kinase (EC 2.7.1.40)	LGF
150	37925-38064	DNA polymerase III beta subunit (EC 2.7.7.7)	WAG
151	38065-38184	Cytochrome c-type biogenesis protein CcdA (DsbD analog)	cpREVF
152	38185-38440	Aminomethyltransferase (glycine cleavage system T protein) (EC 2.1.2.10)	WAGF
153	38441-38816	Histidinol dehydrogenase (EC 1.1.1.23)	LGF
154	38817-38976	5-Enolpyruvylshikimate-3-phosphate synthase (EC 2.5.1.19)	LG
155	38977-39347	S-adenosylmethionine synthetase (EC 2.5.1.6)	LGF
156	39348-39750	Homoserine dehydrogenase (EC 1.1.1.3)	LGF
157	39751-40207	ATP synthase beta chain (EC 3.6.3.14)	LG
158	40208-40535	Osmosensitive K+ channel histidine kinase KdpD (EC 2.7.3.-)	LGF
159	40536-40943	Cell division trigger factor (EC 5.2.1.8)	LGF
160	40944-41408	Iron-sulfur cluster assembly protein SufB	LG
161	41409-41701	3,4-dihydroxy-2-butanone 4-phosphate synthase (EC 4.1.99.12) / GTP cyclohydrolase II (EC 3.5.4.25)	LGF
162	41702-42125	Phosphoglucosamine mutase (EC 5.4.2.10)	LGF
163	42126-42400	putative proteinase	LGF
164	42401-42998	DNA polymerase III alpha subunit (EC 2.7.7.7)	LGF
165	42999-43176	ATP-dependent Clp protease proteolytic subunit (EC 3.4.21.92)	LG
166	43177-43579	Glycyl-tRNA synthetase (EC 6.1.1.14)	LG
167	43580-43713	Galactose-1-phosphate uridylyltransferase (EC 2.7.7.10)	JTTF
168	43714-44004	6-phosphofructokinase (EC 2.7.1.11)	WAGF
169	44005-44590	7,8-didemethyl-8-hydroxy-5-deazariboflavin synthase subunit 1 / 7,8-didemethyl-8-hydroxy-5-deazariboflavin synthase subunit 2	LGF
170	44591-45198	Cell division protein FtsI [Peptidoglycan synthetase] (EC 2.4.1.129)	LG
171	45199-45664	Glutamine synthetase type I (EC 6.3.1.2)	LG
172	45665-45988	FIG01122515: hypothetical protein	JTT
173	45989-46398	Preprotein translocase secY subunit (TC 3.A.5.1.1)	LGF
174	46399-46736	N-acyl-L-amino acid amidohydrolase	LGF
175	46737-47112	Isovaleryl-CoA dehydrogenase (EC 1.3.8.4)	LGF
176	47113-47485	Exodeoxyribonuclease VII large subunit (EC 3.1.11.6)	LGF
177	47486-47720	Fumarylacetoacetase (EC 3.7.1.2)	LGF
178	47721-47869	ATP-dependent Clp protease ATP-binding subunit ClpX	VT
179	47870-48380	Translation elongation factor G	VTF
180	48381-48677	Gamma-aminobutyrate:alpha-ketoglutarate aminotransferase (EC 2.6.1.19)	LG
181	48678-48890	Seryl-tRNA synthetase (EC 6.1.1.11)	LGF
182	48891-48991	putative LysR-family transcriptional regulator	JTTDCMut
183	48992-49177	Ribulose-phosphate 3-epimerase (EC 5.1.3.1)	LG
184	49178-49936	Membrane alanine aminopeptidase N (EC 3.4.11.2)	WAGF
185	49937-50154	FIG00761799: membrane protein	LGF
186	50155-50317	putative LuxAB-like protein (oxygenase)	LGF
187	50318-50678	Sulfur carrier protein adenylyltransferase ThiF	LG
188	50679-50919	Chromosome (plasmid) partitioning protein ParA	LG
189	50920-50970	FIG005453: Putative DeoR-family transcriptional regulator	WAG
190	50971-51217	DNA polymerase III delta prime subunit (EC 2.7.7.7)	LGF
191	51218-51599	Pup ligase PafA, possible component of postulated heterodimer PafA-PafA'	LG
192	51600-51784	Sugar phosphate isomerases/epimerases	JTT
193	51785-52059	3-ketoacyl-CoA thiolase (EC 2.3.1.16) @ Acetyl-CoA acetyltransferase (EC 2.3.1.9)	LGF
194	52060-52323	NADH pyrophosphatase (EC 3.6.1.22)	LGF
195	52324-52545	Citrate synthase (si) (EC 2.3.3.1)	LG
196	52546-52911	Acetylornithine aminotransferase (EC 2.6.1.11)	LGF
197	52912-53605	Polyribonucleotide nucleotidyltransferase (EC 2.7.7.8)	LGF
198	53606-53655	Ferredoxin reductase	cpREVF
199	53656-53780	Two-component response regulator	VT
200	53781-54156	Quinolinate synthetase (EC 2.5.1.72)	LGF
201	54157-54524	Biotin carboxylase of acetyl-CoA carboxylase (EC 6.3.4.14) / Biotin carboxyl carrier protein of acetyl-CoA carboxylase	WAGF
202	54525-54702	FIG00761799: membrane protein	LGF
203	54703-55083	Dihydroorotase (EC 3.5.2.3)	WAGF
204	55084-55144	Imidazolonepropionase (EC 3.5.2.7)	WAG
205	55145-55192	Cold shock protein CspA	DCMut
206	55193-55505	Menaquinone via futalosine step 3	LG
207	55506-55879	putative two-component system sensor kinase	LGF
208	55880-56080	Membrane-associated zinc metalloprotease	LG
209	56081-56211	Holliday junction DNA helicase RuvA	JTT
210	56212-56263	tRNA-dependent lipid II--amino acid ligase	JTT
211	56264-56510	Potassium efflux system kefA / Small-conductance mechanosensitive channel	LGF
212	56511-56566	Aspartokinase (EC 2.7.2.4)	JTTDCMut
213	56567-56744	N-acetylmannosamine kinase (EC 2.7.1.60)	JTTDCMut
214	56745-57599	DNA-directed RNA polymerase beta subunit (EC 2.7.7.6)	LGF
215	57600-58172	Iron-sulphur-binding reductase	LG
216	58173-58504	Histidyl-tRNA synthetase (EC 6.1.1.21)	LGF
217	58505-58671	putative serine protease	LGF
218	58672-58963	Cell division protein FtsZ (EC 3.4.24.-)	LG
219	58964-59266	NAD-independent protein deacetylase AcuC	LGF
220	59267-59317	Butyryl-CoA dehydrogenase (EC 1.3.99.2)	LG
221	59318-59621	Rod shape-determining protein MreB	LGF
222	59622-59768	Methionine aminopeptidase (EC 3.4.11.18)	LGF
223	59769-59993	Chorismate synthase (EC 4.2.3.5)	LGF
224	59994-60203	Squalene--hopene cyclase (EC 5.4.99.17)	LGF
225	60204-60505	ABC-type probable sulfate transporter, periplasmic binding protein	LGF
226	60506-60696	Mrp protein homolog	LG
227	60697-60812	Succinyl-CoA ligase [ADP-forming] beta chain (EC 6.2.1.5)	WAG
228	60813-61193	3-ketoacyl-CoA thiolase (EC 2.3.1.16) @ Acetyl-CoA acetyltransferase (EC 2.3.1.9)	LGF
229	61194-61498	Ribosomal RNA large subunit methyltransferase N (EC 2.1.1.-)	JTT
230	61499-61653	ECF sigma factor	JTT
231	61654-61978	Leucine dehydrogenase (EC 1.4.1.9)	LGF
232	61979-61990	RNA polymerase principal sigma factor HrdD	JTTDCMut
233	61991-62014	putative secreted transglycosylase	WAG
234	62015-62345	4-hydroxyphenylpyruvate dioxygenase (EC 1.13.11.27)	LG
235	62346-62546	Nucleoside triphosphate pyrophosphohydrolase MazG (EC 3.6.1.8)	LGF
236	62547-62739	Chromosome (plasmid) partitioning protein ParB	JTT
237	62740-62962	Iron-sulfur cluster assembly protein SufD	LGF
238	62963-63282	Threonine synthase (EC 4.2.3.1)	LG
239	63283-63596	Holliday junction DNA helicase RuvB	LGF
240	63597-63684	2-heptaprenyl-1,4-naphthoquinone methyltransferase (EC 2.1.1.163)	JTTDCMut
241	63685-63830	D-alanine--D-alanine ligase (EC 6.3.2.4)	LGF
242	63831-64027	Aldehyde dehydrogenase (EC 1.2.1.3)	LGF
243	64028-64358	Fructose-1,6-bisphosphatase, GlpX type (EC 3.1.3.11)	LG
244	64359-64538	Chaperone protein DnaJ	JTTDCMut
245	64539-64681	Phenylalanyl-tRNA synthetase alpha chain (EC 6.1.1.20)	LGF
246	64682-64991	Heat-inducible transcription repressor HrcA	JTT
247	64992-65213	ATPase, AFG1 family	LGF
248	65214-65718	Penicillin amidase precursor (EC 3.5.1.11)	LGF
249	65719-65961	FIG00945285: putative DNA-binding protein	JTT
250	65962-66133	Transcriptional regulator, IclR family	JTTDCMut
251	66134-66793	ATP-dependent DNA helicase RecG (EC 3.6.1.-)	LGF
252	66794-67373	Transketolase (EC 2.2.1.1)	LGF
253	67374-67703	Low-specificity L-threonine aldolase (EC 4.1.2.48)	LGF
254	67704-67980	Putative stomatin/prohibitin-family membrane protease subunit YbbK	LG
255	67981-68253	N-succinyl-L,L-diaminopimelate desuccinylase (EC 3.5.1.18)	WAGF
256	68254-68374	Uroporphyrinogen III decarboxylase (EC 4.1.1.37)	JTT
257	68375-68658	Alanine dehydrogenase (EC 1.4.1.1)	LGF
258	68659-68816	Hydroxymethylpyrimidine phosphate kinase ThiD (EC 2.7.4.7)	WAGF
259	68817-69115	Biosynthetic Aromatic amino acid aminotransferase beta (EC 2.6.1.57)	LGF
260	69116-69350	Homoserine kinase (EC 2.7.1.39)	LGF
261	69351-69403	Fructose-bisphosphate aldolase class II (EC 4.1.2.13)	WAG
262	69404-69571	RecA protein	LG
263	69572-69636	Prolipoprotein diacylglyceryl transferase (EC 2.4.99.-)	mtInvF
264	69637-69793	Thiamine-monophosphate kinase (EC 2.7.4.16)	LGF
265	69794-69930	Quinone oxidoreductase (EC 1.6.5.5)	LGF
266	69931-70438	Heat shock protein 60 family chaperone GroEL	LGF
267	70439-70534	Cell division protein FtsI [Peptidoglycan synthetase] (EC 2.4.1.129)	PMB
268	70535-70753	O-antigen export system, permease protein	LGF
269	70754-71077	Anthranilate phosphoribosyltransferase (EC 2.4.2.18)	LGF
270	71078-71252	putative ATP/GTP-binding protein	LGF
271	71253-71316	Malate dehydrogenase (EC 1.1.1.37)	LG
272	71317-71554	DNA polymerase I (EC 2.7.7.7)	LGF
273	71555-71649	Molybdenum cofactor biosynthesis protein MoaB	PMBF
274	71650-71849	Acetylglutamate kinase (EC 2.7.2.8)	LGF
275	71850-72111	Chaperone protein DnaJ	LG
276	72112-72366	Porphobilinogen deaminase (EC 2.5.1.61)	LGF
277	72367-72548	UDP-glucose 4-epimerase (EC 5.1.3.2)	LGF
278	72549-72621	Phosphoribosylformylglycinamidine cyclo-ligase (EC 6.3.3.1)	LG
279	72622-72965	Phospho-N-acetylmuramoyl-pentapeptide-transferase (EC 2.7.8.13)	LG
280	72966-73057	rRNA small subunit methyltransferase I	DCMutF
281	73058-73324	Oligopeptide transport system permease protein OppC (TC 3.A.1.5.1)	LGF
282	73325-73393	3-isopropylmalate dehydrogenase (EC 1.1.1.85)	LGF
283	73394-73651	Lon-like protease with PDZ domain	LGF
284	73652-73905	Transcription termination protein NusA	LG
285	73906-74215	Ubiquinol-cytochrome C reductase iron-sulfur subunit (EC 1.10.2.2)	LG
286	74216-74470	UDP-N-acetylglucosamine--N-acetylmuramyl-(pentapeptide) pyrophosphoryl-undecaprenol N-acetylglucosamine transferase (EC 2.4.1.227)	LGF
287	74471-74670	Phosphoserine phosphatase (EC 3.1.3.3)	LGF
288	74671-74909	23S rRNA (guanosine-2'-O-) -methyltransferase rlmB (EC 2.1.1.-)	LGF
289	74910-75237	Ketol-acid reductoisomerase (EC 1.1.1.86)	LG
290	75238-75377	Pyridoxamine 5'-phosphate oxidase (EC 1.4.3.5)	LGF
291	75378-75472	Uracil phosphoribosyltransferase (EC 2.4.2.9)	LG
292	75473-75636	Ribosome small subunit-stimulated GTPase EngC	WAG
293	75637-75929	Cytochrome d ubiquinol oxidase subunit II (EC 1.10.3.-)	LGF
294	75930-76058	putative DNA-binding protein	LGF
295	76059-76408	Peptide chain release factor 1	LGF
296	76409-76649	ABC-type probable sulfate transporter, permease protein	WAGF
297	76650-76706	FIG000875: Thioredoxin domain-containing protein EC-YbbN	JTT
298	76707-77002	Lipoate synthase	LG
299	77003-77220	Transcriptional regulator, LacI family	cpREVF
300	77221-77377	FIG01122931: hypothetical protein	LGF
301	77378-77587	Glycerol dehydrogenase (EC 1.1.1.6)	LGF
302	77588-77860	4-hydroxy-tetrahydrodipicolinate synthase (EC 4.3.3.7)	LGF
303	77861-78605	Leucyl-tRNA synthetase (EC 6.1.1.4)	LGF
304	78606-78825	Teichoic acid export ATP-binding protein TagH (EC 3.6.3.40)	LGF
305	78826-78970	4-diphosphocytidyl-2-C-methyl-D-erythritol kinase (EC 2.7.1.148)	WAGF
306	78971-79155	Transcription antitermination protein NusG	JTTDCMut
307	79156-79384	Ornithine carbamoyltransferase (EC 2.1.3.3)	LGF
308	79385-79680	N-acetyl-gamma-glutamyl-phosphate reductase (EC 1.2.1.38)	LGF
309	79681-79986	Glycerol-3-phosphate dehydrogenase [NAD(P)+] (EC 1.1.1.94)	WAGF
310	79987-80306	Ribose-phosphate pyrophosphokinase (EC 2.7.6.1)	LG
311	80307-80526	Phosphoribosylformylglycinamidine synthase, glutamine amidotransferase subunit (EC 6.3.5.3)	LG
312	80527-80793	Hydroxymethylglutaryl-CoA lyase (EC 4.1.3.4)	LGF
313	80794-80958	Lead, cadmium, zinc and mercury transporting ATPase (EC 3.6.3.3) (EC 3.6.3.5); Copper-translocating P-type ATPase (EC 3.6.3.4)	Blosum62F
314	80959-81092	Ribose 5-phosphate isomerase B (EC 5.3.1.6) / Galactose 6-phosphate isomerase	LGF
315	81093-81294	Transcriptional regulatory protein glnR	LG
316	81295-81598	Thioredoxin reductase (EC 1.8.1.9)	LGF
317	81599-81712	Ethylmalonyl-CoA mutase, methylsuccinyl-CoA-forming	VT
318	81713-81833	SCBAC25E3.11c, unknown, len: 321aa: contains Pfam match to entry PF02810 SEC-C, SEC-C motif.	JTT
319	81834-82003	putative esterase/lipase	LGF
320	82004-82207	Transcriptional regulator, GntR family	mtZOAF
321	82208-82414	Proline dehydrogenase (EC 1.5.99.8) (Proline oxidase)	JTTDCMutF
322	82415-82616	Excinuclease ABC subunit A paralog of unknown function	LGF
323	82617-82899	Sulfate adenylyltransferase subunit 2 (EC 2.7.7.4)	LGF
324	82900-83170	Thiosulfate sulfurtransferase, rhodanese (EC 2.8.1.1)	WAG
325	83171-83704	DNA topoisomerase I (EC 5.99.1.2)	LGF
326	83705-83731	Cys-tRNA(Pro) deacylase YbaK	Dayhoff
327	83732-83918	Putative deoxyribonuclease YcfH	WAGF
328	83919-83966	Cell division protein FtsK	JTT
329	83967-84816	Ribonucleotide reductase of class II (coenzyme B12-dependent) (EC 1.17.4.1)	LG
330	84817-85085	GCN5-related N-acetyltransferase, FIGfam019367	JTT
331	85086-85261	Cytochrome c oxidase polypeptide II (EC 1.9.3.1)	LG
332	85262-86110	FIG005666: putative helicase	LGF
333	86111-86399	Folate-dependent protein for Fe/S cluster synthesis/repair in oxidative stress	LGF
334	86400-86432	Translation initiation factor 1	PMB
335	86433-86697	putative glycosyltransferase	LGF
336	86698-86931	Heme O synthase, protoheme IX farnesyltransferase (EC 2.5.1.-) COX10-CtaB	LGF
337	86932-87176	3-methyl-2-oxobutanoate hydroxymethyltransferase (EC 2.1.2.11)	LGF
338	87177-87339	RNA polymerase sigma-70 factor	LG
339	87340-87396	tRNA pseudouridine synthase A (EC 4.2.1.70)	LG
340	87397-87679	Probable low-affinity inorganic phosphate transporter	LG
341	87680-87834	putative RNA polymerase ECF-subfamily sigma factor	JTT
342	87835-88076	Ribosomal large subunit pseudouridine synthase D (EC 4.2.1.70)	LGF
343	88077-88325	Malonyl CoA-acyl carrier protein transacylase (EC 2.3.1.39)	LGF
344	88326-88520	PspA/IM30 family protein	LGF
345	88521-88670	CDP-diacylglycerol--glycerol-3-phosphate 3-phosphatidyltransferase (EC 2.7.8.5)	LG
346	88671-88893	L-fuco-beta-pyranose dehydrogenase (EC 1.1.1.122)	WAGF
347	88894-89067	Acyl-CoA thioesterase II (EC 3.1.2.-)	LGF
348	89068-89183	putative RNA polymerase sigma factor	JTTDCMut
349	89184-89374	FIG01126949: hypothetical protein	LGF
350	89375-89650	Cell division protein FtsX	LGF
351	89651-89921	Dipeptide transport system permease protein DppB (TC 3.A.1.5.2)	LGF
352	89922-90008	Hypothetical nudix hydrolase YeaB	JTTDCMut
353	90009-90311	Cysteine synthase B (EC 2.5.1.47)	LG
354	90312-90531	FIG011178: rRNA methylase	LGF
355	90532-90770	Menaquinone via futalosine step 1	LGF
356	90771-91052	Pyridoxine biosynthesis glutamine amidotransferase, synthase subunit (EC 2.4.2.-)	LG
357	91053-91241	Predicted transcriptional regulator of N-Acetylglucosamine utilization, GntR family	JTTF
358	91242-91470	Hypothetical protein DUF194, DegV family	JTTDCMutF
359	91471-91665	1-acyl-sn-glycerol-3-phosphate acyltransferase (EC 2.3.1.51)	LG
360	91666-91935	Ribonuclease Z (EC 3.1.26.11)	LGF
361	91936-92025	Peptidase M48, Ste24p precursor	LG
362	92026-92237	Methionine ABC transporter ATP-binding protein	WAGF
363	92238-92332	FIG00672531: hypothetical protein	Dayhoff
364	92333-92498	Menaquinone via futalosine polyprenyltransferase (MenA homolog)	LGF
365	92499-92708	Histidinol-phosphatase [alternative form] (EC 3.1.3.15)	LGF
366	92709-93304	Aconitate hydratase (EC 4.2.1.3)	WAG
367	93305-94202	Pyruvate dehydrogenase E1 component (EC 1.2.4.1)	LGF
368	94203-94465	Succinyl-CoA ligase [ADP-forming] alpha chain (EC 6.2.1.5)	LGF
369	94466-95144	ClpB protein	LGF
370	95145-95293	COG0613, Predicted metal-dependent phosphoesterases (PHP family)	LGF
371	95294-95527	Methionine aminopeptidase (EC 3.4.11.18)	LG
372	95528-95801	Histidine ammonia-lyase (EC 4.3.1.3)	VTF
373	95802-95988	Proteasome subunit alpha (EC 3.4.25.1), bacterial	LGF
374	95989-96135	DNA recombination and repair protein RecO	DayhoffF
375	96136-96308	Dephospho-CoA kinase (EC 2.7.1.24)	LGF
376	96309-96588	6-phosphogluconate dehydrogenase, decarboxylating (EC 1.1.1.44)	LGF
377	96589-96668	TsaB protein, required for threonylcarbamoyladenosine (t(6)A) formation in tRNA	LGF
378	96669-96829	putative ATP/GTP-binding protein	WAGF
379	96830-97030	Proteasome subunit beta (EC 3.4.25.1), bacterial	LGF
380	97031-97267	Protein-N(5)-glutamine methyltransferase PrmC, methylates polypeptide chain release factors RF1 and RF2	LG
381	97268-97446	Indole-3-glycerol phosphate synthase (EC 4.1.1.48)	LGF
382	97447-97653	Nitrate/nitrite response regulator protein	LG
383	97654-97786	FIG00945644: hypothetical protein	JTT
384	97787-97890	putative two-component system response regulator	JTT
385	97891-98331	Glucoamylase (EC 3.2.1.3)	VTF
386	98332-98534	putative two-component system response regulator	JTT
387	98535-98725	putative ABC transporter ATP-binding protein	LG
388	98726-98927	Octanoate-[acyl-carrier-protein]-protein-N-octanoyltransferase	LG
389	98928-99124	FIG01121229: hypothetical protein	LGF
390	99125-99165	Iron-sulfur cluster regulator SufR	WAG
391	99166-99249	RNA binding methyltransferase FtsJ like	JTT
392	99250-99443	Redox-sensitive transcriptional regulator (AT-rich DNA-binding protein)	JTT
393	99444-99671	Uridine monophosphate kinase (EC 2.7.4.22)	LG
394	99672-99921	ATP phosphoribosyltransferase (EC 2.4.2.17)	LG
395	99922-100136	LSU ribosomal protein L2p (L8e)	rtREV
396	100137-100296	UPF0246 protein YaaA	JTTF
397	100297-100466	Tellurium resistance protein TerD	LGF
398	100467-100689	Phosphoadenylyl-sulfate reductase [thioredoxin] (EC 1.8.4.8) / Adenylyl-sulfate reductase [thioredoxin] (EC 1.8.4.10)	LGF
399	100690-100975	DNA gyrase subunit A (EC 5.99.1.3)	LG
400	100976-101088	Uncharacterized protein Q1 colocalized with Q	LGF
401	101089-101127	L-fuco-beta-pyranose dehydrogenase (EC 1.1.1.122)	LG
402	101128-101260	FIG01126277: hypothetical protein	LGF
403	101261-101361	Phosphoribosylglycinamide formyltransferase (EC 2.1.2.2)	LGF
404	101362-101426	two-component regulator	mtZOA
405	101427-101571	Ribosomal subunit interface protein	LG
406	101572-101671	rRNA small subunit 7-methylguanosine (m7G) methyltransferase GidB	JTT
407	101672-102138	SSU ribosomal protein S1p	WAG
408	102139-102214	Ribosomal-protein-S18p-alanine acetyltransferase (EC 2.3.1.-)	JTT
409	102215-102438	Ribonuclease PH (EC 2.7.7.56)	LGF
410	102439-102880	ATP-dependent DNA helicase UvrD/PcrA	LGF
411	102881-103541	GTP pyrophosphokinase (EC 2.7.6.5), (p)ppGpp synthetase I	LG
412	103542-103761	Metal-dependent hydrolases of the beta-lactamase superfamily III	LGF
413	103762-103935	Transmembrane protein MT2276, clustered with lipoate gene	LG
414	103936-104089	NADH-ubiquinone oxidoreductase chain C (EC 1.6.5.3)	LG
415	104090-104271	Acetoacetyl-CoA reductase (EC 1.1.1.36)	LGF
416	104272-104937	Polyphosphate kinase (EC 2.7.4.1)	LG
417	104938-105027	FIG01123040: hypothetical protein	JTT
418	105028-105103	Anti-sigma F factor antagonist (spoIIAA-2); Anti-sigma B factor antagonist RsbV	LG
419	105104-105208	Exodeoxyribonuclease III (EC 3.1.11.2)	WAG
420	105209-105424	ATP synthase F0 sector subunit a	LGF
421	105425-105577	Tellurium resistance protein TerA	LG
422	105578-105750	putative secreted protein	LGF
423	105751-105971	ABC-type multidrug transport system, permease component	mtInvF
424	105972-106534	ATP-dependent protease La (EC 3.4.21.53) Type I	LGF
425	106535-106618	ubiquinol cytochrome C oxidoreductase, cytochrome C1 subunit	LG
426	106619-106746	Translation initiation factor 3	LG
427	106747-106912	Phosphoribosylformimino-5-aminoimidazole carboxamide ribotide isomerase (EC 5.3.1.16) / Acting phosphoribosylanthranilate isomerase (EC 5.3.1.24)	LGF
428	106913-107375	Cell division protein FtsI [Peptidoglycan synthetase] (EC 2.4.1.129)	LGF
429	107376-107521	4-hydroxy-tetrahydrodipicolinate reductase (EC 1.17.1.8)	LG
430	107522-107597	Ubiquinone biosynthesis monooxygenase UbiB	JTT
431	107598-107718	Hypothetical protein YggS, proline synthase co-transcribed bacterial homolog PROSC	JTTDCMutF
432	107719-107766	5-carboxymethyl-2-hydroxymuconate delta-isomerase (EC 5.3.3.10)	WAG
433	107767-107982	Uracil-DNA glycosylase, family 1	LG
434	107983-108372	Aspartate aminotransferase (EC 2.6.1.1)	LGF
435	108373-108534	Transcriptional regulator, PadR family	JTT
436	108535-108707	Transcriptional regulator, IclR family	LGF
437	108708-108741	NADH-ubiquinone oxidoreductase chain I (EC 1.6.5.3)	WAGF
438	108742-108876	Enoyl-[acyl-carrier-protein] reductase [NADH] (EC 1.3.1.9)	LG
439	108877-109043	NADH-ubiquinone oxidoreductase chain H (EC 1.6.5.3)	LG
440	109044-109247	Hypothetical, related to broad specificity phosphatases COG0406	LGF
441	109248-109350	Acetyltransferase, GNAT family	JTT
442	109351-109427	Succinate dehydrogenase iron-sulfur protein (EC 1.3.99.1)	LG
443	109428-109612	Transcriptional regulator, TetR family	LG
444	109613-109858	Iron-sulfur cluster assembly ATPase protein SufC	LG
445	109859-109980	Lipoprotein signal peptidase (EC 3.4.23.36)	LG
446	109981-110017	Cell division transporter, ATP-binding protein FtsE (TC 3.A.5.1.1)	rtREV
447	110018-110061	putative ABC transporter ATP-binding subunit	mtInvF
448	110062-110213	Low molecular weight protein-tyrosine-phosphatase Wzb (EC 3.1.3.48)	LGF
449	110214-110269	putative nucleotide sugar-1-phosphate transferase	Blosum62F
450	110270-110463	ATP-dependent Clp protease proteolytic subunit (EC 3.4.21.92)	LG
451	110464-110529	Cytidylate kinase (EC 2.7.4.25)	JTT
452	110530-110622	FIG01122262: hypothetical protein	LG
453	110623-110871	FIG000859: hypothetical protein YebC	LG
454	110872-111036	Deoxycytidine triphosphate deaminase (EC 3.5.4.30) (dUMP-forming)	LG
455	111037-111112	COG1399 protein, clustered with ribosomal protein L32p	JTT
456	111113-111273	Ribosomal RNA small subunit methyltransferase D (EC 2.1.1.-)	LGF
457	111274-111443	Nicotinate-nucleotide adenylyltransferase (EC 2.7.7.18)	Dayhoff
458	111444-111575	hypothetical protein SCD25.06	WAGF
459	111576-111620	Phosphoglycolate phosphatase (EC 3.1.3.18)	WAG
460	111621-111770	Uracil phosphoribosyltransferase (EC 2.4.2.9) / Pyrimidine operon regulatory protein PyrR	JTTDCMut
461	111771-111809	DNA-binding response regulator, LuxR family	WAG
462	111810-112015	L-fuco-beta-pyranose dehydrogenase (EC 1.1.1.122)	LGF
463	112016-112213	Imidazole glycerol phosphate synthase amidotransferase subunit (EC 2.4.2.-)	LGF
464	112214-112607	Cysteine desulfurase (EC 2.8.1.7), SufS subfamily	LGF
465	112608-112838	LSU ribosomal protein L1p (L10Ae)	LG
466	112839-112985	LSU ribosomal protein L25p	LGF
467	112986-113193	Trk system potassium uptake protein TrkA	JTT
468	113194-113270	putative two-component system response regulator	JTT
469	113271-113425	FIG01122208: hypothetical protein	LGF
470	113426-114104	DNA ligase (EC 6.5.1.2)	LGF
471	114105-114237	metallo-beta-lactamase superfamily protein	WAGF
472	114238-114416	Trk system potassium uptake protein TrkA	Dayhoff
473	114417-114470	FIG024784: Integral membrane protein related to pyrimidine synthesis	WAGF
474	114471-114591	Transcriptional regulator, MarR family	LGF
475	114592-114755	Transcriptional regulator, TetR family	JTTDCMut
476	114756-114931	putative membrane protein	WAG
477	114932-115293	Adenylosuccinate lyase (EC 4.3.2.2)	LGF
478	115294-115415	Ribosomal-protein-S5p-alanine acetyltransferase	mtZOAF
479	115416-115573	Phosphatidylserine decarboxylase (EC 4.1.1.65)	JTTDCMut
480	115574-115748	LSU ribosomal protein L4p (L1e)	LG
481	115749-115886	Transcriptional regulator, MarR family	LG
482	115887-116023	FIG01121520: hypothetical protein	JTT
483	116024-116113	putative membrane protein	LGF
484	116114-116376	Aspartyl-tRNA(Asn) amidotransferase subunit B (EC 6.3.5.6) @ Glutamyl-tRNA(Gln) amidotransferase subunit B (EC 6.3.5.7)	LGF
485	116377-116544	NADH-ubiquinone oxidoreductase chain B (EC 1.6.5.3)	LG
486	116545-116717	Pyridoxine biosynthesis glutamine amidotransferase, glutaminase subunit (EC 2.4.2.-)	WAGF
487	116718-116928	TsaC protein (YrdC domain) required for threonylcarbamoyladenosine t(6)A37 modification in tRNA	WAG
488	116929-117110	SSU ribosomal protein S4p (S9e)	VT
489	117111-117156	LSU ribosomal protein L3p (L3e)	LG
490	117157-117302	FIG021292: hypothetical protein	JTT
491	117303-117383	2-amino-4-hydroxy-6-hydroxymethyldihydropteridine pyrophosphokinase (EC 2.7.6.3)	LG
492	117384-117447	Nucleoside 5-triphosphatase RdgB (dHAPTP, dITP, XTP-specific) (EC 3.6.1.15)	LGF
493	117448-117583	6,7-dimethyl-8-ribityllumazine synthase (EC 2.5.1.78)	LG
494	117584-117718	SSU ribosomal protein S5p (S2e)	WAG
495	117719-117890	Hypoxanthine-guanine phosphoribosyltransferase (EC 2.4.2.8)	LG
496	117891-118036	Phosphoribosylaminoimidazole carboxylase catalytic subunit (EC 4.1.1.21)	JTTF
497	118037-118202	Orotate phosphoribosyltransferase (EC 2.4.2.10)	LGF
498	118203-118358	FIG129854: hypothetical protein	LG
499	118359-118455	Serine-protein kinase RsbW (EC 2.7.11.1)	JTTDCMut
500	118456-118602	COGs COG2030	LGF
501	118603-118768	Cytochrome c oxidase polypeptide III (EC 1.9.3.1)	LG
502	118769-118960	Phosphate transport regulator (distant homolog of PhoU)	LG
503	118961-119044	Guanylate kinase (EC 2.7.4.8)	FLUF
504	119045-119204	Acetolactate synthase small subunit (EC 2.2.1.6)	LG
505	119205-119730	DNA gyrase subunit B (EC 5.99.1.3)	LG
506	119731-119903	Imidazoleglycerol-phosphate dehydratase (EC 4.2.1.19)	LG
507	119904-120011	2-C-methyl-D-erythritol 2,4-cyclodiphosphate synthase (EC 4.6.1.12)	WAGF
508	120012-120750	Phosphoribosylformylglycinamidine synthase, synthetase subunit (EC 6.3.5.3)	LGF
509	120751-120883	FIG00820627: hypothetical protein	JTTDCMut
510	120884-120981	Phosphohistidine phosphatase SixA	LGF
511	120982-121109	Nickel uptake regulation protein NUR / Ferric uptake regulation protein FUR	WAG
512	121110-121691	Topoisomerase IV subunit B (EC 5.99.1.-)	LGF
513	121692-122201	Cytochrome c oxidase polypeptide I (EC 1.9.3.1)	LGF
514	122202-122328	Leucine-responsive regulatory protein, regulator for leucine (or lrp) regulon and high-affinity branched-chain amino acid transport system	Dayhoff
515	122329-122478	Arginine pathway regulatory protein ArgR, repressor of arg regulon	LG
516	122479-122633	FIG01286523: hypothetical protein	JTTDCMutF
517	122634-122708	putative ankyrin-like protein.	LGF
518	122709-122840	FIG027937: secreted protein	mtZOAF
519	122841-122967	LSU ribosomal protein L17p	LG
520	122968-123145	LSU ribosomal protein L5p (L11e)	LG
521	123146-123897	Two-component hybrid sensor and regulator	WAGF
522	123898-124017	Ribosome-binding factor A	rtREVF
523	124018-124252	N-acetylglucosamine-6-phosphate deacetylase (EC 3.5.1.25)	LGF
524	124253-124437	Ribosome recycling factor	JTTDCMut
525	124438-124570	LSU ribosomal protein L10p (P0)	rtREVF
526	124571-125161	Translation elongation factor LepA	LG
527	125162-125318	Metal-dependent hydrolase YbeY, involved in rRNA and/or ribosome maturation and assembly	LG
528	125319-125909	Acetyl-coenzyme A synthetase (EC 6.2.1.1)	LGF
529	125910-125991	Transcriptional regulator, MarR family	DCMutF
530	125992-126112	RNA-binding protein Jag	JTTDCMut
531	126113-126261	tmRNA-binding protein SmpB	LG
532	126262-126361	HspR, transcriptional repressor of DnaK operon	LG
533	126362-126390	LSU ribosomal protein L13p (L13Ae)	JTTDCMut
534	126391-126526	Phosphopantetheine adenylyltransferase (EC 2.7.7.3)	LG
535	126527-126610	FIG024795: hypothetical protein	WAGF
536	126611-127003	2-oxoglutarate oxidoreductase, alpha subunit (EC 1.2.7.3)	LG
537	127004-127551	Succinate dehydrogenase flavoprotein subunit (EC 1.3.99.1)	LG
538	127552-127640	SSU ribosomal protein S9p (S16e)	Dayhoff
539	127641-127776	FIG01121307: hypothetical protein	WAG
540	127777-127876	Secreted protein	JTT
541	127877-127950	Molybdenum cofactor biosynthesis protein MoaE	LGF
542	127951-128039	putative two-component system response regulator	LG
543	128040-128134	Zinc uptake regulation protein ZUR	JTTDCMut
544	128135-128217	putative glycosyl transferase	WAG
545	128218-128299	WhiB-family transcriptional regulator	JTTDCMut
546	128300-128405	LSU ribosomal protein L11p (L12e)	LG
547	128406-128905	Excinuclease ABC subunit B	JTTF
548	128906-128995	SSU ribosomal protein S16p	LG
549	128996-129330	DNA repair helicase	LG
550	129331-129595	tRNA dimethylallyltransferase (EC 2.5.1.75)	JTTF
551	129596-129732	Putative iron-sulfur cluster assembly scaffold protein for SUF system, SufE2	LG
552	129733-129849	Succinate dehydrogenase hydrophobic membrane anchor protein	PMB
553	129850-130010	Transcription elongation factor GreA	LG
554	130011-130124	Nucleoside diphosphate kinase (EC 2.7.4.6)	LG
555	130125-130383	Serine/threonine protein kinase PrkC, regulator of stationary phase	LG
556	130384-130471	MaoC family protein	LGF
557	130472-130942	Enoyl-CoA hydratase (EC 4.2.1.17) / 3-hydroxyacyl-CoA dehydrogenase (EC 1.1.1.35) / 3-hydroxybutyryl-CoA epimerase (EC 5.1.2.3)	LGF
558	130943-131036	LSU ribosomal protein L15p (L27Ae)	LG
559	131037-131090	NADH ubiquinone oxidoreductase chain A (EC 1.6.5.3)	mtZOA
560	131091-131221	CarD-like transcriptional regulator	LG
561	131222-131317	FIG01121484: hypothetical protein	JTTDCMut
562	131318-131413	Cold shock protein CspC	LGF
563	131414-131479	Sporulation regulatory protein WhiB	VT
564	131480-131583	Transcriptional regulator, FUR family	JTT
565	131584-131669	Histone protein Lsr2	JTT
566	131670-132278	Cell division protein FtsH (EC 3.4.24.-)	LG
567	132279-132379	PaaD-like protein (DUF59) involved in Fe-S cluster assembly	LG
568	132380-132480	NADH-ubiquinone oxidoreductase chain K (EC 1.6.5.3)	LGF
569	132481-132835	GTP-binding and nucleic acid-binding protein YchF	LGF
570	132836-132936	FIG00819990: hypothetical protein	LGF
571	132937-133506	1-deoxy-D-xylulose 5-phosphate synthase (EC 2.2.1.7)	WAGF
572	133507-133816	Phosphoserine aminotransferase (EC 2.6.1.52)	LGF
573	133817-133921	SSU ribosomal protein S13p (S18e)	LG
574	133922-133979	Glycine cleavage system H protein	LGF
575	133980-134079	Dihydroneopterin aldolase (EC 4.1.2.25)	JTTDCMut
576	134080-134115	FIG01124741: hypothetical protein	JTTDCMut
577	134116-134165	YlxP-like protein	JTT
578	134166-134270	probable iron binding protein from the HesB_IscA_SufA family	LG
579	134271-134305	Periplasmic molybdate-binding protein/domain	LG
580	134306-134412	LSU ribosomal protein L7/L12 (P1/P2)	rtREVF
581	134413-134514	SSU ribosomal protein S10p (S20e)	LG
582	134515-134681	Threonyl-tRNA synthetase (EC 6.1.1.3)	LG
583	134682-134760	LSU ribosomal protein L23p (L23Ae)	LG
584	134761-134882	LSU ribosomal protein L14p (L23e)	LG
585	134883-134998	SSU ribosomal protein S11p (S14e)	JTT
586	134999-135074	LSU ribosomal protein L16p (L10e)	cpREV
587	135075-135178	RecA/RadA recombinase	JTTDCMut
588	135179-135508	DNA integrity scanning protein disA	JTTDCMut
589	135509-135580	probable sseC protein	LG
590	135581-136019	Dihydrolipoamide dehydrogenase (EC 1.8.1.4)	LGF
591	136020-136066	FIG01123193: hypothetical protein	JTTDCMut
592	136067-136149	Ferredoxin, 2Fe-2S	LG
593	136150-136752	FIG092679: Fe-S oxidoreductase	LGF
594	136753-136848	RNA polymerase sigma factor RpoD	VT
595	136849-136932	ATP synthase epsilon chain (EC 3.6.3.14)	LGF
596	136933-137052	LSU ribosomal protein L20p	LG
597	137053-137091	4Fe-4S ferredoxin, iron-sulfur binding	VT
598	137092-137199	Succinate dehydrogenase cytochrome b-556 subunit	LG
599	137200-137269	LSU ribosomal protein L22p (L17e)	WAG
600	137270-137594	TsaD/Kae1/Qri7 protein, required for threonylcarbamoyladenosine t(6)A37 formation in tRNA	LGF
601	137595-137916	O-succinylbenzoic acid--CoA ligase (EC 6.2.1.26)	LGF
602	137917-138189	4-hydroxy-3-methylbut-2-enyl diphosphate reductase (EC 1.17.1.2)	LG
603	138190-138473	Methionine ABC transporter ATP-binding protein	LGF
604	138474-138573	Protein often found in Actinomycetes clustered with signal peptidase and/or RNaseHII	LG
