# Supplementary material for: The natural product co-evolved pyrroloquinoline quinone gene enhances their production when heterologously expressed in a variety of Streptomycetes
Source: Research Square preprint supplement (doi:10.21203/rs.3.rs-2734079/v1), 2023-04-04
Supplement: Supplementary file 2 [file d7dbc4342e7215d39b017ff9.xlsx]

## Sheet: Supp_table_PCM1
Strain	Refseq assembly ID	# contigs	Total length (>= 0 bp)	Largest contig	G+C content(%)	N50	Complete BUSCO (%)
Acidipropionibacterium acidipropionici ATCC 4875	GCF000310065	1	3656070	3656070	68.77	3656070	97.44
Acidothermus cellulolyticus 11B 11B ATCC 43068	GCF000015025	1	2443540	2443540	66.91	2443540	94.6
Actinoalloteichus hoggarensis DSM 45943	GCF002234535	1	6606717	6606717	71.15	6606717	98.01
Actinoalloteichus hymeniacidonis HPA177T DSM 45092T	GCF001747425	1	6306386	6306386	68.08	6306386	98.3
Actinoalloteichus sp ADI127 7	GCF001941625	1	7120854	7120854	70.09	7120854	98.01
Actinoalloteichus sp GBA129 24	GCF001941645	2	7275394	7215977	70.1	7215977	98.01
Actinobacteria bacterium IMCC19121	GCF002284895	1	1506415	1506415	45.45	1506415	86.36
Actinobacteria bacterium IMCC25003	GCF002284855	1	1353947	1353947	49.05	1353947	90.62
Actinobacteria bacterium IMCC26077	GCF002284915	1	1551612	1551612	51.31	1551612	89.49
Actinobacteria bacterium IMCC26103	GCF002284875	1	1456516	1456516	46.96	1456516	86.65
Actinobaculum massiliense ACS 171 V Col2	GCF000315465	2	2020908	1688770	60.23	1688770	90.62
Actinomyces gaoshouyii pika 114	GCF002076915	1	2359360	2359360	71.08	2359360	95.74
Actinomyces meyeri W712	GCF001262055	1	2049088	2049088	65.51	2049088	93.18
Actinomyces neuii BVS029A5	GCF000296485	7	2136693	561671	56.63	392001	95.17
Actinomyces odontolyticus ATCC 17982	GCF000154225	2	2393731	2391116	65.45	2391116	95.74
Actinomyces oris T14V	GCF001553935	1	3042917	3042917	68.46	3042917	96.59
Actinomyces radicidentis CCUG 36733	GCF001553565	1	3051613	3051613	72.58	3051613	96.88
Actinomyces radingae DSM 9169	GCF900106055	1	2430193	2430193	58.93	2430193	97.73
Actinomyces timonensis DSM 23838 7400942	GCF000295095	4	2912116	1416143	71.2	920386	95.45
Actinomyces urinae Marseille P2225	GCF900119695	3	1946824	1652536	56.13	1652536	92.61
Actinoplanes derwentensis DSM 43941	GCF900104725	1	10654081	10654081	69.36	10654081	97.44
Actinoplanes friuliensis DSM 7358	GCF000494755	1	9376071	9376071	70.36	9376071	98.01
Actinoplanes missouriensis 431	GCF000284295	1	8773466	8773466	70.82	8773466	97.73
Actinoplanes sp N902 109	GCF000389965	1	9228054	9228054	71.31	9228054	97.73
Actinoplanes sp SE50 110 ACP50	GCF900119315	1	9240166	9240166	71.32	9240166	97.16
Actinoplanes sp SE50 110	GCF000237145	1	9239851	9239851	71.32	9239851	97.16
Actinoplanes sp SE50	GCF002717025	1	9239482	9239482	71.32	9239482	97.16
Actinopolymorpha singaporensis DSM 22024	GCF900104745	1	6403569	6403569	70.61	6403569	96.88
Actinopolyspora erythraea YIM 90600	GCF002263515	1	5243930	5243930	68.78	5243930	97.44
Actinopolyspora halophila DSM 43834	GCF000371785	2	5353111	5258321	68.02	5258321	97.73
Actinopolyspora mortivallis DSM 44261 HS 1	GCF000384035	1	4230767	4230767	68.79	4230767	97.44
Actinopolyspora saharensis DSM 45459	GCF900100925	2	4682246	2627129	69.46	2627129	98.58
Actinospica robiniae DSM 44927	GCF000504285	1	9918639	9918639	70.26	9918639	96.02
Actinosynnema mirum DSM 43827	GCF000023245	1	8248144	8248144	73.71	8248144	97.73
Actinosynnema pretiosum X47	GCF002354875	1	8131572	8131572	73.91	8131572	97.73
Actinotignum schaalii CCUG 27420	GCF000724605	1	2159306	2159306	62.19	2159306	86.65
Aeromicrobium choanae 9H 4	GCF900167475	1	3421926	3421926	71.01	3421926	97.44
Aeromicrobium erythreum AR18	GCF001509405	1	3629239	3629239	72.14	3629239	96.02
Aeromicrobium marinum DSM 15272	GCF000160775	1	3077815	3077815	71.11	3077815	96.02
Aeromicrobium massiliense JC14 JC14	GCF000312105	5	3314522	1386516	72.65	1117861	96.59
Aeromicrobium sp Root236	GCF001428805	1	3918964	3918964	69.01	3918964	97.44
Aeromicrobium sp Root344	GCF001425755	1	3872678	3872678	68.76	3872678	96.88
Aestuariimicrobium kwangyangense DSM 21549	GCF000421525	5	2990212	1461146	68.55	743733	96.59
Agreia pratensis VKM Ac 2510	GCF900177685	10	3582791	1129106	65.39	860325	94.03
Agrococcus baldri IAM 15147	GCF900114805	7	2904481	852980	71.17	843795	94.6
Agrococcus carbonis DSM 22965	GCF900104705	1	2773210	2773210	72.99	2773210	91.19
Agrococcus jejuensis DSM 22002	GCF900099705	1	3400078	3400078	72.64	3400078	94.6
Agrococcus sp Marseille P2731	GCF900117395	3	3021006	1321246	71.82	885636	93.75
Agromyces aureus AR33	GCF001660485	1	4373124	4373124	70.39	4373124	94.03
Agromyces cerinus cerinus DSM 8595	GCF900142065	8	4187589	1310047	69.97	946234	94.89
Agromyces flavus CPCC 202695	GCF900104685	1	3692308	3692308	71.3	3692308	93.75
Agromyces sp Root1464	GCF001427265	3	4042448	2160886	70.08	2160886	94.03
Alloactinosynnema sp L 07 Alloactinosynnema sp L 07	GCF900070365	1	7405112	7405112	69.59	7405112	98.86
Allokutzneria albata DSM 44149	GCF900103775	1	8565519	8565519	70.26	8565519	97.73
Amycolatopsis alba DSM 44262	GCF000384215	1	9810906	9810906	68.69	9810906	98.86
Amycolatopsis australiensis DSM 44671	GCF900119165	10	9312205	9115762	71.87	9115762	98.3
Amycolatopsis balhimycina FH 1894 DSM 44591	GCF000384295	1	10857128	10857128	70.77	10857128	98.3
Amycolatopsis benzoatilytica AK 16 65	GCF000383915	1	8702286	8702286	69.95	8702286	98.01
Amycolatopsis halophila YIM 93223	GCF000504245	1	5550762	5550762	67.76	5550762	98.3
Amycolatopsis japonica MG417 CF17	GCF000732925	2	9053862	8961318	68.89	8961318	98.3
Amycolatopsis keratiniphila FH 1893	GCF900105855	1	9472522	9472522	68.83	9472522	98.58
Amycolatopsis lurida DSM 43134	GCF900105055	4	9047313	7823164	68.68	7823164	98.86
Amycolatopsis mediterranei RB	GCF000454025	1	10246864	10246864	71.29	10246864	98.58
Amycolatopsis mediterranei S699	GCF000220945	1	10236779	10236779	71.29	10236779	98.58
Amycolatopsis mediterranei S699	GCF000282715	1	10246920	10246920	71.29	10246920	98.58
Amycolatopsis mediterranei U32	GCF000196835	1	10236715	10236715	71.29	10236715	98.58
Amycolatopsis methanolica 239	GCF000371885	2	7196609	6804400	71.53	6804400	98.86
Amycolatopsis methanolica 239	GCF000739085	1	7237391	7237391	71.53	7237391	98.86
Amycolatopsis nigrescens CSC17Ta 90	GCF000384315	1	9110928	9110928	70.01	9110928	98.86
Amycolatopsis orientalis B 37	GCF000943515	1	9490992	9490992	68.83	9490992	96.88
Amycolatopsis orientalis HCCB10007	GCF000400635	2	8982101	8948591	69.01	8948591	98.86
Amycolatopsis sp AA4	GCF002796545	3	9172873	8800243	69.79	8800243	97.73
Amycolatopsis sp CB00013	GCF001905755	9	9015680	2203361	68.86	1488671	98.86
Amycolatopsis sulphurea DSM 46092	GCF002564045	2	6856314	5507604	69.41	5507604	96.88
Amycolatopsis thermoflava N1165	GCF000473265	2	8692718	8677298	71.57	8677298	98.3
Amycolatopsis tolypomycina DSM 44544	GCF900105945	4	10363499	8172454	71.67	8172454	97.73
Arcanobacterium haemolyticum DSM 20595	GCF000092365	1	1986154	1986154	53.13	1986154	87.78
Arcanobacterium phocae DSM 10002	GCF900105865	1	1998242	1998242	49.97	1998242	90.06
Arcanobacterium urinimassiliense Marseille P3248	GCF900119495	2	1667268	1662150	49.06	1662150	86.08
Arsenicicoccus sp oral 190 F0371	GCF001189535	1	3525271	3525271	72.73	3525271	98.01
Arthrobacter alpinus R3.8	GCF001294625	1	4046453	4046453	62.2	4046453	98.01
Arthrobacter crystallopoietes DSM 20117	GCF900100805	3	5198512	4753283	64.36	4753283	97.73
Arthrobacter sp ATCC 21022	GCF001542565	1	4434904	4434904	63.41	4434904	97.44
Arthrobacter sp LS16	GCF001281115	1	3851242	3851242	64.32	3851242	96.59
Arthrobacter sp PAMC 25486	GCF000785535	1	4593555	4593555	62.79	4593555	97.16
Arthrobacter sp QXT 31	GCF001969265	1	5041568	5041568	66	5041568	98.01
Arthrobacter sp YN	GCF002224285	1	5063552	5063552	62.65	5063552	96.02
Arthrobacter woluwensis DSM 10495	GCF900105345	9	3859764	3295498	68.11	3295498	98.3
Aurantimicrobium minutum KNC	GCF002355535	1	1622386	1622386	52.76	1622386	91.48
Auraticoccus monumenti MON 2.2	GCF900101785	1	4461688	4461688	73.1	4461688	96.88
Austwickia chelonae DSM 44178	GCF900111385	9	3544447	1740440	66.16	1002473	97.73
Beutenbergia cavernae DSM 12333	GCF000023105	1	4669183	4669183	73.12	4669183	94.89
Bifidobacterium actinocoloniiforme DSM 22766	GCF001263395	1	1830060	1830060	62.71	1830060	89.49
Bifidobacterium adolescentis 22L	GCF000737885	1	2203188	2203188	59.3	2203188	96.59
Bifidobacterium angulatum DSM 20098 JCM 7096	GCF001025155	1	2021974	2021974	59.43	2021974	97.44
Bifidobacterium animalis A6	GCF000817045	1	1958651	1958651	60.49	1958651	95.17
Bifidobacterium asteroides DSM 20089	GCF002715865	1	2190368	2190368	60.01	2190368	94.6
Bifidobacterium bifidum ATCC 29521 JCM 1255 DSM 20456	GCF001025135	1	2211039	2211039	62.66	2211039	95.45
Bifidobacterium bohemicum DSM 22767	GCF000741525	5	2052222	890534	57.46	579100	93.75
Bifidobacterium bombi DSM 19703	GCF000737845	4	1895213	1617832	56.08	1617832	93.75
Bifidobacterium breve 12L	GCF000568955	1	2244624	2244624	58.87	2244624	97.44
Bifidobacterium catenulatum DSM 16992 JCM 1194 LMG 11043	GCF001025195	1	2079525	2079525	56.2	2079525	96.59
Bifidobacterium choerinum FMB 1	GCF002761235	2	2257310	2246298	65.53	2246298	96.31
Bifidobacterium commune R 52791	GCF900094885	4	1631747	940651	53.99	940651	93.18
Bifidobacterium scardovii JCM 12489 DSM 13734	GCF001042635	1	3158347	3158347	64.63	3158347	96.59
Bifidobacterium thermacidophilum porcinum LMG 21689	GCF000741445	3	2079386	1857310	60.2	1857310	95.45
Bifidobacterium thermophilum RBL67	GCF000347695	1	2291643	2291643	60.11	2291643	95.74
Brachybacterium faecium DSM 4810	GCF000023405	1	3614992	3614992	72.05	3614992	97.16
Brachybacterium ginsengisoli DCY80	GCF002407065	1	3953253	3953253	71.57	3953253	96.31
Brachybacterium sp P6 10 X1	GCF001969445	1	4385603	4385603	70.93	4385603	95.45
Brachybacterium sp VM2412	GCF002407185	1	3796663	3796663	70.84	3796663	96.31
Brachybacterium sp VR2415	GCF002216795	3	3568547	3459767	70.43	3459767	94.03
Brevibacterium flavum ATCC 15168	GCF000987865	1	3338699	3338699	54.14	3338699	97.73
Brevibacterium linens BS258	GCF001606005	1	3862244	3862244	64.16	3862244	94.03
Brevibacterium sandarakinum DSM 22082	GCF900105045	1	4440957	4440957	63.3	4440957	94.6
Brevibacterium siliguriense DSM 23676	GCF900105315	1	4022983	4022983	64.18	4022983	94.32
Catenulispora acidiphila DSM 44928	GCF000024025	1	10467782	10467782	69.77	10467782	97.16
Cellulomonas fimi ATCC 484	GCF000212695	1	4266344	4266344	74.72	4266344	97.44
Cellulomonas flavigena DSM 20109	GCF000092865	1	4123179	4123179	74.29	4123179	96.88
Cellulomonas gilvus ATCC 13127	GCF000218545	1	3526441	3526441	73.81	3526441	98.01
Cellulomonas massiliensis JC225 JC225	GCF000312005	7	3239072	3223667	74.82	3223667	94.03
Cellulomonas sp PSBB021	GCF002240455	1	3794193	3794193	73.57	3794193	95.74
Cellulomonas sp Root930	GCF001429255	4	4247187	3465883	72.52	3465883	97.44
Cellulosimicrobium cellulans PSBB019	GCF002162335	1	4799856	4799856	74.14	4799856	97.73
Cellulosimicrobium sp TH 20	GCF002105775	1	4265546	4265546	74.6	4265546	97.73
Clavibacter capsici PF008	GCF001280205	3	3241733	3056296	73.18	3056296	94.03
Clavibacter insidiosus LMG 3663	GCF002240565	3	3387206	3244165	72.71	3244165	92.9
Clavibacter michiganensis CASJ009	GCF002150995	1	3268273	3268273	73.57	3268273	88.35
Clavibacter nebraskensis NCPPB 2581 type strain NCPPB 2581	GCF000355695	1	3063596	3063596	73	3063596	96.31
Clavibacter sepedonicus ATCC 33113	GCF000069225	3	3403805	3258645	72.38	3258645	94.6
Clavibacter tessellarius ATCC 33566	GCF002240635	2	3318546	3257645	73.65	3257645	93.75
Cnuibacter physcomitrellae XAT	GCF002096055	3	4351684	4061536	70.79	4061536	96.31
Compostimonas suwonensis DSM 25625	GCF002797855	10	3882595	876712	69.28	725468	95.17
Corynebacterium ammoniagenes DSM 20306 DSM 20306 9.6	GCF001941425	1	2790185	2790185	55.54	2790185	98.3
Corynebacterium aquilae DSM 44791 S 613	GCF001941445	1	2926427	2926427	60.92	2926427	96.88
Corynebacterium argentoratense DSM 44202	GCF000590555	1	2031068	2031068	58.9	2031068	96.59
Corynebacterium atypicum R2070	GCF000732945	2	2359051	2310983	65.36	2310983	97.44
Corynebacterium aurimucosum ATCC 700975	GCF000022905	2	2819235	2790189	60.56	2790189	98.01
Corynebacterium callunae DSM 20147	GCF000344785	3	2928717	2839576	52.45	2839576	97.44
Corynebacterium camporealensis DSM 44610	GCF000980815	1	2450658	2450658	59.41	2450658	98.3
Corynebacterium capitovis DSM 44611	GCF000372085	5	1960911	667305	64.53	641386	96.02
Corynebacterium casei LMG S 19264	GCF000550785	3	3132189	3113455	55.68	3113455	97.73
Corynebacterium caspium DSM 44850	GCF000379705	8	1842975	458719	49.72	420979	94.89
Corynebacterium coyleae DSM 44184	GCF900105505	2	2568968	2549859	61.32	2549859	96.88
Corynebacterium crudilactis JZ16	GCF001643015	3	3217262	3047337	51.75	3047337	98.3
Corynebacterium cystitidis NCTC11863	GCF900187295	1	3011567	3011567	56.93	3011567	98.01
Corynebacterium deserti GIMN1.010	GCF001277995	3	3033669	2971916	55.25	2971916	97.44
Corynebacterium diphtheriae 241	GCF000241895	1	2426551	2426551	53.43	2426551	98.3
Corynebacterium doosanense CAU 212 DSM 45436	GCF000767055	2	2699024	2671827	66.78	2671827	98.86
Corynebacterium efficiens YS 314	GCF000011305	3	3219541	3147117	62.97	3147117	98.58
Corynebacterium epidermidicanis DSM 45586	GCF001021025	1	2692072	2692072	58.06	2692072	97.73
Corynebacterium falsenii DSM 44353 BL 8171	GCF000525655	2	2719003	2676994	63.16	2676994	97.16
Corynebacterium flavescens OJ8	GCF001941465	1	2758653	2758653	59.92	2758653	98.3
Corynebacterium frankenforstense DSM 45800 ST18	GCF001941485	1	2604152	2604152	71.51	2604152	98.58
Corynebacterium genitalium ATCC 33030	GCF000143825	1	2349611	2349611	62.73	2349611	98.58
Corynebacterium glaucum DSM 30827	GCF002287505	1	2518651	2518651	62.97	2518651	97.44
Corynebacterium glutamicum ATCC 13032 DSM 20300	GCF000196335	1	3282708	3282708	53.84	3282708	98.01
Corynebacterium glyciniphilum AJ 3170	GCF000626675	2	3568243	3509811	64.75	3509811	97.16
Corynebacterium halotolerans YIM 70093 DSM 44683	GCF000341345	2	3221897	3135641	68.3	3135641	98.58
Corynebacterium humireducens NBRC 106098 DSM 45392	GCF000819445	1	2681312	2681312	68.57	2681312	98.86
Corynebacterium ihumii GD7	GCF000403725	5	2231166	754232	65.08	751291	95.74
Corynebacterium imitans DSM 44264	GCF000739455	1	2563209	2563209	64.28	2563209	97.44
Corynebacterium jeikeium FDAARGOS 328	GCF002209185	1	2650792	2650792	58.65	2650792	96.31
Corynebacterium kroppenstedtii DSM 44385	GCF000023145	1	2446804	2446804	57.46	2446804	96.02
Corynebacterium kutscheri DSM 20755	GCF000980835	1	2354065	2354065	46.46	2354065	97.73
Corynebacterium lactis RW2 5	GCF001274895	1	2769745	2769745	60.53	2769745	97.16
Corynebacterium marinum DSM 44953	GCF000835165	3	2729264	2607303	67.75	2607303	98.3
Corynebacterium maris DSM 45190	GCF000442645	2	2833560	2787574	66.58	2787574	98.3
Corynebacterium matruchotii ATCC 14266	GCF000175375	8	2856023	930645	57.09	667155	98.3
Corynebacterium mustelae DSM 45274	GCF001020985	3	3474271	3391590	52.57	3391590	98.01
Corynebacterium mycetoides DSM 20632	GCF900103625	1	2266370	2266370	66.59	2266370	98.3
Corynebacterium oculi NML 130210	GCF001412105	4	2413917	826306	64.8	721185	98.58
Corynebacterium phocae M408 89 1	GCF001941565	2	2791283	2779000	58.81	2779000	98.86
Corynebacterium pseudotuberculosis 1002B	GCF001433475	1	2335107	2335107	52.19	2335107	98.01
Corynebacterium pyruviciproducens ATCC BAA 1742	GCF000411375	3	2703383	1450599	61.21	1450599	97.73
Corynebacterium renale DSM 20688	GCF002563965	1	2348927	2348927	59.13	2348927	97.16
Corynebacterium resistens DSM 45100	GCF000177535	1	2601311	2601311	57.09	2601311	96.59
Corynebacterium riegelii PUDD 83A45	GCF001263755	1	2561634	2561634	60.54	2561634	97.16
Corynebacterium simulans PES1	GCF001586215	1	2737971	2737971	59.01	2737971	97.16
Corynebacterium singulare IBS B52218	GCF000833575	1	2829998	2829998	60.12	2829998	98.01
Corynebacterium sp ATCC 6931	GCF000755185	1	2471920	2471920	58.63	2471920	96.88
Corynebacterium sp KPL1824	GCF000478095	2	2626738	1353004	59.26	1353004	98.58
Corynebacterium sphenisci DSM 44792	GCF001941505	1	2594799	2594799	74.73	2594799	97.44
Corynebacterium stationis ATCC 21170	GCF002214685	1	2847162	2847162	54.83	2847162	98.3
Corynebacterium striatum 215	GCF002803965	1	2993983	2993983	59.2	2993983	98.58
Corynebacterium terpenotabidum Y 11	GCF000418365	1	2751233	2751233	67.02	2751233	96.59
Corynebacterium testudinoris DSM 44614	GCF001021045	1	2721226	2721226	63.14	2721226	98.3
Corynebacterium timonense DSM 45434	GCF900105305	1	2633085	2633085	66.62	2633085	98.01
Corynebacterium ulcerans 0102	GCF000306825	1	2579188	2579188	53.36	2579188	99.15
Corynebacterium ulceribovis DSM 45146	GCF000372445	8	2300101	1158352	59.23	1158352	97.73
Corynebacterium urealyticum DSM 7109	GCF000069945	1	2369219	2369219	64.19	2369219	95.45
Corynebacterium ureicelerivorans IMMIB RIV 2301	GCF000747315	2	2326608	2278320	65.01	2278320	96.02
Corynebacterium uterequi DSM 45634	GCF001021065	1	2419437	2419437	65.5	2419437	98.3
Corynebacterium variabile DSM 44702	GCF000179395	1	3433007	3433007	67.15	3433007	96.31
Corynebacterium vitaeruminis DSM 20294	GCF000550805	1	2931780	2931780	65.53	2931780	98.86
Cryobacterium sp LW097	GCF002205495	3	3961369	3790200	67.52	3790200	93.47
Cryocola sp 340MFSha3.1	GCF000383315	2	4090369	2267241	69.85	2267241	94.89
Cryptosporangium arvum DSM 44712	GCF000585375	1	9195505	9195505	71.7	9195505	96.88
Curtobacterium pusillum AA3	GCF002025645	2	4541057	3973750	70.35	3973750	93.47
Curtobacterium sp BH 2 1 1	GCF001806325	1	3795948	3795948	71.44	3795948	93.75
Curtobacterium sp MR MD2014	GCF000772085	1	3443800	3443800	71.95	3443800	93.75
Cutibacterium acnes A1 14	GCF001481615	1	2398504	2398504	60.07	2398504	96.88
Cutibacterium avidum 44067	GCF000367205	1	2526138	2526138	63.48	2526138	96.59
Cutibacterium avidum ATCC 25577	GCF000227295	7	2533219	2521926	63.43	2521926	96.59
Cutibacterium avidum T14	GCF001866625	9	2522150	873443	63.39	802850	96.88
Cutibacterium granulosum NCTC11865	GCF900186975	1	2175244	2175244	64.19	2175244	96.59
Demequina aestuarii NBRC 106260	GCF000975095	6	2790155	2471163	69.14	2471163	96.02
Demequina aurantiaca NBRC 106265	GCF000975135	6	2564855	1865831	64.61	1865831	96.88
Demequina flava NBRC 105854	GCF000975035	3	2545768	1815663	64.74	1815663	97.16
Demequina globuliformis NBRC 106266	GCF000975155	8	2621425	1828679	66.33	1828679	95.74
Demequina oxidasica NBRC 106264	GCF000975115	8	2623505	1516686	64.05	1516686	95.74
Demequina sp NBRC 110052	GCF002090075	5	2614171	1548492	69.62	1548492	96.31
Demequina sp NBRC 110053	GCF002090095	3	2498602	1954051	70.48	1954051	96.31
Demetria terragena DSM 11295	GCF000376825	4	3574817	2734295	64.74	2734295	96.59
Dermabacter sp HFH0086	GCF000413375	1	2361016	2361016	62.78	2361016	93.18
Dermabacter vaginalis AD1 86	GCF001678905	1	2392314	2392314	62.59	2392314	92.9
Dermacoccus nishinomiyaensis M25	GCF000725405	2	3113664	3029043	69.04	3029043	97.73
Dermatophilus congolensis NCTC13039	GCF900187045	1	2627820	2627820	59.42	2627820	94.03
Devriesea agamarum IMP2	GCF900070355	1	2958880	2958880	60.14	2958880	97.73
Diaminobutyricimonas aerilata DSM 27393	GCF002797715	1	3494536	3494536	70.68	3494536	93.75
Dietzia timorensis ID05 A0528	GCF001659785	1	3607892	3607892	65.58	3607892	96.59
Flaviflexus massiliensis SIT4	GCF001375495	7	2631112	1760154	59.12	1760154	95.45
Frankia alni ACN14a ACN14A	GCF000058485	1	7497934	7497934	72.83	7497934	95.45
Frankia casuarinae CcI3	GCF000013345	1	5433628	5433628	70.08	5433628	94.32
Frankia inefficax EuI1c	GCF000166135	1	8815781	8815781	72.31	8815781	95.45
Frankia sp CN3	GCF000235425	2	9963195	8179012	71.8	8179012	94.32
Frankia sp EAN1pec EAN1.pec	GCF000018005	1	8982042	8982042	71.15	8982042	95.17
Frankia symbiont of Datisca glomerata 4085684	GCF000177615	3	5341026	5323216	70	5323216	94.03
Friedmanniella luteola DSM 21741	GCF900105065	1	4717514	4717514	73.72	4717514	96.59
Friedmanniella sagamiharensis DSM 21743	GCF900105785	1	4405185	4405185	73.36	4405185	96.88
Frondihabitans sp Leaf304	GCF001423105	5	3449252	2269907	67.65	2269907	93.47
Frondihabitans sp PAMC 28766	GCF001577365	4	4766890	4345897	68.43	4345897	89.49
Gardnerella vaginalis HMP9231	GCF000213955	1	1726447	1726447	41.23	1726447	91.19
Geodermatophilus obscurus DSM 43160	GCF000025345	1	5322497	5322497	73.98	5322497	97.16
Geodermatophilus taihuensis DSM 45962	GCF900112525	10	4317004	1576734	74.88	872718	96.88
Georgenia soli DSM 21838	GCF002563695	4	4273708	3974728	72.67	3974728	97.16
Glutamicibacter arilaitensis KLBMP 5180	GCF001302565	2	3918457	3911831	59.99	3911831	96.31
Glutamicibacter mysorens DSM 12798	GCF002797775	1	3459735	3459735	61.95	3459735	97.73
Gordonia bronchialis DSM 43247	GCF000024785	2	5290056	5208646	67.04	5208646	98.86
Gordonia malaquae DSM 45064	GCF900105435	8	4714447	2478552	66.22	2478552	99.43
Gordonia phthalatica QH 11	GCF001305675	1	4428727	4428727	68	4428727	99.43
Gordonia polyisoprenivorans herm 1	GCF002257745	3	6180548	5136068	66.95	5136068	99.72
Gordonia polyisoprenivorans HW436	GCF000385355	1	6328494	6328494	66.87	6328494	99.15
Gordonia polyisoprenivorans VH2	GCF000247715	2	5844309	5669805	66.98	5669805	99.72
Gordonia terrae 3612	GCF001698225	1	5701501	5701501	67.81	5701501	98.58
Haloactinobacterium album DSM 21368	GCF900105765	2	4830527	2546247	68.61	2546247	96.88
Haloglycomyces albus DSM 45210	GCF000527155	1	3535217	3535217	60.37	3535217	95.74
Hoyosella subflava DQS3 9A1	GCF000214175	3	4863528	4738838	62.24	4738838	99.72
Intrasporangium calvum DSM 43043	GCF000184685	1	4024382	4024382	70.7	4024382	98.58
Isoptericola dokdonensis DS 3	GCF001636295	1	3826972	3826972	73.81	3826972	96.02
Isoptericola jiangsuensis DSM 21863	GCF002563715	1	4041252	4041252	73.83	4041252	97.44
Isoptericola variabilis 225	GCF000215105	1	3307740	3307740	73.89	3307740	98.3
Janibacter indicus YFY001	GCF001889125	1	3401189	3401189	71.24	3401189	99.43
Janibacter melonis CD11 4	GCF001637565	7	3196635	957578	72.99	906946	97.44
Janibacter sp HTCC2649	GCF000152705	7	4228629	4215298	68.44	4215298	97.16
Jatrophihabitans endophyticus DSM 45627	GCF900129455	10	4480148	1119072	72.94	953441	96.88
Jatrophihabitans sp GAS493	GCF900230215	1	4879921	4879921	66.94	4879921	97.73
Jiangella alba DSM 45237	GCF900106035	4	7681940	3722547	72.82	3325342	97.16
Jiangella alkaliphila DSM 45079	GCF900105925	1	7716500	7716500	72.1	7716500	96.88
Jonesia denitrificans DSM 20603	GCF000024065	1	2749646	2749646	58.42	2749646	98.01
Kibdelosporangium phytohabitans KLBMP1111	GCF001302585	1	11759770	11759770	68.44	11759770	97.44
Kineococcus radiotolerans SRS30216 ATCC BAA 149	GCF000017305	3	4956737	4761229	74.24	4761229	95.17
Kitasatospora albolonga YIM 101047	GCF002082585	1	8027788	8027788	71.98	8027788	100
Kitasatospora aureofaciens DM 1	GCF002082605	2	7076433	6824334	72.57	6824334	98.58
Kitasatospora azatica KCTC 9699	GCF000744785	3	8272345	5708283	71.59	5708283	98.58
Kitasatospora cheerisanensis KCTC 2395	GCF000696185	5	8030073	7879887	73.55	7879887	98.58
Kitasatospora griseola MF730 N6	GCF000836635	8	7966269	3566172	72.73	2590787	98.3
Kitasatospora mediocidica KCTC 9733	GCF000744225	7	8681857	2728129	71.9	1536135	98.86
Kitasatospora setae KM 6054	GCF000269985	1	8783278	8783278	74.2	8783278	98.58
Kitasatospora sp OK780	GCF002813365	3	8809996	8087570	73.11	8087570	99.15
Kocuria flava HO 9041	GCF001482365	5	3638378	3504335	73.93	3504335	96.31
Kocuria palustris MU14 1	GCF001275345	1	2854447	2854447	70.5	2854447	94.6
Kocuria rhizophila DC2201 DC2201 NBRC 103217	GCF000010285	1	2697540	2697540	71.16	2697540	94.6
Kocuria turfanensis HO 9042	GCF001580365	5	4159550	3742074	72.75	3742074	94.89
Kocuria varians 80	GCF002250745	2	2822981	2389426	70.55	2389426	94.03
Krasilnikoviella flava DSM 21481	GCF900167525	10	4845968	1053955	73.74	657302	98.3
Kribbella flavida DSM 17836	GCF000024345	1	7579488	7579488	70.57	7579488	98.01
Kutzneria albida DSM 43870	GCF000525635	1	9874858	9874858	70.6	9874858	97.44
Kutzneria sp 744	GCF000568255	1	11414749	11414749	69.81	11414749	90.06
Kytococcus aerolatus DSM 22179	GCF900187395	5	2402472	1477589	72.34	1477589	94.32
Kytococcus sedentarius DSM 20547	GCF000023925	1	2785024	2785024	71.63	2785024	93.75
Lawsonella clevelandensis X1036	GCF001293125	1	1860073	1860073	58.59	1860073	95.17
Leifsonia sp 98AMF	GCF900114505	1	4141072	4141072	69.77	4141072	96.02
Leifsonia sp Root60	GCF001427485	4	3614146	2520611	68.25	2520611	93.75
Leifsonia xyli xyli CTCB07	GCF000007665	1	2584158	2584158	67.68	2584158	94.32
Lentzea guizhouensis DHS C013	GCF001701025	1	9997872	9997872	70.01	9997872	97.44
Leucobacter chromiiresistens DSM 22788	GCF900102345	2	3215003	2823343	70.3	2823343	94.89
Luteipulveratus halotolerans C296001	GCF001247745	3	4464322	4233273	70.05	4233273	97.44
Luteipulveratus mongoliensis MN07 A0370	GCF001190945	1	5420910	5420910	68.24	5420910	97.44
Lysinimicrobium aestuarii NBRC 109398	GCF000971375	7	3147320	973909	72.12	928101	96.31
Marmoricola scoriae DSM 22127	GCF900104965	1	4058482	4058482	73.5	4058482	97.16
Marmoricola sp Leaf446	GCF001424755	9	3811506	1710453	73.38	692840	97.73
Microbacterium agarici DSM 21798	GCF002563955	1	3233920	3233920	64.54	3233920	94.89
Microbacterium aurum KACC 15219	GCF001974985	1	3424892	3424892	69.9	3424892	92.9
Microbacterium foliorum 122	GCF002024885	1	3743956	3743956	67.88	3743956	93.75
Microbacterium humi DSM 21799	GCF900105715	2	3356260	3052205	67.29	3052205	95.45
Microbacterium hydrocarbonoxydans DSM 16089	GCF900105205	8	3594871	3519016	68.58	3519016	91.76
Microbacterium oleivorans Wellendorf	GCF001691565	3	2916523	2366086	69.57	2366086	94.6
Microbacterium paludicola CC3	GCF001887285	1	3410829	3410829	70.1	3410829	92.9
Microbacterium paraoxydans DSM 15019	GCF900105335	1	3552213	3552213	70.02	3552213	93.47
Microbacterium pygmaeum DSM 23142	GCF900100885	1	3668570	3668570	68.79	3668570	95.17
Microbacterium testaceum StLB037	GCF000202635	1	3982034	3982034	70.28	3982034	93.75
Microbispora sp ATCC PTA 5024	GCF000511135	7	8393555	2704699	72.33	1715721	96.88
Microcella alkaliphila JAM AC0309	GCF002355395	1	2702837	2702837	68.42	2702837	92.9
Microcella sp HL 107	GCF002813345	1	2259425	2259425	68.36	2259425	93.18
Micrococcaceae bacterium JKS001869	GCF002564125	2	2589943	2474310	72.96	2474310	95.74
Micrococcus luteus NCTC 2665	GCF000023205	1	2501097	2501097	73	2501097	96.02
Micrococcus luteus Okane	GCF001691605	8	2500396	1097402	73.01	583693	95.45
Micrococcus luteus TYU2	GCF002287775	2	2488108	2433670	73.03	2433670	96.02
Microlunatus phosphovorus NM 1	GCF000270245	1	5683123	5683123	67.27	5683123	97.73
Microlunatus soli DSM 21800	GCF900105385	1	6732914	6732914	67.37	6732914	98.3
Micromonospora aurantiaca ATCC 27029	GCF000145235	1	7025559	7025559	72.82	7025559	96.02
Micromonospora aurantiaca DSM 45487	GCF900090255	4	7372783	7245371	72.75	7245371	97.16
Micromonospora auratinigra DSM 44815	GCF900089595	1	6758500	6758500	73.62	6758500	96.02
Micromonospora carbonacea JXNU 1	GCF000876225	3	7626942	4042306	73.86	4042306	97.44
Micromonospora chersina DSM 44151	GCF900091475	2	6683698	6671710	73.57	6671710	97.16
Micromonospora chokoriensis DSM 45160	GCF900091505	1	6897719	6897719	71.46	6897719	97.44
Micromonospora citrea DSM 43903	GCF900090315	2	7209008	7145280	73.82	7145280	97.44
Micromonospora coriariae DSM 44875	GCF900091455	1	6929687	6929687	71.76	6929687	97.16
Micromonospora coxensis DSM 45161	GCF900090295	1	6769693	6769693	73.58	6769693	96.88
Micromonospora cremea DSM 45599	GCF900143515	2	7759716	4853027	71.47	4853027	94.6
Micromonospora eburnea DSM 44814	GCF900090225	2	7185384	7168145	72.12	7168145	96.59
Micromonospora echinaurantiaca DSM 43904	GCF900090235	1	7203133	7203133	73.2	7203133	97.44
Micromonospora echinofusca DSM 43913	GCF900091445	1	7002527	7002527	73.31	7002527	97.44
Micromonospora echinospora DSM 43816	GCF900091495	1	7775486	7775486	72.31	7775486	96.59
Micromonospora inositola DSM 43819	GCF900090285	1	6707994	6707994	72.21	6707994	97.44
Micromonospora inyonensis DSM 46123	GCF900091415	4	6924025	3600009	71.88	3600009	95.74
Micromonospora krabiensis DSM 45344	GCF900091425	1	7074738	7074738	72.81	7074738	95.74
Micromonospora lupini Lupac 08	GCF000297395	4	7320177	7077231	71.96	7077231	96.31
Micromonospora narathiwatensis DSM 45248	GCF900089605	1	6611957	6611957	72.59	6611957	96.59
Micromonospora nigra DSM 43818	GCF900091585	3	6363821	6210698	72.6	6210698	95.74
Micromonospora pallida DSM 43817	GCF900090325	4	7762920	7624653	71.88	7624653	96.88
Micromonospora peucetia DSM 43363	GCF900091625	2	7365824	7269603	72.28	7269603	97.73
Micromonospora purpureochromogenes DSM 43821	GCF900091515	1	6674134	6674134	72.98	6674134	97.16
Micromonospora rhizosphaerae DSM 45431	GCF900091465	3	7181650	7150468	71.61	7150468	96.02
Micromonospora rifamycinica DSM 44983	GCF900090265	1	7011269	7011269	72.99	7011269	96.88
Micromonospora sediminicola DSM 45794	GCF900089585	5	6885777	4643178	73.59	4643178	97.73
Micromonospora siamensis DSM 45097	GCF900090305	1	6250119	6250119	73.2	6250119	96.02
Micromonospora sp ATCC 39149	GCF000158815	4	6494724	6473393	72.32	6473393	90.34
Micromonospora sp CNZ299	GCF002754415	1	7178201	7178201	71.1	7178201	96.31
Micromonospora sp L5	GCF000177655	1	6962533	6962533	72.84	6962533	95.74
Micromonospora sp WMMA2032	GCF002688545	1	6483319	6483319	73.66	6483319	97.16
Micromonospora sp WMMB235	GCF001855515	2	7031348	7016651	72.83	7016651	97.16
Micromonospora viridifaciens DSM 43909	GCF900091545	1	7073885	7073885	72.1	7073885	97.16
Micromonospora yangpuensis DSM 45577	GCF900091615	2	6524354	6499884	72.02	6499884	96.02
Micromonospora zamorensis DSM 45600	GCF900090275	1	7095932	7095932	71.21	7095932	96.31
Microterricola viridarii DSM 21772	GCF900104895	1	3837721	3837721	69.64	3837721	94.89
Mobiluncus curtisii ATCC 43063	GCF000196535	1	2146480	2146480	55.41	2146480	93.18
Modestobacter marinus BC501	GCF000306785	1	5575517	5575517	74.13	5575517	97.44
Mumia flava DSM 27763	GCF002797495	7	4402547	3029243	72	3029243	98.58
Mycobacterium abscessus abscessus 4529	GCF000770215	1	4687494	4687494	64.33	4687494	99.43
Mycobacterium africanum GM041182	GCF000253355	1	4389314	4389314	65.59	4389314	99.15
Mycobacterium asiaticum DSM 44297	GCF000613245	10	5907691	2223272	66.31	1867357	98.3
Mycobacterium aurum liquid	GCF900078775	1	6038730	6038730	68.52	6038730	97.44
Mycobacterium avium 104	GCF000014985	1	5475491	5475491	68.99	5475491	98.86
Mycobacterium bovis BCG Pasteur	GCF001287165	1	4276238	4276238	65.57	4276238	99.15
Mycobacterium canettii CIPT 140010059	GCF000253375	1	4482059	4482059	65.62	4482059	99.43
Mycobacterium caprae Allgaeu	GCF001941665	1	4324639	4324639	65.6	4324639	99.15
Mycobacterium chelonae ATCC 35752	GCF000971805	1	4895233	4895233	63.95	4895233	98.58
Mycobacterium chimaera DSM 44623	GCF002219285	3	6133636	5865671	67.71	5865671	99.43
Mycobacterium chubuense NBB4	GCF000266905	3	6342646	5583723	68.29	5583723	99.72
Mycobacterium colombiense CECT 3035	GCF002105755	1	5581643	5581643	68.09	5581643	97.16
Mycobacterium fortuitum CT6	GCF001307545	1	6254616	6254616	66.22	6254616	98.58
Mycobacterium gilvum Spyr1	GCF000184435	3	5783323	5547768	67.76	5547768	98.86
Mycobacterium goodii X7B	GCF001187505	1	7105878	7105878	67.57	7105878	99.15
Mycobacterium haemophilum DSM 44634 ATCC 29548	GCF000340435	1	4235695	4235695	63.95	4235695	98.58
Mycobacterium immunogenum CCUG 47286	GCF001605725	1	5573781	5573781	64.27	5573781	98.86
Mycobacterium indicus pranii MTCC 9506	GCF000298095	1	5589007	5589007	68.03	5589007	99.43
Mycobacterium intracellulare 1956	GCF000767485	1	5183048	5183048	68.35	5183048	99.72
Mycobacterium kansasii 10MK	GCF002085795	1	6404037	6404037	66.12	6404037	98.86
Mycobacterium leprae Br4923	GCF000026685	1	3268001	3268001	57.8	3268001	93.75
Mycobacterium liflandii 128FXT	GCF000026445	2	6399544	6208955	65.53	6208955	98.86
Mycobacterium litorale F4	GCF002007745	1	6103712	6103712	67.35	6103712	96.88
Mycobacterium marinum M	GCF000018345	2	6660180	6636863	65.73	6636863	99.15
Mycobacterium marseillense FLAC0026	GCF002285715	2	5285670	5266065	67.84	5266065	99.43
Mycobacterium neoaurum VKM Ac 1815D	GCF000317305	1	5421267	5421267	66.89	5421267	99.43
Mycobacterium neworleansense type strain ATCC 49404	GCF001245615	9	6287418	3252810	66.85	3252810	98.3
Mycobacterium paraintracellulare MOTT64	GCF000276825	1	5501090	5501090	68.07	5501090	99.43
Mycobacterium phlei CCUG 21000	GCF001583415	1	5349645	5349645	69.44	5349645	99.43
Mycobacterium rhodesiae NBB3	GCF000230895	1	6415739	6415739	65.49	6415739	99.15
Mycobacterium rutilum DSM 45405	GCF900108565	1	5987831	5987831	68.42	5987831	98.86
Mycobacterium saopaulense EPM10906	GCF001456355	1	4649175	4649175	64.8	4649175	99.15
Mycobacterium shigaense UN 152	GCF002356315	1	5232660	5232660	67.26	5232660	98.86
Mycobacterium simiae ATCC 25275 DSM 44165	GCF000455305	1	5684073	5684073	66.16	5684073	95.74
Mycobacterium sinense JDM601	GCF000214155	1	4643668	4643668	68.37	4643668	99.15
Mycobacterium smegmatis INHR1	GCF000767665	1	6988337	6988337	67.4	6988337	99.72
Mycobacterium stephanolepidis NJB0901	GCF002356335	1	4994485	4994485	63.95	4994485	99.15
Mycobacterium terrae NCTC10856	GCF900187145	1	4532317	4532317	68.43	4532317	98.3
Mycobacterium thermoresistibile NCTC10409	GCF900187065	1	4950685	4950685	68.98	4950685	98.86
Mycobacterium triplex DSM 44626	GCF000689255	4	6379119	5890114	66.6	5890114	98.86
Mycobacterium tuberculosis H37Rv	GCF000195955	1	4411532	4411532	65.61	4411532	98.86
Mycobacterium tusciae JS617	GCF000243415	4	7306202	6945344	65.38	6945344	98.86
Mycobacterium ulcerans shinshuense ATCC 33728	GCF002356495	1	5594076	5594076	65.77	5594076	98.3
Mycobacterium vaccae 95051	GCF001655245	1	6235754	6235754	68.59	6235754	99.15
Mycobacterium vanbaalenii PYR 1	GCF000015305	1	6491865	6491865	67.79	6491865	99.43
Mycobacterium vulneris DSM 45247	GCF000612885	4	6981508	3548984	66.72	3548984	99.43
Mycobacterium yongonense Asan 36912	GCF002148175	1	5445538	5445538	68.02	5445538	99.43
Nakamurella multipartita DSM 44233	GCF000024365	1	6060298	6060298	70.92	6060298	97.73
Nakamurella panacisegetis P4 7 KCTC 19426 CECT 7604	GCF900104535	1	5013870	5013870	68.97	5013870	98.01
Neomicrococcus aestuarii B18	GCF001887245	1	2667837	2667837	59.15	2667837	97.16
Nesterenkonia jeotgali CD08 7	GCF001483765	8	2925253	813278	67.63	731308	94.89
Nigerium massiliense SIT5	GCF000826085	3	2934241	1557167	70.39	1557167	97.16
Nocardia brasiliensis ATCC 700358 HUJEG 1	GCF000250675	1	9436348	9436348	68.05	9436348	98.58
Nocardia cyriacigeorgica GUH 2	GCF000284035	1	6194645	6194645	68.37	6194645	98.58
Nocardia farcinica IFM 10152	GCF000009805	3	6292399	6021269	70.69	6021269	98.58
Nocardia nova SH22a	GCF000523235	1	8348532	8348532	67.77	8348532	98.58
Nocardia seriolae EM150506	GCF001865855	1	8304518	8304518	68.08	8304518	98.01
Nocardia soli Y48	GCF001886715	1	7310115	7310115	68.09	7310115	99.43
Nocardia sp BMG51109	GCF000526215	4	8788067	8533944	68.9	8533944	98.58
Nocardia sp FDAARGOS 372	GCF002554515	2	6464784	6376607	70.64	6376607	98.58
Nocardia terpenica NC YFY NT001	GCF002568625	2	8918596	8847216	68.47	8847216	99.43
Nocardioides dokdonensis FR1436	GCF001653335	1	4376707	4376707	72.26	4376707	98.01
Nocardioides exalbidus DSM 22017	GCF900105585	2	4599858	4509050	71.76	4509050	97.44
Nocardioides sp CF8	GCF000389985	1	4200202	4200202	70.03	4200202	96.02
Nocardioides sp JS614	GCF000015265	2	5293728	4985914	71.44	4985914	98.3
Nocardiopsis alba ATCC BAA 2165	GCF000294515	1	5848211	5848211	69.65	5848211	95.17
Nocardiopsis dassonvillei HZNU N 1	GCF002260685	1	6641645	6641645	72.62	6641645	97.44
Nocardiopsis gilva YIM 90087	GCF002263495	1	6142152	6142152	69.65	6142152	96.31
Nocardiopsis sinuspersici UTMC102	GCF001998325	4	6114596	6066666	71.65	6066666	97.73
Nonomuraea sp ATCC 55076	GCF002057455	1	13047416	13047416	71.81	13047416	96.02
Okibacterium fritillariae VKM Ac 2059	GCF900167575	4	3138267	2068711	67.78	2068711	95.17
Paenarthrobacter aurescens TC1	GCF000014925	3	5226715	4597742	62.43	4597742	97.16
Paraoerskovia marina DSM 22126	GCF900105445	1	2986843	2986843	70.68	2986843	96.31
Parascardovia denticolens DSM 10105 JCM 12538	GCF001042675	1	1890857	1890857	58.31	1890857	87.78
Phycicoccus dokdonensis DSM 22329	GCF900104525	1	3942064	3942064	71.22	3942064	97.73
Phycicoccus sp Root563	GCF001427915	3	4159360	3682755	71.36	3682755	95.45
Phycicoccus sp Soil803	GCF001429685	6	4464462	4398524	70.53	4398524	98.01
Pimelobacter simplex VKM Ac 2033D	GCF000785495	1	5637360	5637360	72.85	5637360	97.16
Planobispora rosea ATCC 53733	GCF001696485	7	8587472	8369242	71.47	8369242	97.44
Plantactinospora sp KBS50	GCF002285795	1	6689726	6689726	72.91	6689726	96.02
Plantibacter cousiniae VKM Ac 1787	GCF900167175	5	4023364	2657885	69.5	2657885	94.32
Plantibacter elymi VKM Ac 1784	GCF900177795	8	4122578	1022365	69.23	674898	93.75
Plantibacter flavus 251	GCF002024505	1	4211582	4211582	69.18	4211582	96.02
Plantibacter sp Leaf1	GCF001421315	6	3891506	2478571	69.7	2478571	94.03
Plantibacter sp Leaf314	GCF001423185	3	3960872	2811828	69.67	2811828	94.32
Prauserella marina DSM 45268	GCF002240355	2	6986469	6851974	67.6	6851974	98.86
Propionibacteriaceae bacterium NML 090529	GCF002250585	9	4476462	1659746	69.46	1062739	97.73
Propionibacterium acnes 266	GCF000213155	1	2494544	2494544	60.03	2494544	96.88
Propionibacterium freudenreichii freudenreichii DSM 20271	GCF000940845	1	2649166	2649166	67.34	2649166	95.74
Propionibacterium sp CC003 HC2	GCF000221085	1	2550549	2550549	60.04	2550549	96.88
Propionibacterium sp KPL2005	GCF000477675	6	2568580	2552813	63.35	2552813	96.59
Propionicimonas paludicola DSM 15597	GCF002563675	1	3262476	3262476	68.16	3262476	95.45
Propionimicrobium lymphophilum ACS 093 V SCH5	GCF000411175	1	2261262	2261262	55.92	2261262	94.89
Propionimicrobium sp BV2F7	GCF000510445	6	2028033	751086	56.08	551509	94.6
Pseudarthrobacter chlorophenolicus A6	GCF900104315	3	5021012	4407916	65.94	4407916	98.58
Pseudarthrobacter equi IMMIB L 1606	GCF900105535	1	4459078	4459078	66.13	4459078	98.58
Pseudarthrobacter phenanthrenivorans Sphe3	GCF000189535	3	4535359	4250446	65.37	4250446	97.16
Pseudarthrobacter sulfonivorans Ar51	GCF001484605	2	5056158	5043757	64.64	5043757	98.3
Pseudonocardia alni DSM 44104	GCF002813375	3	5994851	5686597	74.17	5686597	97.16
Pseudonocardia dioxanivorans CB1190	GCF000196675	3	7304003	7096571	73.22	7096571	96.88
Pseudonocardia sp Ae707 Ps1	GCF001932485	4	6832501	6362016	73.58	6362016	97.16
Pseudonocardia sp AL041005 10	GCF001294605	1	6143341	6143341	74.35	6143341	91.76
Pseudonocardia sp HH130629 09	GCF001294645	2	6300947	6058765	73.49	6058765	98.01
Pseudopropionibacterium propionicum F0230a	GCF000277715	1	3449360	3449360	66.06	3449360	93.47
Quadrisphaera sp DSM 44207	GCF900101335	4	3195678	1280479	76.64	922530	96.59
Rathayibacter sp Leaf296	GCF001423045	4	4012257	2197276	71.83	2197276	92.61
Rathayibacter toxicus 70137	GCF000875675	1	2328253	2328253	61.48	2328253	92.61
Rathayibacter tritici NCPPB 1953	GCF001641005	1	3354681	3354681	69.48	3354681	93.47
Renibacterium salmoninarum ATCC 33209	GCF000018885	1	3155250	3155250	56.27	3155250	96.02
Rhodococcus aetherivorans IcdP1	GCF000982715	1	5922748	5922748	70.62	5922748	97.16
Rhodococcus erythropolis R138	GCF000696675	3	6806559	6236908	62.3	6236908	98.3
Rhodococcus hoagii 103S	GCF000196695	1	5043170	5043170	68.82	5043170	99.15
Rhodococcus jostii RHA1	GCF000014565	4	9702805	7804813	66.98	7804813	98.58
Rhodococcus opacus 1CP	GCF001685605	3	8637358	7687498	67.07	7687498	98.58
Rhodococcus pyridinivorans GF3	GCF002269365	1	5303895	5303895	67.86	5303895	98.58
Rhodococcus rhodochrous NCTC10210	GCF900187265	1	5274756	5274756	68.17	5274756	99.15
Rhodococcus ruber P14	GCF002741725	1	5522075	5522075	70.46	5522075	98.86
Rhodococcus sp WMMA185	GCF001767395	1	4444448	4444448	64.08	4444448	98.86
Rhodoluna lacicola MWH Ta8	GCF000699505	1	1430433	1430433	51.53	1430433	91.19
Rothia mucilaginosa DY 18	GCF000011025	1	2264603	2264603	59.62	2264603	93.18
Saccharomonospora azurea NA 128	GCF000231055	1	4751133	4751133	70.08	4751133	98.01
Saccharomonospora cyanea NA 134	GCF000244975	1	5407798	5407798	69.74	5407798	98.86
Saccharomonospora glauca K62	GCF000243395	2	4562965	4537596	69.13	4537596	98.86
Saccharomonospora marina XMU15	GCF000244955	1	5964771	5964771	68.94	5964771	98.01
Saccharomonospora viridis DSM 43017	GCF000023865	1	4308349	4308349	67.32	4308349	98.3
Saccharomonospora xinjiangensis XJ 54	GCF000258175	2	4774271	4771801	68.95	4771801	98.58
Saccharopolyspora erythraea NRRL 2338 DSM 40517	GCF002564065	1	8230103	8230103	71.14	8230103	97.73
Salinibacterium amurskyense DSM 16400	GCF002797685	4	2776560	1901986	61.88	1901986	94.03
Salinibacterium sp PAMC 21357	GCF000247645	6	3109336	1422949	60.11	679727	91.76
Salinibacterium xinjiangense CGMCC 1.05381	GCF900230175	9	3026444	703321	63.93	605413	94.6
Salinispora arenicola CNS 205	GCF000018265	1	5786361	5786361	69.52	5786361	96.59
Salinispora pacifica DSM 45543	GCF000383995	1	5458028	5458028	69.58	5458028	98.86
Salinispora tropica CNB 440	GCF000016425	1	5183331	5183331	69.46	5183331	98.01
Sanguibacter antarcticus DSM 18966	GCF002564005	1	3521501	3521501	69.17	3521501	98.58
Sanguibacter keddieii DSM 10542	GCF000024925	1	4253413	4253413	71.89	4253413	96.02
Sanguibacter soli DSM 21574	GCF002564025	1	2886687	2886687	71.87	2886687	97.16
Sanguibacter sp Leaf3	GCF001425965	4	4392414	1699347	70.82	1343666	98.01
Scardovia inopinata JCM 12537	GCF001042695	1	1797862	1797862	48.63	1797862	91.48
Scardovia wiggsiae F0424	GCF000269605	1	1550817	1550817	52.93	1550817	89.2
Sediminihabitans luteus DSM 25478	GCF002797595	9	3421867	1303474	73.59	817754	98.01
Segniliparus rotundus DSM 44985	GCF000092825	1	3157527	3157527	66.79	3157527	95.74
Segniliparus rugosus ATCC BAA 974	GCF000185725	2	3587536	2018944	68.2	2018944	93.75
Serinibacter salmoneus DSM 21801	GCF002563925	1	3268715	3268715	71.2	3268715	96.31
Serinicoccus sp JLT9	GCF001685415	1	3597394	3597394	72.43	3597394	96.88
Sinomonas atrocyanea KCTC 3377	GCF001577305	2	4492213	4410241	71.39	4410241	96.88
Sporichthya polymorpha DSM 43042	GCF000384115	1	5496377	5496377	71.41	5496377	95.17
Stackebrandtia nassauensis DSM 44728	GCF000024545	1	6841557	6841557	68.13	6841557	96.88
Streptacidiphilus albus JL83	GCF000744705	1	9915093	9915093	71.77	9915093	98.58
Streptacidiphilus oryzae TH49	GCF000744815	6	7806674	6858189	73.36	6858189	98.58
Streptacidiphilus rugosus AM 16	GCF000744655	4	9002983	7115534	71.8	7115534	98.3
Streptomyces agglomeratus 5 1 3	GCF001746465	10	9514204	8101345	70.39	8101345	98.58
Streptomyces agglomeratus 5 1 8	GCF001746485	3	7088009	7047707	70.81	7047707	98.86
Streptomyces agglomeratus 5 2 6	GCF001746475	5	9018251	8348117	70.44	8348117	98.86
Streptomyces agglomeratus 6 3 2	GCF001746415	5	9128785	8325022	70.43	8325022	98.58
Streptomyces agglomeratus 9 3 15	GCF001746455	6	8961303	8140952	70.5	8140952	99.15
Streptomyces albireticuli SMD11	GCF002192455	1	8144417	8144417	72.82	8144417	98.58
Streptomyces alboflavus MDJK44	GCF002189675	3	9967567	9622415	72	9622415	97.73
Streptomyces albulus NK660	GCF000695235	2	9372410	9360281	72.32	9360281	99.15
Streptomyces albulus ZPM	GCF000963515	1	9784577	9784577	72.13	9784577	98.86
Streptomyces albus BK3 25	GCF001753425	1	8308430	8308430	72.64	8308430	98.86
Streptomyces albus DSM 41398	GCF000827005	1	8384669	8384669	72.64	8384669	98.86
Streptomyces albus J1074	GCF000156475	2	6605486	6595646	73.14	6595646	96.88
Streptomyces albus J1074	GCF000359525	1	6841649	6841649	73.32	6841649	99.43
Streptomyces albus SM254	GCF001577385	1	7170504	7170504	73.34	7170504	99.43
Streptomyces ambofaciens ATCC 23877	GCF001267885	2	8393709	8304051	72.19	8304051	98.86
Streptomyces ambofaciens DSM 40697	GCF001632865	1	8137876	8137876	72.33	8137876	98.86
Streptomyces antibioticus DSM 41481	GCF002019855	5	8476801	8450861	71.9	8450861	99.72
Streptomyces anulatus ATCC 11523	GCF001434355	2	8844412	8756882	71.74	8756882	99.43
Streptomyces autolyticus CGMCC0516	GCF001983975	8	10184763	10029089	71.21	10029089	98.86
Streptomyces avermitilis MA 4680 NBRC 14893	GCF000009765	2	9119906	9025608	70.7	9025608	98.86
Streptomyces bingchenggensis BCW 1	GCF000092385	1	11936683	11936683	70.75	11936683	98.3
Streptomyces bottropensis ATCC 25435	GCF000383595	1	8955306	8955306	71.19	8955306	98.58
Streptomyces cattleya NRRL 8057 DSM 46488	GCF000237305	2	8092577	6283062	73.01	6283062	98.58
Streptomyces cattleya NRRL 8057 DSM 46488	GCF000240165	2	8095565	6283017	73.01	6283017	98.3
Streptomyces clavuligerus ATCC 27064	GCF000148465	5	9132409	6734652	72.39	6734652	99.43
Streptomyces clavuligerus ATCC 27064	GCF000163875	2	8520420	6728635	72.49	6728635	98.58
Streptomyces clavuligerus F613 1	GCF001693675	2	7589811	6882745	72.61	6882745	98.86
Streptomyces coelicolor A32	GCF000203835	3	9054873	8667507	72	8667507	98.86
Streptomyces collinus Tu 365	GCF000444875	3	8377326	8272956	72.55	8272956	98.86
Streptomyces cyaneogriseus noncyanogenus NMWT 1	GCF000931445	1	7762396	7762396	72.86	7762396	98.58
Streptomyces davaonensis JCM 4913	GCF000349325	2	9554549	9465218	70.58	9465218	98.58
Streptomyces formicae KY5	GCF002556545	1	9611874	9611874	71.38	9611874	99.15
Streptomyces fulvissimus DSM 40593	GCF000385945	1	7905758	7905758	71.48	7905758	99.43
Streptomyces gilvosporeus F607	GCF002082195	1	8482298	8482298	70.95	8482298	99.15
Streptomyces glaucescens GLA.O	GCF000761215	2	7623777	7453200	72.91	7453200	99.15
Streptomyces globisporus C 1027	GCF000261345	3	7783702	7608699	71.54	7608699	99.43
Streptomyces griseochromogenes ATCC 14511	GCF001542625	1	10764674	10764674	70.76	10764674	98.58
Streptomyces griseoflavus Tu4000	GCF000158975	1	7336490	7336490	71.66	7336490	94.32
Streptomyces griseofuscus NG1 7	GCF002114065	3	8577684	6506233	71.64	6506233	99.15
Streptomyces griseorubens JSD 1	GCF000709915	2	7593023	7487493	72.4	7487493	98.3
Streptomyces griseus DSM 40236	GCF900105705	4	8630261	5992014	72.25	5992014	99.43
Streptomyces griseus griseus NBRC 13350	GCF000010605	1	8545929	8545929	72.23	8545929	98.86
Streptomyces himastatinicus ATCC 53653	GCF000158915	2	10442880	10360494	71.21	10360494	92.61
Streptomyces hygroscopicus jinggangensis 5008	GCF000245355	3	10383756	10145891	71.84	10145891	98.86
Streptomyces hygroscopicus jinggangensis TL01	GCF000340845	3	10078083	9840226	71.98	9840226	98.86
Streptomyces hygroscopicus limoneus KCTC 1717	GCF001447075	2	10537966	8648026	71.96	8648026	98.86
Streptomyces hygroscopicus XM201	GCF002021875	1	12012215	12012215	70.75	12012215	98.58
Streptomyces iranensis	GCF000938975	7	12122729	11949139	70.9	11949139	98.01
Streptomyces kasugaensis BCRC 12349	GCF002261115	5	9253340	5068354	71.4	5068354	99.15
Streptomyces katrae S3 4	GCF002028425	3	8056418	7504810	72.73	7504810	98.58
Streptomyces lavendulae lavendulae CCM 3239	GCF002803845	2	8932799	8691711	72.62	8691711	98.01
Streptomyces leeuwenhoekii C34 DSM 42122 NRRL B 24963	GCF001013905	3	8122603	7904000	72.68	7904000	98.01
Streptomyces lincolnensis NRRL 2936	GCF001685355	1	10319054	10319054	71.01	10319054	99.43
Streptomyces lividans 1326	GCF000403665	1	8406048	8406048	72.16	8406048	98.86
Streptomyces lividans TK24	GCF000158935	1	8181178	8181178	72.17	8181178	98.3
Streptomyces lividans TK24	GCF000739105	1	8345283	8345283	72.24	8345283	99.72
Streptomyces lydicus 103	GCF001729485	1	8201357	8201357	72.22	8201357	99.43
Streptomyces lydicus A02	GCF000952035	1	9307519	9307519	70.68	9307519	99.43
Streptomyces lydicus GS93 23	GCF001984445	1	8243179	8243179	72.01	8243179	99.15
Streptomyces malaysiensis DSM 4137	GCF002591335	2	10744303	10694750	71.09	10694750	98.86
Streptomyces melanosporofaciens DSM 40318	GCF900105695	2	10769740	10257104	71.02	10257104	98.3
Streptomyces misionensis DSM 40306	GCF900104815	5	8473750	8162950	72.38	8162950	99.43
Streptomyces niveus NCIMB 11891	GCF000497425	5	8561394	8355532	70.7	8355532	99.15
Streptomyces niveus SCSIO 3406	GCF002009175	1	7990492	7990492	70.46	7990492	99.43
Streptomyces nodosus ATCC 14899	GCF000819545	1	7701566	7701566	70.88	7701566	98.86
Streptomyces noursei ATCC 11455	GCF001704275	1	9815884	9815884	71.45	9815884	98.86
Streptomyces pactum ACT12	GCF002005225	1	8550793	8550793	72.06	8550793	98.58
Streptomyces pactum KLBMP 5084	GCF001767375	1	8180260	8180260	72.41	8180260	98.3
Streptomyces parvulus 2297	GCF001660045	2	7766626	7149541	72.73	7149541	98.58
Streptomyces peucetius caesius ATCC 27952	GCF002777535	1	8021274	8021274	70.59	8021274	98.3
Streptomyces pluripotens MUSC 135	GCF000802245	1	7346075	7346075	69.94	7346075	99.15
Streptomyces pluripotens MUSC 137	GCF000816465	1	7586568	7586568	69.92	7586568	99.15
Streptomyces pratensis ATCC 33331	GCF000176115	3	7656123	7337497	70.99	7337497	98.58
Streptomyces pristinaespiralis ATCC 25486	GCF000154945	1	7608526	7608526	71.15	7608526	94.32
Streptomyces pristinaespiralis HCCB 10218	GCF001278075	1	8532592	8532592	71.54	8532592	98.3
Streptomyces puniciscabiei TW1S1	GCF001735805	1	9698948	9698948	71.09	9698948	97.44
Streptomyces purpureus KA281	GCF000384175	1	7454329	7454329	71.52	7454329	98.86
Streptomyces rapamycinicus NRRL 5491	GCF003675955	4	12663199	6854462	71.04	6854462	98.86
Streptomyces reticuli TUE45	GCF001511815	4	9336352	8354021	72.72	8354021	98.86
Streptomyces roseochromogenus oscitans DS 12.976	GCF000497445	2	9533440	9415369	70.51	9415369	98.01
Streptomyces roseosporus NRRL 11379	GCF000156695	1	7783342	7783342	71.39	7783342	98.58
Streptomyces roseosporus NRRL 15998	GCF000156455	1	7549806	7549806	71.36	7549806	98.86
Streptomyces rubrolavendulae MJM4426	GCF001750785	1	6543262	6543262	74.78	6543262	98.86
Streptomyces sampsonii KJ40	GCF001704195	1	7070328	7070328	73.39	7070328	98.86
Streptomyces sampsonii KJ40	GCF001865315	9	7218776	7139410	73.41	7139410	98.86
Streptomyces scabiei 87.22	GCF000091305	1	10148695	10148695	71.45	10148695	98.01
Streptomyces scabrisporus NF3	GCF002024165	8	10958491	7005355	71.61	7005355	97.73
Streptomyces silaceus ACCC40021	GCF001975025	1	8625867	8625867	72.09	8625867	98.86
Streptomyces sp 1	GCF002754615	3	8399209	8173973	73.24	8173973	98.58
Streptomyces sp 1121.2	GCF002754515	4	10155193	6485555	70.56	6485555	98.01
Streptomyces sp 1222.2	GCF900215595	2	9514706	9478696	71.3	9478696	98.01
Streptomyces sp 1222.5	GCF900105245	2	8852372	8662163	71.92	8662163	99.15
Streptomyces sp 1331.2	GCF900199205	3	8427470	7624482	72.9	7624482	98.86
Streptomyces sp 150FB	GCF000818195	8	9434519	9264849	70.15	9264849	97.73
Streptomyces sp 2112.2	GCF900104865	3	8377266	8313699	71.13	8313699	99.72
Streptomyces sp 2112.3	GCF900105775	2	8080563	7805832	71.02	7805832	98.86
Streptomyces sp 2114.2	GCF900104935	1	8620163	8620163	72.12	8620163	99.15
Streptomyces sp 2114.4	GCF900187385	2	8074240	7982164	71.03	7982164	99.15
Streptomyces sp 2131.1	GCF900105515	3	7489266	7224497	71.65	7224497	98.58
Streptomyces sp 2133.1	GCF900105235	2	8130520	8039237	70.99	8039237	99.15
Streptomyces sp 2224.1	GCF900105915	5	8000865	4114806	71.05	4114806	99.15
Streptomyces sp 2231.1	GCF900105605	3	9263521	8816996	71.67	8816996	98.86
Streptomyces sp 2314.4	GCF900105525	2	8345248	4749209	71.1	4749209	99.72
Streptomyces sp 2323.1	GCF900221035	1	8212355	8212355	71.19	8212355	99.72
Streptomyces sp 2333.5	GCF002797835	1	8230569	8230569	71.19	8230569	99.72
Streptomyces sp 31246	GCF900129855	1	9375451	9375451	70.67	9375451	98.3
Streptomyces sp 3211 3	GCF002028385	3	8991390	8232317	71.5	8232317	98.3
Streptomyces sp 3213	GCF900105265	2	10923901	10914512	70.13	10914512	99.15
Streptomyces sp 4121.5	GCF002813165	3	8326230	5345381	74.04	5345381	99.15
Streptomyces sp 4F	GCF001484705	1	8047771	8047771	72.28	8047771	99.15
Streptomyces sp 61	GCF002754535	2	8424745	8055060	72.29	8055060	98.3
Streptomyces sp 69	GCF002813405	5	8720976	8110907	71.01	8110907	98.3
Streptomyces sp 70	GCF002754715	2	10926050	10823873	70.21	10823873	98.58
Streptomyces sp 76	GCF002754435	4	8227224	3666124	71.98	2049341	98.86
Streptomyces sp 769	GCF000816025	2	10338299	10100774	71.6	10100774	98.58
Streptomyces sp 93	GCF002754595	1	11991619	11991619	70.11	11991619	98.01
Streptomyces sp 94	GCF002754555	1	11368563	11368563	70.21	11368563	98.58
Streptomyces sp AA4	GCF000158875	4	9149402	8450561	69.79	8450561	97.44
Streptomyces sp ACT 1 XylebKG 1	GCF000177175	2	8731603	8727687	72.11	8727687	98.86
Streptomyces sp Ag109 G2 1	GCF002813225	6	8325992	5975151	72.67	5975151	97.73
Streptomyces sp Ag109 G2 15	GCF900215565	2	10184517	8068055	71.05	8068055	97.73
Streptomyces sp Ag109 O5 10	GCF900105755	2	9458112	9394050	71.47	9394050	99.15
Streptomyces sp Ag82 G6 1	GCF900215615	2	8434188	8400754	71.32	8400754	98.86
Streptomyces sp Ag82 O1 15	GCF002300485	2	11734162	11703281	70.13	11703281	99.43
Streptomyces sp CCM MD2014	GCF000772045	1	8274043	8274043	72.13	8274043	98.01
Streptomyces sp CdTB01	GCF001484565	2	10191582	9902731	71.53	9902731	98.3
Streptomyces sp CFMR 7 CFMR 7	GCF001278095	2	8307284	8207742	72.03	8207742	98.58
Streptomyces sp CLI2509 CLI2905	GCF002288075	2	7232787	7088759	73.3	7088759	98.01
Streptomyces sp CNQ 509	GCF001011035	1	8039318	8039318	73.07	8039318	99.15
Streptomyces sp CNZ279	GCF002754675	2	7971803	7907086	71.15	7907086	96.88
Streptomyces sp CNZ306	GCF002797655	5	8549680	4549905	73.47	4549905	99.72
Streptomyces sp CS057	GCF002188345	2	8348313	8331047	71.75	8331047	98.58
Streptomyces sp CS113	GCF002188365	3	8714431	8684308	72.28	8684308	98.58
Streptomyces sp CS159	GCF002188335	6	8394643	8117614	72.26	8117614	98.3
Streptomyces sp CS227	GCF002188355	5	7053574	6789882	73.39	6789882	99.43
Streptomyces sp FBKL.4005	GCF002251155	7	9442009	8910213	72.72	8910213	98.86
Streptomyces sp fd1 xmd	GCF002007685	1	7929999	7929999	72.51	7929999	98.58
Streptomyces sp FR 008	GCF001431765	3	7258131	7091042	73.32	7091042	98.86
Streptomyces sp GBA 94 10	GCF000495635	2	7220949	7022512	72.99	7022512	99.43
Streptomyces sp HGB0020	GCF000411315	9	9338328	2936292	70.72	2199062	98.86
Streptomyces sp KS 16	GCF900102245	2	8068846	7976785	71.03	7976785	99.15
Streptomyces sp KS 5	GCF900105275	2	10344478	9065991	70.87	9065991	98.3
Streptomyces sp M412017	GCF002078175	5	9023819	5868440	71.38	5868440	99.43
Streptomyces sp M56	GCF002812405	1	11742376	11742376	70.99	11742376	98.58
Streptomyces sp Mg1	GCF000412265	4	8716109	7868087	72.13	7868087	98.3
Streptomyces sp MJM8645	GCF001625365	5	9234569	7349703	72.82	7349703	98.58
Streptomyces sp MNU77	GCF000935135	4	8868379	8219841	71.7	8219841	98.58
Streptomyces sp MOE7	GCF002090335	1	8399509	8399509	71.99	8399509	98.86
Streptomyces sp MP131 18	GCF001984575	10	7806672	7719418	72.42	7719418	98.86
Streptomyces sp NTK 937	GCF000698495	3	7444933	7003216	71.9	7003216	99.15
Streptomyces sp OK228	GCF900215305	2	12153016	12053667	70.2	12053667	98.86
Streptomyces sp OV198	GCF900230275	4	11619432	9898512	70.15	9898512	98.86
Streptomyces sp PAMC 26508	GCF000364805	2	7630350	7526302	71.03	7526302	98.86
Streptomyces sp PAN FS17	GCF900105465	2	10467988	10129828	70.83	10129828	99.15
Streptomyces sp PVA 94 07	GCF000495755	3	7103748	7005098	73.07	7005098	99.43
Streptomyces sp RTd22	GCF001650215	1	11142275	11142275	71.28	11142275	97.73
Streptomyces sp S102016	GCF001611795	1	9083372	9083372	71.26	9083372	99.15
Streptomyces sp S8	GCF002094995	2	7601941	7529152	72.29	7529152	98.3
Streptomyces sp SAT1	GCF001654495	1	7472530	7472530	73.15	7472530	99.43
Streptomyces sp SCSIO 03032	GCF002128305	1	6287975	6287975	73.52	6287975	98.01
Streptomyces sp Sge12	GCF002080455	2	8110785	7983700	72.17	7983700	98.3
Streptomyces sp SirexAA E	GCF000177195	1	7414440	7414440	71.75	7414440	98.58
Streptomyces sp SPB074	GCF000154905	2	6480941	6318956	72.99	6318956	94.32
Streptomyces sp SPB78	GCF000158855	4	6877451	6844383	72.89	6844383	92.61
Streptomyces sp SS07	GCF002217715	3	7603831	7594133	71.66	7594133	99.43
Streptomyces sp TLI 053	GCF900105395	1	9899953	9899953	73.63	9899953	98.01
Streptomyces sp TLI 105	GCF900105415	2	8876303	8586973	72.15	8586973	98.3
Streptomyces sp TLI 55	GCF900206255	10	10204263	9395536	70.76	9395536	98.86
Streptomyces sp TN58	GCF001941845	1	7585034	7585034	72.3	7585034	98.3
Streptomyces sp TSRI0395	GCF001905525	10	8656635	2682082	71.74	1367304	98.86
Streptomyces sp Tu6071	GCF000213055	2	7506620	7359264	73.08	7359264	98.86
Streptomyces sp Tue 6075 Tue6075	GCF001931635	1	7931741	7931741	71.57	7931741	98.86
Streptomyces sp WAC04657	GCF001592685	5	7761697	4907722	72.77	4907722	98.01
Streptomyces sp Wb2n 11	GCF001049855	5	8228223	7583174	71.03	7583174	98.01
Streptomyces subrutilus 10 1 1	GCF001746425	6	8094102	7295440	72.11	7295440	98.58
Streptomyces sviceus ATCC 29083	GCF000154965	1	9039247	9039247	70.46	9039247	96.02
Streptomyces thermoautotrophicus H1	GCF001543925	7	4581238	4464660	70.98	4464660	94.03
Streptomyces thermolilacinus SPC6	GCF000478605	6	6445271	6421573	73.38	6421573	98.86
Streptomyces venezuelae ATCC 10712	GCF000253235	1	8211258	8211258	72.48	8211258	98.86
Streptomyces venezuelae ATCC 15439	GCF001406115	1	9034396	9034396	71.75	9034396	97.44
Streptomyces venezuelae ATCC 15439	GCF001443625	1	9054773	9054773	71.74	9054773	98.58
Streptomyces venezuelae NRRL B 65442	GCF001886595	2	8380407	8222285	72.42	8222285	98.86
Streptomyces vietnamensis GIM4.0001	GCF000830005	2	9153794	8867142	71.99	8867142	99.43
Streptomyces violaceoruber S21	GCF002082175	1	7916045	7916045	72.65	7916045	99.15
Streptomyces violaceusniger Tu 4113	GCF000147815	3	11138389	10657176	70.88	10657176	98.58
Streptomyces viridifaciens DSM 40239	GCF001888885	4	9502723	7789353	72.2	7789353	98.01
Streptomyces viridochromogenes DSM 40736	GCF000158955	1	8541020	8541020	71.12	8541020	98.86
Streptomyces viridosporus ATCC 14672	GCF000156435	3	8205256	7959390	72.21	7959390	97.44
Streptomyces viridosporus T7A	GCF000316095	6	8274211	6481611	72.5	6481611	98.58
Streptomyces xiamenensis 318	GCF000993785	1	5961401	5961401	72.02	5961401	97.16
Streptomyces xinghaiensis S187	GCF000220705	1	7137891	7137891	73.14	7137891	98.3
Streptomyces yeochonensis CN732	GCF000745345	6	7819537	4825726	73.56	4825726	98.86
Streptosporangium roseum DSM 43021	GCF000024865	2	10369525	10341314	70.86	10341314	97.16
Tessaracoccus flavescens SST 39T	GCF001998865	2	3650803	3603840	68.24	3603840	94.32
Tessaracoccus flavus RP1T	GCF001997295	1	3222890	3222890	67.93	3222890	95.45
Tetrasphaera australiensis Ben110	GCF001050535	1	4197250	4197250	68.98	4197250	88.64
Tetrasphaera elongata Lp2	GCF000367525	1	3152583	3152583	68.98	3152583	93.75
Tetrasphaera japonica T1 X7	GCF001046855	1	5106441	5106441	71.49	5106441	95.74
Tetrasphaera jenkinsii Ben 74	GCF001046875	1	3782361	3782361	68.24	3782361	96.31
Tetrasphaera sp Soil756	GCF001428065	9	3464353	1440527	73.31	684740	96.59
Thermobifida fusca YX	GCF000012405	1	3642249	3642249	67.5	3642249	96.02
Thermobispora bispora DSM 43833	GCF000092645	1	4189976	4189976	72.43	4189976	96.31
Thermomonospora chromogena DSM 43794	GCF900099985	2	5988056	5926032	70.98	5926032	96.59
Thermomonospora curvata DSM 43183	GCF000024385	1	5639016	5639016	71.64	5639016	97.16
Timonella senegalensis JC301 JC301	GCF000312125	6	2984308	1049725	61.43	721794	96.59
Trueperella pyogenes 2012CQ ZSH	GCF001281085	1	2295822	2295822	59.67	2295822	93.18
Tsukamurella paurometabola DSM 20162	GCF000092225	2	4479731	4379918	68.4	4379918	98.86
Tsukamurella pulmonis DSM 44142	GCF900103175	2	4783096	4721623	70.88	4721623	97.16
Tsukamurella sp 1534	GCF000312385	4	4484805	2512349	71.12	2512349	98.01
Tsukamurella tyrosinosolvens DSM 44234	GCF900104775	4	5281165	4948358	71.05	4948358	97.16
Tsukamurella tyrosinosolvens PS2	GCF001623895	9	4840694	1763076	71.32	1229913	98.01
Turicella otitidis ATCC 51513	GCF000296405	6	2088312	649424	71.37	592071	95.17
Varibaculum cambriense DSM 15806	GCF000420065	10	2023023	1161676	53.43	1161676	92.33
Varibaculum sp Marseille P2802	GCF900106855	4	2283389	2279317	53	2279317	89.77
Verrucosispora maris NRRL B 24793	GCF001507315	2	6673973	4308966	70.85	4308966	96.02
Verrucosispora sp CNZ293	GCF002754655	1	6585081	6585081	70.96	6585081	97.16
Xylanimonas cellulosilytica DSM 15894	GCF000024965	2	3831387	3742776	72.45	3742776	98.58
Yaniella halotolerans DSM 15476	GCF000420805	6	2775513	1588012	55.65	1588012	94.03
Yonghaparkia sp Root332	GCF001425665	2	2632063	1616282	71.75	1616282	93.18
Yonghaparkia sp Soil809	GCF001429705	2	2587470	1575599	71.9	1575599	91.76
