# Supplementary material for: The natural product co-evolved pyrroloquinoline quinone gene enhances their production when heterologously expressed in a variety of Streptomycetes
Source: Research Square preprint supplement (doi:10.21203/rs.3.rs-2734079/v1), 2023-04-04
Supplement: Supplementary file 3 [file e506a7a36478a3d3c4567a07.xlsx]

## Sheet: Sheet1
Category	Class	Function
Aminoacid metabolism	Alanine, aspartate and glutamate metabolism	Gamma-aminobutyrate:alpha-ketoglutarate aminotransferase (EC 2.6.1.19)
Aminoacid metabolism	Arginine and proline metabolism	Creatinine amidohydrolase (EC 3.5.2.10)
Aminoacid metabolism	Arginine and proline metabolism	N-methylhydantoinase (ATP-hydrolyzing) (EC 3.5.2.14)
Aminoacid metabolism	Glycine, serine and threonine metabolism	D-3-phosphoglycerate dehydrogenase (EC 1.1.1.95)
Aminoacid metabolism	Histidine metabolism	N-formylglutamate deformylase (EC 3.5.1.68)
Aminoacid metabolism	Tryptophan metabolism	Kynurenine 3-monooxygenase (EC 1.14.13.9)
Cazymes	Cazyme	Chitinase (EC 3.2.1.14)
Cazymes	Cazyme	Chitinase (EC 3.2.1.14)
Cazymes	Cazyme	Endo-1,4-beta-xylanase A precursor (EC 3.2.1.8)
Cazymes	Cazyme	Endoglucanase (EC 3.2.1.4)
Cazymes	Cazyme	Endoglucanase (EC 3.2.1.4) (Endo-1,4-beta-glucanase) (Cellulase)
Cazymes	Cazyme	Endoglucanase A precursor (EC 3.2.1.4) (Endo-1,4-beta-glucanase A) (Cellulase A)
Cazymes	Cazyme	glycosyl hydrolase
Cazymes	Cazyme	glycosyl hydrolase (secreted protein)
Cazymes	Cazyme	glycosyl transferase, family 2
Cazymes	Cazyme	Glycosyl transferase
Cazymes	Cazyme	Multicopper oxidase
Cazymes	Cazyme	2-dehydro-3-deoxygluconate kinase (EC 2.7.1.45)
Cazymes	Cazyme	Alpha-glucosides-binding periplasmic protein AglE precursor
Cazymes	Cazyme	Alpha-L-fucosidase (EC 3.2.1.51)
Cazymes	Cazyme	Beta-galactosidase (EC 3.2.1.23)
Cazymes	Cazyme	D-mannonate oxidoreductase (EC 1.1.1.57)
Cazymes	Cazyme	Dolichol-phosphate mannosyltransferase (EC 2.4.1.83) homolog
Cazymes	Cazyme	Dolichol-phosphate mannosyltransferase (EC 2.4.1.83) in lipid-linked oligosaccharide synthesis cluster
Cazymes	Cazyme	Myo-inositol 2-dehydrogenase (EC 1.1.1.18)
Cazymes	Cazyme	Myo-inositol 2-dehydrogenase 1 (EC 1.1.1.18)
Cazymes	CAzyme	rhamnogalacturonan acetylesterase
Cazymes	CAzyme	Rhamnogalacturonides degradation protein RhiN
Cazymes	Cazyme	secreted sugar hydrolase
Cazymes	Cazyme	secreted transglycosylase
Cazymes	Cazyme	UDP-glucose 4-epimerase (EC 5.1.3.2)
Cazymes	Cazyme	UDP-glucose 4-epimerase (EC 5.1.3.2)
Cazymes	Cazyme	Xylulose kinase (EC 2.7.1.17)
Cazymes	Cazyme	Nucleoside-diphosphate-sugar epimerases
Cazymes	Cazyme	secreted cellulose-binding protein
Cazymes	Cazyme	secreted pectate lyase
Cazymes	Cazymes	Sorbitol dehydrogenase (EC 1.1.1.14)
Cell division, Cell wall biosynthesis, replication	Cell division	FtsK/SpoIIIE family protein
Cell division, Cell wall biosynthesis, replication	Cell dvision	Cell division protein FtsL
Cell division, Cell wall biosynthesis, replication	Cell dvision	Chromosome initiation inhibitor
Cell division, Cell wall biosynthesis, replication	Cell wall biosynthesis	D-alanyl-D-alanine carboxypeptidase (EC 3.4.16.4)
Cell division, Cell wall biosynthesis, replication	Cell wall biosynthesis	D-alanyl-D-alanine carboxypeptidase (EC 3.4.16.4)
Cell division, Cell wall biosynthesis, replication	Cell wall biosynthesis	D-alanyl-D-alanine carboxypeptidase (EC 3.4.16.4)
Cell division, Cell wall biosynthesis, replication	Cell wall biosynthesis	D-alanyl-D-alanine dipeptidase (EC 3.4.13.-)
Cell division, Cell wall biosynthesis, replication	Cell wall biosynthesis	teichoic acid biosynthesis protein C
Cell division, Cell wall biosynthesis, replication	Cell wall biosynthesis	UDP-N-acetylmuramic acid hydroxylase
Cell division, Cell wall biosynthesis, replication, translation	Replication	DNA polymerase X family
Cell division, Cell wall biosynthesis, replication, translation	Replication	DNA repair protein RecN
Cell division, Cell wall biosynthesis, replication, translation	Ribosome	Arginyl-tRNA synthetase (EC 6.1.1.19)
Cell division, Cell wall biosynthesis, replication, translation	Ribosome	Cys-tRNA(Pro) deacylase YbaK
Cell division, Cell wall biosynthesis, replication, translation	Ribosome	Protein-N(5)-glutamine methyltransferase PrmC, methylates polypeptide chain release factors RF1 and RF2
Cell division, Cell wall biosynthesis, replication, translation	Ribosome	alpha-L-glutamate ligases, RimK family
Cell division, Cell wall biosynthesis, replication, translation	Ribosome	alpha-L-glutamate ligases, RimK family
Coenzyme	Co enzyme B6 biosynthesis	2-(acetamidomethylene)succinate hydrolase (EC 3.5.1.29)
Coenzyme	Co-enzyme Q	2-polyprenyl-6-methoxyphenol hydroxylase and related FAD-dependent oxidoreductases
Coenzyme	Co-enzyme Q	3-demethylubiquinone-9 3-methyltransferase (EC 2.1.1.64)
Coenzyme	Folate biosynthesis	Aminodeoxychorismate lyase (EC 4.1.3.38)
Coenzyme	Folate biosynthesis	Coenzyme F420-dependent N5 N10-methylene tetrahydromethanopterin reductase
Coenzyme	PQQ	Coenzyme PQQ synthesis protein B
Coenzyme	PQQ	Coenzyme PQQ synthesis protein D
Coenzyme	PQQ	Coenzyme PQQ synthesis protein E
Coenzyme	PQQ	PQQ-dependent oxidoreductase, gdhB family
Coenzyme	PQQ	Pyrroloquinoline-quinone synthase (EC 1.3.3.11)
Coenzyme	Vitamin B6 metabolism	4-hydroxythreonine-4-phosphate dehydrogenase (EC 1.1.1.262)
Coenzyme	Vitamin B6 metabolism	Threonine synthase (EC 4.2.3.1)
FAS, Lipids and polyketides metabolism	FAS/PKS	3-hydroxyacyl-[acyl-carrier-protein] dehydratase, FabZ form (EC 4.2.1.59)
FAS, Lipids and polyketides metabolism	FAS/PKS	3-oxoacyl-[acyl-carrier protein] reductase (EC 1.1.1.100)
FAS, Lipids and polyketides metabolism	FAS/PKS	3-oxoacyl-[acyl-carrier protein] reductase (EC 1.1.1.100)
FAS, Lipids and polyketides metabolism	FAS/PKS	3-oxoacyl-[acyl-carrier protein] reductase (EC 1.1.1.100)
FAS, Lipids and polyketides metabolism	FAS/PKS	3-oxoacyl-[acyl-carrier protein] reductase (EC 1.1.1.100)
FAS, Lipids and polyketides metabolism	FAS/PKS	3-oxoacyl-[acyl-carrier protein] reductase (EC 1.1.1.100)
FAS, Lipids and polyketides metabolism	FAS/PKS	3-oxoacyl-[acyl-carrier protein] reductase (EC 1.1.1.100)
FAS, Lipids and polyketides metabolism	FAS/PKS	3-oxoacyl-[acyl-carrier-protein] synthase, KASII (EC 2.3.1.179)
FAS, Lipids and polyketides metabolism	FAS/PKS	3-oxoacyl-[acyl-carrier-protein] synthase, KASII (EC 2.3.1.179)
FAS, Lipids and polyketides metabolism	FAS/PKS	3-oxoacyl-[acyl-carrier-protein] synthase, KASII (EC 2.3.1.179)
FAS, Lipids and polyketides metabolism	FAS/PKS	3-oxoacyl-[acyl-carrier-protein] synthase, KASII (EC 2.3.1.179)
FAS, Lipids and polyketides metabolism	FAS/PKS	3-oxoacyl-[acyl-carrier-protein] synthase, KASII (EC 2.3.1.179)
FAS, Lipids and polyketides metabolism	FAS/PKS	3-oxoacyl-ACP synthase I
FAS, Lipids and polyketides metabolism	FAS/PKS	Acyl carrier protein
FAS, Lipids and polyketides metabolism	FAS/PKS	Acyl carrier protein
FAS, Lipids and polyketides metabolism	FAS/PKS	Acyl carrier protein
FAS, Lipids and polyketides metabolism	FAS/PKS	Acyl-CoA dehydrogenase; probable dibenzothiophene desulfurization enzyme
FAS, Lipids and polyketides metabolism	FAS/PKS	Acyl-CoA synthetases (AMP-forming)/AMP-acid ligases
FAS, Lipids and polyketides metabolism	FAS/PKS	Long-chain-fatty-acid--CoA ligase (EC 6.2.1.3)
FAS, Lipids and polyketides metabolism	FAS/PKS	Malonyl CoA-acyl carrier protein transacylase (EC 2.3.1.39)
FAS, Lipids and polyketides metabolism	FAS/PKS	Malonyl CoA-acyl carrier protein transacylase (EC 2.3.1.39)
FAS, Lipids and polyketides metabolism	FAS/PKS	Malonyl CoA-acyl carrier protein transacylase (EC 2.3.1.39)
FAS, Lipids and polyketides metabolism	FAS/PKS	Malonyl CoA-acyl carrier protein transacylase (EC 2.3.1.39)
FAS, Lipids and polyketides metabolism	FAS/PKS	Malonyl CoA-acyl carrier protein transacylase (EC 2.3.1.39)
FAS, Lipids and polyketides metabolism	FAS/PKS	Malonyl CoA-acyl carrier protein transacylase (EC 2.3.1.39)
FAS, Lipids and polyketides metabolism	FAS/PKS	Malonyl CoA-acyl carrier protein transacylase (EC 2.3.1.39)
FAS, Lipids and polyketides metabolism	FAS/PKS	Malonyl CoA-acyl carrier protein transacylase (EC 2.3.1.39)
FAS, Lipids and polyketides metabolism	FAS/PKS	putative hydrolase (alpha/beta fold family)
FAS, Lipids and polyketides metabolism	FAS/PKS	TesB-like acyl-CoA thioesterase 5
FAS, Lipids and polyketides metabolism	FAS/PKS	alpha/beta hydrolase fold
FAS, Lipids and polyketides metabolism	FAS/PKS precursorand regulation	Regulator of polyketide synthase expression
FAS, Lipids and polyketides metabolism	FAS/PKS precursorand regulation	4'-phosphopantetheinyl transferase (EC 2.7.8.-)
FAS, Lipids and polyketides metabolism	FAS/PKS precursorand regulation	4'-phosphopantetheinyl transferase (EC 2.7.8.-)
FAS, Lipids and polyketides metabolism	FAS/PKS precursorand regulation	Acetyl-coenzyme A carboxyl transferase alpha chain (EC 6.4.1.2) / Acetyl-coenzyme A carboxyl transferase beta chain (EC 6.4.1.2)
FAS, Lipids and polyketides metabolism	FAS/PKS precursorand regulation	Acetyl-coenzyme A synthetase (EC 6.2.1.1)
FAS, Lipids and polyketides metabolism	FAS/PKS precursorand regulation	Methylmalonyl-CoA mutase (EC 5.4.99.2)
FAS, Lipids and polyketides metabolism	lipid metabolism	Phosphoenolpyruvate-dihydroxyacetone phosphotransferase (EC 2.7.1.121), subunit DhaM;
FAS, Lipids and polyketides metabolism	Lipid metabolism FAS/PKS	Glycerophosphoryl diester phosphodiesterase (EC 3.1.4.46)
FAS, Lipids and polyketides metabolism	Lipid metabolism FAS/PKS	lipase/acylhydrolase, putative
Metal Related functions	Metals/metaloid scavenging and resistance	ABC-type Fe3+-siderophore transport system
Metal Related functions	Metals/metaloid scavenging and resistance	ABC-type Fe3+-siderophore transport system
Metal Related functions	Metals/metaloid scavenging and resistance	ABC-type Fe3+-siderophore transport system
Metal Related functions	Metals/metaloid scavenging and resistance	Copper metallochaperone, bacterial analog of Cox17 protein
Metal Related functions	Metals/metaloid scavenging and resistance	Copper resistance protein D
Metal Related functions	Metals/metaloid scavenging and resistance	Ferrous iron transport peroxidase EfeB
Metal Related functions	Metals/metaloid scavenging and resistance	Iron(III) dicitrate transport system, periplasmic iron-binding protein FecB (TC 3.A.1.14.1)
Other	Catabolism	3-hydroxybutyryl-CoA dehydrogenase (EC 1.1.1.157); 3-hydroxyacyl-CoA dehydrogenase (EC 1.1.1.35)
Other	Catabolism	4-carboxymuconolactone decarboxylase (EC 4.1.1.44)
Other	Catabolism	4-oxalocrotonate tautomerase (EC 5.3.2.-)
Other	Catabolism	Beta-ketoadipate enol-lactone hydrolase (EC 3.1.1.24)
Other	Catabolism	Butyryl-CoA dehydrogenase (EC 1.3.99.2)
Other	Catabolism	Butyryl-CoA dehydrogenase (EC 1.3.99.2)
Other	Chaperone	DnaJ-class molecular chaperone CbpA
Other	Horizontal gene transfer	Chain A, Structure Of Bal32a From A Soil-Derived Mobile Gene Cassette
Other	Horizontal gene transfer	Mobile element protein
Other	Porphyrin metabolism	L-threonine 3-O-phosphate decarboxylase (EC 4.1.1.81)
Other	Other	A-factor biosynthesis protein AfsA
Other	Enzyme	alcohol dehydrogenase, zinc-binding
Other	Enzyme	Aliphatic amidase AmiE (EC 3.5.1.4)
Other	Other	Alkaline phosphatase (EC 3.1.3.1)
Other	Resistance	antibiotic hydrolase
Other	Resistance	Beta-lactamase class A
Other	Other	Capsule biosynthesis protein capA
Other	Other	Carbon monoxide oxidation accessory protein CoxG
Other	Other	dehydrogenase
Other	Other	Dihydroxyacetone kinase, ATP-dependent (EC 2.7.1.29)
Other	Peptidase/protease	Dipeptidyl aminopeptidase/acylaminoacyl-peptidase-like protein
Other	Other	DSBA oxidoreductase
Other	Other	Exonuclease SbcC
Other	Other	Extensin-like protein
Other	Other	extracellular solute-binding protein, family 1
Other	Other	fibronectin type III domain protein
Other	Other	Flagellar hook-length control protein FliK
Other	Enzyme	Fumarylacetoacetase (EC 3.7.1.2)
Other	Other	FUPA24 P-type ATPase
Other	Enzyme	GCN5-related N-acetyltransferase
Other	Enzyme	GCN5-related N-acetyltransferase
Other	Other	glycine-rich protein
Other	Other	Heat shock protein GrpE
Other	Other	HigA protein (antitoxin to HigB)
Other	Other	HigA protein (antitoxin to HigB)
Other	Other	histidine-binding protein precursor
Other	Other	hydride transferase 1
Other	Other	hydrolase
Other	Enzyme	Hydroxypyruvate isomerase (EC 5.3.1.22)
Other	Other	integrin-like protein
Other	Other	iron sulphur protein
Other	Enzyme	Isopenicillin N-epimerase (EC 5.-.-.-)
Other	Enzyme	methyltransferase, FkbM family domain protein
Other	Other	Molybdate-binding domain of ModE
Other	Other	MoxR-like ATPases
Other	Other	NAD kinase (EC 2.7.1.23)
Other	Enzyme	Nudix hydrolase family protein
Other	Other	O-methyltransferase
Other	Enzyme	Oxidoreductase, short-chain dehydrogenase/reductase family (EC 1.1.1.-)
Other	Other	PE family protein
Other	Other	Periplasmic binding protein
Other	Other	possible gas vesicle synthesis protein
Other	Other	Predicted oxidoreductases (related to aryl-alcohol dehydrogenases)
Other	Other	Probable epoxide hydrolase ephC (EC 3.3.2.9)
Other	Other	PROBABLE O-METHYLTRANSFERASE OMT (EC 2.1.1.-)
Other	Other	probable solute-binding lipoprotein.
Other	Other	proline rich protein (putative membrane protein)
Other	Other	protein YceG like
Other	Other	proteinase inhibitor I4, serpin
Other	Other	putative ADP-ribosylglycohydrolase
Other	Other	Putative ATP/GTP-binding protein
Other	Other	putative cytochrome P450
Other	Other	putative cytochrome P450
Other	Other	putative cytochrome P450
Other	Other	putative cytochrome P450 hydroxylase
Other	Other	Putative dimeric protein
Other	Other	putative gas vesicle synthesis protein
Other	Other	putative hydrolase
Other	Other	putative monooxygenase
Other	Other	putative oxidoreductase
Other	Other	Putative phosphatase YfbT
Other	Vitamin B6 metabolism	putative racemase
Other	Other	putative secreted nucleosidase
Other	Other	putative secreted tripeptidylaminopeptidase
Other	Vitamin B6 metabolism	putative terpene cyclase
Other	Other	Putative threonine efflux protein
Other	Other	Rhs protein
Other	Salicylate metabolism	salicylate esterase
Other	Salicylate metabolism	Salicylate hydroxylase (EC 1.14.13.1)
Other	Salicylate metabolism	Salicylate hydroxylase (EC 1.14.13.1)
Other	Enzyme	Short-chain dehydrogenase/reductase SDR
Other	Other	Spore-associated protein A precursor
Other	Other	Tenebrin
Other	Other	Thioredoxin reductase (EC 1.8.1.9)
Other	Other	transferase
Other	Other	Universal stress protein family
Other	Other	Universal stress protein family
Other	Central carbon metabolism	NAD-dependent malic enzyme (EC 1.1.1.38)
Other	Central carbon metabolism	Ribose 5-phosphate isomerase B (EC 5.3.1.6)
Peptidase/protease	Peptidase/protease	serine protease precursor
Peptidase/protease	Peptidase/protease	peptidase M19, renal dipeptidase
Peptidase/protease	Peptidase/protease	peptidase M50
Peptidase/protease	Peptidase/protease	putative dipeptidase
Peptidase/protease	Peptidase/protease	secreted extracellular small neutral protease
Peptidase/protease	Peptidase/protease	Alpha-aspartyl dipeptidase Peptidase E (EC 3.4.13.21)
Regulator	Regulator	DNA-binding response regulator, LuxR family
Regulator	Regulator	Glycerol-3-phosphate regulon repressor, DeoR family
Regulator	Regulator	Aromatic hydrocarbon utilization transcriptional regulator CatR (LysR family)
Regulator	Regulator	Disease resistance domain-containing protein / Tetratricopeptide repeat-containing protein / Transcriptional regulator, LuxR family
Regulator	Regulator	DNA-binding response regulator
Regulator	Regulator	LuxR family transcriptional regulator
Regulator	Regulator	LysR family transcriptional regulator YbhD
Regulator	Regulator	Predicted transcriptional regulator of the myo-inositol catabolic operon
Regulator	Regulator	probable transcriptional regulator
Regulator	Regulator	Probable two-component system sensor kinase
Regulator	Regulator	putative DeoR-family transcriptional regulator
Regulator	Regulator	putative DNA binding protein
Regulator	Regulator	putative DNA-binding protein
Regulator	Regulator	putative DNA-binding protein
Regulator	Regulator	putative DNA-binding protein
Regulator	Regulator	Putative DNA-binding protein in cluster with Type I restriction-modification system
Regulator	Regulator	putative LysR-family transcriptional regulator.
Regulator	Regulator	putative regulatory protein
Regulator	Regulator	putative regulatory protein
Regulator	Regulator	putative response regulator
Regulator	Regulator	Putative two-component system response regulator
Regulator	Regulator	putative two-component system sensor kinase
Regulator	Regulator	Putative two-component system sensor kinase
Regulator	Regulator	Putative two-component system sensor kinase
Regulator	Regulator	regulatory protein
Regulator	Regulator	regulatory protein
Regulator	Regulator	regulatory protein
Regulator	Regulator	regulatory protein
Regulator	Regulator	regulatory protein
Regulator	Regulator	regulatory protein
Regulator	Regulator	regulatory protein
Regulator	Regulator	regulatory protein
Regulator	Regulator	two component transcriptional regulator, LuxR family
Regulator	Regulator	two component transcriptional regulator, LuxR family
Regulator	Regulator	Two-component hybrid sensor and regulator
Regulator	Regulator	TetR-family transcriptional regulator
Regulator	Regulator	Transcriptional regulator
Regulator	Regulator	Transcriptional regulator
Regulator	Regulator	Transcriptional regulator
Regulator	Regulator	Transcriptional regulator
Regulator	Regulator	Transcriptional regulator
Regulator	Regulator	Transcriptional regulator
Regulator	Regulator	Transcriptional regulator
Regulator	Regulator	transcriptional regulator
Regulator	Regulator	Transcriptional regulator
Regulator	Regulator	Transcriptional regulator
Regulator	Regulator	Transcriptional regulator
Regulator	Regulator	Transcriptional regulator
Regulator	Regulator	Transcriptional regulator
Regulator	Regulator	Transcriptional regulator
Regulator	Regulator	Transcriptional regulator
Regulator	Regulator	Transcriptional regulator
Regulator	Regulator	Transcriptional regulator
Regulator	Regulator	Transcriptional regulator
Regulator	Regulator	Transcriptional regulator
Regulator	Regulator	transcriptional regulator
Regulator	Regulator	transcriptional regulator
Regulator	Regulator	Transcriptional regulator
Regulator	Regulator	Transcriptional regulator
Regulator	Regulator	Transcriptional regulator
Regulator	Regulator	Transcriptional regulator
Regulator	Regulator	Transcriptional regulator
Regulator	Regulator	Transcriptional regulator
Regulator	Regulator	Transcriptional regulator
Regulator	Regulator	Transcriptional regulator
Regulator	Regulator	Transcriptional regulator
Regulator	Regulator	Transcriptional regulator
Regulator	Regulator	Transcriptional regulator
Regulator	Regulator	Transcriptional regulator
Regulator	Regulator	Transcriptional regulator
Regulator	Regulator	Transcriptional regulator
Regulator	Regulator	Transcriptional repressor
Regulator	Regulator	putative sensor-like histidine kinase
Regulator	Regulator	putative sensor-like histidine kinase
Regulator	Regulator	putative sensor-like histidine kinase
Regulator	Regulator	putative serine/threonine protein kinase
Regulator	Regulator	putative serine/threonine protein kinase
Regulator	Regulator	putative serine/threonine protein kinase
Regulator	Regulator	putative serine/threonine protein kinase
Regulator	Regulator	putative serine/threonine protein kinase
Regulator	Regulator	sensor histidine kinase
Regulator	Regulator	serine/threonine protein kinase
Regulator	Regulator	serine/threonine protein kinase
Regulator	Regulator	serine/threonine protein kinase
Regulator	Regulator	Adenylate cyclase (EC 4.6.1.1)
Regulator	Regulator	GntR-family transcriptional regulator
Regulator	Regulator	histidine kinase, dimerisation and phosphoacceptor region
Regulator	Regulator	multi-component regulatory system-10
Regulator	Regulator	Nitrate/nitrite response regulator protein
Regulator	Regulator	predicted biotin regulatory protein BioR (GntR family)
Regulator	Regulator	Signal transduction response regulator / Tetratricopeptide repeat-containing protein
Regulator	Regulator	YheO-like PAS domain
Sigma factors and related functions	Sigma factors and related functions	Serine phosphatase RsbU, regulator of sigma subunit
Sigma factors and related functions	Sigma factors and related functions	Serine phosphatase RsbU, regulator of sigma subunit
Sigma factors and related functions	Sigma factors and related functions	Serine phosphatase RsbU, regulator of sigma subunit
Sigma factors and related functions	Sigma factors and related functions	Serine phosphatase RsbU, regulator of sigma subunit
Sigma factors and related functions	Sigma factors and related functions	Serine phosphatase RsbU, regulator of sigma subunit
Sigma factors and related functions	Sigma factors and related functions	putative sigma factor
Sigma factors and related functions	Sigma factors and related functions	RNA polymerase sigma-70 factor, ECF subfamily
Sigma factors and related functions	Sigma factors and related functions	anti-sigma F factor antagonist (spoIIAA-2); anti sigma b factor antagonist RsbV
Sigma factors and related functions	Sigma factors and related functions	Anti-sigma F factor antagonist (spoIIAA-2); Anti-sigma B factor antagonist RsbV
Sigma factors and related functions	Sigma factors and related functions	regulator of sigma factor
Sigma factors and related functions	Sigma factors and related functions	RNA polymerase sigma factor
Sigma factors and related functions	Sigma factors and related functions	RNA polymerase sigma factor (ECF subfamily)
Transporter	Transporter	probable sugar ABC transporter, substrate-binding protein, putative
Transporter	Transporter	ABC transporter ATP-binding protein
Transporter	Transporter	ABC transporter permease
Transporter	Transporter	ABC transporter, permease protein
Transporter	Transporter	ABC-type polar amino acid transport system, ATPase component
Transporter	Transporter	ABC-type sugar transport systems, permease components
Transporter	Transporter	Arginine/ornithine antiporter ArcD
Transporter	Transporter	dicarboxylic acid transporter PcaT
Transporter	Transporter	Dipeptide transport ATP-binding protein DppD (TC 3.A.1.5.2)
Transporter	Transporter	Gluconate permease, Bsu4004 homolog
Transporter	Transporter	Glycerol-3-phosphate ABC transporter, periplasmic glycerol-3-phosphate-binding protein (TC 3.A.1.1.3)
Transporter	Transporter	Hydroxymethylpyrimidine ABC transporter, substrate-binding component
Transporter	Transporter	Hydroxymethylpyrimidine ABC transporter, transmembrane component
Transporter	Transporter	L-proline glycine betaine binding ABC transporter protein ProX (TC 3.A.1.12.1)
Transporter	Transporter	L-Proline/Glycine betaine transporter ProP
Transporter	Transporter	Multiple sugar ABC transporter, membrane-spanning permease protein MsmG
Transporter	Transporter	N-Acetyl-D-glucosamine ABC transport system, permease protein 1
Transporter	Transporter	N-Acetyl-D-glucosamine ABC transport system, sugar-binding protein
Transporter	Transporter	Oligopeptide ABC transporter, periplasmic oligopeptide-binding protein OppA (TC 3.A.1.5.1)
Transporter	Transporter	Oligopeptide ABC transporter, periplasmic oligopeptide-binding protein OppA (TC 3.A.1.5.1)
Transporter	Transporter	Oligopeptide ABC transporter, periplasmic oligopeptide-binding protein OppA (TC 3.A.1.5.1)
Transporter	Transporter	Oligopeptide transport system permease protein OppB (TC 3.A.1.5.1)
Transporter	Transporter	Oligopeptide transport system permease protein OppC (TC 3.A.1.5.1)
Transporter	Transporter	PTS system, mannose-specific IIB component (EC 2.7.1.69)
Transporter	Transporter	Gluconate transporter family protein
Transporter	Transporter	Phosphate ABC transporter, periplasmic phosphate-binding protein PstS (TC 3.A.1.7.1)
Transporter	Transporter	putative sugar ABC transporter, permease component
Transporter	Transporter	sugar ABC transporter, permease protein
Transporter	Transporter	Uncharacterized transporter, similarity to citrate transporter
Transporter	Transporter	polar amino acid ABC transporter, inner membrane subunit
Transporter	Transporter	putative integral membrane transport protein
Transporter	Transporter	Methionine ABC transporter ATP-binding protein
Transporter	Transporter	Sialic acid transporter (permease) NanT
Unknown function	Unknown function	hypothetical protein
Unknown function	Unknown function	hypothetical protein
Unknown function	Unknown function	hypothetical protein
Unknown function	Unknown function	hypothetical protein
Unknown function	Unknown function	hypothetical protein
Unknown function	Unknown function	hypothetical protein
Unknown function	Unknown function	hypothetical protein
Unknown function	Unknown function	hypothetical protein
Unknown function	Unknown function	hypothetical protein
Unknown function	Unknown function	hypothetical protein
Unknown function	Unknown function	hypothetical protein
Unknown function	Unknown function	hypothetical protein
Unknown function	Unknown function	hypothetical protein
Unknown function	Unknown function	hypothetical protein
Unknown function	Unknown function	hypothetical protein
Unknown function	Unknown function	hypothetical protein
Unknown function	Unknown function	hypothetical protein
Unknown function	Unknown function	hypothetical protein
Unknown function	Unknown function	hypothetical protein
Unknown function	Unknown function	hypothetical protein
Unknown function	Unknown function	hypothetical protein
Unknown function	Unknown function	hypothetical protein
Unknown function	Unknown function	hypothetical protein
Unknown function	Unknown function	hypothetical protein
Unknown function	Unknown function	hypothetical protein
Unknown function	Unknown function	hypothetical protein
Unknown function	Unknown function	hypothetical protein
Unknown function	Unknown function	hypothetical protein
Unknown function	Unknown function	hypothetical protein
Unknown function	Unknown function	hypothetical protein
Unknown function	Unknown function	hypothetical protein
Unknown function	Unknown function	hypothetical protein
Unknown function	Unknown function	hypothetical protein
Unknown function	Unknown function	hypothetical protein
Unknown function	Unknown function	hypothetical protein
Unknown function	Unknown function	hypothetical protein
Unknown function	Unknown function	hypothetical protein
Unknown function	Unknown function	hypothetical protein
Unknown function	Unknown function	hypothetical protein
Unknown function	Unknown function	hypothetical protein
Unknown function	Unknown function	hypothetical protein
Unknown function	Unknown function	hypothetical protein
Unknown function	Unknown function	hypothetical protein
Unknown function	Unknown function	hypothetical protein
Unknown function	Unknown function	hypothetical protein
Unknown function	Unknown function	hypothetical protein
Unknown function	Unknown function	hypothetical protein
Unknown function	Unknown function	hypothetical protein
Unknown function	Unknown function	hypothetical protein
Unknown function	Unknown function	hypothetical protein
Unknown function	Unknown function	hypothetical protein
Unknown function	Unknown function	hypothetical protein
Unknown function	Unknown function	hypothetical protein
Unknown function	Unknown function	hypothetical protein
Unknown function	Unknown function	hypothetical protein
Unknown function	Unknown function	hypothetical protein
Unknown function	Unknown function	hypothetical protein
Unknown function	Unknown function	hypothetical protein
Unknown function	Unknown function	hypothetical protein
Unknown function	Unknown function	hypothetical protein
Unknown function	Unknown function	hypothetical protein
Unknown function	Unknown function	hypothetical protein
Unknown function	Unknown function	hypothetical protein
Unknown function	Unknown function	hypothetical protein
Unknown function	Unknown function	hypothetical protein
Unknown function	Unknown function	hypothetical protein
Unknown function	Unknown function	hypothetical protein
Unknown function	Unknown function	hypothetical protein
Unknown function	Unknown function	hypothetical protein
Unknown function	Unknown function	hypothetical protein
Unknown function	Unknown function	hypothetical protein
Unknown function	Unknown function	hypothetical protein
Unknown function	Unknown function	hypothetical protein
Unknown function	Unknown function	hypothetical protein
Unknown function	Unknown function	hypothetical protein
Unknown function	Unknown function	hypothetical protein
Unknown function	Unknown function	hypothetical protein
Unknown function	Unknown function	hypothetical protein
Unknown function	Unknown function	hypothetical protein
Unknown function	Unknown function	hypothetical protein
Unknown function	Unknown function	hypothetical protein
Unknown function	Unknown function	hypothetical protein
Unknown function	Unknown function	hypothetical protein
Unknown function	Unknown function	hypothetical protein
Unknown function	Unknown function	hypothetical protein
Unknown function	Unknown function	hypothetical protein
Unknown function	Unknown function	hypothetical protein
Unknown function	Unknown function	hypothetical protein
Unknown function	Unknown function	hypothetical protein
Unknown function	Unknown function	hypothetical protein
Unknown function	Unknown function	hypothetical protein
Unknown function	Unknown function	hypothetical protein
Unknown function	Unknown function	hypothetical protein
Unknown function	Unknown function	hypothetical protein
Unknown function	Unknown function	hypothetical protein
Unknown function	Unknown function	hypothetical protein
Unknown function	Unknown function	hypothetical protein
Unknown function	Unknown function	hypothetical protein
Unknown function	Unknown function	hypothetical protein
Unknown function	Unknown function	hypothetical protein
Unknown function	Unknown function	hypothetical protein
Unknown function	Unknown function	hypothetical protein
Unknown function	Unknown function	hypothetical protein
Unknown function	Unknown function	hypothetical protein
Unknown function	Unknown function	hypothetical protein
Unknown function	Unknown function	hypothetical protein
Unknown function	Unknown function	hypothetical protein
Unknown function	Unknown function	hypothetical protein
Unknown function	Unknown function	hypothetical protein
Unknown function	Unknown function	hypothetical protein
Unknown function	Unknown function	hypothetical protein
Unknown function	Unknown function	hypothetical protein
Unknown function	Unknown function	hypothetical protein
Unknown function	Unknown function	hypothetical protein
Unknown function	Unknown function	hypothetical protein
Unknown function	Unknown function	hypothetical protein
Unknown function	Unknown function	hypothetical protein
Unknown function	Unknown function	hypothetical protein
Unknown function	Unknown function	hypothetical protein
Unknown function	Unknown function	hypothetical protein
Unknown function	Unknown function	hypothetical protein
Unknown function	Unknown function	hypothetical protein
Unknown function	Unknown function	hypothetical protein
Unknown function	Unknown function	hypothetical protein
Unknown function	Unknown function	hypothetical protein
Unknown function	Unknown function	hypothetical protein
Unknown function	Unknown function	hypothetical protein
Unknown function	Unknown function	hypothetical protein
Unknown function	Unknown function	hypothetical protein
Unknown function	Unknown function	hypothetical protein
Unknown function	Unknown function	hypothetical protein
Unknown function	Unknown function	hypothetical protein
Unknown function	Unknown function	hypothetical protein
Unknown function	Unknown function	hypothetical protein
Unknown function	Unknown function	hypothetical protein
Unknown function	Unknown function	hypothetical protein
Unknown function	Unknown function	hypothetical protein
Unknown function	Unknown function	hypothetical protein
Unknown function	Unknown function	hypothetical protein
Unknown function	Unknown function	hypothetical protein
Unknown function	Unknown function	hypothetical protein
Unknown function	Unknown function	hypothetical protein
Unknown function	Unknown function	hypothetical protein
Unknown function	Unknown function	hypothetical protein
Unknown function	Unknown function	hypothetical protein
Unknown function	Unknown function	hypothetical protein
Unknown function	Unknown function	hypothetical protein
Unknown function	Unknown function	hypothetical protein
Unknown function	Unknown function	hypothetical protein
Unknown function	Unknown function	hypothetical protein
Unknown function	Unknown function	hypothetical protein
Unknown function	Unknown function	hypothetical protein
Unknown function	Unknown function	hypothetical protein
Unknown function	Unknown function	hypothetical protein
Unknown function	Unknown function	hypothetical protein
Unknown function	Unknown function	hypothetical protein
Unknown function	Unknown function	hypothetical protein
Unknown function	Unknown function	hypothetical protein
Unknown function	Unknown function	hypothetical protein
Unknown function	Unknown function	hypothetical protein
Unknown function	Unknown function	hypothetical protein
Unknown function	Unknown function	hypothetical protein
Unknown function	Unknown function	hypothetical protein
Unknown function	Unknown function	hypothetical protein
Unknown function	Unknown function	hypothetical protein
Unknown function	Unknown function	hypothetical protein
Unknown function	Unknown function	hypothetical protein
Unknown function	Unknown function	hypothetical protein
Unknown function	Unknown function	hypothetical protein
Unknown function	Unknown function	hypothetical protein
Unknown function	Unknown function	hypothetical protein
Unknown function	Unknown function	hypothetical protein
Unknown function	Unknown function	hypothetical protein
Unknown function	Unknown function	hypothetical protein
Unknown function	Unknown function	hypothetical protein
Unknown function	Unknown function	hypothetical protein
Unknown function	Unknown function	hypothetical protein
Unknown function	Unknown function	hypothetical protein
Unknown function	Unknown function	hypothetical protein
Unknown function	Unknown function	hypothetical protein
Unknown function	Unknown function	hypothetical protein
Unknown function	Unknown function	hypothetical protein
Unknown function	Unknown function	hypothetical protein
Unknown function	Unknown function	hypothetical protein
Unknown function	Unknown function	hypothetical protein
Unknown function	Unknown function	hypothetical protein
Unknown function	Unknown function	hypothetical protein
Unknown function	Unknown function	hypothetical protein
Unknown function	Unknown function	hypothetical protein
Unknown function	Unknown function	hypothetical protein
Unknown function	Unknown function	hypothetical protein
Unknown function	Unknown function	hypthetical protein SCD63.18c
Unknown function	Unknown function	COG1720: Uncharacterized conserved protein
Unknown function	Unknown function	Conserved domain protein
Unknown function	Unknown function	Cupin 2 barrel domain protein
Unknown function	Unknown function	cupin domain protein
Unknown function	Unknown function	expressed protein
Unknown function	Unknown function	Protein of unknown function
Unknown function	Unknown function	Mll7342 protein
Unknown function	Unknown function	Mlr0593 protein
Unknown function	Unknown function	Mlr6568 protein
Unknown function	Unknown function	protein of unknown function DUF1275
Unknown function	Unknown function	Protein of unknown function DUF1555
Unknown function	Unknown function	integral membrane protein
Unknown function	Unknown function	integral membrane protein
Unknown function	Unknown function	lipoprotein
Unknown function	Unknown function	lipoprotein
Unknown function	Unknown function	membrane protein
Unknown function	Unknown function	membrane protein
Unknown function	Unknown function	membrane protein
Unknown function	Unknown function	membrane protein, putative
Unknown function	Unknown function	Orf21; putative lipoprotein
Unknown function	Unknown function	putative integral membrane protein
Unknown function	Unknown function	putative integral membrane protein
Unknown function	Unknown function	putative integral membrane protein
Unknown function	Unknown function	putative integral membrane protein
Unknown function	Unknown function	putative integral membrane protein
Unknown function	Unknown function	putative integral membrane protein
Unknown function	Unknown function	putative integral membrane protein
Unknown function	Unknown function	putative integral membrane protein
Unknown function	Unknown function	putative integral membrane protein
Unknown function	Unknown function	putative lipoprotein
Unknown function	Unknown function	putative lipoprotein
Unknown function	Unknown function	putative lipoprotein
Unknown function	Unknown function	putative membrane protein
Unknown function	Unknown function	putative membrane protein
Unknown function	Unknown function	putative membrane protein
Unknown function	Unknown function	putative membrane protein
Unknown function	Unknown function	putative membrane protein
Unknown function	Unknown function	putative membrane protein
Unknown function	Unknown function	putative membrane protein
Unknown function	Unknown function	putative membrane protein
Unknown function	Unknown function	putative membrane protein
Unknown function	Unknown function	putative membrane protein
Unknown function	Unknown function	putative membrane protein
Unknown function	Unknown function	putative membrane protein.
Unknown function	Unknown function	putative protein of unknown function (DUF718)
Unknown function	Unknown function	putative secreted protein
Unknown function	Unknown function	putative secreted protein
Unknown function	Unknown function	putative secreted protein
Unknown function	Unknown function	putative secreted protein
Unknown function	Unknown function	putative secreted protein
Unknown function	Unknown function	putative secreted protein
Unknown function	Unknown function	Putative secreted protein
Unknown function	Unknown function	secreted protein
Unknown function	Unknown function	secreted protein
Unknown function	Unknown function	secreted protein
Unknown function	Unknown function	secreted protein
Unknown function	Unknown function	secreted protein
Unknown function	Unknown function	secreted protein
Unknown function	Unknown function	probable secreted protein
Unknown function	Unknown function	Putative secreted protein
Unknown function	Unknown function	Unknown funtion
Unknown function	Unknown function	Unknown protein
Unknown function	Unknown function	transmembrane protein, distant homology with ydbS
