# Supplementary material for: The natural product co-evolved pyrroloquinoline quinone gene enhances their production when heterologously expressed in a variety of Streptomycetes
Source: Research Square preprint supplement (doi:10.21203/rs.3.rs-2734079/v1), 2023-04-04
Supplement: Supplementary file 4 [file fe8e549ee5c7145943b4c1c8.xlsx]

## Sheet: Streptomyces coelicolor
Compound Mass@Retention Time	[152](3)	[PQQ](3)	[152] (RSD)	[PQQ] (RSD)	[PQQ] avg : Normalized	[152] avg : Normalized	Signed FC (abs) ([PQQ] vs [152]) : Normalized	FC (abs) ([PQQ] vs [152]) : Normalized	[PQQ] avg : Raw	[152] avg : Raw	Signed FC (abs) ([PQQ] vs [152]) : Raw	[PQQ] avg : Raw Scaled	[152] avg : Raw Scaled	Signed FC (abs) ([PQQ] vs [152]) : Raw Scaled	Abund Diff (Raw) ([PQQ] - [152])	Abund Diff (Log2) ([PQQ] - [152])
378.094@1.2959999	3	3	0.318834	1.93457	26.9181	26.2556	1.58285	1.58285	126814648	80117672	1.58285	126814648	80117672	1.58285	46696976	25.4768
196.1101@6.2990003:1	3	3	0.210123	0.266016	25.3719	25.58	-1.15513	1.15513	43421388	50157288	-1.15513	43421388	50157288	-1.15513	-6735900	-22.6834
379.0967@1.1610001	3	3	0.120102	0.459055	24.1517	23.9742	1.13092	1.13092	18637472	16479932	1.13092	18637472	16479932	1.13092	2157540	21.041
602.1693@3.1690001	3	3	0.0812295	0.748428	24.5977	24.9963	-1.31827	1.31827	25388898	33469366	-1.31827	25388898	33469366	-1.31827	-8080468	-22.946
165.0784@3.3940008	3	3	0.732922	1.13572	18.1227	18.6117	-1.40348	1.40348	285407	400564	-1.40348	285407	400564	-1.40348	-115157	-16.8132
312.1762@9.602999	3	3	1.14932	0.418311	24.6705	24.2414	1.34632	1.34632	26702176	19833422	1.34632	26702176	19833422	1.34632	6868754	22.7116
182.0943@5.813	3	3	0.122377	0.215045	23.9884	24.1381	-1.10935	1.10935	16642700	18462590	-1.10935	16642700	18462590	-1.10935	-1819890	-20.7954
219.1106@3.5239997	3	3	0.19845	0.572899	23.757	23.5174	1.18068	1.18068	14176200	12006855	1.18068	14176200	12006855	1.18068	2169345	21.0488
196.1101@6.2990003:2	3	3	0.210429	0.264768	25.3717	25.5799	-1.1552	1.1552	43416048	50154372	-1.1552	43416048	50154372	-1.1552	-6738324	-22.684
302.0785@5.451	3	3	1.06006	0.0939445	23.0181	22.6386	1.30092	1.30092	8494709	6.52977e+06	1.30092	8494709	6.52977e+06	1.30092	1.96494e+06	20.9061
152.1201@6.2990003	3	3	0.307843	0.3203	23.1939	23.4728	-1.21326	1.21326	9595216	11641538	-1.21326	9595216	11641538	-1.21326	-2046322	-20.9646
146.0215@1.6159999	3	3	0.583778	0.896265	23.5771	23.2583	1.24726	1.24726	12514133	10033289	1.24726	12514133	10033289	1.24726	2480844	21.2424
102.0315@1.6130002	3	3	0.907277	0.739626	23.3269	22.8954	1.34862	1.34862	10521823	7.80191e+06	1.34862	10521823	7.80191e+06	1.34862	2.71992e+06	21.3751
602.1686@1.2229999	3	3	0.324122	1.06357	22.53	22.8902	-1.28364	1.28364	6.05608e+06	7.77381e+06	-1.28364	6.05608e+06	7.77381e+06	-1.28364	-1717728	-20.7121
318.0732@4.9910007	3	3	1.56061	1.51453	21.2339	20.586	1.56695	1.56695	2.46632e+06	1.57396e+06	1.56695	2.46632e+06	1.57396e+06	1.56695	892361	19.7673
1576.5005@5.7200007	3	3	1.31014	1.07001	22.0919	21.4906	1.517	1.517	4470039	2946627	1.517	4470039	2946627	1.517	1523412	20.5389
1109.6597@4.874	3	3	1.2163	2.03544	22.1049	21.2544	1.8031	1.8031	4510633	2501596	1.8031	4510633	2501596	1.8031	2009037	20.9381
342.1158@1.6669999	3	3	3.55208	3.03852	20.0064	21.2644	-2.39171	2.39171	1.0532e+06	2.51895e+06	-2.39171	1.0532e+06	2.51895e+06	-2.39171	-1.46575e+06	-20.4832
828.273@1.6070002	3	3	0.352197	0.622574	19.1686	19.3705	-1.15019	1.15019	589289	677796	-1.15019	589289	677796	-1.15019	-88506.9	-16.4335
510.1198@1.259	3	3	0.793335	0.819815	21.9919	21.648	1.26915	1.26915	4.17083e+06	3286314	1.26915	4.17083e+06	3286314	1.26915	884517	19.7545
138.1044@5.813	3	3	0.063158	0.208161	22.0371	22.21	-1.12735	1.12735	4.30355e+06	4851608	-1.12735	4.30355e+06	4851608	-1.12735	-548058	-19.064
414.1166@4.4000006	3	3	1.02586	1.32989	20.6972	21.1665	-1.38438	1.38438	1.70013e+06	2.35362e+06	-1.38438	1.70013e+06	2.35362e+06	-1.38438	-653492	-19.3178
232.0366@5.2330003	3	3	0.529956	0.760482	21.6865	21.2646	1.33967	1.33967	3.37518e+06	2.5194e+06	1.33967	3.37518e+06	2.5194e+06	1.33967	855776	19.7069
252.0934@1.179	3	3	0.405671	4.91687	19.7911	21.2471	-2.74343	2.74343	907207	2.48886e+06	-2.74343	907207	2.48886e+06	-2.74343	-1.58166e+06	-20.593
814.3142@8.171999	3	3	0.747041	5.71232	19.6952	21.0053	-2.47954	2.47954	848878	2104824	-2.47954	848878	2104824	-2.47954	-1.25595e+06	-20.2603
230.1262@4.2760005	3	3	0.649073	0.847754	20.0405	20.7283	-1.61088	1.61088	1.07842e+06	1.73719e+06	-1.61088	1.07842e+06	1.73719e+06	-1.61088	-658778	-19.3294
365.0741@5.4550004	3	3	0.695024	0.195538	21.4224	21.1949	1.17081	1.17081	2.81045e+06	2400441	1.17081	2.81045e+06	2400441	1.17081	410008	18.6453
175.0479@1.705	3	3	0.286437	0.402763	21.3789	21.6656	-1.21989	1.21989	2.72699e+06	3326622	-1.21989	2.72699e+06	3326622	-1.21989	-599636	-19.1937
334.0682@5.9739995	3	3	1.5806	2.2884	21.1262	20.1363	1.98603	1.98603	2288866	1.15248e+06	1.98603	2288866	1.15248e+06	1.98603	1.13638e+06	20.116
302.0783@5.0849996:1	3	3	1.51041	0.633298	21.2462	20.8246	1.33941	1.33941	2487438	1.85712e+06	1.33941	2487438	1.85712e+06	1.33941	630317	19.2657
318.0734@4.8629994	3	3	1.7762	2.02191	20.0479	19.157	1.85439	1.85439	1.08401e+06	584562	1.85439	1.08401e+06	584562	1.85439	499443	18.93
976.3668@7.747001	3	3	0.815079	1.56411	20.4485	21.0906	-1.56064	1.56064	1.4309e+06	2.23311e+06	-1.56064	1.4309e+06	2.23311e+06	-1.56064	-802215	-19.6136
158.0692@1.106	3	3	0.24065	0.809739	21.3493	20.7475	1.51764	1.51764	2671655	1.7604e+06	1.51764	2671655	1.7604e+06	1.51764	911258	19.7975
402.2465@4.2620006	3	3	0.871684	0.708846	20.4849	20.1935	1.22382	1.22382	1.46748e+06	1.19909e+06	1.22382	1.46748e+06	1.19909e+06	1.22382	268387	18.034
212.1045@4.86	3	3	1.28213	0.983804	21.1057	20.5897	1.42996	1.42996	2256593	1.57808e+06	1.42996	2256593	1.57808e+06	1.42996	678509	19.372
330.037@5.6440005	3	3	1.77887	1.67534	20.6582	18.8272	3.55776	3.55776	1.65478e+06	465120	3.55776	1.65478e+06	465120	3.55776	1.18966e+06	20.1821
324.0444@3.5680006	3	3	0.288817	1.43019	20.7939	20.1984	1.51101	1.51101	1.81794e+06	1203131	1.51101	1.81794e+06	1203131	1.51101	614809	19.2298
146.1056@1.0930002	3	3	0.441388	0.362455	15.4056	15.9019	-1.41064	1.41064	43404.5	61227.9	-1.41064	43404.5	61227.9	-1.41064	-17823.4	-14.1215
301.1121@3.1590002	3	3	0.613165	1.01856	20.4586	20.7722	-1.24287	1.24287	1.44092e+06	1.79088e+06	-1.24287	1.44092e+06	1.79088e+06	-1.24287	-349960	-18.4168
480.1221@3.0849998	3	3	0.946103	0.339456	20.1591	20.7981	-1.55728	1.55728	1.17085e+06	1.82333e+06	-1.55728	1.17085e+06	1.82333e+06	-1.55728	-652487	-19.3156
455.199@3.0300002	3	3	0.409167	0.584413	20.7985	21.0173	-1.16376	1.16376	1.82373e+06	2.12238e+06	-1.16376	1.82373e+06	2.12238e+06	-1.16376	-298647	-18.1881
1423.4803@7.1069994	3	3	0.161512	1.09259	20.659	21.2266	-1.48207	1.48207	1.65568e+06	2.45384e+06	-1.48207	1.65568e+06	2.45384e+06	-1.48207	-798157	-19.6063
117.9357@16.474	3	3	1.75093	0.514069	20.4255	19.0712	2.55676	2.55676	1.40831e+06	550819	2.55676	1.40831e+06	550819	2.55676	857493	19.7098
1222.7423@4.98	3	3	1.42811	2.07936	20.5568	19.8551	1.62651	1.62651	1542502	948348	1.62651	1542502	948348	1.62651	594154	19.1805
274.0834@4.8629994	3	3	1.47742	1.79319	20.0165	19.2801	1.66602	1.66602	1.06066e+06	636645	1.66602	1.06066e+06	636645	1.66602	424016	18.6938
119.0579@1.1079999	3	3	0.4262	0.838008	16.3609	16.899	-1.452	1.452	84165.2	122208	-1.452	84165.2	122208	-1.452	-38042.6	-15.2153
1480.5024@5.8250003	3	3	1.06174	1.42078	21.5722	21.0262	1.46005	1.46005	3.11805e+06	2.13558e+06	1.46005	3.11805e+06	2.13558e+06	1.46005	982472	19.9061
214.0927@1.0459999	3	3	1.54118	1.46816	14.623	15.0908	-1.38294	1.38294	25233.1	34895.9	-1.38294	25233.1	34895.9	-1.38294	-9662.76	-13.2382
482.264@8.849	3	3	0.596027	5.86793	16.1541	17.3219	-2.24662	2.24662	72924.1	163832	-2.24662	72924.1	163832	-2.24662	-90908.3	-16.4721
327.1313@3.3840003	3	3	0.399203	0.311104	19.6224	19.8361	-1.15965	1.15965	807123	935983	-1.15965	807123	935983	-1.15965	-128860	-16.9754
354.0553@3.6399996	3	3	0.104213	0.894963	20.4468	20.0123	1.35152	1.35152	1429269	1.05753e+06	1.35152	1429269	1.05753e+06	1.35152	371738	18.5039
1003.6913@4.8779993	3	3	1.55582	0.297508	20.0574	19.4289	1.54587	1.54587	1.0911e+06	705817	1.54587	1.0911e+06	705817	1.54587	385283	18.5556
602.3627@4.4690003	3	3	0.807681	1.3112	20.296	20.7813	-1.39982	1.39982	1.28741e+06	1.80214e+06	-1.39982	1.28741e+06	1.80214e+06	-1.39982	-514732	-18.9735
1380.4384@7.335999	3	3	0.458807	0.31785	20.9849	21.3806	-1.31558	1.31558	2.07526e+06	2.73019e+06	-1.31558	2.07526e+06	2.73019e+06	-1.31558	-654922	-19.321
1096.4648@4.0579996	3	3	0.474057	0.74409	20.1424	20.4983	-1.2798	1.2798	1157377	1.48121e+06	-1.2798	1157377	1.48121e+06	-1.2798	-323833	-18.3049
532.1388@3.4699998	3	3	0.304985	0.11637	20.2959	20.4494	-1.11231	1.11231	1.28725e+06	1.43182e+06	-1.11231	1.28725e+06	1.43182e+06	-1.11231	-144567	-17.1414
192.0419@4.9910007	3	3	1.72136	1.50927	19.9813	19.4399	1.45538	1.45538	1.03505e+06	711187	1.45538	1.03505e+06	711187	1.45538	323858	18.305
462.1577@1.6429998	3	3	1.15787	1.50287	19.4836	19.9363	-1.36867	1.36867	733050	1.0033e+06	-1.36867	733050	1.0033e+06	-1.36867	-270253	-18.044
828.2718@1.1879998	3	3	0.935202	0.52193	18.8292	19.0859	-1.19473	1.19473	465757	556455	-1.19473	465757	556455	-1.19473	-90697.8	-16.4688
206.0425@1.2919999	3	3	0.238078	0.554784	20.4503	20.2627	1.13894	1.13894	1.43274e+06	1.25796e+06	1.13894	1.43274e+06	1.25796e+06	1.13894	174776	17.4152
1138.4194@7.418999	3	3	1.13794	3.35966	19.4178	20.7549	-2.52656	2.52656	700373	1.76954e+06	-2.52656	700373	1.76954e+06	-2.52656	-1069163	-20.0281
136.0521@3.947	3	3	0.248412	1.04634	18.7498	19.2071	-1.37301	1.37301	440810	605235	-1.37301	440810	605235	-1.37301	-164426	-17.3271
200.1151@1.727	3	3	0.37643	3.71156	16.2558	18.6092	-5.11042	5.11042	78249.9	399890	-5.11042	78249.9	399890	-5.11042	-321640	-18.2951
596.1515@3.1159997	3	3	0.383299	4.49492	19.7318	20.7204	-1.98419	1.98419	870712	1.72766e+06	-1.98419	870712	1.72766e+06	-1.98419	-856948	-19.7088
602.222@3.1639998	3	3	0.228061	0.912905	20.4028	20.7129	-1.2398	1.2398	1.38634e+06	1.71878e+06	-1.2398	1.38634e+06	1.71878e+06	-1.2398	-332440	-18.3427
596.3287@4.0159993	3	3	3.47454	5.75782	17.97	19.562	-3.01477	3.01477	256741	774015	-3.01477	256741	774015	-3.01477	-517274	-18.9806
896.4009@7.9940004	3	3	0.983712	1.46694	19.3504	19.8905	-1.45413	1.45413	668406	971952	-1.45413	668406	971952	-1.45413	-303546	-18.2116
120.0418@1.2869998	3	3	0.0740162	1.19275	19.984	20.5261	-1.45609	1.45609	1.03698e+06	1.50994e+06	-1.45609	1.03698e+06	1.50994e+06	-1.45609	-472959	-18.8514
314.042@5.548	3	3	1.07506	1.08875	20.1037	19.4701	1.55135	1.55135	1.12669e+06	726265	1.55135	1.12669e+06	726265	1.55135	400426	18.6112
1224.2844@3.1700003	3	3	0.456373	2.04516	16.5734	17.1043	-1.44479	1.44479	97520.4	140896	-1.44479	97520.4	140896	-1.44479	-43375.6	-15.4046
292.1081@3.9150007	3	3	0.169826	0.444087	17.9425	18.0993	-1.11487	1.11487	251894	280828	-1.11487	251894	280828	-1.11487	-28934	-14.8205
381.0689@4.9910007	3	3	1.50859	1.38243	19.9329	19.4271	1.41987	1.41987	1000919	704934	1.41988	1000919	704934	1.41988	295984	18.1752
1193.3402@1.2130002	3	3	0.500403	3.34479	19.5704	20.4507	-1.84071	1.84071	778534	1.43305e+06	-1.84071	778534	1.43305e+06	-1.84071	-654517	-19.3201
375.2276@4.2620006	3	3	1.25156	0.467214	19.9209	19.5671	1.27788	1.27788	992609	776763	1.27788	992609	776763	1.27788	215846	17.7196
650.1259@7.056	3	3	0.335574	5.48111	18.727	17.5459	2.26759	2.26759	433911	191354	2.26759	433911	191354	2.26759	242558	17.888
339.2252@4.2610006	3	3	1.24387	0.43698	19.8838	19.4591	1.34234	1.34234	967460	720727	1.34234	967460	720727	1.34234	246733	17.9126
500.1852@1.127	3	3	1.05606	1.24616	20.1142	19.5761	1.452	1.452	1.13495e+06	781643	1.452	1.13495e+06	781643	1.452	353306	18.4306
400.2078@3.7599998	3	3	4.1216	0.873337	16.7212	17.5614	-1.7903	1.7903	108042	193428	-1.7903	108042	193428	-1.7903	-85385.6	-16.3817
204.0999@3.9949992	3	3	5.38302	7.0762	15.8416	17.8874	-4.12892	4.12892	58722.8	242462	-4.12892	58722.8	242462	-4.12892	-183739	-17.4873
1286.4086@4.251	3	3	1.36958	0.77876	18.5413	19.0337	-1.40685	1.40685	381484	536691	-1.40685	381484	536691	-1.40685	-155208	-17.2438
198.0889@4.4220004	3	3	1.42379	1.39576	19.8036	18.839	1.95154	1.95154	915145	468935	1.95154	915145	468935	1.95154	446210	18.7674
996.5762@4.861	3	3	0.744399	2.04449	19.7697	19.018	1.68373	1.68373	893841	530871	1.68373	893841	530871	1.68373	362970	18.4695
3034.674@0.9169999	3	3	0.64838	2.14865	19.0482	20.0436	-1.99365	1.99365	542105	1.08077e+06	-1.99365	542105	1.08077e+06	-1.99365	-538661	-19.039
260.1368@3.8870008	3	3	0.846438	2.04183	19.5007	20.0709	-1.48468	1.48468	741823	1.10137e+06	-1.48468	741823	1.10137e+06	-1.48468	-359544	-18.4558
324.1598@6.9479985	3	3	173.205	6.48888	17.0761	5.72347	2615.1	2615.1	138173	52.8366	2615.1	138173	52.8366	2615.1	138120	17.0756
445.0984@0.915	3	3	0.860441	3.38144	17.4806	19.1133	-3.10097	3.10097	182886	567124	-3.10097	182886	567124	-3.10097	-384238	-18.5516
178.0472@1.7770003	3	3	0.302726	1.00184	19.3661	19.6203	-1.19267	1.19267	675746	805940	-1.19267	675746	805940	-1.19267	-130195	-16.9903
535.2994@5.326	3	3	0.0849217	0.37789	19.7456	20.123	-1.29902	1.29902	879031	1.14187e+06	-1.29902	879031	1.14187e+06	-1.29902	-262844	-18.0038
513.2787@4.4210005	3	3	0.378479	0.497612	19.535	19.8012	-1.20265	1.20265	759657	913600	-1.20265	759657	913600	-1.20265	-153943	-17.232
648.1409@1.2320001	3	3	1.99192	7.74657	14.8758	16.6964	-3.53247	3.53247	30064.1	106200	-3.53247	30064.1	106200	-3.53247	-76136.4	-16.2163
1594.5096@5.4599996	3	3	1.83108	1.40973	19.6976	19.1769	1.4346	1.4346	850270	592689	1.4346	850270	592689	1.4346	257581	17.9747
1136.3464@1.6169999	3	3	0.506051	1.61195	18.3665	17.9962	1.29261	1.29261	337957	261453	1.29261	337957	261453	1.29261	76504.1	16.2233
218.0576@5.1899996	3	3	0.837874	0.981784	18.8735	18.4847	1.30933	1.30933	480274	366809	1.30933	480274	366809	1.30933	113464	16.7919
638.3219@4.5709996	3	3	1.94576	1.31876	19.209	19.8582	-1.56839	1.56839	605997	950438	-1.56839	605997	950438	-1.56839	-344440	-18.3939
673.243@4.112	3	3	0.820091	1.0912	19.3585	20.0414	-1.60539	1.60539	672196	1.07914e+06	-1.60539	672196	1.07914e+06	-1.60539	-406942	-18.6345
848.3382@3.6230001	3	3	1.72717	0.395809	19.8119	19.2279	1.49892	1.49892	920379	614029	1.49892	920379	614029	1.49892	306350	18.2248
666.2288@1.6940001	3	3	0.594765	0.229697	19.7856	20.0095	-1.1679	1.1679	903781	1.05553e+06	-1.1679	903781	1.05553e+06	-1.1679	-151749	-17.2113
544.2003@4.1220007	3	3	0.39629	0.754312	19.5986	19.3742	1.16828	1.16828	793907	679552	1.16828	793907	679552	1.16828	114355	16.8032
126.0315@4.9910007	3	3	1.58193	1.34506	19.1591	18.5906	1.48298	1.48298	585423	394761	1.48298	585423	394761	1.48298	190662	17.5407
148.0501@3.1399996	3	3	0.509504	0.150781	20.193	19.9507	1.18289	1.18289	1.19871e+06	1.01337e+06	1.18289	1.19871e+06	1.01337e+06	1.18289	185335	17.4998
1300.472@7.2839994	3	3	0.330457	0.672285	19.106	19.7046	-1.51424	1.51424	564251	854414	-1.51424	564251	854414	-1.51424	-290163	-18.1465
275.1366@4.4329996	3	3	0.75155	0.946847	19.6465	19.3563	1.22275	1.22275	820681	671178	1.22275	820681	671178	1.22275	149502	17.1898
1400.4518@3.9939997	3	3	1.93076	3.77605	18.4776	19.5653	-2.12533	2.12533	365011	775769	-2.12533	365011	775769	-2.12533	-410758	-18.6479
333.0841@5.536999	3	3	2.64516	2.26311	19.3532	17.8424	2.84986	2.84986	669742	235009	2.84986	669742	235009	2.84986	434733	18.7298
216.0478@1.2209998	3	3	0.932533	5.38528	18.26	19.3983	-2.20117	2.20117	313916	690983	-2.20117	313916	690983	-2.20117	-377067	-18.5245
675.1968@3.7540002	3	3	0.608603	0.77934	19.506	19.8565	-1.27494	1.27494	744566	949280	-1.27494	744566	949280	-1.27494	-204714	-17.6432
321.8934@16.520002	3	3	0.621045	0.796307	19.4839	19.8974	-1.33198	1.33198	733215	976627	-1.33198	733215	976627	-1.33198	-243411	-17.893
570.2374@1.2019999	3	3	4.16411	6.76279	19.9697	18.2456	3.30373	3.30373	1.02675e+06	310785	3.30373	1.02675e+06	310785	3.30373	715964	19.4495
1480.5378@5.867	3	3	4.86733	1.31762	22.1514	20.6847	2.7639	2.7639	4.65833e+06	1.68542e+06	2.7639	4.65833e+06	1.68542e+06	2.7639	2.97291e+06	21.5034
236.125@4.2830005	3	3	0.879896	0.259394	17.8501	17.5227	1.25473	1.25473	236273	188306	1.25473	236273	188306	1.25473	47967.3	15.5498
283.1848@4.3499994	3	3	1.47869	0.151797	18.8598	19.2706	-1.32945	1.32945	475736	632467	-1.32945	475736	632467	-1.32945	-156731	-17.2579
234.0888@4.8499994	3	3	1.82757	0.574143	19.047	18.3241	1.65047	1.65047	541638	328172	1.65047	541638	328172	1.65047	213466	17.7036
236.0679@3.8870008	3	3	0.754236	0.958594	19.5228	18.6434	1.83964	1.83964	753268	409464	1.83964	753268	409464	1.83964	343804	18.3912
249.0665@4.0050006	3	3	0.345305	0.757828	19.4772	19.0784	1.31849	1.31849	729852	553549	1.31849	729852	553549	1.31849	176302	17.4277
1111.2151@1.007	3	3	1.0673	1.63935	18.0739	17.3169	1.68996	1.68996	275915	163267	1.68996	275915	163267	1.68996	112648	16.7815
354.0549@3.5569994	3	3	0.107186	0.685087	19.4005	19.1214	1.21345	1.21345	692045	570312	1.21345	692045	570312	1.21345	121733	16.8934
138.0315@5.173	3	3	3.88369	0.710991	17.3761	18.2083	-1.7804	1.7804	170113	302869	-1.7804	170113	302869	-1.7804	-132756	-17.0184
453.2854@9.302001	3	3	6.01268	7.02719	18.7171	21.5733	-7.2412	7.2412	430926	3.12042e+06	-7.2412	430926	3.12042e+06	-7.2412	-2689494	-21.3589
672.3258@3.9799998	3	3	0.385785	0.64379	19.6177	19.2714	1.27135	1.27135	804503	632794	1.27135	804503	632794	1.27135	171709	17.3896
664.0879@8.886001	3	3	1.53144	0.208911	19.5361	18.9909	1.45925	1.45925	760249	520985	1.45925	760249	520985	1.45925	239263	17.8682
108.0574@4.8289995	3	3	0.0870545	0.985182	19.425	19.6898	-1.20146	1.20146	703899	845706	-1.20146	703899	845706	-1.20146	-141807	-17.1136
329.0528@5.3629994	3	3	2.07086	2.71797	19.1065	17.3211	3.44715	3.44715	564462	163747	3.44715	564462	163747	3.44715	400714	18.6122
648.1104@7.3099995	3	3	0.0927242	3.93687	18.8907	17.2938	3.02487	3.02487	486024	160676	3.02487	486024	160676	3.02487	325348	18.3116
206.8471@16.445002	3	3	0.103957	0.217201	19.5105	19.6951	-1.13648	1.13648	746884	848816	-1.13648	746884	848816	-1.13648	-101932	-16.6373
2676.588@0.9209999	3	3	0.72635	2.67748	18.1593	19.3586	-2.29627	2.29627	292740	672211	-2.29627	292740	672211	-2.29627	-379471	-18.5336
598.3322@4.743	3	3	2.39604	5.89175	17.7867	19.1691	-2.60706	2.60706	226108	589477	-2.60706	226108	589477	-2.60706	-363370	-18.4711
408.1028@1.2229999	3	3	0.644389	1.90061	18.9231	17.9801	1.92251	1.92251	497066	258550	1.92251	497066	258550	1.92251	238516	17.8637
665.3581@4.466	3	3	0.228042	1.51904	19.237	19.8662	-1.54673	1.54673	617895	955717	-1.54673	617895	955717	-1.54673	-337823	-18.3659
208.8442@16.447002	3	3	0.328374	0.543501	19.3635	19.5753	-1.15812	1.15812	674507	781160	-1.15812	674507	781160	-1.15812	-106653	-16.7026
249.0258@1.3409997	3	3	0.414568	0.318554	18.6253	18.8498	-1.16834	1.16834	404376	472447	-1.16834	404376	472447	-1.16834	-68070.9	-16.0547
680.1369@7.0759997	3	3	0.851349	3.43822	18.7975	17.0918	3.26182	3.26182	455631	139686	3.26182	455631	139686	3.26182	315945	18.2693
1255.3287@0.9169999	3	3	0.603673	2.57597	18.1382	19.3293	-2.28316	2.28316	288505	658703	-2.28316	288505	658703	-2.28316	-370198	-18.4979
230.1263@3.3940008	3	3	0.346001	0.673938	19.5759	19.371	1.15259	1.15259	781506	678040	1.15259	781506	678040	1.15259	103465	16.6588
505.2373@4.5950003	3	3	2.80446	8.67442	17.0515	18.769	-3.28885	3.28885	135831	446729	-3.28885	135831	446729	-3.28885	-310898	-18.2461
747.2908@3.5979998:1	3	3	1.01149	0.93784	19.0958	19.491	-1.31509	1.31509	560285	736827	-1.31509	560285	736827	-1.31509	-176542	-17.4297
238.0835@5.2309995	3	3	5.77008	1.63061	17.2503	16.0766	2.25585	2.25585	155903	69110.6	2.25585	155903	69110.6	2.25585	86792.4	16.4053
457.1687@4.465	3	3	1.19532	1.8309	18.253	17.6326	1.53726	1.53726	312392	203214	1.53726	312392	203214	1.53726	109178	16.7363
305.9206@16.442999	3	3	0.520579	0.797569	19.2128	19.4781	-1.20184	1.20184	607633	730276	-1.20184	607633	730276	-1.20184	-122643	-16.9041
467.3009@9.538001	3	3	2.95021	5.63151	17.4516	18.7977	-2.5422	2.5422	179246	455679	-2.5422	179246	455679	-2.5422	-276433	-18.0766
220.0589@1.2320001	3	3	1.35341	5.02616	16.6879	17.8184	-2.18934	2.18934	105576	231142	-2.18934	105576	231142	-2.18934	-125566	-16.9381
1160.305@3.82	3	3	0.163754	0.382033	19.2771	19.4794	-1.15053	1.15053	635329	730964	-1.15053	635329	730964	-1.15053	-95634.5	-16.5452
2676.926@0.92399985	3	3	0.458865	2.70306	18.5318	19.5788	-2.06628	2.06628	378981	783081	-2.06628	378981	783081	-2.06628	-404100	-18.6244
234.0527@4.4319997	3	3	1.35906	1.55236	18.7649	17.8293	1.91266	1.91266	445434	232887	1.91266	445434	232887	1.91266	212547	17.6974
508.1619@1.1479999	3	3	0.201807	0.0734579	19.6702	19.4946	1.12943	1.12943	834305	738697	1.12943	834305	738697	1.12943	95608.1	16.5448
216.1108@3.2970006	3	3	0.69799	2.61363	19.6697	19.0206	1.56818	1.56818	833993	531823	1.56818	833993	531823	1.56818	302170	18.205
660.0567@9.027	3	3	0.752432	1.54	18.9323	17.0115	3.78644	3.78644	500261	132119	3.78644	500261	132119	3.78644	368142	18.4899
274.0471@4.466	3	3	1.39458	2.12307	18.8099	17.5986	2.31547	2.31547	459561	198474	2.31547	459561	198474	2.31547	261087	17.9942
741.384@4.6699996	3	3	5.42672	3.23433	16.4509	18.5969	-4.42602	4.42602	89579.6	396481	-4.42602	89579.6	396481	-4.42602	-306901	-18.2274
182.1245@5.813	3	3	0.109434	0.398558	19.2611	19.415	-1.11255	1.11255	628310	699029	-1.11255	628310	699029	-1.11255	-70718.9	-16.1098
260.0683@5.174	3	3	1.11084	0.708361	18.6598	17.9695	1.61356	1.61356	414147	256666	1.61356	414147	256666	1.61356	157480	17.2648
888.3991@4.5180006	3	3	1.01482	2.12511	18.913	17.593	2.49662	2.49662	493601	197708	2.49662	493601	197708	2.49662	295894	18.1747
178.0399@1.1669999	3	3	0.503595	1.46808	19.3234	18.9276	1.31567	1.31567	656027	498625	1.31567	656027	498625	1.31567	157402	17.2641
282.1059@3.5230002	3	3	0.082944	0.22243	19.2765	19.0705	1.15351	1.15351	635051	550537	1.15351	635051	550537	1.15351	84513.5	16.3669
279.0951@1.231	3	3	1.05397	0.587011	18.1611	18.5244	-1.28643	1.28643	293106	377062	-1.28643	293106	377062	-1.28643	-83955.9	-16.3573
996.595@4.861	3	3	1.34468	2.01003	19.7512	18.9109	1.79037	1.79037	882456	492892	1.79037	882456	492892	1.79037	389565	18.5715
666.1209@6.2009997	3	3	0.562362	0.591357	19.279	17.9263	2.55386	2.55386	636146	249091	2.55386	636146	249091	2.55386	387054	18.5622
1437.4961@7.4570003	3	3	0.444241	1.37559	19.0998	19.9293	-1.77715	1.77715	561832	998461	-1.77715	561832	998461	-1.77715	-436629	-18.736
295.0321@5.228	3	3	0.70953	0.800029	19.0925	18.69	1.32179	1.32179	558988	422903	1.32179	558988	422903	1.32179	136086	17.0542
574.2587@3.7389998	3	3	0.681568	0.211948	18.6107	18.9952	-1.30546	1.30546	400280	522551	-1.30546	400280	522551	-1.30546	-122271	-16.8997
2590.6233@0.9110002	3	3	0.540108	2.02476	18.1888	19.2083	-2.02727	2.02727	298790	605727	-2.02727	298790	605727	-2.02727	-306937	-18.2276
422.1894@3.2029994	3	3	1.91034	0.4346	19.4076	18.9459	1.37722	1.37722	695476	504986	1.37722	695476	504986	1.37722	190489	17.5393
1598.4805@5.7190003	3	3	0.826004	0.932226	19.2591	18.7147	1.45844	1.45844	627445	430217	1.45844	627445	430217	1.45844	197229	17.5895
3212.7258@0.92799985	3	3	0.652575	2.33696	18.7141	19.6017	-1.85003	1.85003	430051	795609	-1.85003	430051	795609	-1.85003	-365558	-18.4797
486.2309@4.187	3	3	0.691455	0.981178	18.7461	19.3111	-1.47941	1.47941	439670	650451	-1.47941	439670	650451	-1.47941	-210781	-17.6854
531.179@1.6070002	3	3	2.29697	0.387159	18.5194	19.4211	-1.86822	1.86822	375755	701992	-1.86822	375755	701992	-1.86822	-326237	-18.3156
568.1152@3.4699998	3	3	0.260188	0.0550768	19.1723	19.3252	-1.11184	1.11184	590793	656866	-1.11184	590793	656866	-1.11184	-66073	-16.0118
327.1791@4.5400004	3	3	1.65578	1.14731	17.8249	18.5498	-1.6528	1.6528	232176	383742	-1.6528	232176	383742	-1.6528	-151565	-17.2096
2768.5693@0.922	3	3	0.607317	2.16788	18.5881	19.3999	-1.75533	1.75533	394075	691732	-1.75533	394075	691732	-1.75533	-297658	-18.1833
270.1275@1.217	3	3	0.59912	0.5845	19.0385	19.269	-1.1732	1.1732	538470	631734	-1.1732	538470	631734	-1.1732	-93263.4	-16.509
461.2011@4.0999994	3	3	0.911281	0.778991	18.8866	18.4929	1.31374	1.31374	484665	368920	1.31374	484665	368920	1.31374	115745	16.8206
2145.5251@0.9169999	3	3	0.590021	2.33139	18.1563	19.209	-2.0745	2.0745	292135	606036	-2.0745	292135	606036	-2.0745	-313901	-18.2599
526.117@1.6200001	3	3	1.31184	0.492651	18.8896	19.2383	-1.27342	1.27342	485658	618449	-1.27342	485658	618449	-1.27342	-132791	-17.0188
1320.4863@4.105	3	3	0.875327	2.06421	18.7513	19.4194	-1.58898	1.58898	441278	701181	-1.58898	441278	701181	-1.58898	-259903	-17.9876
810.2303@0.92399985	3	3	0.811087	3.11314	17.8075	19.0611	-2.38421	2.38421	229405	546950	-2.38421	229405	546950	-2.38421	-317545	-18.2766
298.1039@4.236	3	3	0.756459	2.13914	18.4325	17.6006	1.78007	1.78007	353779	198745	1.78007	353779	198745	1.78007	155034	17.2422
734.3471@4.883	3	3	1.59831	2.03443	17.7581	18.5101	-1.68414	1.68414	221670	373323	-1.68414	221670	373323	-1.68414	-151653	-17.2104
643.0956@7.6880007	3	3	0.58427	1.92154	18.6943	17.0002	3.23569	3.23569	424179	131094	3.23569	424179	131094	3.23569	293085	18.161
542.0494@1.1569998	3	3	0.0344195	5.03342	21.4886	20.2988	2.28127	2.28127	2.94247e+06	1.28984e+06	2.28127	2.94247e+06	1.28984e+06	2.28127	1652630	20.6563
701.2795@4.103	3	3	2.05809	2.78463	18.689	17.8346	1.80796	1.80796	422617	233753	1.80796	422617	233753	1.80796	188864	17.527
333.1656@3.7799997	3	3	0.659802	0.32293	18.126	18.4137	-1.22072	1.22072	286061	349201	-1.22072	286061	349201	-1.22072	-63140	-15.9463
168.0785@5.7809997	3	3	1.03258	1.4496	18.3817	19.1394	-1.69081	1.69081	341546	577490	-1.69081	341546	577490	-1.69081	-235944	-17.8481
909.2961@3.1499999	3	3	1.74259	2.79612	18.2566	17.5236	1.66208	1.66208	313167	188419	1.66208	313167	188419	1.66208	124748	16.9287
2856.635@0.9209999	3	3	0.61065	1.93117	18.1377	19.1049	-1.95504	1.95504	288399	563831	-1.95504	288399	563831	-1.95504	-275432	-18.0713
3211.102@0.926	3	3	0.879028	2.61708	17.8788	18.9275	-2.06867	2.06867	241021	498594	-2.06867	241021	498594	-2.06867	-257572	-17.9746
344.1575@4.8930006	3	3	0.674565	0.708167	19.3651	19.7603	-1.31512	1.31512	675266	888058	-1.31512	675266	888058	-1.31512	-212791	-17.6991
1517.5374@0.9169999	3	3	0.814668	2.69126	17.6514	18.8471	-2.29057	2.29057	205873	471568	-2.29057	205873	471568	-2.29057	-265694	-18.0194
230.1253@4.278	3	3	0.885448	0.667314	20.2555	20.9217	-1.58688	1.58688	1.25178e+06	1.98642e+06	-1.58688	1.25178e+06	1.98642e+06	-1.58688	-734642	-19.4867
434.1167@1.2340001	3	3	0.756499	1.98097	18.8768	19.4079	-1.44505	1.44505	481374	695610	-1.44505	481374	695610	-1.44505	-214236	-17.7088
671.1787@1.257	3	3	1.9633	1.18982	19.5398	18.9996	1.45409	1.45409	762175	524160	1.45409	762175	524160	1.45409	238014	17.8607
988.1738@0.915	3	3	0.969999	2.68906	17.7505	18.8022	-2.07303	2.07303	220510	457126	-2.07303	220510	457126	-2.07303	-236615	-17.8522
522.2296@1.156	3	3	0.204992	1.05558	18.6048	19.0506	-1.36205	1.36205	398674	543014	-1.36205	398674	543014	-1.36205	-144341	-17.1391
1109.6592@4.9879994	3	3	1.40184	1.85773	18.7051	18.0377	1.58821	1.58821	427357	269081	1.58821	427357	269081	1.58821	158276	17.2721
527.054@5.139	3	3	1.55639	4.46824	18.1526	17.1563	1.995	1.995	291400	146065	1.995	291400	146065	1.995	145334	17.149
389.1785@3.3759997	3	3		4.51038	16.2204	0	76351.3	76351.3	76351.3	1	76351.3	76351.3	1	76351.3	76350.3	16.2203
322.1014@4.9669995	3	3	1.01782	2.55819	18.0092	18.6897	-1.60269	1.60269	263823	422826	-1.60269	263823	422826	-1.60269	-159004	-17.2787
584.3523@3.7910001	3	3	2.41765	2.60808	17.6057	18.4737	-1.82504	1.82504	199459	364021	-1.82504	199459	364021	-1.82504	-164562	-17.3283
1433.273@0.9209999	3	3	0.940801	2.91692	18.02	19.2724	-2.38233	2.38233	265810	633246	-2.38233	265810	633246	-2.38233	-367436	-18.4871
2692.828@4.882	3	3	1.95214	2.0181	18.7263	17.9818	1.67537	1.67537	433686	258860	1.67537	433686	258860	1.67537	174825	17.4156
306.1096@5.471	3	3	0.72291	0.719244	18.7786	18.0555	1.65067	1.65067	449687	272427	1.65067	449687	272427	1.65067	177260	17.4355
414.2105@4.097	3	3	1.01579	0.933645	20.0596	19.689	1.29293	1.29293	1092821	845227	1.29293	1092821	845227	1.29293	247594	17.9176
3211.0652@0.926	3	3	0.873515	2.657	17.8724	18.9309	-2.08276	2.08276	239953	499765	-2.08276	239953	499765	-2.08276	-259812	-17.9871
465.2851@8.802001	3	3	3.07477	9.42623	17.3809	19.3622	-3.94834	3.94834	170678	673893	-3.94834	170678	673893	-3.94834	-503215	-18.9408
1517.1367@0.915	3	3	0.548792	2.52279	18.1355	19.1107	-1.96593	1.96593	287951	566092	-1.96593	287951	566092	-1.96593	-278140	-18.0855
291.0886@3.3969996	3	3	0.0801967	0.432009	18.1131	17.4707	1.56096	1.56096	283531	181639	1.56096	283531	181639	1.56096	101892	16.6367
352.1918@8.083	3	3	173.205	2.7972	15.2446	5.27074	1005.64	1005.64	38823.5	38.6057	1005.64	38823.5	38.6057	1005.64	38784.9	15.2432
287.1922@3.139	3	3	4.23605	0.652857	19.5379	18.6053	1.90873	1.90873	761180	398790	1.90873	761180	398790	1.90873	362390	18.4672
317.1576@3.5020003	3	3	0.530743	0.379	16.2302	15.7839	1.36255	1.36255	76875.3	56420.2	1.36255	76875.3	56420.2	1.36255	20455.1	14.3202
495.0824@5.118	3	3	1.01636	0.595335	18.9008	18.3754	1.4393	1.4393	489451	340062	1.4393	489451	340062	1.4393	149389	17.1887
988.2075@1.0080001	3	3	0.739316	1.00592	18.6628	18.1301	1.44669	1.44669	415018	286873	1.44669	415018	286873	1.44669	128145	16.9674
1428.118@0.91300005	3	3	0.496474	2.4144	18.1509	19.0513	-1.86664	1.86664	291041	543269	-1.86664	291041	543269	-1.86664	-252228	-17.9444
1194.325@3.3840003	3	3	1.04698	12.8612	15.8491	18.9969	-8.86289	8.86289	59028.2	523161	-8.86289	59028.2	523161	-8.86289	-464133	-18.8242
331.1305@3.407	3	3	2.32241	0.243017	19.2009	18.6419	1.47325	1.47325	602629	409046	1.47325	602629	409046	1.47325	193583	17.5626
2677.2617@0.9139999	3	3	0.71466	2.55697	18.2424	19.3253	-2.11826	2.11826	310107	656888	-2.11826	310107	656888	-2.11826	-346781	-18.4037
662.0718@8.792	3	3	0.239312	1.65473	19.1099	18.2983	1.7551	1.7551	565780	322364	1.7551	565780	322364	1.7551	243416	17.8931
1517.739@0.91300005	3	3	0.939853	2.8798	17.6208	18.7236	-2.14766	2.14766	201552	432865	-2.14766	201552	432865	-2.14766	-231313	-17.8195
2690.2407@0.9209999	3	3	0.575547	2.19029	18.0599	18.9006	-1.79091	1.79091	273263	489391	-1.79091	273263	489391	-1.79091	-216128	-17.7215
168.0412@3.6230001	3	3	2.40205	0.895853	17.3928	18.6073	-2.32056	2.32056	172091	399346	-2.32056	172091	399346	-2.32056	-227255	-17.794
543.0753@0.9139999	3	3	0.74941	3.42232	16.9555	18.5858	-3.09578	3.09578	127089	393439	-3.09578	127089	393439	-3.09578	-266350	-18.023
960.4271@4.381	3	3	0.721684	3.52499	18.6744	17.8487	1.77237	1.77237	418369	236051	1.77237	418369	236051	1.77237	182318	17.4761
193.0137@4.1009994	3	3	1.71318	0.982187	16.3028	16.9213	-1.53529	1.53529	80842.2	124116	-1.53529	80842.2	124116	-1.53529	-43274.3	-15.4012
1428.5186@0.915	3	3	0.262141	2.15285	17.9076	18.8409	-1.90963	1.90963	245886	469551	-1.90963	245886	469551	-1.90963	-223665	-17.771
990.3832@8.270999	3	3	0.602877	1.88106	18.7673	19.7199	-1.93545	1.93545	446178	863556	-1.93545	446178	863556	-1.93545	-417378	-18.671
368.1424@4.0670004	3	3	4.86299	0.949684	17.6321	16.5496	2.11775	2.11775	203145	95925.2	2.11775	203145	95925.2	2.11775	107220	16.7102
125.0434@3.343	3	3	1.2158	1.43805	17.6064	18.0573	-1.36687	1.36687	199557	272769	-1.36687	199557	272769	-1.36687	-73211.6	-16.1598
2528.5603@0.9209999	3	3	1.19587	2.35674	17.4723	18.626	-2.2248	2.2248	181841	404559	-2.2248	181841	404559	-2.2248	-222718	-17.7649
125.0454@3.35	3	3	0.671702	0.738269	18.7142	18.2268	1.40186	1.40186	430063	306780	1.40186	430063	306780	1.40186	123283	16.9116
294.0733@3.9739993	3	3	1.5776	1.91721	18.3133	17.7241	1.50436	1.50436	325723	216520	1.50436	325723	216520	1.50436	109204	16.7367
2528.896@0.9209999	3	3	0.706379	2.28248	17.5476	18.7662	-2.32719	2.32719	191578	445840	-2.32719	191578	445840	-2.32719	-254262	-17.956
374.1789@3.6189997	3	3	2.02324	1.1005	17.7756	18.4579	-1.60464	1.60464	224385	360058	-1.60464	224385	360058	-1.60464	-135673	-17.0498
1562.1@5.1930003	3	3	0.363613	0.851326	18.9359	18.7009	1.17695	1.17695	501515	426113	1.17695	501515	426113	1.17695	75401.8	16.2023
354.0497@4.9910007	3	3	1.82451	1.72273	17.9993	17.4184	1.49571	1.49571	262011	175175	1.49571	262011	175175	1.49571	86836.3	16.406
302.1472@3.7939997	3	3	1.43112	2.83832	18.2897	19.0097	-1.64723	1.64723	320434	527829	-1.64723	320434	527829	-1.64723	-207396	-17.662
249.086@1.231	3	3	0.26176	0.734322	19.4568	19.1329	1.25171	1.25171	719565	574866	1.25171	719565	574866	1.25171	144699	17.1427
278.1724@3.9850004	3	3	0.213269	0.261427	18.1267	18.384	-1.19527	1.19527	286198	342083	-1.19527	286198	342083	-1.19527	-55885.2	-15.7702
1616.7308@0.9209999	3	3	0.21215	1.68256	18.4269	19.1113	-1.60697	1.60697	352415	566320	-1.60697	352415	566320	-1.60697	-213905	-17.7066
848.3384@3.6290002	3	3	3.08268	0.397039	19.8016	19.0884	1.63943	1.63943	913853	557421	1.63943	913853	557421	1.63943	356433	18.4433
496.1169@1.212	3	3	2.83639	17.7456	12.5696	15.123	-5.87018	5.87018	6078.81	35683.7	-5.87018	6078.81	35683.7	-5.87018	-29604.9	-14.8536
126.0318@4.0260005	3	3	1.56561	0.905855	18.3546	17.9677	1.30759	1.30759	335187	256339	1.30759	335187	256339	1.30759	78848.4	16.2668
368.16@4.0680003	3	3	1.11457	0.439048	18.2335	17.9633	1.20597	1.20597	308202	255562	1.20597	308202	255562	1.20597	52639.2	15.6838
657.213@3.0410001	3	3	0.682199	0.504719	17.7837	17.3575	1.34364	1.34364	225644	167935	1.34364	225644	167935	1.34364	57708.8	15.8165
234.0493@4.431	3	3	1.16124	1.7646	18.8163	17.9363	1.84034	1.84034	461602	250824	1.84034	461602	250824	1.84034	210778	17.6854
1878.37@0.916	3	3	1.23983	2.81442	17.3618	18.7094	-2.54488	2.54488	168436	428649	-2.54488	168436	428649	-2.54488	-260214	-17.9893
518.232@1.618	3	3	0.499423	0.910889	18.873	19.3373	-1.37966	1.37966	480099	662372	-1.37966	480099	662372	-1.37966	-182273	-17.4757
2322.5505@0.915	3	3	1.15674	2.83558	17.3837	18.6351	-2.38083	2.38083	171003	407129	-2.38083	171003	407129	-2.38083	-236126	-17.8492
1574.483@5.6860003	3	3	2.41953	3.14515	18.7003	17.6181	2.11726	2.11726	425943	201177	2.11726	425943	201177	2.11726	224767	17.7781
2694.5698@0.90699995	3	3	0.290917	1.52982	18.1314	18.7376	-1.52224	1.52224	287150	437110	-1.52224	287150	437110	-1.52224	-149960	-17.1942
1552.7017@4.6160007	3	3	4.26746	1.54153	15.6137	16.9404	-2.50833	2.50833	50141.4	125771	-2.50833	50141.4	125771	-2.50833	-75629.9	-16.2067
619.2661@4.9220004	3	3	0.0205195	0.665217	17.7826	18.3448	-1.47656	1.47656	225474	332927	-1.47656	225474	332927	-1.47656	-107453	-16.7133
1711.5619@3.9619994	3	3	1.0197	2.40435	18.2589	19.0771	-1.76314	1.76314	313678	553058	-1.76314	313678	553058	-1.76314	-239380	-17.8689
2528.225@0.91800016	3	3	1.09392	2.98115	17.5341	18.6838	-2.21867	2.21867	189800	421103	-2.21867	189800	421103	-2.21867	-231304	-17.8194
388.1474@4.721	3	3	1.16523	1.71739	18.5637	17.9829	1.49573	1.49573	387465	259046	1.49573	387465	259046	1.49573	128418	16.9705
295.0898@1.2340001	3	3	1.0209	1.88558	17.7017	18.377	-1.5969	1.5969	213175	340419	-1.5969	213175	340419	-1.5969	-127244	-16.9572
244.1256@5.195	3	3	0.64711	1.73022	17.1707	16.2036	1.95498	1.95498	147537	75467.4	1.95498	147537	75467.4	1.95498	72070	16.1371
1614.4484@5.7190003	3	3	2.5713	1.40242	19.2544	18.4287	1.77239	1.77239	625375	352844	1.77239	625375	352844	1.77239	272532	18.0561
442.2658@4.5100007	3	3	4.64999	0.697081	21.8384	20.7189	2.17277	2.17277	3749846	1.72584e+06	2.17277	3749846	1.72584e+06	2.17277	2.02401e+06	20.9488
325.1634@4.375	3	3	4.79204	1.50655	16.1525	17.1423	-1.98599	1.98599	72842.2	144664	-1.98598	72842.2	144664	-1.98598	-71821.3	-16.1321
576.2182@7.848	3	3	0.893212	4.20831	17.7113	19.3281	-3.06697	3.06697	214605	658185	-3.06697	214605	658185	-3.06697	-443581	-18.7588
584.3523@4.444	3	3	1.13106	1.41744	18.1897	18.654	-1.37969	1.37969	298973	412489	-1.37969	298973	412489	-1.37969	-113516	-16.7925
662.2643@3.792	3	3	0.626051	0.747344	18.4283	18.737	-1.23857	1.23857	352761	436919	-1.23857	352761	436919	-1.23857	-84157.7	-16.3608
312.2306@7.4430003	3	3	1.51949	1.19518	17.8081	17.2594	1.46279	1.46279	229492	156887	1.46279	229492	156887	1.46279	72605.1	16.1478
1428.7189@0.9209999	3	3	0.625219	3.00448	17.5071	18.6025	-2.13674	2.13674	186277	398025	-2.13674	186277	398025	-2.13674	-211748	-17.692
218.0575@5.5229993	3	3	1.11441	1.00158	18.2875	17.7112	1.49101	1.49101	319950	214585	1.49101	319950	214585	1.49101	105364	16.685
1606.7587@0.9209999	3	3	0.852739	3.31164	17.349	18.6583	-2.47822	2.47822	166946	413728	-2.47822	166946	413728	-2.47822	-246782	-17.9129
172.0787@3.4480002	3	3	1.28642	3.94799	18.114	19.0085	-1.85896	1.85896	283701	527389	-1.85896	283701	527389	-1.85896	-243687	-17.8947
377.2247@4.2620006	3	3	1.31049	0.401606	18.3015	17.938	1.28655	1.28655	323078	251120	1.28655	323078	251120	1.28655	71957.7	16.1349
1617.143@0.923	3	3	0.533191	2.03297	18.0537	18.7725	-1.64573	1.64573	272091	447788	-1.64573	272091	447788	-1.64573	-175698	-17.4227
609.1845@6.8769994	3	3	1.09076	1.23523	18.7668	18.3801	1.3074	1.3074	446049	341173	1.3074	446049	341173	1.3074	104877	16.6783
308.0083@16.352999	3	3	7.70984	2.47381	18.6369	17.0715	2.95975	2.95975	407642	137728	2.95975	407642	137728	2.95975	269913	18.0421
615.2007@1.212	3	3	0.537285	0.37804	19.3018	19.1063	1.14512	1.14512	646275	564374	1.14512	646275	564374	1.14512	81900.6	16.3216
612.0523@1.8099996	3	3	173.205	8.35858	11.6301	4.00537	197.367	197.367	3169.64	16.0597	197.367	3169.64	16.0597	197.367	3153.58	11.6228
887.051@15.563003	3	3		88.4143	9.50099	0	724.572	724.572	724.572	1	724.572	724.572	1	724.572	723.572	9.49899
289.943@1.009	3	3	1.18634	1.75876	16.7591	16.2772	1.39655	1.39655	110915	79420.8	1.39655	110915	79420.8	1.39655	31494.1	14.9428
814.3142@7.825	3	3	1.21014	6.17136	16.7389	17.9037	-2.242	2.242	109375	245219	-2.242	109375	245219	-2.242	-135844	-17.0516
910.4165@8.475999	3	3	0.984826	1.53972	18.3553	19.0669	-1.63759	1.63759	335359	549182	-1.63759	335359	549182	-1.63759	-213823	-17.7061
890.6074@4.8569994	3	3	0.89829	0.461326	18.2726	17.6954	1.49194	1.49194	316661	212248	1.49194	316661	212248	1.49194	104413	16.6719
640.3371@4.466	3	3	0.8116	2.08503	18.1667	18.9134	-1.67796	1.67796	294249	493739	-1.67796	294249	493739	-1.67796	-199490	-17.606
446.2365@4.4220004	3	3	0.794924	2.45206	17.939	18.5684	-1.54695	1.54695	251294	388740	-1.54695	251294	388740	-1.54695	-137446	-17.0685
147.053@1.6280001	3	3	1.0906	1.76034	18.4051	17.8817	1.43731	1.43731	347124	241510	1.43731	347124	241510	1.43731	105614	16.6884
501.3153@3.94	3	3	3.08977	3.44762	17.3006	18.3527	-2.07357	2.07357	161439	334754	-2.07357	161439	334754	-2.07357	-173315	-17.403
145.0523@5.418999	3	3	0.20264	0.787283	15.3444	16.2391	-1.85914	1.85914	41603.9	77347.6	-1.85914	41603.9	77347.6	-1.85914	-35743.7	-15.1254
981.6689@4.895	3	3	1.2235	1.17053	16.897	16.4807	1.33451	1.33451	122043	91451.9	1.33451	122043	91451.9	1.33451	30591.5	14.9008
253.1539@3.202	3	3	0.144079	0.476553	18.6148	18.4446	1.1252	1.1252	401432	356765	1.1252	401432	356765	1.1252	44667	15.4469
236.1134@3.4690003	3	3	2.93155	1.27905	18.5727	17.5244	2.0681	2.0681	389897	188529	2.0681	389897	188529	2.0681	201368	17.6195
654.3079@11.379998	3	3	0.998561	1.28464	18.9549	18.4954	1.37506	1.37506	508157	369552	1.37506	508157	369552	1.37506	138606	17.0806
324.1599@7.152	3	3	173.205	7.14277	16.0828	5.34472	1708	1708	69407.7	40.6369	1708	69407.7	40.6369	1708	69367	16.082
3346.2036@0.9209999	3	3	0.79754	3.01797	17.7066	18.7209	-2.0198	2.0198	213911	432057	-2.0198	213911	432057	-2.0198	-218146	-17.7349
1335.2931@0.91300005	3	3	0.824743	2.75314	17.6948	18.8248	-2.18859	2.18859	212161	464335	-2.18859	212161	464335	-2.18859	-252173	-17.9441
360.018@16.358997	3	3	4.10612	5.49393	16.6988	18.2481	-2.92662	2.92662	106377	311326	-2.92662	106377	311326	-2.92662	-204949	-17.6449
328.0136@16.378002	3	3	173.205	3.20495	18.5108	6.32912	4645.77	4645.77	373519	80.3996	4645.78	373519	80.3996	4645.78	373438	18.5105
242.1262@3.3530004	3	3	0.571588	2.62238	18.3781	19.0861	-1.63353	1.63353	340691	556528	-1.63353	340691	556528	-1.63353	-215838	-17.7196
868.1989@1.5749999	3	3	0.953477	0.220513	19.1983	18.9076	1.22319	1.22319	601521	491765	1.22319	601521	491765	1.22319	109756	16.7439
1517.9397@0.9169999	3	3	0.715833	2.68491	17.4848	18.494	-2.01282	2.01282	183421	369194	-2.01282	183421	369194	-2.01282	-185773	-17.5032
803.6724@0.923	3	3	1.65928	1.79806	16.8524	17.7946	-1.92135	1.92135	118329	227352	-1.92135	118329	227352	-1.92135	-109023	-16.7343
620.3283@4.445	3	3	1.73607	1.61185	18.0538	18.554	-1.41446	1.41446	272096	384869	-1.41446	272096	384869	-1.41446	-112773	-16.7831
196.1201@6.2999997	3	3	0.34571	0.519451	17.8274	18.0955	-1.20424	1.20424	232590	280093	-1.20424	232590	280093	-1.20424	-47503.6	-15.5357
1438.6997@0.923	3	3	0.273673	1.15791	17.881	18.166	-1.21837	1.21837	241393	294105	-1.21837	241393	294105	-1.21837	-52712.5	-15.6859
2322.5168@0.915	3	3	1.07314	2.55279	17.7739	18.9144	-2.20455	2.20455	224123	494090	-2.20455	224123	494090	-2.20455	-269968	-18.0424
228.0196@4.493	3	3	1.02577	1.7253	16.2996	16.719	-1.33738	1.33738	80662.3	107876	-1.33738	80662.3	107876	-1.33738	-27213.8	-14.732
173.1017@4.5929995	3	3	0.346712	0.288205	18.1058	17.9325	1.12762	1.12762	282085	250159	1.12762	282085	250159	1.12762	31925.3	14.9624
1527.7194@0.922	3	3	0.618791	1.42144	18.4255	18.8645	-1.35572	1.35572	352063	477301	-1.35572	352063	477301	-1.35572	-125238	-16.9343
2850.6218@0.926	3	3	0.605598	2.68632	18.0698	18.9941	-1.89772	1.89772	275145	522148	-1.89772	275145	522148	-1.89772	-247003	-17.9142
436.2091@4.3030005	3	3	2.42364	4.31405	16.373	17.8031	-2.69478	2.69478	84869.9	228705	-2.69478	84869.9	228705	-2.69478	-143836	-17.1341
399.1372@1.2110001	3	3	6.20652	8.46486	14.8169	16.6535	-3.5716	3.5716	28862.7	103086	-3.5716	28862.7	103086	-3.5716	-74223.3	-16.1796
294.0825@4.0540004	3	3	0.391736	0.724377	18.3241	18.098	1.16966	1.16966	328166	280566	1.16966	328166	280566	1.16966	47600.4	15.5387
1536.5238@5.5820003	3	3	0.363463	0.425608	18.8731	18.6525	1.16523	1.16523	480151	412065	1.16523	480151	412065	1.16523	68086.3	16.0551
585.2012@1.2229999	3	3	0.477715	0.580036	19.3283	19.5343	-1.15351	1.15351	658239	759287	-1.15351	658239	759287	-1.15351	-101048	-16.6247
311.8648@16.442999	3	3	0.574004	0.252743	18.6841	18.866	-1.13441	1.13441	421190	477800	-1.13441	421190	477800	-1.13441	-56610.8	-15.7888
1004.6935@4.876	3	3	1.09027	0.241327	19.5088	19.1151	1.31375	1.31375	745969	567816	1.31375	745969	567816	1.31375	178154	17.4428
352.0754@4.3860006	3	3	0.207599	1.94506	18.2781	18.793	-1.42884	1.42884	317879	454198	-1.42884	317879	454198	-1.42884	-136319	-17.0566
1616.941@0.91300005	3	3	0.267653	2.02331	18.3744	18.9418	-1.48191	1.48191	339809	503565	-1.48191	339809	503565	-1.48191	-163756	-17.3212
1605.7046@0.9209999	3	3	0.629247	2.43315	18.1476	19.1974	-2.07016	2.07016	290389	601151	-2.07016	290389	601151	-2.07016	-310763	-18.2455
218.0605@5.187	3	3	0.736818	1.27159	18.7697	18.3582	1.33009	1.33009	446942	336025	1.33009	446942	336025	1.33009	110917	16.7591
599.2157@1.2320001	3	3	1.15286	0.273717	17.7952	18.0966	-1.23239	1.23239	227448	280306	-1.23239	227448	280306	-1.23239	-52857.7	-15.6898
233.0352@3.567	3	3	0.21495	0.239739	18.646	18.4583	1.13899	1.13899	410222	360163	1.13899	410222	360163	1.13899	50058.7	15.6113
495.1914@8.270999:1	3	3	0.733501	1.46745	18.3964	19.4233	-2.03752	2.03752	345050	703045	-2.03752	345050	703045	-2.03752	-357996	-18.4496
1229.4342@1.2110001	3	3	0.971903	1.71591	19.2578	18.8139	1.36028	1.36028	626853	460825	1.36028	626853	460825	1.36028	166028	17.3411
262.1697@4.5919995	3	3	2.7434	1.50272	19.7384	18.9025	1.78497	1.78497	874665	490017	1.78497	874665	490017	1.78497	384648	18.5532
258.0035@16.367998	3	3	4.91501	1.27772	17.3762	19.751	-5.18663	5.18663	170127	882384	-5.18663	170127	882384	-5.18663	-712257	-19.442
634.3062@4.743	3	3	2.84928	2.20825	17.1823	18.1855	-2.0044	2.0044	148728	298109	-2.0044	148728	298109	-2.0044	-149381	-17.1886
427.0381@10.512	3	3	1.51235	0.847678	18.3194	17.767	1.46647	1.46647	327095	223049	1.46647	327095	223049	1.46647	104046	16.6669
1606.1544@0.92399985	3	3	0.766394	3.56249	17.5586	18.7434	-2.27325	2.27325	193054	438860	-2.27325	193054	438860	-2.27325	-245806	-17.9072
470.0862@1.243	3	3	0.48627	0.11164	18.6658	18.4747	1.14162	1.14162	415867	364276	1.14162	415867	364276	1.14162	51590.3	15.6548
181.9068@16.552	3	3	0.322678	0.400328	18.7749	18.9959	-1.16558	1.16558	448534	522801	-1.16558	448534	522801	-1.16558	-74266.3	-16.1804
1185.4283@3.685	3	3	1.56751	2.62553	18.1223	18.7782	-1.57549	1.57549	285345	449559	-1.57549	285345	449559	-1.57549	-164214	-17.3252
1146.2963@1.3520001	3	3	2.62865	0.216383	19.627	19.0301	1.51248	1.51248	809677	535330	1.51248	809677	535330	1.51248	274347	18.0656
1600.5302@3.9710004	3	3	0.225969	0.81703	18.9204	19.1473	-1.17038	1.17038	496130	580659	-1.17038	496130	580659	-1.17038	-84528.8	-16.3672
600.2179@1.6930001	3	3	1.86354	3.77618	16.7801	17.9005	-2.17421	2.17421	112538	244682	-2.17421	112538	244682	-2.17421	-132144	-17.0117
1672.7642@5.5800004	3	3	0.435415	2.26632	17.8892	18.4681	-1.49374	1.49374	242759	362619	-1.49374	242759	362619	-1.49374	-119860	-16.871
663.3337@4.466	3	3	0.474903	1.39383	18.8256	19.4616	-1.55401	1.55401	464576	721957	-1.55401	464576	721957	-1.55401	-257381	-17.9735
2688.5867@0.91300005	3	3	0.458469	2.10291	17.7593	18.5865	-1.77418	1.77418	221865	393628	-1.77418	221865	393628	-1.77418	-171763	-17.3901
460.2093@8.28	3	3	1.38072	3.3252	18.3217	17.542	1.71678	1.71678	327621	190834	1.71678	327621	190834	1.71678	136787	17.0616
212.0681@3.8759997	3	3	0.628276	1.32331	18.3744	18.0504	1.25183	1.25183	339824	271461	1.25183	339824	271461	1.25183	68363.2	16.0609
230.1259@3.817	3	3	0.573529	0.622326	17.623	17.3707	1.19109	1.19109	201854	169470	1.19109	201854	169470	1.19109	32384.4	14.983
255.0816@3.8349993	3	3	2.09118	0.835541	17.9491	17.0116	1.91526	1.91526	253065	132131	1.91526	253065	132131	1.91526	120934	16.8839
386.1067@3.2579997	3	3	0.460962	0.594976	17.8412	18.3899	-1.46274	1.46274	234827	343490	-1.46274	234827	343490	-1.46274	-108663	-16.7295
117.0577@4.861	3	3	0.723656	1.83085	17.9501	18.4135	-1.37883	1.37883	253228	349158	-1.37883	253228	349158	-1.37883	-95930	-16.5497
838.4457@4.883	3	3	1.16607	0.781045	18.8264	18.4369	1.30995	1.30995	464863	354871	1.30995	464863	354871	1.30995	109992	16.747
102.0545@1.2530001	3	3	1.59542	1.24509	17.924	17.4788	1.36152	1.36152	248686	182654	1.36152	248686	182654	1.36152	66032.2	16.0109
708.1222@7.9199986	3	3	3.35894	3.00647	17.9197	17.0221	1.86299	1.86299	247950	133093	1.86299	247950	133093	1.86299	114857	16.8095
624.1499@1.8	3	3	0.345834	1.77994	17.6993	18.2945	-1.51073	1.51073	212822	321515	-1.51073	212822	321515	-1.51073	-108693	-16.7299
811.2682@1.2489998	3	3	0.365401	0.504325	18.4013	18.0935	1.23785	1.23785	346218	279693	1.23785	346218	279693	1.23785	66525.4	16.0216
3076.6914@0.92	3	3	0.328054	1.44252	18.419	18.9005	-1.39622	1.39622	350481	489350	-1.39622	350481	489350	-1.39622	-138869	-17.0834
665.136@5.2760005	3	3	0.842433	1.47727	18.2652	17.4104	1.8085	1.8085	315038	174199	1.8085	315038	174199	1.8085	140839	17.1037
262.1199@5.4700007	3	3	0.922727	0.542409	18.2879	17.6671	1.5377	1.5377	320041	208129	1.5377	320041	208129	1.5377	111911	16.772
1528.3229@0.923	3	3	0.266184	1.49954	18.2156	18.6817	-1.38139	1.38139	304394	420488	-1.38139	304394	420488	-1.38139	-116094	-16.8249
204.097@3.9949992	3	3	5.26674	173.205	5.69537	17.8567	-4580.57	4580.57	51.8175	237354	-4580.57	51.8175	237354	-4580.57	-237302	-17.8564
3114.6519@0.92399985	3	3	0.18627	1.96528	17.6806	18.5251	-1.79563	1.79563	210089	377242	-1.79563	210089	377242	-1.79563	-167153	-17.3508
1439.101@0.92399985	3	3	0.370243	1.34776	18.1898	18.6457	-1.37168	1.37168	298994	410125	-1.37168	298994	410125	-1.37168	-111131	-16.7619
2358.083@5.5610003	3	3	0.125511	1.09717	17.9508	18.4958	-1.459	1.459	253358	369650	-1.459	253358	369650	-1.459	-116292	-16.8274
536.1587@1.1809999	3	3	1.31357	1.60016	17.0227	16.4687	1.46818	1.46818	133153	90692.4	1.46818	133153	90692.4	1.46818	42460.8	15.3738
2694.1787@0.9169999	3	3	0.519339	1.74388	18.1457	18.7924	-1.56559	1.56559	289998	454018	-1.56559	289998	454018	-1.56559	-164020	-17.3235
258.0732@3.6790006	3	3	0.963465	3.48581	15.8208	15.124	1.62091	1.62091	57880.9	35709	1.62091	57880.9	35709	1.62091	22172	14.4364
2174.0225@5.591	3	3	0.261214	1.65878	18.1009	18.4965	-1.31552	1.31552	281131	369833	-1.31552	281131	369833	-1.31552	-88701.6	-16.4367
2824.9944@0.934	3	3	1.00129	3.19114	16.9943	18.2869	-2.44969	2.44969	130555	319818	-2.44969	130555	319818	-2.44969	-189263	-17.53
880.2124@3.8849998	3	3	0.650092	0.708868	17.8224	18.2179	-1.31544	1.31544	231781	304895	-1.31544	231781	304895	-1.31544	-73113.2	-16.1578
491.1678@1.609	3	3	5.61772	3.84802	15.3719	16.9937	-3.07757	3.07757	42404.7	130503	-3.07757	42404.7	130503	-3.07757	-88098.6	-16.4268
300.0626@5.2690005	3	3	1.48171	1.38871	18.1161	17.1411	1.96555	1.96555	284102	144541	1.96555	284102	144541	1.96555	139561	17.0905
1522.2335@0.9209999	3	3	0.220194	2.43275	16.4777	17.3053	-1.77467	1.77467	91262.6	161961	-1.77467	91262.6	161961	-1.77467	-70698.6	-16.1094
679.1364@3.4500005	3	3	0.683571	1.01821	17.3041	17.8953	-1.50652	1.50652	161824	243792	-1.50652	161824	243792	-1.50652	-81967.8	-16.3228
458.1641@3.7789996	3	3	0.959186	0.635447	17.9058	17.4217	1.39869	1.39869	245573	175573	1.39869	245573	175573	1.39869	69999.9	16.0951
348.0198@16.367998	3	3	3.30362	5.35801	17.1498	18.8024	-3.14398	3.14398	145416	457184	-3.14398	145416	457184	-3.14398	-311768	-18.2501
258.1223@1.734	3	3	1.05326	1.19283	18.1864	18.5848	-1.31806	1.31806	298301	393178	-1.31806	298301	393178	-1.31806	-94877.6	-16.5338
2824.648@0.922	3	3	0.6937	2.94809	17.5068	18.6422	-2.19685	2.19685	186233	409127	-2.19685	186233	409127	-2.19685	-222894	-17.766
218.065@5.1899996	3	3	1.11645	0.948474	18.8215	18.4686	1.27719	1.27719	463286	362737	1.27719	463286	362737	1.27719	100549	16.6175
570.2373@1.285	3	3	1.6576	0.608559	20.6747	19.0891	3.0013	3.0013	1.67376e+06	557678	3.0013	1.67376e+06	557678	3.0013	1.11608e+06	20.09
1528.5232@0.9320001	3	3	0.0372283	1.4888	18.1486	18.5712	-1.34036	1.34036	290579	389482	-1.34036	290579	389482	-1.34036	-98902.2	-16.5937
1242.285@3.1700003	3	3	0.249247	2.12582	17.7142	18.1485	-1.35132	1.35132	215029	290573	-1.35132	215029	290573	-1.35132	-75544.2	-16.205
3163.6409@0.922	3	3	0.34732	2.07382	17.843	18.6183	-1.71151	1.71151	235111	402396	-1.71151	235111	402396	-1.71151	-167284	-17.3519
467.8234@16.528	3	3	0.53758	0.658368	17.856	18.3609	-1.41895	1.41895	237247	336643	-1.41895	237247	336643	-1.41895	-99395.6	-16.6009
291.8613@16.410002	3	3	5.388	1.74974	14.9395	17.1893	-4.7561	4.7561	31421.8	149445	-4.7561	31421.8	149445	-4.7561	-118024	-16.8487
460.2093@8.554	3	3	1.48824	3.18199	18.2204	17.3589	1.81684	1.81684	305406	168097	1.81684	305406	168097	1.81684	137309	17.0671
2824.2412@0.92399985	3	3	1.27896	2.153	17.5193	18.4808	-1.94728	1.94728	187861	365818	-1.94728	187861	365818	-1.94728	-177957	-17.4412
496.0141@16.351	3	3	1.6219	3.82997	18.5688	16.5525	4.04552	4.04552	388844	96117	4.04552	388844	96117	4.04552	292727	18.1592
1527.9196@0.9209999	3	3	0.461416	1.66765	18.1944	18.6879	-1.40781	1.40781	299964	422291	-1.40781	299964	422291	-1.40781	-122328	-16.9004
520.218@3.9939997	3	3	0.696756	0.987801	18.0598	18.3463	-1.21973	1.21973	273230	333266	-1.21973	273230	333266	-1.21973	-60036.4	-15.8735
676.2022@1.6270001	3	3	3.84557	0.616568	17.4256	18.3002	-1.83349	1.83349	176050	322787	-1.83349	176050	322787	-1.83349	-146737	-17.1629
575.2607@5.138	3	3	0.463391	0.776401	17.9444	18.3372	-1.31291	1.31291	252240	331168	-1.31291	252240	331168	-1.31291	-78928.5	-16.2683
1532.7162@0.9169999	3	3	0.670484	1.10654	17.5343	18.068	-1.44762	1.44762	189827	274798	-1.44762	189827	274798	-1.44762	-84970.9	-16.3747
313.1755@4.3429995	3	3	5.32695	1.84051	17.8146	16.7284	2.12318	2.12318	230530	108578	2.12318	230530	108578	2.12318	121953	16.896
1538.3075@0.922	3	3	0.519717	1.93797	18.8353	19.301	-1.38095	1.38095	467734	645920	-1.38095	467734	645920	-1.38095	-178185	-17.443
1109.7216@4.876	3	3	2.98452	3.37699	18.2225	17.071	2.22154	2.22154	305860	137680	2.22154	305860	137680	2.22154	168181	17.3597
257.0993@1.705	3	3	2.6587	1.92254	18.9404	18.1262	1.75838	1.75838	503071	286099	1.75838	503071	286099	1.75838	216972	17.7272
181.9967@16.379	3	3	3.86195	2.45018	18.1812	16.9246	2.38925	2.38925	297216	124397	2.38925	297216	124397	2.38925	172819	17.3989
287.1839@3.6959994	3	3	0.531763	1.21138	16.3628	16.8525	-1.40423	1.40423	84271.9	118337	-1.40423	84271.9	118337	-1.40423	-34064.9	-15.056
552.3026@3.9700003	3	3	2.77321	4.09265	16.7878	17.7424	-1.93797	1.93797	113145	219272	-1.93797	113145	219272	-1.93797	-106127	-16.6954
2694.8982@0.94200003	3	3	0.140572	2.14424	17.8122	18.4211	-1.525	1.525	230155	350986	-1.525	230155	350986	-1.525	-120831	-16.8826
530.1578@1.215	3	3	1.15874	1.28422	19.813	20.3417	-1.44262	1.44262	921090	1.32879e+06	-1.44262	921090	1.32879e+06	-1.44262	-407695	-18.6371
289.0795@1.245	3	3	1.80946	0.883271	18.3065	17.5163	1.72923	1.72923	324187	187475	1.72923	324187	187475	1.72923	136712	17.0608
692.0831@8.719001	3	3	1.51909	0.933274	18.237	17.3554	1.84236	1.84236	308948	167691	1.84236	308948	167691	1.84236	141257	17.108
272.0251@6.477	3	3	0.259507	1.45257	17.475	18.1102	-1.55312	1.55312	182180	282949	-1.55312	182180	282949	-1.55312	-100768	-16.6207
405.8453@16.479002	3	3	0.7451	0.70822	18.0771	18.5987	-1.43552	1.43552	276535	396971	-1.43552	276535	396971	-1.43552	-120436	-16.8779
1606.959@0.927	3	3	0.349746	2.14832	16.9239	18.1589	-2.35383	2.35383	124339	292673	-2.35383	124339	292673	-2.35383	-168334	-17.361
216.0277@1.1049999	3	3	0.339379	1.1818	18.1522	17.4907	1.58178	1.58178	291317	184170	1.58178	291317	184170	1.58178	107147	16.7092
651.2571@3.16	3	3	173.205	7.94289	13.3877	4.45448	488.838	488.838	10717.6	21.9247	488.838	10717.6	21.9247	488.838	10695.7	13.3847
1207.2122@3.1690001	3	3	0.955788	2.05655	14.7407	15.1807	-1.35661	1.35661	27377	37140	-1.35661	27377	37140	-1.35661	-9762.99	-13.2531
1010.1433@1.354	3	3	0.208138	0.287626	18.6176	18.4607	1.11485	1.11485	402200	360767	1.11485	402200	360767	1.11485	41432.8	15.3385
194.021@4.9899993	3	3	2.16062	1.4517	17.5556	16.9761	1.49435	1.49435	192648	128918	1.49435	192648	128918	1.49435	63730.1	15.9597
1289.3466@3.803	3	3	0.279275	1.46787	18.0064	18.3402	-1.26034	1.26034	263309	331859	-1.26034	263309	331859	-1.26034	-68549.4	-16.0649
394.1788@4.471	3	3	1.68346	1.19417	17.6175	18.4704	-1.80606	1.80606	201096	363190	-1.80606	201096	363190	-1.80606	-162095	-17.3065
294.0719@4.0530005	3	3	1.06692	2.85562	18.8109	18.0989	1.63803	1.63803	459879	280752	1.63803	459879	280752	1.63803	179127	17.4506
448.1405@6.959	3	3	1.62685	1.67394	17.9888	17.3748	1.53053	1.53053	260122	169956	1.53053	260122	169956	1.53053	90166.2	16.4603
588.2746@3.5440001	3	3	0.531502	3.71683	16.8237	17.6459	-1.76805	1.76805	115995	205085	-1.76805	115995	205085	-1.76805	-89089.9	-16.443
1428.919@0.922	3	3	0.451491	2.90218	17.4419	18.4227	-1.97356	1.97356	178050	351392	-1.97356	178050	351392	-1.97356	-173342	-17.4033
234.061@4.431	3	3	1.00888	1.02184	18.7251	17.9282	1.73731	1.73731	433322	249421	1.73731	433322	249421	1.73731	183901	17.4886
1068.1738@0.99499995	3	3	0.340853	0.571007	17.5131	17.7432	-1.17291	1.17291	187057	219401	-1.17291	187057	219401	-1.17291	-32343.8	-14.9812
210.0845@5.2070003	3	3	1.36622	1.5427	17.2705	16.3904	1.84044	1.84044	158101	85903.9	1.84044	158101	85903.9	1.84044	72197.1	16.1397
765.341@4.0250006	3	3	1.77709	3.5327	18.2993	19.3374	-2.0536	2.0536	322571	662432	-2.0536	322571	662432	-2.0536	-339861	-18.3746
1624.9988@0.934	3	3	0.458956	3.19332	17.4633	18.3371	-1.83256	1.83256	180703	331149	-1.83256	180703	331149	-1.83256	-150446	-17.1989
676.1345@1.6169999	3	3	5.06186	7.90752	16.003	19.1994	-9.16665	9.16665	65674.5	602015	-9.16665	65674.5	602015	-9.16665	-536341	-19.0328
2824.9585@0.916	3	3	0.932395	2.5874	17.5633	18.7194	-2.22851	2.22851	193677	431611	-2.22851	193677	431611	-2.22851	-237935	-17.8602
2689.9087@0.915	3	3	0.290892	2.09064	18.2092	18.9275	-1.64526	1.64526	303044	498585	-1.64526	303044	498585	-1.64526	-195541	-17.5771
714.1974@1.217	3	3	0.225112	1.014	18.4537	17.9959	1.37345	1.37345	359020	261400	1.37345	359020	261400	1.37345	97619.6	16.5749
326.1546@6.7960005	3	3	173.205	6.34407	16.4827	5.32646	2282.27	2282.27	91578	40.1258	2282.27	91578	40.1258	2282.27	91537.9	16.4821
1588.9644@0.975	3	3	0.532092	0.902381	17.7586	18.129	-1.29268	1.29268	221755	286658	-1.29268	221755	286658	-1.29268	-64903	-15.986
324.1602@7.3970003	3	3	173.205	9.33054	15.8887	5.19792	1652.87	1652.87	60669.2	36.7055	1652.87	60669.2	36.7055	1652.87	60632.5	15.8878
419.1539@4.3160005	3	3	2.72409	2.18633	17.4351	16.2684	2.245	2.245	177216	78938.1	2.245	177216	78938.1	2.245	98277.7	16.5846
350.063@6.187	3	3	1.73068	1.96216	17.3901	16.3449	2.0637	2.0637	171769	83233.5	2.0637	171769	83233.5	2.0637	88535.7	16.434
1339.0975@0.91300005	3	3	0.758136	2.64608	18.0606	19.0084	-1.92893	1.92893	273383	527336	-1.92893	273383	527336	-1.92893	-253954	-17.9542
1613.7476@0.92799985	3	3	0.188299	2.53026	17.9632	18.7612	-1.73871	1.73871	255541	444312	-1.73871	255541	444312	-1.73871	-188771	-17.5263
1482.1158@0.934	3	3	0.527431	1.80498	17.7637	18.2683	-1.41874	1.41874	222532	315716	-1.41874	222532	315716	-1.41874	-93183.5	-16.5078
1650.7362@7.0240016	3	3	0.432378	2.01701	17.4296	18.2085	-1.71584	1.71584	176537	302909	-1.71584	176537	302909	-1.71584	-126372	-16.9473
1150.2598@1.007	3	3	0.490333	1.6382	17.7515	17.2437	1.42188	1.42188	220672	155198	1.42188	220672	155198	1.42188	65474.9	15.9987
296.1482@3.7840002	3	3	2.58551	2.08486	15.7678	16.3694	-1.51738	1.51738	55793.4	84659.6	-1.51738	55793.4	84659.6	-1.51738	-28866.3	-14.8171
482.2647@8.573999	3	3	4.63418	2.39316	15.0517	14.1929	1.81362	1.81362	33964.2	18727.3	1.81362	33964.2	18727.3	1.81362	15237	13.8953
255.0865@3.5230002	3	3	0.747994	0.291163	18.0613	17.7954	1.20239	1.20239	273523	227483	1.20239	273523	227483	1.20239	46040.1	15.4906
254.0574@5.6419997	3	3	0.21708	1.22431	16.6115	17.1592	-1.46173	1.46173	100131	146364	-1.46173	100131	146364	-1.46173	-46233.1	-15.4966
1532.3147@0.9320001	3	3	0.704228	1.46849	18.3226	18.8914	-1.48322	1.48322	327838	486254	-1.48322	327838	486254	-1.48322	-158417	-17.2734
1435.9933@0.92399985	3	3	1.77399	1.59085	15.8208	16.5492	-1.65681	1.65681	57881.4	95898.3	-1.65681	57881.4	95898.3	-1.65681	-38016.9	-15.2144
1439.2999@0.9320001	3	3	0.534975	1.36924	18.4717	18.8752	-1.32272	1.32272	363521	480838	-1.32272	363521	480838	-1.32272	-117317	-16.8401
127.009@4.367	3	3	1.99479	1.5412	14.0033	14.6217	-1.53515	1.53515	16421.8	25209.9	-1.53515	16421.8	25209.9	-1.53515	-8788.1	-13.1013
666.1206@6.4980006	3	3	1.58293	2.67116	18.3812	17.2985	2.11798	2.11798	341430	161205	2.11798	341430	161205	2.11798	180225	17.4594
1524.9242@0.9169999	3	3	0.213384	1.56256	17.9123	18.7021	-1.72895	1.72895	246675	426489	-1.72895	246675	426489	-1.72895	-179814	-17.4561
314.1544@6.1679997	3	3	173.205	3.45258	17.5038	5.5926	3851.39	3851.39	185848	48.2549	3851.39	185848	48.2549	3851.39	185800	17.5034
1383.4235@4.319	3	3	2.27945	2.54316	17.4614	18.2224	-1.69472	1.69472	180466	305840	-1.69472	180466	305840	-1.69472	-125374	-16.9359
308.0861@4.646	3	3	3.51778	1.1315	16.4506	17.2156	-1.69946	1.69946	89559.3	152203	-1.69946	89559.3	152203	-1.69946	-62643.5	-15.9349
548.1547@1.5959998	3	3	2.20122	2.70342	19.0457	18.1021	1.92335	1.92335	541167	281366	1.92335	541167	281366	1.92335	259801	17.987
259.1172@1.727	3	3	3.18522	0.46292	19.6884	18.9259	1.69646	1.69646	844887	498030	1.69646	844887	498030	1.69646	346857	18.404
251.1152@4.7070003	3	3	2.41724	1.1409	17.0591	17.6607	-1.51736	1.51736	136556	207206	-1.51736	136556	207206	-1.51736	-70649.2	-16.1084
3298.2505@0.91800016	3	3	0.357782	2.46587	17.4623	18.2913	-1.77652	1.77652	180581	320806	-1.77652	180581	320806	-1.77652	-140225	-17.0974
3345.689@0.9169999	3	3	0.417404	2.10965	17.6047	18.3575	-1.68499	1.68499	199319	335851	-1.68499	199319	335851	-1.68499	-136532	-17.0589
725.4533@4.798	3	3	0.723774	1.05903	18.3078	17.8576	1.36626	1.36626	324494	237506	1.36626	324494	237506	1.36626	86988.3	16.4085
329.1577@3.944	3	3	1.11868	0.629142	18.4751	18.0392	1.3528	1.3528	364396	269364	1.3528	364396	269364	1.3528	95032.7	16.5361
422.0824@1.035	3	3	1.31138	1.6525	16.9166	17.7554	-1.78848	1.78848	123712	221258	-1.78848	123712	221258	-1.78848	-97545.4	-16.5738
3076.2097@0.9169999	3	3	0.245873	1.25222	18.1521	18.6532	-1.41534	1.41534	291286	412269	-1.41534	291286	412269	-1.41534	-120983	-16.8844
1411.6432@4.529	3	3	0.697999	2.46833	17.4738	18.0796	-1.52182	1.52182	182033	277021	-1.52182	182033	277021	-1.52182	-94987.9	-16.5355
1576.5@5.722	3	3	1.22977	1.07321	21.285	20.6755	1.52572	1.52572	2.5552e+06	1.67475e+06	1.52572	2.5552e+06	1.67475e+06	1.52572	880455	19.7479
1543.7466@5.4150004	3	3	1.64857	1.00258	17.9188	17.3257	1.50854	1.50854	247803	164267	1.50854	247803	164267	1.50854	83536.6	16.3501
326.0401@3.5750005	3	3	0.497658	2.5325	17.7205	16.9692	1.68324	1.68324	215968	128305	1.68324	215968	128305	1.68324	87663.1	16.4197
463.0146@10.513	3	3	1.47117	0.664147	17.9969	17.4887	1.42225	1.42225	261577	183917	1.42225	261577	183917	1.42225	77659.4	16.2449
1436.3081@0.92399985	3	3	0.150018	2.18649	17.8987	18.5659	-1.58802	1.58802	244362	388050	-1.58802	244362	388050	-1.58802	-143688	-17.1326
536.2832@5.249	3	3	1.073	5.03246	16.6183	17.8946	-2.42221	2.42221	100601	243676	-2.42221	100601	243676	-2.42221	-143075	-17.1264
1543.7155@0.926	3	3	1.18993	1.40226	17.3976	17.8132	-1.33381	1.33381	172668	230307	-1.33381	172668	230307	-1.33381	-57638.5	-15.8147
255.0916@3.8440003	3	3	12.1408	6.83358	17.3845	14.9773	5.30452	5.30452	171100	32255.5	5.30452	171100	32255.5	5.30452	138844	17.0831
359.2047@4.126	3	3	1.32119	0.566588	16.8548	17.4627	-1.52397	1.52397	118524	180627	-1.52397	118524	180627	-1.52397	-62103	-15.9224
2623.1646@4.9270005	3	3	1.72468	14.8527	15.0517	18.2529	-9.19758	9.19758	33963.4	312381	-9.19758	33963.4	312381	-9.19758	-278418	-18.0869
229.0597@1.255	3	3	0.808419	0.490669	17.421	17.6519	-1.17354	1.17354	175488	205942	-1.17354	175488	205942	-1.17354	-30453.9	-14.8943
550.275@3.9700003	3	3	2.77963	4.09227	16.7875	17.7411	-1.93664	1.93664	113122	219076	-1.93664	113122	219076	-1.93664	-105954	-16.6931
678.356@5.1090007	3	3	1.52565	5.78099	16.2574	17.4095	-2.22246	2.22246	78334.5	174095	-2.22246	78334.5	174095	-2.22246	-95760.7	-16.5471
1525.1276@0.92399985	3	3	0.25371	2.12009	17.5916	18.348	-1.68924	1.68924	197516	333652	-1.68924	197516	333652	-1.68924	-136136	-17.0547
1479.122@0.923	3	3	0.539066	2.12677	17.6644	18.4174	-1.68529	1.68529	207732	350088	-1.68528	207732	350088	-1.68528	-142356	-17.1191
255.0738@3.4480002	3	3	4.19097	1.51564	16.8857	16.0498	1.785	1.785	121086	67835.5	1.785	121086	67835.5	1.785	53250.7	15.7005
1460.4523@1.6169999	3	3	0.745113	0.504757	16.9928	16.7263	1.20286	1.20286	130421	108426	1.20286	130421	108426	1.20286	21994.8	14.4249
3345.7124@0.9169999	3	3	0.45477	2.05479	17.6091	18.3588	-1.68148	1.68148	199921	336162	-1.68148	199921	336162	-1.68148	-136241	-17.0558
1532.5175@0.922	3	3	0.551469	0.878994	17.6511	18.003	-1.27626	1.27626	205830	262692	-1.27626	205830	262692	-1.27626	-56862.3	-15.7952
295.0898@1.1239998	3	3	6.54916	0.484239	15.4907	16.9061	-2.66727	2.66727	46044	122812	-2.66727	46044	122812	-2.66727	-76767.8	-16.2282
341.1946@4.6149993	3	3	0.9315	1.62937	16.6452	17.2144	-1.4837	1.4837	102494	152070	-1.4837	102494	152070	-1.4837	-49576.1	-15.5974
126.0135@1.1359999	3	3	1.72836	1.98647	14.5805	15.0981	-1.43152	1.43152	24500.9	35073.3	-1.43152	24500.9	35073.3	-1.43152	-10572.5	-13.368
594.163@1.5959998	3	3	1.48031	1.01658	18.7124	17.9693	1.67377	1.67377	429531	256626	1.67377	429531	256626	1.67377	172906	17.3996
138.0316@5.7169995	3	3	1.42674	0.750115	17.3331	17.8154	-1.39707	1.39707	165108	230667	-1.39707	165108	230667	-1.39707	-65558.8	-16.0005
498.0298@16.358	3	3	5.4392	2.90105	17.8705	16.607	2.4007	2.4007	239632	99817.2	2.40071	239632	99817.2	2.40071	139814	17.0932
1435.3213@1.0060002	3	3	0.278545	1.42985	17.1062	17.5133	-1.32605	1.32605	141081	187080	-1.32605	141081	187080	-1.32605	-45998.8	-15.4893
526.0922@1.5790001	3	3	0.767209	1.83784	19.4427	18.8197	1.54005	1.54005	712595	462710	1.54005	712595	462710	1.54005	249884	17.9309
416.1158@1.495	3	3	2.19015	1.30676	18.0546	18.7406	-1.6088	1.6088	272254	438004	-1.6088	272254	438004	-1.6088	-165749	-17.3386
678.0668@7.451001	3	3	2.10533	2.55588	17.5909	16.2251	2.57725	2.57725	197422	76601.8	2.57725	197422	76601.8	2.57725	120820	16.8825
1614.1472@0.9169999	3	3	0.728765	2.8232	17.1447	18.048	-1.87035	1.87035	144903	271020	-1.87035	144903	271020	-1.87035	-126117	-16.9444
275.1119@1.6270001	3	3	2.46437	3.45906	16.2514	17.1629	-1.88091	1.88091	78012.5	146735	-1.88091	78012.5	146735	-1.88091	-68722.3	-16.0685
1533.0956@0.92399985	3	3	0.421709	1.7105	17.8926	18.5359	-1.56188	1.56188	243341	380070	-1.56188	243341	380070	-1.56188	-136729	-17.061
200.0797@2.3880002	3	3	1.29321	1.15973	17.001	17.3762	-1.29701	1.29701	131164	170122	-1.29701	131164	170122	-1.29701	-38957.5	-15.2496
976.3669@7.195	3	3	1.844	2.34575	17.2097	18.3667	-2.23001	2.23001	151573	338010	-2.23001	151573	338010	-2.23001	-186436	-17.5083
429.0347@10.514	3	3	1.99507	0.888532	17.8107	17.2997	1.42511	1.42511	229916	161332	1.42511	229916	161332	1.42511	68583.6	16.0656
260.1155@5.4049993	3	3	0.11981	1.86635	17.2873	17.7501	-1.37827	1.37827	159951	220456	-1.37827	159951	220456	-1.37827	-60505.2	-15.8848
299.1476@3.34	3	3	0.578697	0.177771	17.2972	17.5369	-1.18078	1.18078	161057	190172	-1.18078	161057	190172	-1.18078	-29115.6	-14.8295
465.0116@10.511001	3	3	1.60208	1.00232	18.0952	17.6651	1.34734	1.34734	280031	207840	1.34734	280031	207840	1.34734	72191.6	16.1395
653.1705@1.238	3	3	0.352957	0.217474	18.4971	18.3122	1.13677	1.13677	369988	325473	1.13677	369988	325473	1.13677	44514.9	15.442
1457.3378@0.926	3	3	0.864159	1.27891	17.4877	18.2518	-1.69837	1.69837	183786	312136	-1.69837	183786	312136	-1.69837	-128350	-16.9697
168.0421@3.9729998	3	3	2.00528	0.743101	17.7466	17.0903	1.57597	1.57597	219914	139542	1.57597	219914	139542	1.57597	80372.2	16.2944
308.1576@1.1020001	3	3	0.451587	2.57955	14.4854	15.6355	-2.21929	2.21929	22937.1	50904.1	-2.21929	22937.1	50904.1	-2.21929	-27967	-14.7714
365.132@5.4550004	3	3	2.07494	0.454153	16.619	16.2131	1.32491	1.32491	100653	75969.5	1.32491	100653	75969.5	1.32491	24683	14.5912
1529.4946@3.9850004	3	3	0.978317	1.75738	17.4423	18.4051	-1.94907	1.94907	178094	347119	-1.94907	178094	347119	-1.94907	-169024	-17.3669
733.3115@3.577	3	3	4.4814	1.46635	17.3545	16.4435	1.88046	1.88046	167586	89119.8	1.88046	167586	89119.8	1.88046	78466.6	16.2598
1605.6866@0.9209999	3	3	0.432289	2.41964	18.2606	19.2428	-1.97549	1.97549	314033	620368	-1.97549	314033	620368	-1.97549	-306335	-18.2248
1414.7039@5.6009994	3	3	0.930554	0.799463	17.9802	17.5589	1.3392	1.3392	258579	193085	1.3392	258579	193085	1.3392	65494.2	15.9991
208.0129@16.367998	3	3	10.4534	7.37161	16.3032	13.9182	5.22338	5.22338	80863.1	15481	5.22338	80863.1	15481	5.22338	65382.1	15.9966
299.1471@4.208	3	3	0.358321	0.28646	17.691	17.4134	1.21224	1.21224	211608	174560	1.21224	211608	174560	1.21224	37048.3	15.1771
3266.6445@0.923	3	3	0.842399	1.48701	17.9069	18.4676	-1.47503	1.47503	245763	362507	-1.47503	245763	362507	-1.47503	-116744	-16.833
256.0734@4.862	3	3	1.75392	2.65221	17.0694	16.3535	1.64256	1.64256	137532	83730.2	1.64256	137532	83730.2	1.64256	53802	15.7154
1303.46@4.5180006	3	3	0.135446	1.29591	18.009	18.8264	-1.76214	1.76214	263790	464834	-1.76214	263790	464834	-1.76214	-201044	-17.6172
1457.6747@0.9169999	3	3	0.649151	1.93193	17.604	18.3133	-1.63498	1.63498	199221	325723	-1.63498	199221	325723	-1.63498	-126502	-16.9488
210.841@16.445002	3	3	0.187639	0.303658	17.67	17.87	-1.14874	1.14874	208538	239556	-1.14874	208538	239556	-1.14874	-31018	-14.9208
327.1787@4.2620006	3	3	1.24015	0.354386	19.8438	19.3786	1.38057	1.38057	940992	681598	1.38057	940992	681598	1.38057	259394	17.9848
1616.7448@0.926	3	3	0.211947	1.83503	18.3785	18.9708	-1.5076	1.5076	340796	513784	-1.5076	340796	513784	-1.5076	-172988	-17.4003
416.2262@4.229	3	3	3.57619	4.41111	16.3344	17.4861	-2.22172	2.22172	82631.4	183584	-2.22172	82631.4	183584	-2.22172	-100953	-16.6233
3297.8477@0.91199994	3	3	0.0885594	2.59961	17.4116	18.4	-1.98388	1.98388	174350	345890	-1.98388	174350	345890	-1.98388	-171540	-17.3882
276.0953@1.2320001	3	3	0.242644	0.651215	17.18	17.5932	-1.3317	1.3317	148487	197740	-1.3317	148487	197740	-1.3317	-49252.7	-15.5879
1617.5416@0.922	3	3	0.611052	1.4398	18.0806	18.6203	-1.4537	1.4537	277203	402970	-1.4537	277203	402970	-1.4537	-125767	-16.9404
622.3279@4.5719995	3	3	2.29196	2.29565	17.1108	18.3708	-2.39495	2.39495	141531	338959	-2.39495	141531	338959	-2.39495	-197428	-17.591
582.3981@4.5	3	3	2.13985	2.27589	17.3744	16.4776	1.86194	1.86194	169914	91256.3	1.86194	169914	91256.3	1.86194	78657.7	16.2633
1524.7256@0.922	3	3	0.798064	2.96846	17.4273	18.3163	-1.85189	1.85189	176253	326401	-1.85189	176253	326401	-1.85189	-150148	-17.196
181.8694@16.496	3	3	0.189934	0.875749	17.6842	18.0014	-1.24589	1.24589	210607	262394	-1.2459	210607	262394	-1.2459	-51787.1	-15.6603
338.882@16.498	3	3	0.255628	1.01247	17.4298	17.8492	-1.33746	1.33746	176555	236134	-1.33746	176555	236134	-1.33746	-59579.3	-15.8625
1525.328@0.92799985	3	3	0.303315	2.92901	17.5104	18.3125	-1.74358	1.74358	186708	325540	-1.74358	186708	325540	-1.74358	-138832	-17.083
422.1894@3.202	3	3	4.30171	0.312052	19.4072	18.4137	1.99111	1.99111	695279	349191	1.99111	695279	349191	1.99111	346088	18.4008
444.2546@11.874	3	3	1.38853	1.9804	18.5011	19.0313	-1.44412	1.44412	371022	535799	-1.44412	371022	535799	-1.44412	-164777	-17.3302
560.2435@1.2340001	3	3	0.646171	1.06211	17.9372	18.3815	-1.36064	1.36064	250981	341494	-1.36064	250981	341494	-1.36064	-90513.4	-16.4658
1694.3606@0.915	3	3	0.523348	3.37507	17.2139	18.3182	-2.14987	2.14987	152025	326834	-2.14987	152025	326834	-2.14987	-174809	-17.4154
3297.799@0.93000007	3	3	0.29352	2.69146	17.3988	18.372	-1.96308	1.96308	172812	339243	-1.96308	172812	339243	-1.96308	-166431	-17.3446
494.2478@3.8969996	3	3	1.55799	3.09411	17.614	18.3228	-1.63451	1.63451	200601	327885	-1.63451	200601	327885	-1.63451	-127284	-16.9577
1353.298@0.92799985	3	3	0.410949	1.74468	18.1177	18.7182	-1.51629	1.51629	284419	431263	-1.51629	284419	431263	-1.51629	-146844	-17.1639
261.1993@4.006	3	3	3.26034	1.91698	19.3539	18.3523	2.00216	2.00216	670023	334651	2.00216	670023	334651	2.00216	335372	18.3554
725.4001@4.8009996	3	3	0.654023	0.362981	17.9632	17.5682	1.31494	1.31494	255546	194341	1.31494	255546	194341	1.31494	61205.9	15.9014
470.134@3.5890005	3	3	1.94633	1.44671	16.7704	17.4883	-1.64483	1.64483	111786	183869	-1.64483	111786	183869	-1.64483	-72083.1	-16.1374
278.1409@3.9980001	3	3	0.630019	0.493856	19.2248	19.4655	-1.18159	1.18159	612675	723931	-1.18159	612675	723931	-1.18159	-111256	-16.7635
179.8625@16.475002	3	3	0.694796	0.818708	17.3614	17.6487	-1.22033	1.22033	168382	205483	-1.22033	168382	205483	-1.22033	-37100.5	-15.1792
2708.218@0.923	3	3	0.955828	1.77973	17.5525	18.2106	-1.57799	1.57799	192233	303342	-1.57799	192233	303342	-1.57799	-111109	-16.7616
1632.7273@0.919	3	3	0.225635	1.54062	17.7872	18.3721	-1.49997	1.49997	226189	339278	-1.49997	226189	339278	-1.49997	-113089	-16.7871
274.1523@3.715	3	3	0.960268	1.31161	17.0882	16.4004	1.61076	1.61076	139331	86500.2	1.61076	139331	86500.2	1.61076	52830.7	15.6891
1339.6982@0.922	3	3	0.433215	1.56919	17.1499	17.9039	-1.68642	1.68642	145428	245253	-1.68642	145428	245253	-1.68642	-99825.1	-16.6071
1532.1166@0.9209999	3	3	0.376437	1.67138	18.0373	18.5667	-1.44338	1.44338	269002	388271	-1.44338	269002	388271	-1.44338	-119269	-16.8639
286.1262@1.705	3	3	0.799147	0.762577	18.2123	18.5281	-1.24473	1.24473	303697	378021	-1.24473	303697	378021	-1.24473	-74323.7	-16.1815
2842.6118@0.922	3	3	0.619327	1.12497	17.1623	17.8894	-1.65535	1.65535	146680	242807	-1.65535	146680	242807	-1.65535	-96127.1	-16.5527
838.4189@4.8839993	3	3	0.705491	0.935219	18.0663	17.7332	1.25973	1.25973	274480	217889	1.25973	274480	217889	1.25973	56591.8	15.7883
1627.877@0.9320001	3	3	0.527448	2.34683	17.5634	18.2271	-1.58422	1.58422	193685	306840	-1.58422	193685	306840	-1.58422	-113155	-16.7879
274.0518@4.464	3	3	0.793133	1.82254	18.8437	17.8153	2.03966	2.03966	470442	230647	2.03966	470442	230647	2.03966	239794	17.8714
714.3705@5.2890005	3	3	1.08368	1.54097	17.4593	18.0683	-1.5252	1.5252	180205	274849	-1.5252	180205	274849	-1.5252	-94644	-16.5302
392.0731@4.346	3	3	1.85646	1.07036	17.2468	16.7662	1.39527	1.39527	155522	111464	1.39527	155522	111464	1.39527	44057.9	15.4271
2837.598@0.9169999	3	3	0.97565	2.21073	17.1506	18.0517	-1.86756	1.86756	145493	271717	-1.86756	145493	271717	-1.86756	-126224	-16.9456
1492.5059@0.9099999	3	3	0.6021	1.40068	17.6932	18.1715	-1.39307	1.39307	211927	295228	-1.39307	211927	295228	-1.39307	-83301.2	-16.3461
382.0871@4.402	3	3	0.741596	1.61961	17.3002	17.7991	-1.41322	1.41322	161386	228074	-1.41322	161386	228074	-1.41322	-66687.7	-16.0251
368.1863@7.14	3	3	173.205	3.44945	15.2358	4.94528	1252.43	1252.43	38586.1	30.8091	1252.43	38586.1	30.8091	1252.43	38555.3	15.2346
194.0573@5.0120006	3	3	0.358309	0.642395	17.2399	17.5943	-1.27837	1.27837	154790	197878	-1.27837	154790	197878	-1.27837	-43088.7	-15.395
1525.5298@0.922	3	3	0.583205	2.10088	17.6313	18.4221	-1.73005	1.73005	203018	351233	-1.73005	203018	351233	-1.73005	-148214	-17.1773
2710.5789@0.923	3	3	0.400865	1.34156	17.9313	18.2986	-1.28994	1.28994	249958	322430	-1.28994	249958	322430	-1.28994	-72472.7	-16.1452
1552.491@5.589	3	3	1.02164	0.58748	17.977	17.6818	1.22703	1.22703	257998	210263	1.22703	257998	210263	1.22703	47735.8	15.5428
1632.0964@0.92399985	3	3	1.17283	1.95355	17.6449	18.2989	-1.57352	1.57352	204947	322489	-1.57352	204947	322489	-1.57352	-117542	-16.8428
1131.6406@4.8730006	3	3	1.55075	1.25884	17.9919	17.4088	1.49808	1.49808	260680	174010	1.49808	260680	174010	1.49808	86670.5	16.4033
430.9588@2.8180006	3	3	0.189662	0.134196	18.2646	18.0966	1.12349	1.12349	314917	280301	1.12349	314917	280301	1.12349	34615.7	15.0791
1578.9269@0.94200003	3	3	0.297484	1.90865	17.4333	17.9784	-1.45921	1.45921	176983	258255	-1.45921	176983	258255	-1.45921	-81272.6	-16.3105
651.7299@4.522	3	3	1.69467	2.59881	17.2022	17.966	-1.6979	1.6979	150793	256031	-1.6979	150793	256031	-1.6979	-105238	-16.6833
1350.081@0.92399985	3	3	0.469725	0.969688	17.6047	17.9881	-1.30438	1.30438	199321	259991	-1.30438	199321	259991	-1.30438	-60670	-15.8887
159.0893@3.9189997	3	3	173.205	5.01005	16.7651	5.50279	2456.32	2456.32	111376	45.3426	2456.32	111376	45.3426	2456.32	111331	16.7645
1621.3375@0.9209999	3	3	0.25098	1.75467	17.6554	18.3164	-1.5812	1.5812	206446	326432	-1.5812	206446	326432	-1.5812	-119986	-16.8725
1624.7303@0.926	3	3	0.609756	2.31922	17.614	18.2849	-1.59202	1.59202	200609	319373	-1.59202	200609	319373	-1.59202	-118764	-16.8577
364.0613@7.7620006	3	3	1.21985	2.0236	17.3256	16.0708	2.38621	2.38621	164254	68834.6	2.38621	164254	68834.6	2.38621	95419	16.542
584.1353@1.0299999	3	3	0.19411	1.5668	16.8466	17.4142	-1.48211	1.48211	117849	174666	-1.48211	117849	174666	-1.48211	-56816.7	-15.794
1621.5327@0.92399985	3	3	0.547957	1.51421	17.9234	18.5492	-1.54313	1.54313	248587	383601	-1.54313	248587	383601	-1.54313	-135014	-17.0428
1446.8914@0.9169999	3	3	0.618552	1.20963	17.6618	17.9905	-1.2559	1.2559	207363	260427	-1.2559	207363	260427	-1.2559	-53064.2	-15.6955
1500.716@5.167	3	3	1.51045	6.5848	16.0335	17.846	-3.51249	3.51249	67074.8	235600	-3.51249	67074.8	235600	-3.51249	-168525	-17.3626
606.2002@1.2419999	3	3	0.621168	0.64955	19.1292	18.8337	1.22731	1.22731	573413	467211	1.22731	573413	467211	1.22731	106202	16.6964
454.2417@4.4430003	3	3	19.3136	0.402621	20.4786	16.8634	12.2539	12.2539	1.46109e+06	119235	12.2539	1.46109e+06	119235	12.2539	1.34185e+06	20.3558
258.1573@4.083	3	3	1.17344	0.353388	16.7742	17.0354	-1.19852	1.19852	112080	134330	-1.19852	112080	134330	-1.19852	-22249.9	-14.4415
347.1198@3.9500005	3	3	173.205	6.29892	17.9123	6.14953	3475	3475	246687	70.9892	3475	246687	70.9892	3475	246616	17.9119
1226.3176@3.1690001	3	3	0.317855	2.3796	17.1412	17.7043	-1.47741	1.47741	144548	213557	-1.47741	144548	213557	-1.47741	-69008.7	-16.0745
1631.5974@4.124	3	3	1.17537	4.93144	17.0334	18.3991	-2.57705	2.57705	134140	345686	-2.57705	134140	345686	-2.57705	-211546	-17.6906
1158.3287@1.6070002	3	3	0.197854	0.212682	17.2159	17.0045	1.15784	1.15784	152231	131479	1.15784	152231	131479	1.15784	20752.3	14.341
734.7654@1.6169999	3	3	0.658244	0.255774	19.0363	18.0258	2.01455	2.01455	537647	266883	2.01455	537647	266883	2.01455	270765	18.0467
404.2042@5.973	3	3		7.98062	14.6389	0	25512.6	25512.6	25512.6	1	25512.6	25512.6	1	25512.6	25511.6	14.6389
450.114@1.1990001	3	3	0.199668	1.69887	17.0793	17.5959	-1.43058	1.43058	138483	198111	-1.43058	138483	198111	-1.43058	-59628	-15.8637
1138.4186@7.418999	3	3	1.1311	3.33988	19.3731	20.7563	-2.6085	2.6085	679001	1.77118e+06	-2.6085	679001	1.77118e+06	-2.6085	-1092176	-20.0588
560.2428@3.525	3	3	0.402337	1.25229	19.7677	19.2983	1.38451	1.38451	892630	644724	1.38451	892630	644724	1.38451	247905	17.9194
568.2837@4.049	3	3	4.26837	8.34627	16.5672	19.7362	-8.99441	8.99441	97101.5	873371	-8.99441	97101.5	873371	-8.99441	-776269	-19.5662
500.0065@16.346003	3	3	4.43404	3.99446	17.6835	16.3952	2.44243	2.44243	210507	86187.9	2.44243	210507	86187.9	2.44243	124320	16.9237
554.3007@3.972	3	3	3.09109	4.17555	15.67	16.5981	-1.90276	1.90276	52134.7	99200	-1.90276	52134.7	99200	-1.90276	-47065.3	-15.5224
370.2018@7.043999	3	3	173.205	7.05063	13.8979	4.39278	726.634	726.634	15264.3	21.0068	726.634	15264.3	21.0068	726.634	15243.3	13.8959
2546.2026@0.908	3	3	0.619832	0.917636	17.2652	17.5501	-1.21836	1.21836	157522	191920	-1.21836	157522	191920	-1.21836	-34397.1	-15.07
1521.7325@0.9099999	3	3	0.895262	1.99472	17.0955	17.8084	-1.63918	1.63918	140039	229550	-1.63918	140039	229550	-1.63918	-89510.6	-16.4498
1353.2909@0.922	3	3	0.604224	1.80547	17.5684	18.2758	-1.63285	1.63285	194364	317368	-1.63285	194364	317368	-1.63285	-123003	-16.9083
723.1899@1.5	3	3	2.92137	0.640594	18.7415	17.9965	1.67595	1.67595	438288	261516	1.67595	438288	261516	1.67595	176772	17.4315
1445.461@7.1149983	3	3	0.544014	1.28873	17.7151	18.2412	-1.44	1.44	215170	309846	-1.44	215170	309846	-1.44	-94675.7	-16.5307
1436.5123@0.93299997	3	3	0.227389	2.29263	17.3124	18.0503	-1.66774	1.66774	162765	271450	-1.66774	162765	271450	-1.66774	-108685	-16.7298
594.2402@1.6299999	3	3	1.99152	0.422065	18.6085	19.2942	-1.6084	1.6084	399696	642872	-1.6084	399696	642872	-1.6084	-243176	-17.8916
614.0825@1.307	3	3	0.107918	1.55238	18.1226	18.5818	-1.37486	1.37486	285386	392364	-1.37486	285386	392364	-1.37486	-106978	-16.707
628.0848@8.511001	3	3	1.09197	3.63956	17.129	15.316	3.51363	3.51363	143330	40792.6	3.51363	143330	40792.6	3.51363	102538	16.6458
2546.5317@0.9169999	3	3	0.299116	1.33998	17.6137	17.9645	-1.27526	1.27526	200564	255772	-1.27526	200564	255772	-1.27526	-55207.5	-15.7526
3263.107@0.92399985	3	3	0.514754	1.72071	17.376	18.1125	-1.66611	1.66611	170094	283396	-1.66611	170094	283396	-1.66611	-113302	-16.7898
1522.333@0.91300005	3	3	0.754632	2.10158	17.4552	18.1208	-1.58617	1.58617	179702	285038	-1.58617	179702	285038	-1.58617	-105336	-16.6846
642.1792@1.236	3	3	0.904975	1.218	18.0869	18.4226	-1.26206	1.26206	278413	351372	-1.26206	278413	351372	-1.26206	-72959.6	-16.1548
2380.1946@0.915	3	3	0.813465	2.10024	16.6596	17.7611	-2.14567	2.14567	103526	222134	-2.14567	103526	222134	-2.14567	-118607	-16.8558
660.1104@8.322	3	3	2.55921	4.41473	17.1327	14.9482	4.54579	4.54579	143699	31611.5	4.54579	143699	31611.5	4.54579	112088	16.7743
404.0257@16.379	3	3	8.23802	3.17642	17.2188	19.3565	-4.40052	4.40052	152539	671253	-4.40052	152539	671253	-4.40052	-518713	-18.9846
565.2697@2.5709999	3	3	86.9462		0	10.7919	-1772.91	1772.91	1	1772.91	-1772.91	1	1772.91	-1772.91	-1771.91	-10.7911
335.0998@4.541	3	3	1.44225	1.5882	17.3111	15.605	3.26264	3.26264	162613	49840.9	3.26264	162613	49840.9	3.26264	112772	16.783
170.1048@4.0579996	3	3	4.17549	0.861554	15.9477	17.5652	-3.0684	3.0684	63203.5	193934	-3.0684	63203.5	193934	-3.0684	-130730	-16.9962
242.1001@1.1140001	3	3	0.803738	0.416738	16.8936	16.3679	1.43958	1.43958	121750	84573.5	1.43958	121750	84573.5	1.43958	37176.8	15.1821
528.1788@1.6400001	3	3	1.13438	1.00778	16.34	16.9322	-1.50752	1.50752	82952	125052	-1.50752	82952	125052	-1.50752	-42099.9	-15.3615
735.2797@3.803	3	3	1.50542	2.14138	17.3406	18.1386	-1.73867	1.73867	165973	288573	-1.73867	165973	288573	-1.73867	-122600	-16.9036
699.3134@3.049	3	3	0.369312	0.618466	16.2866	16.8169	-1.44425	1.44425	79937.3	115450	-1.44425	79937.3	115450	-1.44425	-35512.5	-15.116
661.3261@4.743	3	3	3.13107	5.38957	15.4748	16.6685	-2.28747	2.28747	45538.1	104167	-2.28747	45538.1	104167	-2.28747	-58629	-15.8393
2702.5625@0.923	3	3	0.0885178	1.63233	17.279	17.9303	-1.57055	1.57055	159040	249781	-1.57055	159040	249781	-1.57055	-90740.9	-16.4695
1605.5245@1.7029998	3	3	1.05844	1.1797	15.4557	15.7928	-1.26319	1.26319	44939.7	56767.2	-1.26319	44939.7	56767.2	-1.26319	-11827.5	-13.5299
505.1855@4.2099996	3	3	2.84868	14.1655	14.775	17.3456	-5.9404	5.9404	28037	166551	-5.9404	28037	166551	-5.9404	-138514	-17.0797
178.0048@6.251	3	3	0.5312	0.335868	17.5554	17.3799	1.12941	1.12941	192626	170554	1.12941	192626	170554	1.12941	22071.7	14.4299
635.2993@3.9850004	3	3	0.938877	0.660979	18.109	17.429	1.60217	1.60217	282720	176460	1.60217	282720	176460	1.60217	106260	16.6972
128.0644@5.1780005	3	3	1.46519	0.903987	17.5748	16.9454	1.54694	1.54694	195230	126204	1.54694	195230	126204	1.54694	69025.8	16.0748
229.1058@1.8059999	3	3	0.249369	0.635382	17.38	17.6779	-1.22933	1.22933	170572	209689	-1.22933	170572	209689	-1.22933	-39116.5	-15.2555
1308.6501@0.92399985	3	3	1.10909	1.85263	17.4648	18.1291	-1.58487	1.58487	180893	286692	-1.58487	180893	286692	-1.58487	-105799	-16.691
471.1956@3.2319999	3	3	1.64548	1.07661	17.1107	16.6661	1.36095	1.36095	141529	103993	1.36095	141529	103993	1.36095	37535.8	15.196
998.3491@7.7419996	3	3	1.04677	2.30519	16.9443	17.8066	-1.818	1.818	126106	229261	-1.818	126106	229261	-1.818	-103155	-16.6545
1516.9855@0.915	3	3	0.771841	3.28364	18.1104	19.2174	-2.15389	2.15389	282998	609546	-2.15389	282998	609546	-2.15389	-326548	-18.3169
694.0982@8.735	3	3	0.543349	1.1721	17.6459	17.1491	1.41111	1.41111	205094	145342	1.41111	205094	145342	1.41111	59752	15.8667
654.3567@4.5180006	3	3	0.699445	0.384424	17.8045	18.2657	-1.37672	1.37672	228924	315165	-1.37672	228924	315165	-1.37672	-86240.8	-16.3961
398.2531@4.161	3	3	4.64979	1.045	17.315	16.4126	1.86923	1.86923	163058	87232.6	1.86923	163058	87232.6	1.86923	75825.1	16.2104
1543.1111@0.922	3	3	0.504428	1.39806	17.468	18.0158	-1.4619	1.4619	181295	265036	-1.4619	181295	265036	-1.4619	-83740.8	-16.3536
1491.4427@3.6409998	3	3	0.543061	4.1502	16.7273	17.7579	-2.04278	2.04278	108500	221642	-2.04278	108500	221642	-2.04278	-113142	-16.7878
2380.5303@0.9209999	3	3	1.02697	1.88831	16.7765	17.6527	-1.83552	1.83552	112259	206053	-1.83552	112259	206053	-1.83552	-93794.1	-16.5172
502.1901@4.284	3	3	3.58343	4.93103	16.4526	15.3154	2.19951	2.19951	89688.2	40776.4	2.19951	89688.2	40776.4	2.19951	48911.8	15.5779
608.0332@16.339998	3	3	3.2544	2.55423	18.0385	19.0903	-2.07301	2.07301	269242	558142	-2.07301	269242	558142	-2.07301	-288900	-18.1402
382.0928@3.3090003	3	3	2.99185	1.79801	17.015	17.9265	-1.88101	1.88101	132445	249130	-1.88101	132445	249130	-1.88101	-116685	-16.8323
1152.3785@1.7019998	3	3	2.05431	0.921382	17.8372	18.4988	-1.58187	1.58187	234165	370417	-1.58187	234165	370417	-1.58187	-136252	-17.0559
318.1059@2.9260004	3	3	6.75285	5.11177	16.6486	18.7284	-4.22756	4.22756	102738	434330	-4.22756	102738	434330	-4.22756	-331593	-18.3391
1613.9456@0.91300005	3	3	0.433711	2.58083	17.2201	18.1758	-1.93953	1.93953	152677	296121	-1.93953	152677	296121	-1.93953	-143445	-17.1301
554.2687@3.7799997	3	3	3.78237	3.75099	16.7313	17.924	-2.2859	2.2859	108797	248699	-2.2859	108797	248699	-2.2859	-139902	-17.0941
274.1522@3.5979998	3	3	3.23149	1.48262	16.7667	15.9537	1.75691	1.75691	111504	63466	1.75691	111504	63466	1.75691	48037.9	15.5519
1339.8992@0.9320001	3	3	0.803532	2.60879	16.5859	17.4552	-1.82675	1.82675	98370.1	179698	-1.82675	98370.1	179698	-1.82675	-81327.8	-16.3115
282.1309@4.2830005	3	3	0.422572	0.253562	17.8885	17.6108	1.21229	1.21229	242655	200162	1.21229	242655	200162	1.21229	42492.8	15.3749
326.1548@6.7960005	3	3	173.205	4.50093	16.1483	5.32602	1810.63	1810.63	72631	40.1136	1810.63	72631	40.1136	1810.63	72590.9	16.1475
2545.8643@0.91199994	3	3	0.873601	1.05435	17.4347	17.803	-1.29084	1.29084	177156	228680	-1.29084	177156	228680	-1.29084	-51524	-15.653
580.7679@4.6910005	3	3	3.47331	5.68908	14.821	16.424	-3.03757	3.03757	28945.2	87922.8	-3.03757	28945.2	87922.8	-3.03757	-58977.7	-15.8479
359.1235@1.714	3	3	0.308839	1.04263	18.5502	18.2263	1.25173	1.25173	383849	306655	1.25173	383849	306655	1.25173	77193.7	16.2362
1435.7084@0.93299997	3	3	0.174216	1.56739	17.3863	18.0795	-1.61676	1.61676	171321	276986	-1.61676	171321	276986	-1.61676	-105665	-16.6891
2842.5935@0.922	3	3	0.156721	1.82233	17.5237	18.1023	-1.49348	1.49348	188429	281416	-1.49348	188429	281416	-1.49348	-92986.2	-16.5047
1347.6871@0.922	3	3	0.142393	1.18851	17.9556	18.4978	-1.45618	1.45618	254203	370166	-1.45618	254203	370166	-1.45618	-115963	-16.8233
536.7258@3.5880003	3	3	2.11409	2.73108	15.1361	16.455	-2.49473	2.49473	36009.7	89834.7	-2.49473	36009.7	89834.7	-2.49473	-53824.9	-15.716
143.0942@5.2249994	3	3	4.27039	7.03199	14.2707	15.9739	-3.25625	3.25625	19765.1	64360.1	-3.25625	19765.1	64360.1	-3.25625	-44595	-15.4446
1621.9023@0.915	3	3	0.340363	1.91337	17.4549	18.1005	-1.56441	1.56441	179661	281064	-1.56441	179661	281064	-1.56441	-101403	-16.6297
1521.5331@0.9169999	3	3	0.369976	2.29829	17.2073	17.7982	-1.50618	1.50618	151327	227926	-1.50618	151327	227926	-1.50618	-76599.4	-16.225
472.136@5.4500003	3	3	2.48561	1.75545	16.5563	15.5864	1.95878	1.95878	96371.3	49199.8	1.95878	96371.3	49199.8	1.95878	47171.6	15.5256
1009.705@4.8839993	3	3	1.39477	0.554046	16.577	16.2012	1.29757	1.29757	97766.1	75345.4	1.29757	97766.1	75345.4	1.29757	22420.8	14.4525
1621.7388@0.92799985	3	3	0.721882	1.78231	17.4811	18.103	-1.53898	1.53898	182946	281550	-1.53898	182946	281550	-1.53898	-98603.8	-16.5894
1188.8083@4.9679995	3	3	0.934636	1.90013	17.8627	17.4309	1.34886	1.34886	238339	176697	1.34886	238339	176697	1.34886	61641.7	15.9116
303.1795@3.6699996	3	3	3.82666	5.95558	15.2173	14.0624	2.22681	2.22681	38095.8	17107.8	2.22681	38095.8	17107.8	2.22681	20988	14.3573
207.9799@16.705997	3	3	2.19113	3.50177	18.2501	16.9972	2.38332	2.38332	311775	130816	2.38332	311775	130816	2.38332	180959	17.4653
683.4275@4.667	3	3	1.1915	0.321875	17.4813	17.2087	1.208	1.208	182974	151468	1.208	182974	151468	1.208	31505	14.9433
1199.378@4.201	3	3	1.77721	0.705424	16.2257	16.6716	-1.36211	1.36211	76635.5	104386	-1.36211	76635.5	104386	-1.36211	-27750.9	-14.7602
470.2029@3.5869994	3	3	0.714046	1.85697	16.6986	18.0132	-2.48728	2.48728	106360	264548	-2.48728	106360	264548	-2.48728	-158188	-17.2713
572.3044@3.7369998	3	3	0.59989	1.58815	17.7534	18.2394	-1.40053	1.40053	220953	309451	-1.40053	220953	309451	-1.40053	-88498.4	-16.4334
247.0696@3.577	3	3	0.709399	0.45112	17.0668	17.2646	-1.14694	1.14694	137284	157457	-1.14694	137284	157457	-1.14694	-20173.1	-14.3001
163.0631@4.4959993	3	3	0.204028	0.349057	17.1615	17.3868	-1.16902	1.16902	146603	171381	-1.16902	146603	171381	-1.16902	-24778.8	-14.5968
996.2772@1.255	3	3	0.447981	1.13135	17.3089	17.0395	1.20528	1.20528	162366	134712	1.20528	162366	134712	1.20528	27653.6	14.7552
588.326@5.8559995	3	3	0.456967	0.392293	17.4822	17.6775	-1.14497	1.14497	183092	209635	-1.14497	183092	209635	-1.14497	-26543.5	-14.6961
323.1321@4.285	3	3	0.854199	2.2707	17.0234	17.5017	-1.39304	1.39304	133218	185578	-1.39304	133218	185578	-1.39304	-52359.8	-15.6762
3222.0862@0.91300005	3	3	0.267237	2.31134	17.1236	17.8946	-1.70654	1.70654	142791	243680	-1.70654	142791	243680	-1.70654	-100889	-16.6224
1484.5311@5.556	3	3	0.0566724	0.944247	18.3616	17.8898	1.38686	1.38686	336812	242860	1.38686	336812	242860	1.38686	93952.4	16.5196
562.1729@1.2419999	3	3	0.556075	0.424373	18.6852	18.2291	1.37184	1.37184	421506	307256	1.37184	421506	307256	1.37184	114250	16.8018
480.2157@4.5950003	3	3	3.11268	7.27135	15.9535	17.4172	-2.75818	2.75818	63456.6	175025	-2.75818	63456.6	175025	-2.75818	-111568	-16.7676
1695.774@0.92799985	3	3	0.570232	2.70593	16.7138	17.9322	-2.32697	2.32697	107483	250110	-2.32697	107483	250110	-2.32697	-142627	-17.1219
1449.2894@0.9320001	3	3	0.551742	1.26577	18.0665	18.3818	-1.24429	1.24429	274514	341576	-1.24429	274514	341576	-1.24429	-67061.9	-16.0332
1614.3501@0.926	3	3	0.875853	2.2884	17.1356	18.0861	-1.93252	1.93252	143993	278269	-1.93252	143993	278269	-1.93252	-134276	-17.0348
1693.552@4.042	3	3	1.17919	4.52081	16.7105	17.9161	-2.30623	2.30623	107244	247329	-2.30623	107244	247329	-2.30623	-140085	-17.0959
943.5992@4.7880006	3	3	0.556188	1.75521	17.4375	16.9169	1.43453	1.43453	177506	123738	1.43453	177506	123738	1.43453	53767.8	15.7145
1578.3225@0.9169999	3	3	0.450385	1.61509	18.1205	18.679	-1.47278	1.47278	284971	419700	-1.47278	284971	419700	-1.47278	-134729	-17.0397
1614.5514@0.92399985	3	3	0.623817	1.91707	17.1742	17.9585	-1.72221	1.72221	147895	254706	-1.72221	147895	254706	-1.72221	-106811	-16.7047
354.0623@3.555	3	3	0.167698	0.514701	19.6965	19.4264	1.20596	1.20596	849673	704559	1.20596	849673	704559	1.20596	145114	17.1468
292.0602@1.224	3	3	1.83134	1.90888	17.63	17.0689	1.47543	1.47543	202842	137480	1.47543	202842	137480	1.47543	65361.9	15.9962
329.0594@3.94	3	3	0.202979	0.702452	17.2363	17.5017	-1.20201	1.20201	154399	185589	-1.20201	154399	185589	-1.20201	-31189.5	-14.9288
314.2454@7.4410014	3	3	1.32685	0.941472	17.712	17.24	1.38702	1.38702	214702	154793	1.38702	214702	154793	1.38702	59908.4	15.8705
1248.8265@4.959	3	3	1.71432	0.470327	18.4425	17.9645	1.39283	1.39283	356238	255766	1.39283	356238	255766	1.39283	100472	16.6164
618.1596@1.5550002	3	3	3.46828	17.5189	12.8199	15.9197	-8.57274	8.57274	7230.65	61986.5	-8.57274	7230.65	61986.5	-8.57274	-54755.8	-15.7407
197.1444@6.298	3	3	0.551186	0.219992	17.7453	18.0276	-1.21617	1.21617	219713	267209	-1.21617	219713	267209	-1.21617	-47496	-15.5355
252.0629@3.4039996	3	3	2.91243	0.540376	17.5057	16.2176	2.44204	2.44204	186099	76206.5	2.44204	186099	76206.5	2.44204	109893	16.7457
195.0529@4.1559997	3	3	1.68373	1.46925	16.858	16.2391	1.53569	1.53569	118786	77350.8	1.53569	118786	77350.8	1.53569	41435.7	15.3386
364.1466@1.2209998	3	3	0.588829	0.746119	17.1231	17.3375	-1.16021	1.16021	142750	165620	-1.16021	142750	165620	-1.16021	-22869.8	-14.4812
1621.935@0.92799985	3	3	0.169788	2.03377	17.5166	18.2028	-1.60903	1.60903	187514	301716	-1.60903	187514	301716	-1.60903	-114202	-16.8012
1049.7406@4.904	3	3	4.32172	0.592963	18.6585	17.7585	1.86614	1.86614	413783	221732	1.86614	413783	221732	1.86614	192051	17.5511
568.2526@4.597	3	3	2.16344	2.1596	17.7552	18.4382	-1.60546	1.60546	221238	355189	-1.60546	221238	355189	-1.60546	-133951	-17.0313
315.1769@4.1959996	3	3	0.358693	1.2715	16.9724	17.5187	-1.46026	1.46026	128592	187777	-1.46026	128592	187777	-1.46026	-59185.2	-15.8529
1134.6298@16.438997	3	3	21.0306		0	15.2928	-40142.5	40142.5	1	40142.5	-40142.5	1	40142.5	-40142.5	-40141.5	-15.2928
825.1016@6.9959993	3	3	0.951475	1.40191	17.0322	17.5464	-1.42818	1.42818	134032	191423	-1.42818	134032	191423	-1.42818	-57390.4	-15.8085
226.9047@16.496998	3	3	1.99955	4.90753	18.4669	17.0685	2.63604	2.63604	362311	137445	2.63604	362311	137445	2.63604	224866	17.7787
646.0952@7.408	3	3	1.10634	5.41349	17.105	14.2693	7.13871	7.13871	140968	19747	7.13871	140968	19747	7.13871	121221	16.8873
782.2317@1.6169999	3	3	1.46234	0.3607	17.5204	17.1998	1.2489	1.2489	188010	150540	1.2489	188010	150540	1.2489	37469.2	15.1934
288.1924@5.508	3	3	2.03289	4.91316	16.4603	18.0048	-2.91691	2.91691	90168.4	263013	-2.91691	90168.4	263013	-2.91691	-172845	-17.3991
2874.2373@0.922	3	3	0.34183	1.20859	17.2428	17.9543	-1.63761	1.63761	155090	253978	-1.63761	155090	253978	-1.63761	-98887.2	-16.5935
232.9385@16.412998	3	3	0.799882	2.51058	17.1233	16.5524	1.48538	1.48538	142763	96112.4	1.48538	142763	96112.4	1.48538	46651	15.5096
270.0521@6.272	3	3	0.604578	2.71591	15.1844	15.836	-1.57089	1.57089	37236.3	58494.2	-1.57089	37236.3	58494.2	-1.57089	-21257.9	-14.3757
274.0555@4.465	3	3	0.48481	1.94212	18.8663	17.8539	2.01725	2.01725	477879	236896	2.01725	477879	236896	2.01725	240983	17.8786
1635.9294@0.94700015	3	3	0.293837	1.49764	17.815	18.2513	-1.3532	1.3532	230591	312034	-1.3532	230591	312034	-1.3532	-81443.7	-16.3135
2541.543@0.923	3	3	0.732268	2.41623	16.9594	17.7719	-1.7563	1.7563	127433	223810	-1.7563	127433	223810	-1.7563	-96377.7	-16.5564
329.1118@1.7520001	3	3	173.205	6.70793	14.5678	4.64052	973.682	973.682	24285.8	24.9423	973.683	24285.8	24.9423	973.683	24260.9	14.5663
939.4521@4.604	3	3	0.943505	0.219027	17.7086	18.0616	-1.27725	1.27725	214200	273588	-1.27725	214200	273588	-1.27725	-59388	-15.8579
168.169@3.854	3	3	0.428181	1.0272	17.1325	16.6729	1.37514	1.37514	143678	104483	1.37514	143678	104483	1.37514	39195.4	15.2584
932.3579@3.0050004	3	3	2.13845	0.75581	17.1501	16.1513	1.99843	1.99843	145448	72781.4	1.99843	145448	72781.4	1.99843	72666.9	16.149
1346.8875@0.91300005	3	3	0.12592	2.14273	17.5877	18.1092	-1.43542	1.43542	196983	282753	-1.43542	196983	282753	-1.43542	-85770.6	-16.3882
230.1265@3.3899996	3	3	1.5609	5.15313	18.341	19.4778	-2.199	2.199	332038	730153	-2.199	332038	730153	-2.199	-398114	-18.6028
348.1262@1.212	3	3	0.283791	2.10331	18.5554	19.0716	-1.43025	1.43025	385231	550975	-1.43025	385231	550975	-1.43025	-165744	-17.3386
2704.243@0.9209999	3	3	1.09817	1.47327	17.4088	18.2232	-1.75853	1.75853	174014	306009	-1.75853	174014	306009	-1.75853	-131995	-17.0101
233.126@3.9619994	3	3	0.31172	1.36761	17.7486	17.209	1.45355	1.45355	220224	151508	1.45355	220224	151508	1.45355	68716	16.0684
2853.6414@0.92399985	3	3	1.10831	2.9825	16.6109	17.5065	-1.86035	1.86035	100089	186200	-1.86035	100089	186200	-1.86035	-86111.5	-16.3939
1454.9019@0.922	3	3	0.749845	1.84487	17.6834	18.2675	-1.4991	1.4991	210497	315557	-1.4991	210497	315557	-1.4991	-105060	-16.6809
1443.2991@0.9320001	3	3	0.384547	1.43983	17.3342	17.8497	-1.42948	1.42948	165240	236208	-1.42948	165240	236208	-1.42948	-70968	-16.1149
1597.5198@4.214	3	3	0.604171	1.05936	17.8049	18.2006	-1.31565	1.31565	228982	301259	-1.31565	228982	301259	-1.31565	-72277.5	-16.1413
453.2198@4.4010005	3	3	3.71636	9.38864	15.3588	17.236	-3.6737	3.6737	42020.7	154371	-3.6737	42020.7	154371	-3.6737	-112351	-16.7776
1634.3296@0.949	3	3	0.121573	1.64826	18.01	18.4836	-1.38856	1.38856	263962	366526	-1.38856	263962	366526	-1.38856	-102564	-16.6462
287.1475@3.3040006	3	3	3.48038	1.54132	17.0664	16.2271	1.78917	1.78917	137246	76709.2	1.78917	137246	76709.2	1.78917	60536.8	15.8855
1743.8009@5.513	3	3	0.944283	3.60169	16.3636	17.2617	-1.86357	1.86357	84320.2	157136	-1.86357	84320.2	157136	-1.86357	-72816	-16.152
1122.3018@3.0739996	3	3	1.85934	5.78221	16.1517	17.6396	-2.80498	2.80498	72800.4	204204	-2.80498	72800.4	204204	-2.80498	-131403	-17.0036
1551.6237@3.375	3	3	0.443702	3.20418	17.1495	16.422	1.65579	1.65579	145381	87801.7	1.65579	145381	87801.7	1.65579	57579.1	15.8133
443.2364@3.593	3	3	8.37961	4.32465	17.8115	15.9603	3.60817	3.60817	230043	63756.2	3.60817	230043	63756.2	3.60817	166287	17.3433
598.2588@3.444	3	3	0.609126	1.00741	17.0251	17.28	-1.19322	1.19322	133375	159146	-1.19322	133375	159146	-1.19322	-25771	-14.6535
435.8781@16.449001	3	3	0.836001	0.460751	17.0544	17.509	-1.37048	1.37048	136105	186529	-1.37048	136105	186529	-1.37048	-50423.7	-15.6218
3084.656@0.926	3	3	0.217308	1.61689	17.9235	18.5129	-1.50462	1.50462	248614	374069	-1.50462	248614	374069	-1.50462	-125455	-16.9368
2558.2527@0.92399985	3	3	0.184952	3.10601	17.238	17.8994	-1.58167	1.58167	154575	244488	-1.58167	154575	244488	-1.58167	-89912.7	-16.4562
1449.8926@0.926	3	3	0.347087	0.937376	17.4791	17.7101	-1.17361	1.17361	182698	214416	-1.17361	182698	214416	-1.17361	-31718.7	-14.953
1581.3236@0.9320001	3	3	0.410154	1.48221	17.9474	18.3305	-1.30416	1.30416	252750	329627	-1.30416	252750	329627	-1.30416	-76877	-16.2303
528.1784@1.243	3	3	1.46399	3.32189	17.4603	18.1684	-1.63365	1.63365	180334	294602	-1.63365	180334	294602	-1.63365	-114269	-16.8021
1616.8148@0.9209999	3	3	0.122904	1.62	18.3362	19.0152	-1.60105	1.60105	330942	529854	-1.60105	330942	529854	-1.60105	-198912	-17.6018
1610.9506@0.9169999	3	3	0.667256	2.53818	16.7312	17.6668	-1.91281	1.91281	108788	208090	-1.91281	108788	208090	-1.91281	-99302.4	-16.5995
950.3818@3.437	3	3	2.35121	2.27489	16.5404	15.8922	1.56716	1.56716	95313.2	60819.2	1.56716	95313.2	60819.2	1.56716	34494	15.0741
334.1405@1.222	3	3	0.990667	0.353217	17.3555	17.0942	1.19858	1.19858	167695	139912	1.19858	167695	139912	1.19858	27783.4	14.7619
204.0932@3.921	3	3	3.97	2.99768	16.7973	18.2955	-2.82475	2.82475	113894	321722	-2.82475	113894	321722	-2.82475	-207828	-17.665
2720.5767@0.923	3	3	0.712588	1.58684	17.549	18.3033	-1.6868	1.6868	191770	323479	-1.6868	191770	323479	-1.6868	-131708	-17.007
380.0559@6.710999	3	3	0.377702	0.703112	17.3837	15.9515	2.6985	2.6985	171006	63370.7	2.6985	171006	63370.7	2.6985	107635	16.7158
301.1987@4.0260005	3	3	0.29817	0.200525	17.375	17.167	1.15506	1.15506	169976	147157	1.15506	169976	147157	1.15506	22818.6	14.4779
356.0473@4.992	3	3	1.79103	2.14702	16.5678	15.9941	1.48839	1.48839	97144.4	65268.1	1.48839	97144.4	65268.1	1.48839	31876.3	14.9602
1354.4773@0.92399985	3	3	0.573785	0.81864	17.942	18.4301	-1.40253	1.40253	251822	353189	-1.40253	251822	353189	-1.40253	-101367	-16.6292
899.1715@6.7680006	3	3	5.0612	2.9801	15.7873	16.9064	-2.17221	2.17221	56550.7	122840	-2.17221	56550.7	122840	-2.17221	-66289.2	-16.0165
475.1909@2.997	3	3	1.52378	173.205	5.16124	16.1017	-1965.17	1965.17	35.7839	70321.4	-1965.17	35.7839	70321.4	-1965.17	-70285.7	-16.1009
3294.0815@1.6169999	3	3		1.73906	14.4137	0	21825.1	21825.1	21825.1	1	21825.1	21825.1	1	21825.1	21824.1	14.4136
1551.7273@0.9320001	3	3	0.165914	1.67935	17.887	18.339	-1.36799	1.36799	242389	331585	-1.36799	242389	331585	-1.36799	-89196.4	-16.4447
167.9259@16.453999	3	3	0.271721	0.829151	17.595	18.0457	-1.36665	1.36665	197986	270578	-1.36665	197986	270578	-1.36665	-72591.3	-16.1475
2866.6194@0.91300005	3	3	1.53105	2.46113	17.228	18.4004	-2.2539	2.2539	153512	345999	-2.2539	153512	345999	-2.2539	-192487	-17.5544
428.3134@13.113999	3	3	0.773004	1.66043	17.4034	17.0041	1.31887	1.31887	173362	131448	1.31887	173362	131448	1.31887	41914.2	15.3552
2879.002@0.922	3	3	0.502713	1.19049	17.0557	17.4264	-1.29303	1.29303	136231	176150	-1.29303	136231	176150	-1.29303	-39919.4	-15.2848
324.1062@3.0219996	3	3	2.21699	4.37298	16.6422	17.676	-2.04732	2.04732	102284	209409	-2.04732	102284	209409	-2.04732	-107125	-16.7089
1186.6305@5.5779996	3	3	2.67881	3.82514	15.8259	17.0332	-2.309	2.309	58087.3	134123	-2.309	58087.3	134123	-2.309	-76036.1	-16.2144
2716.5518@0.9099999	3	3	0.559081	1.64269	17.2502	17.8802	-1.5475	1.5475	155897	241250	-1.5475	155897	241250	-1.5475	-85353.2	-16.3812
460.0529@1.3970002	3	3	0.470415	0.380993	17.8618	17.6579	1.1518	1.1518	238194	206802	1.1518	238194	206802	1.1518	31391.8	14.9381
739.2939@4.1430006	3	3	1.12334	0.454464	16.9534	17.4926	-1.45313	1.45313	126905	184410	-1.45313	126905	184410	-1.45313	-57504.7	-15.8114
285.1329@3.8720002	3	3	0.779583	0.770994	19.0881	18.4492	1.5571	1.5571	557297	357907	1.5571	557297	357907	1.5571	199390	17.6052
3364.6904@0.922	3	3	0.0109854	1.85205	17.5156	18.185	-1.59052	1.59052	187373	298019	-1.59052	187373	298019	-1.59052	-110646	-16.7556
636.3826@4.8069997	3	3	2.15816	4.7722	15.9158	17.3029	-2.61538	2.61538	61822	161688	-2.61538	61822	161688	-2.61538	-99866.3	-16.6077
432.956@2.8080003	3	3	0.381876	0.0482955	17.6732	17.5098	1.11992	1.11992	209004	186623	1.11992	209004	186623	1.11992	22380.6	14.45
373.2199@4.619	3	3	1.33447	1.68217	16.581	17.1609	-1.49468	1.49468	98037.6	146535	-1.49468	98037.6	146535	-1.49468	-48497.5	-15.5656
2842.2546@0.9209999	3	3	0.197955	1.79815	17.4702	18.1897	-1.64666	1.64666	181568	298982	-1.64666	181568	298982	-1.64666	-117413	-16.8412
407.19@1.215	3	3	1.17914	0.619357	17.1749	17.4785	-1.23422	1.23422	147962	182618	-1.23422	147962	182618	-1.23422	-34655.9	-15.0808
113.9804@1.0179999	3	3	2.46508	3.62135	14.9001	14.1431	1.68996	1.68996	30576	18092.7	1.68996	30576	18092.7	1.68996	12483.3	13.6077
281.9914@16.367998	3	3	86.6404	9.15325	16.6092	8.1096	361.947	361.947	99971.6	276.205	361.947	99971.6	276.205	361.947	99695.4	16.6052
189.0637@3.0260003	3	3	1.19822	0.795413	17.2416	17.5707	-1.25625	1.25625	154962	194670	-1.25625	154962	194670	-1.25625	-39708.5	-15.2772
1455.0885@0.927	3	3	0.712431	1.52808	17.3202	17.8534	-1.44714	1.44714	163646	236819	-1.44714	163646	236819	-1.44714	-73173.3	-16.159
430.2042@4.1969995	3	3	4.89358	4.17297	17.7408	19.6651	-3.79533	3.79533	219039	831325	-3.79533	219039	831325	-3.79533	-612286	-19.2238
1635.9419@0.9320001	3	3	0.261441	1.53598	17.6617	18.0872	-1.34304	1.34304	207345	278472	-1.34304	207345	278472	-1.34304	-71127.3	-16.1181
1595.5146@5.459	3	3	1.66205	1.55726	19.1169	18.574	1.45686	1.45686	568538	390248	1.45686	568538	390248	1.45686	178290	17.4439
752.1@8.435999	3	3	6.45165	3.20821	15.8192	14.3177	2.83141	2.83141	57817	20419.9	2.83141	57817	20419.9	2.83141	37397.2	15.1906
909.2968@1.2209998	3	3	0.570488	1.95341	17.0653	16.6225	1.35926	1.35926	137141	100893	1.35926	137141	100893	1.35926	36247.3	15.1456
638.2721@4.5089993	3	3	0.869971	1.11748	17.1783	17.4999	-1.24976	1.24976	148313	185356	-1.24976	148313	185356	-1.24976	-37042.3	-15.1769
311.8656@16.445002	3	3	0.546102	0.86149	18.5116	18.804	-1.22462	1.22462	373725	457670	-1.22462	373725	457670	-1.22462	-83945.3	-16.3572
132.0423@3.5779994	3	3	3.86712	0.654009	18.5391	17.7678	1.70685	1.70685	380918	223170	1.70685	380918	223170	1.70685	157748	17.2673
373.1119@1.243	3	3	0.738618	1.59151	16.6896	16.0931	1.51195	1.51195	105695	69906.7	1.51195	105695	69906.7	1.51195	35788.8	15.1272
1188.8036@4.9679995	3	3	0.83503	0.657244	18.0869	17.4214	1.58603	1.58603	278411	175540	1.58603	278411	175540	1.58603	102871	16.6505
2683.272@0.9169999	3	3	0.805136	5.3602	16.4644	17.5107	-2.06526	2.06526	90420.7	186742	-2.06526	90420.7	186742	-2.06526	-96321.6	-16.5556
1622.139@0.92799985	3	3	0.504173	1.60116	17.3128	17.9264	-1.53011	1.53011	162803	249107	-1.53011	162803	249107	-1.53011	-86304	-16.3971
216.0779@5.173	3	3	0.845747	0.782796	17.1454	16.5637	1.49661	1.49661	144965	96862.7	1.49661	144965	96862.7	1.49661	48102.7	15.5538
2103.0574@4.841	3	3	0.332882	1.62175	16.596	17.2219	-1.54318	1.54318	99056.8	152862	-1.54318	99056.8	152862	-1.54318	-53805.2	-15.7155
1543.2985@0.9320001	3	3	0.22672	1.35261	18.0907	18.5103	-1.33759	1.33759	279156	373396	-1.33759	279156	373396	-1.33759	-94240.6	-16.5241
993.5401@4.799	3	3	0.639042	4.96928	18.7878	17.1816	3.04456	3.04456	452582	148653	3.04456	452582	148653	3.04456	303929	18.2134
146.094@4.979	3	3	0.725994	0.224965	16.4799	16.9157	-1.35263	1.35263	91399.4	123629	-1.35263	91399.4	123629	-1.35263	-32229.7	-14.9761
1540.7194@0.923	3	3	0.37514	0.998149	17.6229	18.0468	-1.34162	1.34162	201840	270794	-1.34162	201840	270794	-1.34162	-68953.6	-16.0733
1449.0991@0.92399985	3	3	0.26117	1.17261	17.9612	18.3492	-1.30863	1.30863	255183	333939	-1.30863	255183	333939	-1.30863	-78756.2	-16.2651
569.184@4.167	3	3	0.498321	0.92557	17.3063	17.6165	-1.23985	1.23985	162073	200947	-1.23985	162073	200947	-1.23985	-38873.9	-15.2465
418.217@3.7490003	3	3	0.673638	2.47713	17.1124	17.6583	-1.45998	1.45998	141687	206861	-1.45998	141687	206861	-1.45998	-65173.9	-15.992
2902.642@0.922	3	3	0.828139	1.41612	17.434	18.0598	-1.54313	1.54313	177072	273245	-1.54313	177072	273245	-1.54313	-96172.9	-16.5533
1624.5293@0.9320001	3	3	0.614623	0.996729	17.343	17.9529	-1.52619	1.52619	166248	253727	-1.52619	166248	253727	-1.52619	-87478.7	-16.4166
232.0701@5.23	3	3	0.548839	0.762603	17.2406	16.9102	1.25737	1.25737	154863	123164	1.25737	154863	123164	1.25737	31698.8	14.9521
354.1155@1.2110001	3	3	0.0614059	4.83629	17.3747	18.3578	-1.97669	1.97669	169946	335931	-1.97669	169946	335931	-1.97669	-165985	-17.3407
704.026@16.367998	3	3	2.15408	1.37325	17.869	17.1638	1.63037	1.63037	239392	146833	1.63037	239392	146833	1.63037	92558.7	16.4981
2379.8599@0.91300005	3	3	1.06867	3.16149	16.6406	17.5614	-1.89316	1.89316	102169	193422	-1.89316	102169	193422	-1.89316	-91253	-16.4776
1118.4447@4.0639997	3	3	1.89168	1.43446	16.7601	17.3865	-1.54363	1.54363	110996	171336	-1.54363	110996	171336	-1.54363	-60340.2	-15.8808
333.152@1.2110001	3	3	0.862758	1.13475	14.2886	14.5922	-1.23426	1.23426	20011.9	24699.9	-1.23426	20011.9	24699.9	-1.23426	-4688	-12.1948
432.1908@8.012	3	3	0.889129	1.9036	17.0098	16.5486	1.37666	1.37666	131962	95856.6	1.37666	131962	95856.6	1.37666	36105.2	15.1399
2526.0964@4.722	3	3	1.93835	2.31592	16.8767	17.6401	-1.69738	1.69738	120339	204261	-1.69738	120339	204261	-1.69738	-83921.6	-16.3568
976.6771@4.8139997	3	3	1.49777	0.280912	17.628	16.6041	2.03338	2.03338	202555	99614.8	2.03338	202555	99614.8	2.03338	102940	16.6514
2724.573@0.922	3	3	1.84493	1.77987	17.3997	18.0538	-1.57356	1.57356	172920	272101	-1.57356	172920	272101	-1.57356	-99180.8	-16.5978
272.0253@16.347	3	3	2.55961	2.16545	17.0203	17.7937	-1.70927	1.70927	132932	227218	-1.70927	132932	227218	-1.70927	-94285	-16.5247
1102.7286@4.765	3	3	2.50291	0.567706	19.5551	18.9498	1.52134	1.52134	770318	506342	1.52134	770318	506342	1.52134	263976	18.01
333.0775@5.0530005	3	3	0.425488	0.151722	16.7845	17.2002	-1.33395	1.33395	112887	150586	-1.33395	112887	150586	-1.33395	-37698.6	-15.2022
1446.4906@0.934	3	3	0.728411	1.31154	17.6432	17.9708	-1.25499	1.25499	204704	256900	-1.25499	204704	256900	-1.25499	-52196.6	-15.6717
830.5139@4.722	3	3	1.07587	1.20809	16.8994	16.4698	1.34689	1.34689	122246	90761.3	1.34689	122246	90761.3	1.34689	31484.4	14.9423
345.1538@4.2459993	3	3	1.79195	1.31408	16.8505	16.419	1.34866	1.34866	118172	87621.4	1.34866	118172	87621.4	1.34866	30550.5	14.8989
281.0527@5.1899996	3	3	0.647688	1.13123	16.7898	16.3986	1.31146	1.31146	113297	86390.2	1.31146	113297	86390.2	1.31146	26906.7	14.7157
388.1732@4.2399993	3	3	2.32011	1.32298	18.2934	17.1199	2.25559	2.25559	321254	142426	2.25559	321254	142426	2.25559	178828	17.4482
2025.9551@5.938	3	3	3.08143	2.44611	17.8528	16.8569	1.99421	1.99421	236709	118698	1.99421	236709	118698	1.99421	118011	16.8486
314.132@5.0950003	3	3	0.878017	0.541889	16.9828	16.7181	1.2014	1.2014	129518	107806	1.2014	129518	107806	1.2014	21712.2	14.4062
341.1468@5.599999	3	3	1.39511	0.443448	17.294	16.7167	1.49204	1.49204	160698	107703	1.49204	160698	107703	1.49204	52994.2	15.6935
2916.0166@0.9209999	3	3	0.434204	2.81838	16.44	17.334	-1.85823	1.85823	88908.4	165212	-1.85823	88908.4	165212	-1.85823	-76303.8	-16.2195
1621.3306@0.926	3	3	0.642559	2.03648	17.7559	18.3423	-1.50147	1.50147	221336	332331	-1.50147	221336	332331	-1.50147	-110995	-16.7601
581.808@16.438997	3	3	0.611222	1.14464	16.9464	17.409	-1.37802	1.37802	126296	174038	-1.37802	126296	174038	-1.37802	-47741.9	-15.543
961.4726@4.8349996	3	3	1.99861	4.62597	15.202	16.9722	-3.41113	3.41113	37692.7	128575	-3.41113	37692.7	128575	-3.41113	-90882.2	-16.4717
508.1794@3.694	3	3	0.598082	4.51582	15.5821	16.7576	-2.25862	2.25862	49055.3	110798	-2.25862	49055.3	110798	-2.25862	-61742.2	-15.914
352.1916@7.942001	3	3	173.205	4.59297	14.8247	4.75518	1074.58	1074.58	29019.6	27.0055	1074.58	29019.6	27.0055	1074.58	28992.6	14.8234
475.234@5.0429997	3	3	0.63831	0.139347	17.6018	18.2201	-1.53506	1.53506	198920	305356	-1.53506	198920	305356	-1.53506	-106435	-16.6996
470.3747@3.5880003	3	3	2.59801	1.47404	16.7605	17.4583	-1.62201	1.62201	111025	180084	-1.62201	111025	180084	-1.62201	-69058.5	-16.0755
1546.6304@0.92399985	3	3	1.11549	0.70418	17.1245	17.6177	-1.40756	1.40756	142888	201123	-1.40756	142888	201123	-1.40756	-58235	-15.8296
1430.4417@0.91300005	3	3	0.135282	1.06118	17.4166	17.9606	-1.45803	1.45803	174948	255080	-1.45803	174948	255080	-1.45803	-80131.9	-16.2901
1216.329@1.255	3	3	1.44651	1.10206	17.8045	18.2508	-1.36263	1.36263	228916	311927	-1.36263	228916	311927	-1.36263	-83011.3	-16.341
3114.6846@0.9309998	3	3	0.29793	2.7216	17.1003	18.112	-2.01627	2.01627	140505	283297	-2.01627	140505	283297	-2.01627	-142791	-17.1235
718.7479@7.4619985	3	3	0.313688	0.774957	18.7698	19.5333	-1.69761	1.69761	446957	758760	-1.69761	446957	758760	-1.69761	-311803	-18.2503
619.3299@4.444	3	3	0.936122	1.41973	17.3123	17.6826	-1.29262	1.29262	162753	210379	-1.29262	162753	210379	-1.29262	-47625.5	-15.5394
1632.7021@0.92399985	3	3	0.118768	2.15152	18.0309	18.824	-1.73279	1.73279	267827	464089	-1.73279	267827	464089	-1.73279	-196262	-17.5824
462.0702@1.446	3	3	1.6833	4.604	19.2765	18.0274	2.37684	2.37684	635025	267172	2.37684	635025	267172	2.37684	367852	18.4888
174.0678@5.181	3	3	1.3448	0.762414	17.5038	16.8169	1.60981	1.60981	185853	115450	1.60981	185853	115450	1.60981	70402.9	16.1033
666.1209@6.4980006	3	3	1.53326	2.3158	18.4506	17.2947	2.22824	2.22824	358247	160776	2.22824	358247	160776	2.22824	197471	17.5913
549.1201@3.7579997:1	3	3	1.65171	0.531927	16.2568	16.6198	-1.28605	1.28605	78305.7	100705	-1.28605	78305.7	100705	-1.28605	-22399.5	-14.4512
1901.2448@4.8790007	3	3	1.42015	2.53911	16.8768	16.0462	1.77839	1.77839	120341	67668.7	1.77839	120341	67668.7	1.77839	52672.4	15.6848
1535.5211@0.9429999	3	3	0.301497	0.943814	17.7316	18.0987	-1.2897	1.2897	217646	280698	-1.2897	217646	280698	-1.2897	-63051.7	-15.9442
895.7647@3.8909998	3	3	1.47264	2.65662	16.0764	17.6112	-2.89763	2.89763	69098.1	200221	-2.89763	69098.1	200221	-2.89763	-131122	-17.0006
598.1836@1.6169999	3	3	1.36408	0.9471	17.5575	16.9196	1.55608	1.55608	192906	123969	1.55608	192906	123969	1.55608	68936.7	16.073
2881.633@0.9169999	3	3	0.435017	2.18975	16.737	17.8322	-2.13651	2.13651	109227	233364	-2.13651	109227	233364	-2.13651	-124137	-16.9216
584.0956@11.851999	3	3	2.29996	2.02067	17.1907	15.1329	4.16337	4.16337	149591	35930.2	4.16337	149591	35930.2	4.16337	113660	16.7944
721.3359@3.9119997	3	3	3.46978	3.16802	16.212	17.3679	-2.22817	2.22817	75910.5	169141	-2.22817	75910.5	169141	-2.22817	-93230.7	-16.5085
320.1211@1.222	3	3	1.0485	0.566362	17.7586	18.0934	-1.26123	1.26123	221751	279679	-1.26123	221751	279679	-1.26123	-57927.7	-15.822
2862.595@0.92799985	3	3	0.843298	1.25655	17.3778	18.0183	-1.55888	1.55888	170310	265492	-1.55888	170310	265492	-1.55888	-95182.5	-16.5384
1625.1396@0.922	3	3	0.394571	1.58676	17.7629	18.4047	-1.56021	1.56021	222423	347027	-1.56021	222423	347027	-1.56021	-124604	-16.927
632.4784@0.92799985	3	3	0.531175	2.18355	16.9921	18.1431	-2.22069	2.22069	130357	289483	-2.22069	130357	289483	-2.22069	-159126	-17.2798
483.1151@3.9760003	3	3	1.96032	1.00909	17.5143	16.8812	1.55085	1.55085	187211	120715	1.55085	187211	120715	1.55085	66496.1	16.021
714.0349@16.341997	3	3	7.75923	2.73944	16.519	18.4673	-3.8591	3.8591	93913	362420	-3.8591	93913	362420	-3.8591	-268507	-18.0346
3033.8706@0.9209999	3	3	1.05614	3.23915	16.751	17.728	-1.96826	1.96826	110298	217095	-1.96826	110298	217095	-1.96826	-106797	-16.7045
470.2364@5.867	3	3	0.727315	3.37241	17.2027	16.0054	2.29303	2.29303	150842	65782.9	2.29303	150842	65782.9	2.29303	85059.5	16.3762
1122.3699@1.618	3	3	1.75947	1.47451	16.224	16.8289	-1.52089	1.52089	76543.6	116414	-1.52089	76543.6	116414	-1.52089	-39870.5	-15.283
598.7572@3.8709998	3	3	0.505615	1.37002	15.9868	16.6988	-1.63802	1.63802	64940.3	106374	-1.63802	64940.3	106374	-1.63802	-41433.5	-15.3385
1409.464@6.7050014	3	3	0.228323	1.61425	17.2607	17.6674	-1.3257	1.3257	157030	208175	-1.3257	157030	208175	-1.3257	-51145.2	-15.6423
3124.6543@0.9320001	3	3	0.733173	1.60852	16.635	17.3508	-1.64238	1.64238	101776	167155	-1.64238	101776	167155	-1.64238	-65379.1	-15.9965
1730.3973@4.3779993	3	3	0.94464	2.5098	16.7286	15.582	2.21388	2.21388	108597	49052.8	2.21388	108597	49052.8	2.21388	59544.2	15.8617
553.1686@1.2439998	3	3	0.593947	0.458289	17.8316	17.4598	1.29391	1.29391	233260	180275	1.29391	233260	180275	1.29391	52984.8	15.6933
1514.6508@5.583	3	3	1.20808	1.39852	17.2326	16.7842	1.36449	1.36449	153999	112862	1.36449	153999	112862	1.36449	41137.3	15.3282
555.2268@1.2250001	3	3	0.892825	0.32082	17.5682	17.3309	1.17879	1.17879	194332	164857	1.17879	194332	164857	1.17879	29475.5	14.8472
1250.2778@0.92799985	3	3	0.20189	2.27659	16.8905	17.5863	-1.61969	1.61969	121495	196784	-1.61969	121495	196784	-1.61969	-75289.2	-16.2002
2225.4888@0.93299997	3	3	1.11364	2.85173	16.3076	17.3731	-2.09289	2.09289	81110.4	169755	-2.09289	81110.4	169755	-2.09289	-88644.6	-16.4357
278.0151@16.356	3	3	5.46375	2.48508	17.5134	15.717	3.47341	3.47341	187090	53863.4	3.47341	187090	53863.4	3.47341	133227	17.0235
666.2202@2.3239996	3	3	0.46198	1.25982	16.5303	16.8227	-1.22469	1.22469	94650.8	115918	-1.22469	94650.8	115918	-1.22469	-21267.5	-14.3764
257.0884@1.2089999	3	3	2.47336	5.04935	15.7653	17.4064	-3.11908	3.11908	55694.9	173717	-3.11908	55694.9	173717	-3.11908	-118022	-16.8487
1521.9344@0.934	3	3	1.0923	2.70708	16.5128	17.2802	-1.70224	1.70224	93505.2	159168	-1.70224	93505.2	159168	-1.70224	-65663.3	-16.0028
567.7468@16.442999	3	3	0.200584	0.701234	17.3484	17.6987	-1.27486	1.27486	166870	212736	-1.27486	166870	212736	-1.27486	-45866.1	-15.4851
1090.6863@4.903	3	3	0.955068	1.87824	17.7612	17.2904	1.38585	1.38585	222148	160297	1.38585	222148	160297	1.38585	61850.9	15.9165
555.0796@9.181	3	3	1.75892	2.14414	17.3343	15.3094	4.06979	4.06979	165252	40604.7	4.06979	165252	40604.7	4.06979	124648	16.9275
1397.2875@0.922	3	3	0.406474	1.18332	17.4913	17.964	-1.38776	1.38776	184247	255692	-1.38776	184247	255692	-1.38776	-71444.7	-16.1245
976.3666@7.747001	3	3	1.1815	1.65302	20.4372	20.9539	-1.43076	1.43076	1.4197e+06	2031257	-1.43076	1.4197e+06	2031257	-1.43076	-611553	-19.2221
354.1267@1.5430001	3	3	6.29353	6.97101	14.7774	16.62	-3.58663	3.58663	28082.8	100723	-3.58663	28082.8	100723	-3.58663	-72639.8	-16.1485
297.0329@4.3380003	3	3	0.118627	0.31246	17.0272	17.7609	-1.66283	1.66283	133569	222103	-1.66283	133569	222103	-1.66283	-88533.7	-16.4339
1627.5332@0.9169999	3	3	0.320964	1.62189	17.5262	18.0492	-1.43697	1.43697	188762	271247	-1.43697	188762	271247	-1.43697	-82484.2	-16.3318
475.2403@5.0439997	3	3	0.575081	1.378	17.9777	18.3945	-1.33488	1.33488	258131	344574	-1.33488	258131	344574	-1.33488	-86442.8	-16.3995
510.2675@5.1959996	3	3	0.788234	1.69928	17.3217	17.7906	-1.38407	1.38407	163814	226730	-1.38407	163814	226730	-1.38407	-62916.3	-15.9411
462.9196@5.451	3	3	1.07184	0.336851	16.9628	16.6859	1.21161	1.21161	127739	105429	1.21161	127739	105429	1.21161	22309.9	14.4454
630.0998@8.372001	3	3	1.94771	2.99068	16.7171	14.8296	3.69992	3.69992	107733	29117.5	3.69992	107733	29117.5	3.69992	78615.1	16.2625
456.2389@7.7620006	3	3	173.205	7.42083	14.3441	4.84913	721.572	721.572	20797.5	28.8225	721.572	20797.5	28.8225	721.572	20768.7	14.3421
217.8757@16.432001	3	3	0.611819	4.02126	14.9543	16.4385	-2.79755	2.79755	31747.2	88814.4	-2.79755	31747.2	88814.4	-2.79755	-57067.2	-15.8004
365.1152@5.4550004	3	3	1.87808	1.02234	16.8129	16.3606	1.36814	1.36814	115127	84148.3	1.36814	115127	84148.3	1.36814	30978.6	14.919
705.368@3.9739993	3	3	1.77354	2.65703	15.4209	16.1312	-1.63619	1.63619	43867.2	71775	-1.63619	43867.2	71775	-1.63619	-27907.8	-14.7684
1578.7345@0.9320001	3	3	0.892686	1.9042	17.3138	17.8567	-1.45698	1.45698	162915	237364	-1.45698	162915	237364	-1.45698	-74448.9	-16.184
824.4623@4.6780005	3	3	1.20002	0.955674	16.9087	16.3108	1.51354	1.51354	123035	81289.6	1.51354	123035	81289.6	1.51354	41745.2	15.3493
2866.2256@0.91300005	3	3	0.395833	2.25017	17.1185	17.75	-1.54912	1.54912	142294	220430	-1.54912	142294	220430	-1.54912	-78136.5	-16.2537
678.1207@7.451001	3	3	1.16029	2.68737	17.4511	15.3968	4.1535	4.1535	179188	43141.4	4.1535	179188	43141.4	4.1535	136046	17.0537
2541.209@0.926	3	3	0.607525	1.8177	16.9334	17.7034	-1.70523	1.70523	125161	213428	-1.70523	125161	213428	-1.70523	-88266.9	-16.4296
300.1399@1.217	3	3	0.519905	1.36379	17.5108	17.9693	-1.37413	1.37413	186757	256628	-1.37413	186757	256628	-1.37413	-69871.4	-16.0924
3002.689@0.923	3	3	1.42704	2.73736	16.9434	17.7888	-1.79665	1.79665	126034	226439	-1.79665	126034	226439	-1.79665	-100405	-16.6155
2683.9202@0.9139999	3	3	0.124373	2.51758	16.9884	17.7128	-1.65228	1.65228	130019	214828	-1.65228	130019	214828	-1.65228	-84808.4	-16.3719
1624.3369@0.926	3	3	0.45689	2.22693	17.9704	18.5702	-1.51549	1.51549	256818	389205	-1.51549	256818	389205	-1.51549	-132386	-17.0144
228.0752@3.0	3	3	0.618994	3.35077	16.2689	16.918	-1.56815	1.56815	78965.9	123830	-1.56815	78965.9	123830	-1.56815	-44864.1	-15.4533
1590.3527@0.923	3	3	0.842336	2.78145	17.0031	17.5618	-1.47297	1.47297	131352	193477	-1.47297	131352	193477	-1.47297	-62125.8	-15.9229
1581.3429@0.9320001	3	3	0.485626	1.69109	17.9217	18.3091	-1.30801	1.30801	248293	324770	-1.30801	248293	324770	-1.30801	-76477.8	-16.2228
1133.1942@1.0179999	3	3	0.672956	1.44035	15.8057	14.8413	1.95128	1.95128	57279.9	29355.1	1.95128	57279.9	29355.1	1.95128	27924.8	14.7693
788.3047@5.7200007	3	3	0.729328	1.32801	17.2756	16.5649	1.63663	1.63663	158664	96945.7	1.63663	158664	96945.7	1.63663	61718.7	15.9134
293.8761@16.571	3	3	0.698658	8.61227	14.9356	17.6791	-6.69677	6.69677	31338	209864	-6.69677	31338	209864	-6.69677	-178526	-17.4458
334.1058@5.9739995	3	3	2.0255	3.64296	17.2135	15.5735	3.11658	3.11658	151975	48763.3	3.11658	151975	48763.3	3.11658	103211	16.6552
936.6224@4.7960005	3	3	0.636973	0.490312	17.3867	17.1571	1.17245	1.17245	171361	146156	1.17245	171361	146156	1.17245	25205.3	14.6214
1622.5472@0.919	3	3	0.550617	1.02926	18.152	18.6709	-1.43287	1.43287	291277	417363	-1.43287	291277	417363	-1.43287	-126086	-16.9441
643.2427@1.241	3	3	0.701393	0.409112	17.7761	18.0976	-1.24963	1.24963	224459	280492	-1.24963	224459	280492	-1.24963	-56032.8	-15.774
568.2936@4.6360006	3	3	0.414639	4.20751	16.2252	17.2712	-2.06489	2.06489	76606.3	158184	-2.06489	76606.3	158184	-2.06489	-81577.2	-16.3159
335.944@4.1580005	3	3	2.46632	0.429388	17.9141	17.2568	1.57709	1.57709	246985	156608	1.57709	246985	156608	1.57709	90377.3	16.4637
1524.781@0.926	3	3	0.291088	2.03479	17.8397	18.6172	-1.71412	1.71412	234576	402092	-1.71412	234576	402092	-1.71412	-167515	-17.3539
889.2754@3.923	3	3	1.4516	3.04404	16.1629	16.7896	-1.54403	1.54403	73370.2	113286	-1.54403	73370.2	113286	-1.54403	-39915.8	-15.2847
3311.447@5.0740004	3	3	0.947196	1.44778	17.7134	17.3068	1.32555	1.32555	214912	162130	1.32555	214912	162130	1.32555	52781.8	15.6878
1697.5073@1.21	3	3	1.32326	3.40765	16.6545	17.4752	-1.76626	1.76626	103161	182209	-1.76626	103161	182209	-1.76626	-79048.1	-16.2704
1495.5203@5.664001	3	3	1.79701	3.9033	18.5693	17.6882	1.84179	1.84179	388972	211192	1.84179	388972	211192	1.84179	177780	17.4397
3357.6362@0.916	3	3	1.00465	4.23445	16.7797	17.6134	-1.78235	1.78235	112507	200528	-1.78235	112507	200528	-1.78235	-88020.5	-16.4256
299.165@4.742	3	3	2.08471	0.816436	18.318	18.998	-1.60211	1.60211	326787	523549	-1.60211	326787	523549	-1.60211	-196762	-17.5861
210.0807@5.2050004	3	3	3.311	0.753022	17.2886	16.5405	1.67962	1.67962	160103	95321	1.67962	160103	95321	1.67962	64781.6	15.9833
321.1399@4.464	3	3	5.41021	2.11514	15.3982	16.9719	-2.97671	2.97671	43183.4	128545	-2.97671	43183.4	128545	-2.97671	-85361.1	-16.3813
767.4027@4.5940003	3	3	1.89086	11.6586	14.7942	17.1346	-5.06452	5.06452	28411.4	143890	-5.06452	28411.4	143890	-5.06452	-115479	-16.8173
388.0776@1.2040001	3	3	0.6666	1.1934	18.1176	18.4206	-1.2337	1.2337	284412	350880	-1.2337	284412	350880	-1.2337	-66467.7	-16.0204
1368.2881@0.92399985	3	3	0.888252	0.620047	16.9739	17.6639	-1.61324	1.61324	128721	207659	-1.61324	128721	207659	-1.61324	-78937.5	-16.2684
158.0577@4.1559997	3	3	0.51172	0.924251	16.7023	16.9991	-1.22844	1.22844	106632	130992	-1.22844	106632	130992	-1.22844	-24359.4	-14.5722
1540.9308@0.92799985	3	3	0.038607	1.06946	16.9882	17.556	-1.48225	1.48225	130008	192704	-1.48225	130008	192704	-1.48225	-62696	-15.9361
550.2211@3.407	3	3	5.02498	0.923207	16.0026	16.9837	-1.97402	1.97402	65652.1	129599	-1.97402	65652.1	129599	-1.97402	-63946.6	-15.9646
244.0732@5.617	3	3	0.900848	1.20515	17.0504	16.1049	1.92588	1.92588	135731	70477.1	1.92588	135731	70477.1	1.92588	65253.5	15.9938
591.7494@3.7939997	3	3	1.30131	1.37786	16.5211	17.1633	-1.56072	1.56072	94049.2	146784	-1.56072	94049.2	146784	-1.56072	-52735.3	-15.6865
639.3461@5.355	3	3	0.0620995	1.03795	17.2799	16.9668	1.24234	1.24234	159134	128092	1.24234	159134	128092	1.24234	31042.3	14.9219
2684.585@0.9169999	3	3	0.385424	2.68642	16.4603	17.3215	-1.81655	1.81655	90165.4	163790	-1.81655	90165.4	163790	-1.81655	-73624.3	-16.1679
1542.8973@0.922	3	3	0.197746	0.631737	17.3865	17.95	-1.47783	1.47783	171343	253217	-1.47783	171343	253217	-1.47783	-81873.5	-16.3211
146.0577@1.9379998	3	3	3.8494	1.67516	17.1471	16.0794	2.09604	2.09604	145139	69244.5	2.09604	145139	69244.5	2.09604	75894.8	16.2117
152.0469@4.3790007	3	3	0.440637	0.438398	16.735	16.5631	1.12652	1.12652	109080	96828.7	1.12652	109080	96828.7	1.12652	12251.2	13.5806
630.1079@3.4710004	3	3	0.165679	0.307696	16.6401	16.8108	-1.12558	1.12558	102134	114960	-1.12558	102134	114960	-1.12558	-12826.1	-13.6468
824.2204@3.4570005	3	3	0.63416	0.519423	17.1534	17.393	-1.18067	1.18067	145779	172117	-1.18067	145779	172117	-1.18067	-26337.6	-14.6848
402.2886@4.2620006	3	3	1.76214	1.21651	15.8887	15.4889	1.3193	1.3193	60669.7	45986.2	1.3193	60669.7	45986.2	1.3193	14683.4	13.8419
222.9095@16.442999	3	3	1.18703	1.09496	16.5237	16.2094	1.24346	1.24346	94220.2	75772.3	1.24346	94220.2	75772.3	1.24346	18447.9	14.1712
141.8956@16.432001	3	3	5.99631	2.99162	17.02	15.6494	2.58569	2.58569	132899	51397.7	2.58569	132899	51397.7	2.58569	81500.9	16.3145
584.1986@4.5400004	3	3	4.0929	6.26395	16.267	18.7568	-5.6168	5.6168	78862.1	442952	-5.6168	78862.1	442952	-5.6168	-364090	-18.4739
794.3437@3.8440003	3	3	3.68272	0.254913	15.9946	16.9154	-1.89323	1.89323	65291.1	123611	-1.89323	65291.1	123611	-1.89323	-58320	-15.8317
334.0683@5.1930003	3	3	5.39667	3.75177	16.7327	15.2248	2.84385	2.84385	108902	38293.9	2.84385	108902	38293.9	2.84385	70608.3	16.1075
1618.6766@0.92399985	3	3	0.46821	2.08935	17.2401	18.2019	-1.9477	1.9477	154804	301511	-1.9477	154804	301511	-1.9477	-146708	-17.1626
354.1507@12.869002	3	3	5.19683	5.43863	14.8486	16.5491	-3.25022	3.25022	29502.9	95890.8	-3.25022	29502.9	95890.8	-3.25022	-66387.9	-16.0186
2522.1135@4.945	3	3	0.258296	2.53225	17.0308	17.6415	-1.52698	1.52698	133901	204465	-1.52698	133901	204465	-1.52698	-70563.4	-16.1066
2500.9565@0.923	3	3	0.843278	1.99492	16.5539	17.4457	-1.85546	1.85546	96212.6	178519	-1.85547	96212.6	178519	-1.85547	-82306.5	-16.3287
1608.4899@5.7169995	3	3	0.165598	0.74352	18.1827	17.7965	1.30695	1.30695	297544	227663	1.30695	297544	227663	1.30695	69881.2	16.0926
1585.3285@0.923	3	3	0.192005	1.68089	18.0555	18.6729	-1.53411	1.53411	272434	417944	-1.53411	272434	417944	-1.53411	-145510	-17.1508
310.0869@1.2320001	3	3	0.520591	1.50728	18.4603	17.943	1.43124	1.43124	360658	251990	1.43124	360658	251990	1.43124	108668	16.7296
464.9164@5.458	3	3	0.34139	0.659073	16.8834	16.5661	1.24607	1.24607	120899	97024.9	1.24607	120899	97024.9	1.24607	23874.6	14.5432
1532.5294@0.934	3	3	0.863187	1.99939	17.2669	17.865	-1.51367	1.51367	157712	238723	-1.51367	157712	238723	-1.51367	-81011.2	-16.3058
240.1257@6.884	3	3	1.93255	2.58297	15.8184	16.9096	-2.13054	2.13054	57783.6	123110	-2.13054	57783.6	123110	-2.13054	-65326.9	-15.9954
431.0056@1.403	3	3	173.205	2.23312	16.6089	5.67484	1956.53	1956.53	99950.4	51.0856	1956.53	99950.4	51.0856	1956.53	99899.3	16.6082
3068.2642@0.9169999	3	3	0.648122	1.36227	17.3778	17.9539	-1.49081	1.49081	170308	253896	-1.49081	170308	253896	-1.49081	-83588.4	-16.351
1750.779@7.5599995	3	3	1.82378	6.39745	15.5134	17.3179	-3.49301	3.49301	46774.1	163382	-3.49301	46774.1	163382	-3.49301	-116608	-16.8313
554.3132@4.764	3	3	0.337138	0.54336	17.191	16.9934	1.14683	1.14683	149628	130470	1.14683	149628	130470	1.14683	19157.5	14.2256
1592.1188@0.9429999	3	3	0.824834	1.56931	17.6364	18.2087	-1.48688	1.48688	203742	302940	-1.48688	203742	302940	-1.48688	-99197.4	-16.598
660.3667@4.478	3	3	1.44766	1.2963	18.2626	17.5546	1.6335	1.6335	314470	192513	1.6335	314470	192513	1.6335	121958	16.896
1444.1036@0.915	3	3	0.530193	2.24227	17.4136	18.088	-1.59592	1.59592	174590	278633	-1.59592	174590	278633	-1.59592	-104043	-16.6668
1584.531@0.93299997	3	3	0.376482	2.0199	17.136	17.8907	-1.68723	1.68723	144029	243010	-1.68723	144029	243010	-1.68723	-98981.1	-16.5949
1695.978@0.9209999	3	3	1.07089	2.09324	16.1268	17.2618	-2.19614	2.19614	71558.2	157152	-2.19614	71558.2	157152	-2.19614	-85593.4	-16.3852
1205.0605@3.1690001	3	3	0.257127	1.40227	16.0507	16.3669	-1.24501	1.24501	67881.4	84512.8	-1.24501	67881.4	84512.8	-1.24501	-16631.4	-14.0216
2855.8335@0.922	3	3	0.702457	2.19576	16.6103	17.4316	-1.76698	1.76698	100045	176777	-1.76698	100045	176777	-1.76698	-76732.7	-16.2276
551.7771@16.518002	3	3	0.159446	0.108778	16.8218	17.1604	-1.26456	1.26456	115840	146486	-1.26456	115840	146486	-1.26456	-30646.2	-14.9034
584.7586@3.8339999	3	3	1.87423	1.72665	15.5799	15.1341	1.36211	1.36211	48979.8	35958.7	1.36211	48979.8	35958.7	1.36211	13021.1	13.6686
1391.4839@1.2019999	3	3	1.11671	1.50119	17.048	16.6653	1.30375	1.30375	135506	103936	1.30375	135506	103936	1.30375	31570.8	14.9463
415.2328@5.353	3	3	0.359613	1.64262	17.1424	17.6863	-1.45789	1.45789	144673	210918	-1.45789	144673	210918	-1.45789	-66244.6	-16.0155
164.0469@4.8520007	3	3	0.954895	0.859478	16.2588	16.5809	-1.25014	1.25014	78412.1	98026.4	-1.25014	78412.1	98026.4	-1.25014	-19614.3	-14.2596
276.0989@5.738999	3	3	0.844481	2.09375	16.8159	15.5274	2.44271	2.44271	115370	47230.3	2.44271	115370	47230.3	2.44271	68139.4	16.0562
1611.3496@0.9169999	3	3	0.426661	1.03107	17.1355	17.6766	-1.45514	1.45514	143975	209503	-1.45514	143975	209503	-1.45514	-65528.4	-15.9998
131.9739@1.0060002	3	3	0.833006	0.241533	16.7437	16.447	1.22839	1.22839	109741	89336.8	1.22839	109741	89336.8	1.22839	20404	14.3166
1597.5205@4.214	3	3	0.353285	1.09809	17.8164	18.1715	-1.27911	1.27911	230816	295239	-1.27911	230816	295239	-1.27911	-64423.2	-15.9753
2872.215@0.9099999	3	3	0.638412	1.13363	16.7465	17.3106	-1.47844	1.47844	109952	162556	-1.47844	109952	162556	-1.47844	-52604.8	-15.6829
881.3464@1.2340001	3	3	0.325706	0.884032	17.7739	17.5091	1.20149	1.20149	224119	186534	1.20149	224119	186534	1.20149	37585.2	15.1979
1193.339@1.7549999	3	3	4.596	3.0335	16.4963	17.7895	-2.45057	2.45057	92447.6	226550	-2.45057	92447.6	226550	-2.45057	-134102	-17.033
3077.7146@0.91300005	3	3	0.434563	1.72373	17.4929	18.0431	-1.46435	1.46435	184450	270099	-1.46435	184450	270099	-1.46435	-85649.2	-16.3862
295.0721@1.2530001	3	3	0.733643	0.794137	16.2592	16.5476	-1.22131	1.22131	78432	95789.9	-1.22131	78432	95789.9	-1.22131	-17357.9	-14.0833
1163.231@7.002999	3	3	0.6224	1.20169	17.6444	17.2861	1.2819	1.2819	204872	159819	1.2819	204872	159819	1.2819	45052.8	15.4593
2540.8818@0.91300005	3	3	0.896961	2.48313	16.8246	17.6468	-1.76806	1.76806	116069	205217	-1.76806	116069	205217	-1.76806	-89148	-16.4439
624.2102@1.6270001	3	3	2.09228	0.59001	19.3292	18.8044	1.43868	1.43868	658669	457828	1.43868	658669	457828	1.43868	200842	17.6157
328.1848@3.5450003	3	3	5.23918	7.99841	15.1941	17.049	-3.61725	3.61725	37488.2	135604	-3.61725	37488.2	135604	-3.61725	-98115.8	-16.5822
244.1613@5.334	3	3	0.733113	2.18952	17.3601	16.8474	1.4268	1.4268	168237	117912	1.4268	168237	117912	1.4268	50324.6	15.619
1526.7516@0.923	3	3	0.844152	1.73269	18.1748	18.7175	-1.45665	1.45665	295916	431044	-1.45665	295916	431044	-1.45665	-135129	-17.044
228.0354@6.477	3	3	0.451601	1.31784	16.4455	17.0689	-1.54045	1.54045	89248	137482	-1.54045	89248	137482	-1.54045	-48234.1	-15.5578
144.0419@3.2490003	3	3	7.07915	2.90562	15.8518	17.6035	-3.36752	3.36752	59137.1	199145	-3.36752	59137.1	199145	-3.36752	-140008	-17.0952
183.8668@16.496998	3	3	0.698569	0.228348	16.9232	17.1952	-1.20746	1.20746	124276	150058	-1.20746	124276	150058	-1.20746	-25782.4	-14.6541
394.1409@3.9080007	3	3	0.216725	0.751221	16.9981	16.7879	1.15685	1.15685	130901	113153	1.15685	130901	113153	1.15685	17747.9	14.1154
630.0518@3.3810003	3	3	1.86851	1.45686	15.5496	16.1656	-1.53265	1.53265	47961.6	73508.4	-1.53265	47961.6	73508.4	-1.53265	-25546.8	-14.6409
2708.8394@1.191	3	3	0.256754	1.12614	15.3619	15.6027	-1.18165	1.18165	42109.5	49758.9	-1.18165	42109.5	49758.9	-1.18165	-7649.39	-12.9011
132.0351@16.389002	3	3	0.773105	2.09607	17.3837	18.0353	-1.57082	1.57082	171011	268629	-1.57082	171011	268629	-1.57082	-97617.4	-16.5749
1685.8291@4.904	3	3	0.8365	3.71988	15.9492	17.166	-2.32429	2.32429	63270.3	147059	-2.32429	63270.3	147059	-2.32429	-83788.2	-16.3545
459.9402@5.9759994	3	3	1.88738	2.7009	16.6045	15.1489	2.74269	2.74269	99646.2	36331.6	2.74269	99646.2	36331.6	2.74269	63314.6	15.9503
1446.4915@3.1049998	3	3	0.231886	3.53971	16.4074	17.3005	-1.85716	1.85716	86919.3	161423	-1.85716	86919.3	161423	-1.85716	-74504	-16.185
1354.4467@0.92799985	3	3	0.541096	1.59961	17.0693	17.6372	-1.48243	1.48243	137520	203863	-1.48243	137520	203863	-1.48243	-66343.4	-16.0177
685.7519@4.687	3	3	1.57849	0.349637	16.3753	15.907	1.38354	1.38354	85009	61443.1	1.38354	85009	61443.1	1.38354	23566	14.5244
288.1314@3.9389994	3	3	0.662158	1.29622	17.0491	16.6012	1.36405	1.36405	135613	99419.9	1.36405	135613	99419.9	1.36405	36193.5	15.1434
278.1191@4.5569997	3	3	1.6518	7.12133	16.4176	18.0103	-3.01605	3.01605	87537.2	264016	-3.01605	87537.2	264016	-3.01605	-176479	-17.4291
1250.0763@0.922	3	3	0.519727	1.98548	16.8654	17.5616	-1.62023	1.62023	119395	193448	-1.62023	119395	193448	-1.62023	-74052.6	-16.1763
1517.5498@4.3790007	3	3	1.83697	1.85606	16.4939	17.36	-1.82265	1.82265	92291.5	168215	-1.82265	92291.5	168215	-1.82265	-75923.8	-16.2123
2914.0076@0.92399985	3	3	0.624838	2.45093	15.8432	17.0286	-2.2742	2.2742	58786.9	133693	-2.2742	58786.9	133693	-2.2742	-74906.1	-16.1928
1542.9055@0.9169999	3	3	0.375867	1.19025	17.6129	18.0797	-1.38208	1.38208	200446	277033	-1.38208	200446	277033	-1.38208	-76586.8	-16.2248
2810.564@0.922	3	3	0.474638	2.38142	17.7741	18.4585	-1.6071	1.6071	224144	360222	-1.6071	224144	360222	-1.6071	-136077	-17.0541
1548.9084@0.92399985	3	3	1.01271	0.738278	17.6084	18.0856	-1.39209	1.39209	199825	278174	-1.39209	199825	278174	-1.39209	-78348.7	-16.2576
326.1757@6.872001	3	3	173.205	10.1005	14.5774	4.6923	945.577	945.577	24446.7	25.8537	945.577	24446.7	25.8537	945.577	24420.8	14.5758
1308.9738@0.9169999	3	3	0.627414	2.63415	16.5909	17.3657	-1.71093	1.71093	98712.7	168891	-1.71093	98712.7	168891	-1.71093	-70178.2	-16.0987
672.1051@1.6060001	3	3	1.09984	0.892172	17.4981	17.1192	1.30036	1.30036	185121	142361	1.30036	185121	142361	1.30036	42759.8	15.384
1147.6097@4.8730006	3	3	2.76304	1.47579	17.3212	16.6346	1.60943	1.60943	163754	101747	1.60943	163754	101747	1.60943	62007.8	15.9202
1551.5088@0.9320001	3	3	0.632863	0.374421	17.1193	17.4914	-1.29424	1.29424	142368	184258	-1.29424	142368	184258	-1.29424	-41890.5	-15.3543
2694.9888@0.93299997	3	3	0.730111	1.55075	17.1754	17.8384	-1.58337	1.58337	148018	234368	-1.58337	148018	234368	-1.58337	-86349.9	-16.3979
1367.9482@0.922	3	3	0.821386	3.61816	16.2739	17.4621	-2.27866	2.27866	79238.6	180558	-2.27866	79238.6	180558	-2.27866	-101319	-16.6286
648.7812@4.626	3	3	3.07106	4.52395	13.6005	16.1292	-5.77076	5.77076	12420.8	71677.7	-5.77076	12420.8	71677.7	-5.77076	-59256.8	-15.8547
744.14@0.94700015	3	3	0.837632	2.09565	17.1508	17.9694	-1.76371	1.76371	145514	256645	-1.76371	145514	256645	-1.76371	-111131	-16.7619
2860.5806@0.923	3	3	1.23411	1.66304	17.3896	17.9535	-1.47818	1.47818	171714	253825	-1.47818	171714	253825	-1.47818	-82110.3	-16.3253
348.1277@1.6130002	3	3	3.88809	0.420411	16.3267	17.9409	-3.06151	3.06151	82190.9	251628	-3.06151	82190.9	251628	-3.06151	-169438	-17.3704
2716.9482@0.922	3	3	0.778082	0.611975	16.534	17.384	-1.80245	1.80245	94893.5	171041	-1.80245	94893.5	171041	-1.80245	-76147.4	-16.2165
647.3456@4.6679997	3	3	1.63077	2.57922	18.1376	17.3705	1.70192	1.70192	288385	169447	1.70192	288385	169447	1.70192	118938	16.8598
1264.3876@3.437	3	3	2.00349	3.49855	15.3198	17.0201	-3.24967	3.24967	40900.3	132913	-3.24967	40900.3	132913	-3.24967	-92012.3	-16.4895
188.0468@5.23	3	3	0.649485	1.04722	16.9474	16.6132	1.26062	1.26062	126375	100249	1.26062	126375	100249	1.26062	26126.4	14.6732
3318.2256@0.934	3	3	1.15869	2.8827	16.3869	17.267	-1.84054	1.84054	85691.1	157718	-1.84054	85691.1	157718	-1.84054	-72027.2	-16.1363
167.0578@6.034	3	3	0.525429	0.68287	16.7047	16.9432	-1.17976	1.17976	106813	126014	-1.17976	106813	126014	-1.17976	-19200.6	-14.2289
3222.3076@0.91199994	3	3	0.351603	2.49598	16.7737	17.5628	-1.728	1.728	112044	193613	-1.728	112044	193613	-1.728	-81568.4	-16.3157
1386.911@0.9110002	3	3	0.707618	1.96299	17.0777	17.6912	-1.53005	1.53005	138320	211637	-1.53005	138320	211637	-1.53005	-73316.7	-16.1619
373.2204@4.6160007	3	3	1.33611	2.83817	16.467	17.1696	-1.62734	1.62734	90589	147419	-1.62734	90589	147419	-1.62734	-56829.8	-15.7944
554.3188@3.5330007	3	3	86.6215		0	11.0838	-2170.51	2170.51	1	2170.51	-2170.51	1	2170.51	-2170.51	-2169.51	-11.0832
2843.928@0.93299997	3	3	0.5676	1.97966	17.1646	17.7694	-1.52081	1.52081	146911	223424	-1.52081	146911	223424	-1.52081	-76512.9	-16.2234
1349.4622@0.92399985	3	3	0.270766	1.43641	17.1602	17.468	-1.23784	1.23784	146461	181295	-1.23784	146461	181295	-1.23784	-34834	-15.0882
3263.0466@0.922	3	3	0.298386	1.50126	17.3443	18.1409	-1.73696	1.73696	166404	289036	-1.73696	166404	289036	-1.73696	-122633	-16.904
147.9083@16.487	3	3	0.910026	0.866168	16.1926	16.6093	-1.3349	1.3349	74896.9	99979.6	-1.3349	74896.9	99979.6	-1.3349	-25082.7	-14.6144
434.1808@4.4000006	3	3	1.70701	1.62129	18.5306	17.884	1.56551	1.56551	378687	241894	1.56551	378687	241894	1.56551	136793	17.0616
326.1759@6.68	3	3	173.205	2.76606	14.1527	4.7203	690.926	690.926	18213.1	26.3604	690.926	18213.1	26.3604	690.926	18186.7	14.1506
441.8222@16.449001	3	3	1.04632	1.83868	16.6659	17.2023	-1.45038	1.45038	103975	150803	-1.45038	103975	150803	-1.45038	-46828	-15.5151
612.4182@14.067	3	3	173.205	2.80335	14.2718	4.79405	712.994	712.994	19780.6	27.743	712.994	19780.6	27.743	712.994	19752.8	14.2698
202.0474@3.5750005	3	3	2.5811	4.0824	16.3467	17.2384	-1.8554	1.8554	83337.1	154624	-1.8554	83337.1	154624	-1.8554	-71286.5	-16.1213
1695.5737@0.915	3	3	0.937621	4.28123	16.464	17.9227	-2.74854	2.74854	90399.6	248467	-2.74854	90399.6	248467	-2.74854	-158067	-17.2702
314.2453@7.4319997	3	3	2.5686	1.20514	17.8075	16.9997	1.75052	1.75052	229391	131042	1.75052	229391	131042	1.75052	98349.6	16.5856
1536.1171@0.922	3	3	0.632012	1.04094	17.7336	18.1008	-1.28987	1.28987	217942	281117	-1.28987	217942	281117	-1.28987	-63174.2	-15.947
1274.5852@4.7109995	3	3	1.45139	1.87418	16.5026	17.3789	-1.83567	1.83567	92848.6	170439	-1.83567	92848.6	170439	-1.83567	-77590.5	-16.2436
1095.1617@4.9459996	3	3	7.6071	3.18354	16.4528	14.8684	2.99885	2.99885	89697.1	29910.5	2.99885	89697.1	29910.5	2.99885	59786.7	15.8675
426.076@3.5429995	3	3	0.491957	0.0961221	17.0482	17.2027	-1.11305	1.11305	135523	150844	-1.11305	135523	150844	-1.11305	-15321.4	-13.9033
976.6479@4.9570003	3	3	1.26627	6.75609	17.6461	16.277	2.58313	2.58313	205115	79405.6	2.58313	205115	79405.6	2.58313	125710	16.9397
632.2638@3.8870008	3	3	4.81945	173.205	5.804	17.7082	-3832.89	3832.89	55.8699	214143	-3832.89	55.8699	214143	-3832.89	-214087	-17.7078
2041.0378@6.0919995	3	3	0.319991	0.218982	17.0736	17.2249	-1.1106	1.1106	137933	153189	-1.1106	137933	153189	-1.1106	-15255.5	-13.897
1251.2501@3.1609995	3	3	0.842107	1.84667	16.8387	17.401	-1.47659	1.47659	117206	173065	-1.47659	117206	173065	-1.47659	-55858.7	-15.7695
590.2135@1.611	3	3	0.635537	2.8597	18.9176	19.6323	-1.6412	1.6412	495175	812679	-1.6412	495175	812679	-1.6412	-317504	-18.2764
1665.3497@0.92399985	3	3	0.372344	3.20391	16.3595	17.3476	-1.98348	1.98348	84083.8	166779	-1.98348	84083.8	166779	-1.98348	-82694.7	-16.3355
2245.0615@5.473	3	3	0.79943	1.24928	16.6087	16.923	-1.24337	1.24337	99936.7	124258	-1.24337	99936.7	124258	-1.24337	-24321.3	-14.5699
397.8164@16.442999	3	3	4.4282	1.01497	16.333	17.2914	-1.94304	1.94304	82553.9	160406	-1.94304	82553.9	160406	-1.94304	-77851.9	-16.2484
580.0762@5.4500003	3	3	1.03836	0.331884	17.2492	16.9371	1.24155	1.24155	155786	125476	1.24155	155786	125476	1.24155	30309.4	14.8875
1589.7386@0.923	3	3	1.02018	2.09251	16.95	17.5094	-1.47373	1.47373	126603	186579	-1.47373	126603	186579	-1.47373	-59975.4	-15.8721
460.202@3.5230002	3	3	1.28139	1.48107	16.696	16.3052	1.31114	1.31114	106168	80974.2	1.31114	106168	80974.2	1.31114	25194.1	14.6208
498.1319@1.2019999	3	3	0.449989	2.22109	16.1593	17.0607	-1.86794	1.86794	73186.8	136709	-1.86794	73186.8	136709	-1.86794	-63521.9	-15.955
365.1248@3.298	3	3	1.23592	3.04456	16.8901	16.1972	1.61652	1.61652	121461	75137.7	1.61652	121461	75137.7	1.61652	46323.8	15.4995
1695.1733@0.9209999	3	3	1.23975	3.60815	16.2394	17.6973	-2.74713	2.74713	77364.4	212530	-2.74713	77364.4	212530	-2.74713	-135165	-17.0444
1026.2831@3.5239997	3	3	0.517774	1.52511	17.7187	18.2003	-1.39634	1.39634	215702	301193	-1.39634	215702	301193	-1.39634	-85490.9	-16.3835
754.2642@3.4220006	3	3	2.47634	1.25173	18.6209	17.9207	1.62464	1.62464	403120	248130	1.62464	403120	248130	1.62464	154991	17.2418
1347.4908@0.9209999	3	3	0.609849	2.06823	17.595	18.0524	-1.3731	1.3731	197977	271843	-1.3731	197977	271843	-1.3731	-73865.8	-16.1726
122.0365@3.7089999	3	3	0.634244	1.94041	17.1176	16.5485	1.48359	1.48359	142208	95853.5	1.48359	142208	95853.5	1.48359	46354.1	15.5004
379.0353@4.4319997	3	3	0.618715	0.686212	16.1578	16.4368	-1.2134	1.2134	73108.9	88710.3	-1.2134	73108.9	88710.3	-1.2134	-15601.4	-13.9294
1700.4261@0.9320001	3	3	0.56769	2.10589	16.17	17.1221	-1.93474	1.93474	73732.4	142653	-1.93474	73732.4	142653	-1.93474	-68920.4	-16.0726
336.168@5.2060003	3	3	1.72779	2.05837	16.0623	17.03	-1.95578	1.95578	68427.3	133829	-1.95578	68427.3	133829	-1.95578	-65401.3	-15.997
496.2519@5.32	3	3	0.426704	0.292331	16.8228	16.516	1.23692	1.23692	115920	93716.9	1.23692	115920	93716.9	1.23692	22203.2	14.4385
264.0972@6.298	3	3	0.663823	0.257601	16.7867	16.9917	-1.15266	1.15266	113057	130317	-1.15266	113057	130317	-1.15266	-17259.7	-14.0751
3367.2095@0.92399985	3	3	0.363158	2.50302	17.4138	18.0622	-1.56746	1.56746	174613	273698	-1.56746	174613	273698	-1.56746	-99085.4	-16.5964
1516.654@0.923	3	3	0.406528	2.49857	16.7539	17.4913	-1.66721	1.66721	110514	184251	-1.66721	110514	184251	-1.66721	-73736.6	-16.1701
200.0834@5.620999	3	3	0.673903	1.55716	16.7861	15.8321	1.93734	1.93734	113013	58334.4	1.93734	113013	58334.4	1.93734	54678.9	15.7387
680.0823@7.4290004	3	3	1.03152	1.25215	16.66	16.2266	1.35034	1.35034	103549	76683.7	1.35034	103549	76683.7	1.35034	26865.7	14.7135
1594.5087@5.3100004	3	3	0.93375	3.43743	17.0717	19.2833	-4.6318	4.6318	137752	638042	-4.6318	137752	638042	-4.6318	-500289	-18.9324
124.0887@4.853	3	3	1.84999	1.23509	17.0674	16.4723	1.51058	1.51058	137344	90921.5	1.51058	137344	90921.5	1.51058	46422.7	15.5025
1446.6906@0.926	3	3	0.459179	0.184388	17.5711	17.8317	-1.19796	1.19796	194728	233275	-1.19796	194728	233275	-1.19796	-38547.7	-15.2344
1120.6134@16.444	3	3	2.91597	173.205	3.46339	16.8008	-10350.3	10350.3	11.0302	114166	-10350.3	11.0302	114166	-10350.3	-114155	-16.8006
1142.1766@0.99600005	3	3	0.713988	0.260827	17.0512	17.4964	-1.36146	1.36146	135807	184897	-1.36146	135807	184897	-1.36146	-49089.6	-15.5831
1517.3408@0.9169999	3	3	0.675993	2.54722	17.6651	18.8028	-2.20016	2.20016	207845	457293	-2.20016	207845	457293	-2.20016	-249448	-17.9284
278.093@3.7900007	3	3	0.808331	0.628149	16.987	17.2614	-1.20951	1.20951	129895	157110	-1.20951	129895	157110	-1.20951	-27214.8	-14.7321
533.2632@4.424	3	3	2.99774		0	15.3115	-40664.3	40664.3	1	40664.3	-40664.3	1	40664.3	-40664.3	-40663.3	-15.3114
3364.312@0.922	3	3	0.0232851	1.92451	17.0241	17.6613	-1.55531	1.55531	133283	207297	-1.55531	133283	207297	-1.55531	-74013.8	-16.1755
2229.0452@5.564999	3	3	1.02232	1.56578	16.7583	17.4187	-1.58054	1.58054	110854	175209	-1.58054	110854	175209	-1.58054	-64355	-15.9738
569.2436@4.0050006	3	3	0.710873	5.20795	18.361	17.2396	2.17554	2.17554	336669	154752	2.17553	336669	154752	2.17553	181916	17.4729
451.1072@3.8559992	3	3	1.24813	2.48009	16.4832	15.4989	1.97833	1.97833	91608.1	46305.7	1.97833	91608.1	46305.7	1.97833	45302.4	15.4673
567.5896@16.519	3	3	0.465977	1.15613	17.3288	17.6291	-1.23141	1.23141	164620	202714	-1.23141	164620	202714	-1.23141	-38094	-15.2173
1638.3218@0.923	3	3	0.264949	2.13895	16.8077	17.2819	-1.38913	1.38913	114714	159353	-1.38913	114714	159353	-1.38913	-44638.7	-15.446
1207.5575@4.9889994	3	3	0.495685	1.37516	15.2274	16.6812	-2.73947	2.73947	38361	105089	-2.73947	38361	105089	-2.73947	-66727.8	-16.026
757.6393@1.1590002	3	3	3.09391	0.787898	17.79	17.157	1.55075	1.55075	226632	146144	1.55075	226632	146144	1.55075	80488.1	16.2965
2821.4778@0.922	3	3	0.373467	1.4182	16.9546	17.5014	-1.46085	1.46085	127013	185546	-1.46085	127013	185546	-1.46085	-58533.8	-15.837
616.2105@3.3940008	3	3	2.2625	2.07551	17.2549	16.6317	1.54025	1.54025	156400	101542	1.54025	156400	101542	1.54025	54858.2	15.7434
1541.3248@0.934	3	3	0.463123	3.01163	17.5535	18.1731	-1.53648	1.53648	192366	295565	-1.53648	192366	295565	-1.53648	-103200	-16.6551
1637.122@0.923	3	3	0.180836	1.43423	17.9054	18.3298	-1.34204	1.34204	245505	329478	-1.34204	245505	329478	-1.34204	-83972.4	-16.3576
2942.129@0.9320001	3	3	0.270042	2.54192	16.6401	17.6863	-2.06503	2.06503	102135	210912	-2.06503	102135	210912	-2.06503	-108777	-16.731
2851.2622@0.922	3	3	0.561422	2.76971	16.6915	17.7165	-2.03499	2.03499	105839	215381	-2.03499	105839	215381	-2.03499	-109542	-16.7411
2865.291@5.379001	3	3	0.416517	10.9395	14.3905	16.8162	-5.37307	5.37307	21477	115397	-5.37307	21477	115397	-5.37307	-93920.2	-16.5191
670.4286@10.086999	3	3		89.6067	7.96099	0	249.171	249.171	249.171	1	249.171	249.171	1	249.171	248.171	7.95519
2968.6614@0.923	3	3	0.160418	3.46093	17.0329	17.8954	-1.81823	1.81823	134093	243812	-1.81823	134093	243812	-1.81823	-109719	-16.7435
350.0629@5.749	3	3	173.205	3.57697	16.188	4.74131	2791.29	2791.29	74658.7	26.7471	2791.29	74658.7	26.7471	2791.29	74631.9	16.1875
1313.4191@3.93	3	3	3.92824	0.880169	16.2474	17.15	-1.86941	1.86941	77797.9	145437	-1.86941	77797.9	145437	-1.86941	-67638.6	-16.0456
1949.9365@5.4179997	3	3	0.227703	1.62153	16.8731	17.1981	-1.25272	1.25272	120032	150367	-1.25272	120032	150367	-1.25272	-30335	-14.8887
1432.7125@0.9209999	3	3	0.936781	1.56429	16.9454	17.5286	-1.49814	1.49814	126207	189076	-1.49814	126207	189076	-1.49814	-62868.7	-15.9401
1600.4331@5.664001	3	3	0.308516	1.05295	18.631	18.2673	1.28671	1.28671	405959	315502	1.28671	405959	315502	1.28671	90457.1	16.4649
1533.3258@0.934	3	3	0.715741	2.04513	17.4522	18.0266	-1.48914	1.48914	179318	267030	-1.48914	179318	267030	-1.48914	-87711.2	-16.4205
1462.2871@0.923	3	3	0.445942	1.71727	17.6197	18.0925	-1.38787	1.38787	201394	279508	-1.38787	201394	279508	-1.38787	-78113.8	-16.2533
212.1046@5.147	3	3	2.274	1.05672	16.7774	16.1323	1.5638	1.5638	112331	71831.6	1.5638	112331	71831.6	1.5638	40499	15.3056
1261.8141@4.9350004	3	3	1.26803	0.542381	17.8509	17.553	1.22933	1.22933	236401	192300	1.22933	236401	192300	1.22933	44100.8	15.4285
2869.9058@0.922	3	3	1.45774	5.20358	16.223	17.26	-2.05194	2.05194	76492.8	156959	-2.05194	76492.8	156959	-2.05194	-80465.9	-16.2961
788.7522@5.7200007	3	3	1.45797	1.06777	20.8721	20.2679	1.52011	1.52011	1.91919e+06	1.26253e+06	1.52011	1.91919e+06	1.26253e+06	1.52011	656658	19.3248
315.1783@4.1959996	3	3	1.76362	1.37741	16.8849	17.3919	-1.42108	1.42108	121025	171986	-1.42108	121025	171986	-1.42108	-50960.9	-15.6371
1155.7626@4.951	3	3	3.68572	0.237385	16.9679	16.254	1.64023	1.64023	128184	78150	1.64023	128184	78150	1.64023	50033.6	15.6106
803.3888@4.6570005	3	3	1.89051	1.5603	17.1155	16.4653	1.56942	1.56942	142002	90480.5	1.56942	142002	90480.5	1.56942	51521.1	15.6529
285.1682@3.743	3	3	3.86027	2.28542	17.6873	16.395	2.44913	2.44913	211058	86176.5	2.44913	211058	86176.5	2.44913	124881	16.9302
1209.7686@4.883	3	3	1.10833	3.5859	17.2495	16.5156	1.66316	1.66316	155823	93690.4	1.66316	155823	93690.4	1.66316	62132.1	15.9231
356.0735@3.965	3	3	0.0936481	0.907268	17.3799	17.0987	1.21521	1.21521	170556	140351	1.21521	170556	140351	1.21521	30204.6	14.8825
381.0244@11.101998	3	3	4.27388	4.3087	15.7972	14.7191	2.11125	2.11125	56940.7	26970.2	2.11125	56940.7	26970.2	2.11125	29970.5	14.8713
630.1419@3.2120001	3	3	173.205	4.42045	14.5008	4.92481	763.218	763.218	23182.7	30.3749	763.218	23182.7	30.3749	763.218	23152.3	14.4989
730.3469@0.9169999	3	3	0.59592	2.50205	16.7892	17.3594	-1.48474	1.48474	113252	168149	-1.48474	113252	168149	-1.48474	-54897	-15.7444
880.2707@3.375	3	3	1.75792	1.61208	15.927	16.7099	-1.72058	1.72058	62302.5	107196	-1.72058	62302.5	107196	-1.72058	-44893.7	-15.4542
2872.6265@0.93900007	3	3	0.483529	1.90566	16.7561	17.382	-1.54326	1.54326	110683	170812	-1.54326	110683	170812	-1.54326	-60129.2	-15.8758
977.2052@3.1909997	3	3	1.32458	3.65584	15.8496	16.8875	-2.05321	2.05321	59047.3	121237	-2.05321	59047.3	121237	-2.05321	-62189.5	-15.9244
1540.7097@0.9320001	3	3	0.445419	3.48872	17.2996	18.0255	-1.65394	1.65394	161323	266819	-1.65394	161323	266819	-1.65394	-105495	-16.6868
288.888@16.438997	3	3	0.651076	1.4995	16.7779	16.441	1.2631	1.2631	112373	88966.2	1.2631	112373	88966.2	1.2631	23406.9	14.5146
820.4102@5.82	3	3	0.0859279	0.464304	17.3962	17.2001	1.14561	1.14561	172501	150575	1.14561	172501	150575	1.14561	21925.8	14.4203
1026.3022@1.2320001	3	3	0.899644	0.597224	17.2814	17.0147	1.20305	1.20305	159302	132415	1.20305	159302	132415	1.20305	26887.2	14.7146
1262.2115@8.630999	3	3	1.70075	5.611	16.6053	13.9201	6.43183	6.43183	99700.2	15501.1	6.43183	99700.2	15501.1	6.43183	84199.1	16.3615
2859.273@0.934	3	3	0.436872	1.63902	17.5063	17.9438	-1.35423	1.35423	186173	252120	-1.35423	186173	252120	-1.35423	-65947.7	-16.009
664.1049@6.4779997	3	3	2.71642	2.2709	16.9515	15.469	2.79425	2.79425	126736	45355.8	2.79425	126736	45355.8	2.79425	81379.9	16.3124
292.0432@1.6169999	3	3	0.594592	0.889321	23.652	23.3184	1.26013	1.26013	13181192	10460186	1.26013	13181192	10460186	1.26013	2721006	21.3757
590.1665@1.2340001	3	3	0.586219	0.504509	17.4731	17.7609	-1.22076	1.22076	181938	222102	-1.22076	181938	222102	-1.22076	-40164.2	-15.2936
329.0558@3.6230001	3	3	0.629516	0.994503	16.366	16.6705	-1.23495	1.23495	84462.9	104307	-1.23495	84462.9	104307	-1.23495	-19844.4	-14.2764
3088.645@0.915	3	3	0.372457	1.13505	17.2638	17.7754	-1.42561	1.42561	157371	224350	-1.42561	157371	224350	-1.42561	-66979.2	-16.0314
770.1117@6.8509984	3	3	1.07977	0.288536	16.4055	15.0951	2.48009	2.48009	86804.4	35000.5	2.48009	86804.4	35000.5	2.48009	51803.9	15.6608
550.7001@4.5380006	3	3	1.8783	1.23499	15.8707	16.3716	-1.41514	1.41514	59917.6	84792.1	-1.41515	59917.6	84792.1	-1.41515	-24874.5	-14.6024
474.3188@12.375	3	3	0.446598	1.54984	17.7915	17.4541	1.26344	1.26344	226867	179563	1.26344	226867	179563	1.26344	47304.3	15.5297
2867.0269@0.926	3	3	0.578416	1.38364	16.668	17.3914	-1.65104	1.65104	104128	171919	-1.65104	104128	171919	-1.65104	-67791.1	-16.0488
323.0631@5.1720004	3	3	0.93633	0.994494	16.5267	15.9472	1.49431	1.49431	94413.8	63182.1	1.49431	94413.8	63182.1	1.49431	31231.8	14.9307
230.051@6.9210005	3	3	0.675396	2.16066	15.9	16.821	-1.89353	1.89353	61146.1	115782	-1.89353	61146.1	115782	-1.89353	-54635.8	-15.7376
685.3857@4.5019994	3	3	1.42391	0.348736	17.4295	17.8477	-1.33626	1.33626	176520	235876	-1.33626	176520	235876	-1.33626	-59355.9	-15.8571
952.6438@4.9290004	3	3	0.484968	0.366618	19.7182	19.5373	1.1336	1.1336	862543	760886	1.1336	862543	760886	1.1336	101657	16.6333
163.0301@1.7670001	3	3	0.624367	0.433007	16.7705	16.4512	1.24768	1.24768	111794	89601.9	1.24768	111794	89601.9	1.24768	22192.2	14.4378
478.0897@1.4370002	3	3	0.0621655	0.376256	16.964	17.1312	-1.12288	1.12288	127840	143548	-1.12288	127840	143548	-1.12288	-15708.4	-13.9392
2694.5796@0.90699995	3	3	0.281447	1.37595	18.1083	18.7126	-1.52025	1.52025	282578	429590	-1.52025	282578	429590	-1.52025	-147012	-17.1656
1374.456@0.926	3	3	1.10539	2.0196	16.8182	17.475	-1.57664	1.57664	115550	182180	-1.57664	115550	182180	-1.57664	-66630.6	-16.0239
357.0691@3.975	3	3	0.355935	1.15986	16.9699	16.4956	1.38928	1.38928	128366	92397	1.38928	128366	92397	1.38928	35968.7	15.1345
385.1685@14.071	3	3	1.95742	0.463021	17.1659	16.4407	1.65322	1.65322	147050	88947.4	1.65322	147050	88947.4	1.65322	58102.4	15.8263
1632.5142@0.92399985	3	3	0.494702	2.06849	17.5076	18.2133	-1.63096	1.63096	186340	303913	-1.63096	186340	303913	-1.63096	-117573	-16.8432
853.3513@4.9249997	3	3	2.09183	2.50892	14.9486	16.2257	-2.42355	2.42355	31620.8	76634.6	-2.42355	31620.8	76634.6	-2.42355	-45013.7	-15.4581
806.7918@4.2099996	3	3	1.02119	8.51659	16.0675	17.7948	-3.31117	3.31117	68675.3	227396	-3.31117	68675.3	227396	-3.31117	-158720	-17.2761
2798.596@0.92399985	3	3	0.538243	1.58183	17.2833	17.9884	-1.63026	1.63026	159514	260049	-1.63026	159514	260049	-1.63026	-100535	-16.6173
1194.3394@1.2110001	3	3	1.02352	4.27555	18.6267	19.5337	-1.87522	1.87522	404745	758985	-1.87522	404745	758985	-1.87522	-354240	-18.4344
1789.7965@4.714	3	3	1.86536	0.279618	16.1848	17.1163	-1.90723	1.90723	74492	142073	-1.90723	74492	142073	-1.90723	-67581.1	-16.0443
603.2885@4.597	3	3	3.26879	2.78663	18.6538	16.9067	3.35684	3.35684	412445	122867	3.35684	412445	122867	3.35684	289578	18.1436
701.3228@3.5330007	3	3	0.360446	1.08118	16.2446	16.5524	-1.23778	1.23778	77646.3	96109	-1.23778	77646.3	96109	-1.23778	-18462.7	-14.1723
558.2376@1.618	3	3	2.9071	1.28758	17.1179	17.869	-1.68309	1.68309	142231	239387	-1.68309	142231	239387	-1.68309	-97155.9	-16.568
290.0418@6.432999	3	3	1.73627	1.37113	16.3199	15.5868	1.66216	1.66216	81802.2	49214.3	1.66216	81802.2	49214.3	1.66216	32587.9	14.992
1606.3721@0.92399985	3	3	1.22935	2.05409	18.0956	19.1913	-2.13723	2.13723	280103	598647	-2.13723	280103	598647	-2.13723	-318543	-18.2811
591.237@3.5300002	3	3	0.480941	2.93432	17.7643	16.9841	1.7173	1.7173	222626	129637	1.7173	222626	129637	1.7173	92988.7	16.5048
511.9817@1.1359999	3	3	0.0177442	0.0627114	17.1094	16.9778	1.0955	1.0955	141394	129069	1.0955	141394	129069	1.0955	12325.5	13.5894
1560.4655@5.6419997	3	3	3.56665	1.33326	17.9725	17.1319	1.79089	1.79089	257201	143616	1.79089	257201	143616	1.79089	113585	16.7934
421.8049@16.492002	3	3	0.917354	0.604735	17.8216	18.2171	-1.3154	1.3154	231658	304724	-1.3154	231658	304724	-1.3154	-73065.5	-16.1569
851.407@3.576	3	3	4.08299	7.43524	14.3363	16.6764	-5.06331	5.06331	20685.5	104737	-5.06331	20685.5	104737	-5.06331	-84051.5	-16.359
631.1701@1.611	3	3	4.32792	0.647033	18.2741	17.3801	1.85829	1.85829	316996	170584	1.85829	316996	170584	1.85829	146412	17.1597
755.2545@5.8839993	3	3	2.51344	0.237379	18.1198	17.2071	1.88254	1.88254	284836	151304	1.88254	284836	151304	1.88254	133532	17.0268
479.234@3.2339997	3	3	4.14749	173.205	5.42425	16.5167	-2183.57	2183.57	42.9401	93762.9	-2183.57	42.9401	93762.9	-2183.57	-93719.9	-16.5161
408.2003@3.437	3	3	173.205	10.4544	13.3889	4.44981	490.835	490.835	10726.6	21.8537	490.835	10726.6	21.8537	490.835	10704.7	13.386
842.958@0.94200003	3	3	1.752	5.27486	14.5463	16.3224	-3.42498	3.42498	23926.6	81948.2	-3.42497	23926.6	81948.2	-3.42497	-58021.5	-15.8243
3211.9136@0.934	3	3	0.305843	2.1378	16.8946	17.4579	-1.47772	1.47772	121834	180036	-1.47772	121834	180036	-1.47772	-58201.9	-15.8288
636.3762@4.5719995	3	3	3.49648	7.48924	14.731	16.3292	-3.02772	3.02772	27193.1	82333	-3.02772	27193.1	82333	-3.02772	-55139.9	-15.7508
1566.8236@5.1699996	3	3	0.292291	4.50818	16.1287	16.9762	-1.79937	1.79937	71649.7	128925	-1.79937	71649.7	128925	-1.79937	-57274.8	-15.8056
344.1593@4.895	3	3	0.970511	0.585423	19.4185	19.7494	-1.25782	1.25782	700729	881391	-1.25782	700729	881391	-1.25782	-180662	-17.4629
1492.3062@0.923	3	3	0.24904	1.45696	17.9967	18.4659	-1.38435	1.38435	261538	362058	-1.38435	261538	362058	-1.38435	-100521	-16.6171
808.2616@4.111	3	3	1.56038	2.43823	17.9589	17.0287	1.90544	1.90544	254776	133710	1.90544	254776	133710	1.90544	121066	16.8854
3089.024@0.9209999	3	3	0.517007	1.03857	17.0147	17.4517	-1.35375	1.35375	132415	179258	-1.35375	132415	179258	-1.35375	-46842.5	-15.5155
394.1011@5.139	3	3	0.526778	0.548175	16.7024	16.284	1.33647	1.33647	106644	79794.9	1.33647	106644	79794.9	1.33647	26848.7	14.7126
1589.1104@0.9650001	3	3	0.264739	1.34621	17.5602	17.9541	-1.31398	1.31398	193256	253935	-1.31398	193256	253935	-1.31398	-60679.1	-15.8889
2832.2659@0.922	3	3	0.617136	4.36162	16.0227	17.0968	-2.10545	2.10545	66574.9	140170	-2.10545	66574.9	140170	-2.10545	-73595.1	-16.1673
1010.1893@1.0200001	3	3	0.719174	0.379506	16.3404	15.9221	1.33633	1.33633	82972.9	62090.2	1.33633	82972.9	62090.2	1.33633	20882.7	14.35
958.639@4.8919997	3	3	0.860497	0.944135	17.8149	16.0045	3.50726	3.50726	230577	65742.8	3.50726	230577	65742.8	3.50726	164834	17.3307
274.107@4.2550006	3	3	0.877269	1.51521	17.254	16.8936	1.28376	1.28376	156305	121756	1.28376	156305	121756	1.28376	34549	15.0764
508.2365@3.3320005	3	3	1.33087	1.19567	15.5654	16.0231	-1.37331	1.37331	48490.5	66592.4	-1.37331	48490.5	66592.4	-1.37331	-18101.8	-14.1438
2649.8762@0.922	3	3	0.853949	1.77299	15.9285	16.8566	-1.9027	1.9027	62367.6	118667	-1.9027	62367.6	118667	-1.9027	-56299.4	-15.7808
166.0268@3.6609995	3	3	1.25663	0.979403	16.631	16.994	-1.28613	1.28613	101489	130529	-1.28613	101489	130529	-1.28613	-29039.4	-14.8257
381.1371@4.027	3	3	4.65367	173.205	5.08684	15.697	-1563.05	1563.05	33.9853	53120.9	-1563.05	33.9853	53120.9	-1563.05	-53086.9	-15.6961
307.8622@16.496	3	3	0.347459	1.42587	17.0636	17.3968	-1.25981	1.25981	136977	172566	-1.25981	136977	172566	-1.25981	-35588.7	-15.1191
1636.4309@5.7169995	3	3	1.65035	3.03041	17.5311	16.6161	1.88559	1.88559	189400	100446	1.88559	189400	100446	1.88559	88953.7	16.4408
854.2933@3.6959994	3	3	2.08066	173.205	5.02855	15.7083	-1640.27	1640.27	32.6395	53537.7	-1640.28	32.6395	53537.7	-1640.28	-53505.1	-15.7074
430.2054@4.022	3	3	0.288579	0.570675	20.1841	20.3924	-1.15533	1.15533	1.19131e+06	1.37635e+06	-1.15533	1.19131e+06	1.37635e+06	-1.15533	-185041	-17.4975
288.0626@4.862	3	3	1.61004	2.2392	16.0366	15.4417	1.51032	1.51032	67218.6	44506.3	1.51032	67218.6	44506.3	1.51032	22712.3	14.4712
2710.5527@0.923	3	3	0.382776	1.33622	17.587	18.0079	-1.33877	1.33877	196883	263581	-1.33877	196883	263581	-1.33877	-66698.6	-16.0254
2536.2202@0.923	3	3	1.07817	1.65632	16.1125	16.6671	-1.4688	1.4688	70851	104066	-1.4688	70851	104066	-1.4688	-33215.2	-15.0196
1460.4661@1.6189996	3	3	0.829643	0.612764	16.9635	16.6947	1.20484	1.20484	127801	106073	1.20484	127801	106073	1.20484	21727.9	14.4073
1631.5228@0.949	3	3	0.617972	1.47775	17.5769	18.1671	-1.50545	1.50545	195518	294344	-1.50545	195518	294344	-1.50545	-98825.5	-16.5926
796.4348@4.786	3	3	0.759669	0.77543	17.614	17.3475	1.20295	1.20295	200610	166766	1.20295	200610	166766	1.20295	33844.4	15.0466
1192.3248@1.255	3	3	0.597482	1.66725	17.1451	17.5561	-1.32965	1.32965	144936	192715	-1.32965	144936	192715	-1.32965	-47778.1	-15.5441
185.0807@3.143	3	3		87.0875	10.5283	0	1476.86	1476.86	1476.86	1	1476.86	1476.86	1	1476.86	1475.86	10.5273
1004.6893@4.881	3	3	1.19112	0.230372	18.9753	18.5235	1.36781	1.36781	515396	376803	1.36781	515396	376803	1.36781	138592	17.0805
421.241@1.6829998	3	3	2.02766	2.27461	15.1097	15.8529	-1.67384	1.67384	35357.7	59183.2	-1.67384	35357.7	59183.2	-1.67384	-23825.5	-14.5402
2286.9463@5.855	3	3	0.38424	0.867374	16.8688	17.1933	-1.25226	1.25226	119679	149869	-1.25226	119679	149869	-1.25226	-30190.1	-14.8818
1746.7382@5.5159993	3	3	1.06403	4.55142	15.5006	16.9647	-2.75906	2.75906	46359.1	127908	-2.75906	46359.1	127908	-2.75906	-81548.6	-16.3154
1340.3004@0.923	3	3	0.79633	3.33265	16.591	17.4726	-1.84237	1.84237	98719.5	181878	-1.84237	98719.5	181878	-1.84237	-83158.6	-16.3436
942.128@9.387	3	3	8.2431	3.80932	16.4469	14.7681	3.20149	3.20149	89332	27903.2	3.20149	89332	27903.2	3.20149	61428.8	15.9066
3367.173@0.9169999	3	3	0.467507	2.59224	16.8481	17.4676	-1.53634	1.53634	117974	181248	-1.53634	117974	181248	-1.53634	-63274.5	-15.9493
1338.7963@0.922	3	3	0.835778	2.90015	17.4253	18.5632	-2.20057	2.20057	176014	387332	-2.20057	176014	387332	-2.20057	-211318	-17.6891
405.2097@3.4160001	3	3	7.67296	7.52765	17.6245	15.4313	4.57297	4.57297	202065	44186.8	4.57297	202065	44186.8	4.57297	157878	17.2685
1345.2897@0.91300005	3	3	0.54636	1.64803	16.6895	17.5536	-1.82027	1.82027	105691	192386	-1.82027	105691	192386	-1.82027	-86695.2	-16.4037
740.1478@7.4489994	3	3	1.9913	2.19303	16.4833	15.897	1.50146	1.50146	91617.6	61019.2	1.50146	91617.6	61019.2	1.50146	30598.4	14.9012
1541.5054@4.0050006	3	3	0.653831	4.66552	16.2114	17.1181	-1.87478	1.87478	75877	142253	-1.87478	75877	142253	-1.87478	-66375.8	-16.0184
2639.201@4.522	3	3	0.478388	7.63462	15.0718	16.8891	-3.52429	3.52429	34439.9	121376	-3.52429	34439.9	121376	-3.52429	-86936.1	-16.4077
1149.1632@1.007	3	3	3.04154	3.02882	15.5829	14.5967	1.98085	1.98085	49080.8	24777.6	1.98085	49080.8	24777.6	1.98085	24303.2	14.5689
231.056@4.0999994	3	3	0.130692	0.266853	16.6762	16.5266	1.10927	1.10927	104721	94406	1.10927	104721	94406	1.10927	10315.3	13.3325
1454.687@0.91300005	3	3	0.71919	1.1387	17.0051	17.4606	-1.37127	1.37127	131536	180371	-1.37127	131536	180371	-1.37127	-48835.6	-15.5756
1482.1371@0.92399985	3	3	0.24205	1.61938	18.3065	18.7595	-1.36885	1.36885	324200	443781	-1.36885	324200	443781	-1.36885	-119581	-16.8676
338.1758@7.5889997	3	3	173.205	6.27135	13.7765	4.69836	540.502	540.502	14032.8	25.9625	540.502	14032.8	25.9625	540.502	14006.8	13.7738
3346.736@0.9169999	3	3	0.403519	2.03541	17.295	18.1052	-1.75356	1.75356	160805	281982	-1.75356	160805	281982	-1.75356	-121177	-16.8868
132.0146@16.39	3	3	3.20864	7.10863	13.9384	15.4969	-2.94546	2.94546	15699.6	46242.5	-2.94546	15699.6	46242.5	-2.94546	-30542.9	-14.8986
1351.4445@0.916	3	3	0.379712	1.34439	16.7326	17.4171	-1.60718	1.60718	108897	175018	-1.60718	108897	175018	-1.60718	-66120.4	-16.0128
325.8877@16.477001	3	3	0.727567	2.30443	15.9296	16.626	-1.62048	1.62048	62412.8	101138	-1.62048	62412.8	101138	-1.62048	-38725.7	-15.241
634.2289@5.763	3	3	0.418173	2.04351	16.2112	16.7117	-1.41474	1.41474	75867	107332	-1.41474	75867	107332	-1.41474	-31464.7	-14.9414
630.0999@8.628999	3	3	2.0022	3.59133	16.5965	15.1793	2.67066	2.67066	99096.5	37105.6	2.67066	99096.5	37105.6	2.67066	61990.9	15.9198
710.0928@7.0569997	3	3	0.629308	0.695987	16.327	15.5126	1.75854	1.75854	82209.7	46748.8	1.75854	82209.7	46748.8	1.75854	35460.9	15.1139
1309.3083@0.9209999	3	3	0.525183	2.71542	16.0935	17.0325	-1.91716	1.91716	69923.3	134054	-1.91716	69923.3	134054	-1.91716	-64130.6	-15.9687
264.1084@3.6520002	3	3	0.525126	0.802628	16.6519	16.9331	-1.21515	1.21515	102974	125129	-1.21515	102974	125129	-1.21515	-22154.8	-14.4353
258.1573@4.8520007	3	3	0.45709	0.303983	16.455	16.6148	-1.11713	1.11713	89836.6	100359	-1.11713	89836.6	100359	-1.11713	-10522.9	-13.3612
2846.2356@0.93599993	3	3	1.0645	0.958531	16.8777	17.4363	-1.47287	1.47287	120415	177357	-1.47287	120415	177357	-1.47287	-56941.3	-15.7972
2112.607@6.7	3	3	1.04226	0.843719	19.061	18.6544	1.32562	1.32562	546941	412593	1.32562	546941	412593	1.32562	134348	17.0356
1640.5238@0.91300005	3	3	0.490108	1.03163	17.2329	17.5452	-1.24167	1.24167	154039	191267	-1.24167	154039	191267	-1.24167	-37227.3	-15.1841
2832.9482@0.915	3	3	0.139647	2.95992	16.9429	17.8011	-1.81275	1.81275	125986	228380	-1.81275	125986	228380	-1.81275	-102395	-16.6438
3190.1074@0.9209999	3	3	0.830003	0.987369	17.0964	17.4563	-1.28335	1.28335	140127	179832	-1.28335	140127	179832	-1.28335	-39704.6	-15.277
615.6466@1.264	3	3	0.427507	3.76459	16.541	17.2699	-1.65727	1.65727	95356.7	158031	-1.65727	95356.7	158031	-1.65727	-62674.7	-15.9356
271.1163@3.407	3	3	3.01368	0.745778	17.0299	16.3978	1.54985	1.54985	133818	86342.7	1.54985	133818	86342.7	1.54985	47475.5	15.5349
451.8515@16.507002	3	3	0.428797	4.73658	16.7534	18.0334	-2.42852	2.42852	110475	268291	-2.42852	110475	268291	-2.42852	-157816	-17.2679
2850.9104@0.91300005	3	3	0.788509	4.2916	16.2816	17.3988	-2.16915	2.16915	79663.1	172801	-2.16915	79663.1	172801	-2.16915	-93137.9	-16.5071
308.0788@5.9010005	3	3	0.637047	0.700135	14.703	15.32	-1.53367	1.53367	26671.1	40904.6	-1.53367	26671.1	40904.6	-1.53367	-14233.5	-13.797
2680.5989@0.92799985	3	3	0.560616	2.82916	16.5419	17.2007	-1.57879	1.57879	95413.3	150637	-1.57879	95413.3	150637	-1.57879	-55224	-15.753
505.2982@4.5849996	3	3	1.16364	3.32468	16.2251	16.8897	-1.58508	1.58508	76603	121422	-1.58508	76603	121422	-1.58508	-44818.6	-15.4518
1403.2946@0.9320001	3	3	0.161675	0.714816	17.4052	17.7729	-1.29034	1.29034	173571	223967	-1.29034	173571	223967	-1.29034	-50395.4	-15.621
1815.4875@4.153	3	3	0.683179	2.69732	16.1054	17.0861	-1.9734	1.9734	70504.7	139134	-1.9734	70504.7	139134	-1.9734	-68629	-16.0665
1998.64@3.031	3	3	0.587541	0.51706	17.2687	17.0508	1.16303	1.16303	157903	135768	1.16303	157903	135768	1.16303	22134.5	14.434
1548.5134@5.5190005	3	3	1.51628	1.62948	17.473	17.0025	1.38562	1.38562	181925	131295	1.38562	181925	131295	1.38562	50630	15.6277
1162.895@6.9840007	3	3	1.38357	1.10451	17.6109	17.2033	1.32644	1.32644	200174	150911	1.32644	200174	150911	1.32644	49262.8	15.5882
809.1247@6.5479994	3	3	3.33677	1.83149	17.0928	16.1476	1.92544	1.92544	139780	72596.2	1.92544	139780	72596.2	1.92544	67183.4	16.0358
798.1175@1.4309999	3	3	0.391082	1.34395	16.9737	17.2623	-1.22148	1.22148	128704	157209	-1.22148	128704	157209	-1.22148	-28505.4	-14.7989
1368.6198@0.93299997	3	3	0.358379	2.82662	16.1128	17.1269	-2.01963	2.01963	70865.3	143121	-2.01963	70865.3	143121	-2.01963	-72256.2	-16.1408
560.2414@1.705	3	3	1.04406	2.27778	16.5147	17.0505	-1.44974	1.44974	93633.1	135743	-1.44974	93633.1	135743	-1.44974	-42110.1	-15.3619
450.1562@6.6290007	3	3	0.862673	2.22308	16.3328	15.8537	1.39388	1.39388	82541.3	59217.1	1.39388	82541.3	59217.1	1.39388	23324.2	14.5095
266.0999@1.6169999	3	3	2.4512	0.46877	16.7186	16.1368	1.49665	1.49665	107843	72056	1.49665	107843	72056	1.49665	35786.5	15.1271
240.1259@6.187	3	3	2.36377	1.06059	15.1585	15.638	-1.39427	1.39427	36574	50994.1	-1.39427	36574	50994.1	-1.39427	-14420.1	-13.8158
859.4153@4.9329996	3	3	4.68762	7.76488	15.0462	16.9268	-3.68234	3.68234	33833.7	124587	-3.68234	33833.7	124587	-3.68234	-90753.3	-16.4697
2874.6382@0.92399985	3	3	0.542903	2.47046	16.8806	17.4837	-1.51891	1.51891	120664	183278	-1.51891	120664	183278	-1.51891	-62614.2	-15.9342
628.341@5.1090007	3	3	0.864063	0.909574	16.048	16.5738	-1.43976	1.43976	67753	97548.3	-1.43976	67753	97548.3	-1.43976	-29795.4	-14.8628
565.7458@16.442999	3	3	0.0732624	0.0681313	17.4291	17.5664	-1.0998	1.0998	176480	194092	-1.0998	176480	194092	-1.0998	-17611.9	-14.1043
362.9364@2.816	3	3	0.364227	0.506404	17.9208	17.6932	1.17081	1.17081	248132	211932	1.17081	248132	211932	1.17081	36200.1	15.1437
823.0867@7.259	3	3	0.873496	1.4433	16.2452	16.7586	-1.42744	1.42744	77675.9	110878	-1.42744	77675.9	110878	-1.42744	-33202.1	-15.019
516.2068@3.298	3	3	2.38714	4.12035	15.3792	16.8712	-2.81267	2.81267	42619.4	119874	-2.81267	42619.4	119874	-2.81267	-77255	-16.2373
1489.498@1.113	3	3	86.6546	1.47613	17.7416	8.80415	490.292	490.292	219163	447.005	490.292	219163	447.005	490.292	218716	17.7387
315.026@3.3810003	3	3	1.42167	1.72588	15.4257	16.2416	-1.76038	1.76038	44015.2	77483.5	-1.76038	44015.2	77483.5	-1.76038	-33468.3	-15.0305
337.7905@16.496	3	3	1.39263	1.08688	16.0757	16.5949	-1.43319	1.43319	69064.8	98982.8	-1.43319	69064.8	98982.8	-1.43319	-29918	-14.8687
327.1424@3.4629998	3	3	9.59972	9.87181	18.5236	15.2733	9.51586	9.51586	376843	39601.6	9.51586	376843	39601.6	9.51586	337242	18.3634
494.9095@5.974999	3	3	2.47342	3.25049	16.205	14.8287	2.5959	2.5959	75540.4	29099.8	2.5959	75540.4	29099.8	2.5959	46440.5	15.5031
1539.5844@4.485	3	3	0.966913	7.5272	15.5724	16.9632	-2.62227	2.62227	48724.7	127769	-2.62227	48724.7	127769	-2.62227	-79044.7	-16.2704
1813.5337@6.4650006	3	3	1.00556	1.01773	17.7541	17.2994	1.37053	1.37053	221070	161303	1.37053	221070	161303	1.37053	59767	15.8671
421.8167@16.528997	3	3	0.495653	0.657128	18.5309	18.9678	-1.35369	1.35369	378752	512712	-1.35369	378752	512712	-1.35369	-133960	-17.0314
1365.6674@0.93599993	3	3	0.180926	1.29891	16.3395	16.931	-1.50681	1.50681	82924.3	124951	-1.50681	82924.3	124951	-1.50681	-42027	-15.359
661.2215@3.1440003	3	3	6.68295	173.205	5.14905	15.937	-1768.09	1768.09	35.4828	62737	-1768.09	35.4828	62737	-1768.09	-62701.5	-15.9362
1536.7179@0.923	3	3	0.633452	0.902964	17.2651	17.8383	-1.48781	1.48781	157516	234354	-1.48781	157516	234354	-1.48781	-76837.8	-16.2295
904.2916@3.5429995	3	3	0.64305	1.59417	17.0915	16.6819	1.3283	1.3283	139657	105140	1.3283	139657	105140	1.3283	34517.8	15.0751
272.1348@4.861	3	3	7.70852	1.67865	19.8348	17.0853	6.72471	6.72471	935110	139056	6.72471	935110	139056	6.72471	796054	19.6025
1192.3141@1.2489998	3	3	0.772707	1.83091	16.9828	17.4877	-1.41905	1.41905	129516	183789	-1.41905	129516	183789	-1.41905	-54273.1	-15.728
304.1061@4.6139994	3	3	173.205	4.12115	15.7173	4.904	1799.45	1799.45	53875.4	29.9399	1799.45	53875.4	29.9399	1799.45	53845.4	15.7165
232.0731@4.8629994	3	3	1.0989	2.331	16.0728	15.1005	1.96203	1.96203	68930.1	35132.1	1.96203	68930.1	35132.1	1.96203	33798	15.0447
1277.102@0.92399985	3	3	1.18309	3.83607	16.423	17.3683	-1.92564	1.92564	87862.5	169192	-1.92564	87862.5	169192	-1.92564	-81329.2	-16.3115
1395.9075@0.9099999	3	3	0.213242	1.33599	17.0171	17.611	-1.50933	1.50933	132632	200186	-1.50933	132632	200186	-1.50933	-67553.9	-16.0437
381.1518@4.028	3	3	1.61387	173.205	5.37572	16.3263	-1979.03	1979.03	41.5195	82168.3	-1979.03	41.5195	82168.3	-1979.03	-82126.8	-16.3256
961.315@1.2110001	3	3	9.53316	1.84135	14.7281	12.9701	3.38235	3.38235	27139.5	8023.86	3.38235	27139.5	8023.86	3.38235	19115.6	14.2225
547.1416@4.2820005	3	3	1.84063	1.80081	14.9884	15.8057	-1.76211	1.76211	32506.1	57279.4	-1.76211	32506.1	57279.4	-1.76211	-24773.3	-14.5965
352.0784@4.9270005	3	3	4.68679	4.36843	16.0361	14.0929	3.8456	3.8456	67198.4	17474.1	3.8456	67198.4	17474.1	3.8456	49724.3	15.6017
1008.6327@4.9609995	3	3	1.37808	2.76518	17.0918	17.7169	-1.54231	1.54231	139684	215436	-1.54231	139684	215436	-1.54231	-75752.2	-16.209
534.2171@3.3849998	3	3	1.64972	0.978382	17.0313	15.7653	2.405	2.405	133948	55695.6	2.405	133948	55695.6	2.405	78252	16.2558
1031.331@3.5400007	3	3	3.35253	1.87189	17.567	16.8008	1.70077	1.70077	194180	114172	1.70077	194180	114172	1.70077	80007.9	16.2879
1287.6492@4.5100007	3	3	2.00019	5.4595	15.6498	16.7197	-2.09922	2.09922	51412.3	107926	-2.09922	51412.3	107926	-2.09922	-56513.5	-15.7863
934.4254@4.9199996	3	3	3.22397	5.09719	14.5328	15.8213	-2.44284	2.44284	23702.6	57901.8	-2.44284	23702.6	57901.8	-2.44284	-34199.2	-15.0617
124.0887@5.7809997	3	3	1.27613	2.06796	16.0107	16.8049	-1.73408	1.73408	66024.1	114491	-1.73408	66024.1	114491	-1.73408	-48467.1	-15.5647
1589.529@0.96599996	3	3	0.241668	1.37864	17.4315	17.7486	-1.24588	1.24588	176764	220227	-1.24588	176764	220227	-1.24588	-43462.7	-15.4075
1153.4382@7.819	3	3	1.30845	5.08882	16.8076	18.3001	-2.81384	2.81384	114704	322760	-2.81384	114704	322760	-2.81384	-208055	-17.6666
165.9349@0.99600005	3	3	3.07308	0.398455	15.2397	15.8858	-1.56488	1.56488	38692	60548.4	-1.56488	38692	60548.4	-1.56488	-21856.5	-14.4158
287.1471@3.5330007	3	3	3.34489	3.01572	14.9867	15.8492	-1.81821	1.81821	32466.6	59031.3	-1.81821	32466.6	59031.3	-1.81821	-26564.7	-14.6972
2711.7666@0.9169999	3	3	0.536368	1.63642	17.4711	17.9162	-1.36136	1.36136	181690	247346	-1.36136	181690	247346	-1.36136	-65656.3	-16.0026
707.1868@2.9559999	3	3	5.04284	0.977715	15.9725	17.3241	-2.55187	2.55187	64299.3	164084	-2.55187	64299.3	164084	-2.55187	-99784.3	-16.6065
156.0575@1.6210002	3	3	0.849556	1.16343	16.2835	16.7285	-1.36135	1.36135	79765.8	108590	-1.36135	79765.8	108590	-1.36135	-28823.7	-14.815
875.5476@4.8930006	3	3	0.106986	0.256307	16.9945	17.1989	-1.15219	1.15219	130572	150443	-1.15219	130572	150443	-1.15219	-19871.3	-14.2784
218.0247@1.1049999	3	3	0.224378	1.13503	16.56	15.8832	1.59858	1.59858	96615.9	60438.4	1.59858	96615.9	60438.4	1.59858	36177.4	15.1428
738.2775@3.3320005	3	3	0.0672334	1.51598	16.3175	16.6695	-1.27633	1.27633	81669.3	104237	-1.27633	81669.3	104237	-1.27633	-22567.7	-14.462
2260.1157@5.8369994	3	3	1.04733	8.23502	15.1513	17.1325	-3.94831	3.94831	36391	143683	-3.94831	36391	143683	-3.94831	-107292	-16.7112
3325.6978@0.9429999	3	3	0.956166	2.98022	16.4922	17.2439	-1.68383	1.68383	92179.4	155215	-1.68383	92179.4	155215	-1.68383	-63035.1	-15.9439
325.8976@16.438997	3	3	0.634565	4.88166	15.7009	16.6222	-1.89384	1.89384	53263.2	100872	-1.89384	53263.2	100872	-1.89384	-47609	-15.5389
350.1679@1.6070002	3	3	0.360064	1.00415	15.6542	16.1527	-1.41276	1.41276	51566.7	72851.2	-1.41276	51566.7	72851.2	-1.41276	-21284.5	-14.3775
479.1761@1.714	3	3	1.72539	1.69821	17.3939	16.6608	1.66219	1.66219	172219	103610	1.66219	172219	103610	1.66219	68609.1	16.0661
698.0444@16.356998	3	3	5.65181	1.85265	15.8014	17.5801	-3.43118	3.43118	57107.7	195946	-3.43118	57107.7	195946	-3.43118	-138839	-17.0831
541.0484@1.587	3	3	5.6909	0.933047	18.5621	17.1561	2.65004	2.65004	387045	146053	2.65004	387045	146053	2.65004	240992	17.8786
1013.4773@5.903	3	3	3.95068	2.72303	16.3713	15.3795	1.98858	1.98858	84770.6	42628.6	1.98858	84770.6	42628.6	1.98858	42142	15.363
476.2106@3.907	3	3	173.205	5.71	16.4682	5.42652	2108.01	2108.01	90660.3	43.0076	2108.01	90660.3	43.0076	2108.01	90617.3	16.4675
1632.923@0.9320001	3	3	0.631427	2.15463	16.7994	17.2533	-1.36971	1.36971	114060	156229	-1.36971	114060	156229	-1.36971	-42168.8	-15.3639
242.0937@5.257	3	3	2.47234	1.84236	16.2672	15.5901	1.59884	1.59884	78867.9	49328.4	1.59884	78867.9	49328.4	1.59884	29539.5	14.8504
428.2434@4.841	3	3	4.46465	173.205	5.01401	15.8382	-1812.96	1812.96	32.3124	58581.2	-1812.96	32.3124	58581.2	-1812.96	-58548.9	-15.8374
1044.5581@4.52	3	3	0.238575	2.98136	15.9897	16.6947	-1.63013	1.63013	65069.2	106071	-1.63013	65069.2	106071	-1.63013	-41002	-15.3234
406.2303@4.132	3	3	2.96246	1.56646	18.5013	17.7913	1.63573	1.63573	371052	226842	1.63573	371052	226842	1.63573	144209	17.1378
665.8012@4.4560003	3	3	1.6757	2.52401	15.9786	16.6211	-1.5611	1.5611	64569.5	100800	-1.5611	64569.5	100800	-1.5611	-36230.3	-15.1449
871.4265@4.2740006	3	3	0.973056	4.18455	16.1701	17.0644	-1.85871	1.85871	73735.6	137053	-1.85871	73735.6	137053	-1.85871	-63317.4	-15.9503
3233.4631@0.91300005	3	3	0.228075	1.88441	17.6488	18.181	-1.4461	1.4461	205508	297185	-1.4461	205508	297185	-1.4461	-91677	-16.4843
1106.247@3.298	3	3	0.486953	1.23487	16.6621	17.1399	-1.39262	1.39262	103700	144414	-1.39262	103700	144414	-1.39262	-40714.4	-15.3133
421.2161@4.381	3	3	86.657		0	11.7458	-3434.34	3434.34	1	3434.34	-3434.34	1	3434.34	-3434.34	-3433.34	-11.7454
452.1539@3.9729998	3	3		86.6595	11.1951	0	2344.57	2344.57	2344.57	1	2344.57	2344.57	1	2344.57	2343.57	11.1945
1661.487@3.115	3	3	1.30094	3.8952	15.9487	16.6834	-1.66401	1.66401	63247.5	105244	-1.66401	63247.5	105244	-1.66401	-41996.7	-15.358
2712.1997@0.923	3	3	0.906236	1.31842	17.1543	17.6467	-1.40679	1.40679	145864	205201	-1.40679	145864	205201	-1.40679	-59336.5	-15.8566
3084.2715@0.923	3	3	0.269379	1.12522	17.1169	17.7173	-1.51615	1.51615	142135	215498	-1.51615	142135	215498	-1.51615	-73363	-16.1628
1161.4492@4.9679995	3	3	0.7232	0.922006	18.0391	17.755	1.21767	1.21767	269344	221196	1.21767	269344	221196	1.21767	48147.9	15.5552
817.2699@1.611	3	3	1.13546	0.854716	15.9808	16.3486	-1.29042	1.29042	64668.5	83449.6	-1.29042	64668.5	83449.6	-1.29042	-18781.1	-14.197
1446.5024@0.93299997	3	3	0.655502	1.55573	17.5696	17.9379	-1.29088	1.29088	194524	251107	-1.29088	194524	251107	-1.29088	-56583.7	-15.7881
3124.6892@0.92799985	3	3	0.794958	2.23756	16.8175	17.5956	-1.71491	1.71491	115495	198063	-1.71491	115495	198063	-1.71491	-82568	-16.3333
551.2688@3.7389998	3	3	1.3401	1.28636	18.8816	19.3626	-1.39575	1.39575	482969	674106	-1.39575	482969	674106	-1.39575	-191137	-17.5442
2720.1736@0.934	3	3	0.406181	0.799573	17.0138	17.6037	-1.50521	1.50521	132328	199182	-1.50521	132328	199182	-1.50521	-66854.1	-16.0287
834.1586@1.554	3	3	0.45103	3.91119	16.9893	17.7403	-1.68303	1.68303	130101	218964	-1.68303	130101	218964	-1.68303	-88862.7	-16.4393
1312.3115@1.007	3	3	2.28182	1.39431	16.0038	15.2586	1.67627	1.67627	65710.5	39200.4	1.67627	65710.5	39200.4	1.67627	26510.1	14.6943
365.0865@5.456001	3	3	0.718293	0.221301	21.4616	21.2257	1.17765	1.17765	2.88796e+06	2452310	1.17765	2.88796e+06	2452310	1.17765	435648	18.7328
2730.5706@0.92799985	3	3	0.104959	0.925948	16.7057	17.1084	-1.32194	1.32194	106886	141297	-1.32194	106886	141297	-1.32194	-34411	-15.0706
675.1216@7.366	3	3	0.398463	2.45869	16.7933	15.4348	2.56415	2.56415	113575	44293.6	2.56415	113575	44293.6	2.56415	69281.8	16.0802
1029.4467@4.076	3	3	2.82657	4.47018	18.5228	17.1032	2.67507	2.67507	376638	140796	2.67507	376638	140796	2.67507	235842	17.8475
2639.6104@0.92399985	3	3	0.949345	2.41489	15.9768	16.8598	-1.84421	1.84421	64492.5	118938	-1.84421	64492.5	118938	-1.84421	-54445.3	-15.7325
1992.4908@5.0309997	3	3	3.24697	1.86892	16.0745	14.9364	2.20086	2.20086	69008.5	31355.3	2.20086	69008.5	31355.3	2.20086	37653.2	15.2005
996.5752@4.9910007	3	3	1.93074	2.05729	16.6086	16.0569	1.46582	1.46582	99931	68173.9	1.46582	99931	68173.9	1.46582	31757.1	14.9548
745.7178@3.6409998	3	3	0.881867	3.86619	16.2515	17.1891	-1.91531	1.91531	78016.8	149427	-1.91531	78016.8	149427	-1.91531	-71409.8	-16.1238
465.7866@16.445002	3	3	0.551051	0.0825629	17.0059	17.2459	-1.18104	1.18104	131606	155432	-1.18104	131606	155432	-1.18104	-23825.9	-14.5402
380.1061@5.104	3	3	1.09496	1.24014	16.0015	16.5005	-1.41321	1.41321	65606.3	92715.6	-1.41321	65606.3	92715.6	-1.41321	-27109.3	-14.7265
625.3213@6.0950007	3	3	2.1843	2.22508	14.7244	16.3244	-3.03128	3.03128	27070.6	82058.4	-3.03128	27070.6	82058.4	-3.03128	-54987.8	-15.7468
329.8871@16.485998	3	3	0.841106	0.493798	16.6276	17.0017	-1.29602	1.29602	101251	131224	-1.29602	101251	131224	-1.29602	-29972.7	-14.8714
1584.4272@3.8870008	3	3	1.43784	2.60317	15.748	16.8054	-2.08127	2.08127	55031.9	114537	-2.08127	55031.9	114537	-2.08127	-59504.6	-15.8607
910.4178@8.469001	3	3	0.837211	1.34782	17.7497	18.5613	-1.75521	1.75521	220388	386826	-1.75521	220388	386826	-1.75521	-166438	-17.3446
818.2979@1.7159997	3	3	0.116397	1.80602	17.1917	17.6382	-1.36274	1.36274	149700	204002	-1.36274	149700	204002	-1.36274	-54302.1	-15.7287
318.1324@5.567001	3	3	1.09867	0.701728	16.2273	16.5879	-1.284	1.284	76718.2	98505.9	-1.284	76718.2	98505.9	-1.284	-21787.7	-14.4112
810.1549@0.955	3	3	0.42715	1.93282	16.6047	17.2663	-1.58186	1.58186	99659.7	157647	-1.58186	99659.7	157647	-1.58186	-57987.7	-15.8235
1247.4194@3.632	3	3	1.23914	1.0077	17.1934	17.5821	-1.30922	1.30922	149876	196220	-1.30922	149876	196220	-1.30922	-46344	-15.5001
696.132@6.2430005	3	3	1.20073	3.45653	16.3117	14.8052	2.84118	2.84118	81342.8	28630	2.84118	81342.8	28630	2.84118	52712.8	15.6859
1031.4827@5.013	3	3	1.85581	2.04315	15.4774	16.6324	-2.22697	2.22697	45619.7	101593	-2.22697	45619.7	101593	-2.22697	-55973.8	-15.7725
228.0537@1.073	3	3	3.30245	3.10623	15.5274	14.7322	1.73528	1.73528	47229.8	27217.4	1.73528	47229.8	27217.4	1.73528	20012.4	14.2886
1728.5667@4.0250006	3	3	0.571655	7.06912	15.4642	16.9863	-2.87195	2.87195	45206.3	129830	-2.87195	45206.3	129830	-2.87195	-84623.8	-16.3688
1521.3359@0.922	3	3	0.905764	2.01097	16.9647	17.5941	-1.54696	1.54696	127905	197864	-1.54696	127905	197864	-1.54696	-69958.9	-16.0942
1314.4883@7.668999	3	3	0.476457	1.04913	17.2172	17.9214	-1.62924	1.62924	152371	248249	-1.62924	152371	248249	-1.62924	-95878.3	-16.5489
2843.2666@0.91300005	3	3	0.305509	1.69512	17.305	17.9067	-1.51756	1.51756	161924	245730	-1.51756	161924	245730	-1.51756	-83805.9	-16.3548
1557.7372@5.4319997	3	3	1.07334	6.69807	15.2554	17.1209	-3.644	3.644	39113.8	142531	-3.644	39113.8	142531	-3.644	-103417	-16.6581
3318.7334@0.93299997	3	3	0.709935	2.55662	16.1296	17.196	-2.09419	2.09419	71696.6	150146	-2.09418	71696.6	150146	-2.09418	-78449.4	-16.2595
438.2066@4.445	3	3	0.858819	10.8273	15.5256	18.3972	-7.31893	7.31893	47170.8	345239	-7.31893	47170.8	345239	-7.31893	-298069	-18.1853
249.0638@3.771	3	3	0.802171	1.18165	15.2342	16.3594	-2.18128	2.18128	38543.3	84073.8	-2.18128	38543.3	84073.8	-2.18128	-45530.6	-15.4745
809.2756@1.7029998	3	3	0.748246	0.414287	18.1703	17.6135	1.471	1.471	294980	200530	1.471	294980	200530	1.471	94450.2	16.5273
467.0089@10.514	3	3	1.70689	0.336204	16.7233	16.2051	1.43216	1.43216	108200	75550	1.43216	108200	75550	1.43216	32649.8	14.9948
3032.0813@4.9700003	3	3	4.0185	3.17473	16.5674	15.5796	1.98316	1.98316	97114.6	48969.6	1.98316	97114.6	48969.6	1.98316	48145	15.5551
1573.9382@0.9209999	3	3	0.532996	2.3182	16.606	17.5919	-1.98054	1.98054	99747.1	197553	-1.98054	99747.1	197553	-1.98054	-97805.7	-16.5776
353.074@3.6259997	3	3	173.205	13.0056	15.1868	4.74881	1387.24	1387.24	37298.2	26.8866	1387.24	37298.2	26.8866	1387.24	37271.4	15.1858
520.2557@3.4799998	3	3	2.23533	2.75376	15.2758	16.0415	-1.70022	1.70022	39671.5	67450.4	-1.70022	39671.5	67450.4	-1.70022	-27778.9	-14.7617
186.0636@3.229	3	3	1.79739	0.536839	16.9835	16.5897	1.31383	1.31383	129578	98626.6	1.31383	129578	98626.6	1.31383	30951.8	14.9177
1226.501@4.242	3	3	3.73895	6.61368	17.2435	15.2187	4.06928	4.06928	155171	38132.3	4.06928	155171	38132.3	4.06928	117039	16.8366
563.2049@3.8650002	3	3	1.5662	1.25582	18.2727	17.7751	1.41193	1.41193	316699	224302	1.41193	316699	224302	1.41193	92397.1	16.4956
908.2065@0.915	3	3	1.99999	3.70595	15.7309	16.548	-1.76184	1.76184	54384.6	95816.8	-1.76184	54384.6	95816.8	-1.76184	-41432.2	-15.3385
370.0657@5.451	3	3	1.51115	0.215103	16.8657	16.3954	1.3854	1.3854	119419	86198.3	1.3854	119419	86198.3	1.3854	33220.7	15.0198
2020.8788@5.09	3	3	0.912122	1.5818	16.4067	16.7993	-1.31267	1.31267	86880.6	114046	-1.31267	86880.6	114046	-1.31267	-27165.1	-14.7295
362.1395@9.026	3	3	0.871171	0.788944	17.0475	16.7407	1.23696	1.23696	135459	109510	1.23696	135459	109510	1.23696	25948.9	14.6634
581.1858@4.6360006	3	3	2.19342	1.08079	15.7973	16.2816	-1.39887	1.39887	56945.6	79659.6	-1.39887	56945.6	79659.6	-1.39887	-22714	-14.4713
3055.0356@0.922	3	3	0.834956	1.21137	16.8985	17.295	-1.31634	1.31634	122169	160815	-1.31634	122169	160815	-1.31634	-38646.8	-15.2381
908.242@1.231	3	3	2.39096	1.47771	18.5022	17.3726	2.18812	2.18812	371305	169691	2.18812	371305	169691	2.18812	201614	17.6212
630.248@3.407	3	3	5.8853		0	16.4073	-86913.2	86913.2	1	86913.2	-86913.2	1	86913.2	-86913.2	-86912.2	-16.4073
301.1058@4.346	3	3	0.273004	4.83659	17.3478	16.3123	2.04985	2.04985	166810	81376.8	2.04985	166810	81376.8	2.04985	85433.5	16.3825
748.348@3.6749995	3	3	1.26676	0.192681	15.8812	17.0419	-2.23562	2.23562	60356.9	134935	-2.23562	60356.9	134935	-2.23562	-74578.2	-16.1865
1426.5792@0.934	3	3	0.959411	2.94241	16.9519	17.578	-1.54334	1.54334	126774	195655	-1.54334	126774	195655	-1.54334	-68881.1	-16.0718
306.0719@4.862	3	3	1.5802	2.34943	15.9189	15.0933	1.77216	1.77216	61951.6	34958.2	1.77216	61951.6	34958.2	1.77216	26993.4	14.7203
339.1246@1.1049999	3	3	0.57902	1.86981	16.7466	15.6173	2.18763	2.18763	109960	50264.5	2.18763	109960	50264.5	2.18763	59695.6	15.8653
590.1438@3.4710004	3	3	1.01837	1.11806	16.4576	16.834	-1.29808	1.29808	89996.4	116823	-1.29808	89996.4	116823	-1.29808	-26826.1	-14.7114
1629.9401@0.94499993	3	3	0.223105	1.86068	17.376	18.0326	-1.57628	1.57628	170102	268128	-1.57628	170102	268128	-1.57628	-98026.5	-16.5809
195.0531@4.272	3	3	0.757034	0.37188	16.7066	16.4326	1.20914	1.20914	106948	88450.1	1.20913	106948	88450.1	1.20913	18498	14.1751
418.2252@5.7190003	3	3	0.517497	0.293871	16.6503	16.8215	-1.12602	1.12602	102857	115819	-1.12602	102857	115819	-1.12602	-12962.3	-13.662
1412.7261@0.922	3	3	1.01413	1.48175	16.0182	16.686	-1.58871	1.58871	66367.1	105438	-1.58871	66367.1	105438	-1.58871	-39071	-15.2538
676.069@6.88	3	3	3.7633	2.1342	15.8951	13.8288	4.18808	4.18808	60939.4	14550.7	4.18808	60939.4	14550.7	4.18808	46388.7	15.5015
462.1958@4.1160007	3	3	2.02079	3.18306	18.0005	17.2589	1.67205	1.67205	262232	156832	1.67205	262232	156832	1.67205	105400	16.6855
240.0786@6.1149993	3	3	1.61747	2.31992	16.2307	14.7527	2.78558	2.78558	76897.9	27605.7	2.78558	76897.9	27605.7	2.78558	49292.2	15.5891
664.306@4.7309995	3	3	1.13081	2.5621	15.9725	16.5714	-1.51458	1.51458	64297.2	97383.5	-1.51458	64297.2	97383.5	-1.51458	-33086.3	-15.0139
1440.3016@0.934	3	3	0.0263533	1.78369	17.2085	17.6441	-1.35244	1.35244	151453	204831	-1.35244	151453	204831	-1.35244	-53378.5	-15.704
1142.208@0.9969998	3	3	0.484146	0.604705	16.7068	17.22	-1.42725	1.42725	106964	152665	-1.42725	106964	152665	-1.42725	-45700.7	-15.4799
455.9997@16.377	3	3	7.43738	173.205	4.95802	14.9335	-1006.72	1006.72	31.0823	31291.1	-1006.72	31.0823	31291.1	-1006.72	-31260	-14.932
584.2957@8.801001	3	3	1.16701	4.38483	14.0517	18.5725	-22.9567	22.9567	16981.7	389845	-22.9567	16981.7	389845	-22.9567	-372864	-18.5083
2554.196@0.93599993	3	3	0.770746	2.00095	16.5156	17.5249	-2.01301	2.01301	93688.7	188596	-2.01301	93688.7	188596	-2.01301	-94907.2	-16.5342
620.7403@3.5309997	3	3	1.39161	1.01399	16.0546	15.71	1.2698	1.2698	68066	53603.6	1.2698	68066	53603.6	1.2698	14462.4	13.82
1434.7902@0.934	3	3	0.460336	4.79725	15.9343	17.0849	-2.22004	2.22004	62620	139019	-2.22004	62620	139019	-2.22004	-76398.8	-16.2213
276.0563@5.3009996	3	3	0.329032	1.16774	16.1786	16.5871	-1.32735	1.32735	74172.3	98452.8	-1.32735	74172.3	98452.8	-1.32735	-24280.5	-14.5675
3074.2678@0.9209999	3	3	0.81081	0.756751	17.5226	18.0207	-1.41237	1.41237	188291	265936	-1.41237	188291	265936	-1.41237	-77644.9	-16.2446
661.2549@1.705	3	3	1.47336	0.587251	17.3723	17.8008	-1.34585	1.34585	169657	228334	-1.34585	169657	228334	-1.34585	-58676.6	-15.8405
717.4836@0.9639998	3	3	0.513222	0.23727	15.9787	16.5654	-1.50179	1.50179	64574.2	96976.8	-1.50179	64574.2	96976.8	-1.50179	-32402.6	-14.9838
2771.2725@0.91800016	3	3	1.01171	4.74708	15.8084	17.4098	-3.03448	3.03448	57385.2	174134	-3.03448	57385.2	174134	-3.03448	-116749	-16.8331
848.3394@3.3659997	3	3	0.272756	1.35925	17.4954	17.8252	-1.25684	1.25684	184771	232227	-1.25684	184771	232227	-1.25684	-47456.6	-15.5343
1307.2947@0.9320001	3	3	0.469997	1.42976	17.9636	18.4583	-1.40899	1.40899	255619	360164	-1.40899	255619	360164	-1.40899	-104545	-16.6738
792.2549@3.0799997	3	3	1.93894	2.23953	17.1075	16.5178	1.50495	1.50495	141210	93830.3	1.50495	141210	93830.3	1.50495	47379.7	15.532
2720.0784@0.93799996	3	3	1.2	2.68128	15.8747	16.7871	-1.88215	1.88215	60085.8	113090	-1.88215	60085.8	113090	-1.88215	-53004.5	-15.6938
242.2243@13.241999	3	3	8.52816	2.27212	14.034	15.6031	-2.96718	2.96718	16775.1	49774.7	-2.96718	16775.1	49774.7	-2.96718	-32999.6	-15.0102
536.1349@3.0429995	3	3	0.423146	6.1783	16.1023	17.3175	-2.32168	2.32168	70352.8	163336	-2.32168	70352.8	163336	-2.32168	-92983.7	-16.5047
1501.746@0.922	3	3	2.02965	2.47987	16.1531	16.7935	-1.55871	1.55871	72874.5	113590	-1.55871	72874.5	113590	-1.55871	-40715.4	-15.3133
1724.6493@4.5569997	3	3	1.55438	1.10134	17.1217	16.2723	1.80166	1.80166	142605	79152	1.80166	142605	79152	1.80166	63453.1	15.9534
236.0795@2.9559999	3	3	0.216916	5.25357	16.7612	18.2922	-2.88974	2.88974	111080	320994	-2.88974	111080	320994	-2.88974	-209913	-17.6794
1543.5059@0.9110002	3	3	0.319694	1.22417	18.133	18.6109	-1.39275	1.39275	287460	400361	-1.39275	287460	400361	-1.39275	-112901	-16.7847
1095.3978@4.089	3	3	0.522504	1.63374	16.5016	16.1402	1.28464	1.28464	92784.4	72225.9	1.28464	92784.4	72225.9	1.28464	20558.5	14.3274
1350.2838@0.91300005	3	3	0.340269	1.58229	17.5677	18.2009	-1.55098	1.55098	194274	301316	-1.55098	194274	301316	-1.55098	-107042	-16.7078
2840.2925@0.927	3	3	1.07511	3.28494	16.1713	17.1662	-1.99297	1.99297	73796	147073	-1.99297	73796	147073	-1.99297	-73277.1	-16.1611
1175.5537@4.8520007	3	3	1.87505	173.205	5.19626	15.1088	-963.758	963.758	36.6631	35334.4	-963.758	36.6631	35334.4	-963.758	-35297.7	-15.1073
2677.7952@0.922	3	3	1.0437	2.26362	16.0497	16.859	-1.75235	1.75235	67834.6	118870	-1.75235	67834.6	118870	-1.75235	-51035.3	-15.6392
627.3217@3.8530004	3	3	5.30381	1.28054	16.1372	17.2995	-2.23808	2.23808	72074.9	161309	-2.23808	72074.9	161309	-2.23808	-89234.3	-16.4453
1547.099@0.927	3	3	0.312596	0.392448	17.6914	18.2129	-1.43551	1.43551	211658	303837	-1.43551	211658	303837	-1.43551	-92178.8	-16.4921
663.1178@5.61	3	3	3.03339	1.86972	16.4702	15.352	2.17084	2.17084	90787.9	41821.5	2.17084	90787.9	41821.5	2.17084	48966.5	15.5795
733.2642@3.9830003	3	3	1.16488	2.45835	17.6077	18.3751	-1.70228	1.70228	199727	339991	-1.70228	199727	339991	-1.70228	-140264	-17.0978
663.6892@16.427998	3	3	1.06846	0.455275	17.1246	17.4599	-1.26157	1.26157	142899	180277	-1.26157	142899	180277	-1.26157	-37377.5	-15.1899
312.0992@5.3079996	3	3	0.777222	0.662876	16.226	15.7026	1.43735	1.43735	76650.5	53327.6	1.43735	76650.5	53327.6	1.43735	23322.9	14.5095
206.0797@3.3829997	3	3	13.1002	173.205	4.50593	14.3064	-891.725	891.725	22.7206	20260.6	-891.725	22.7206	20260.6	-891.725	-20237.8	-14.3048
318.2036@4.5400004	3	3	1.05868	1.5143	15.8717	15.4716	1.31958	1.31958	59959.4	45438.3	1.31958	59959.4	45438.3	1.31958	14521.1	13.8259
2974.3345@0.9169999	3	3	1.02506	2.89785	17.3932	18.1365	-1.674	1.674	172135	288154	-1.674	172135	288154	-1.674	-116019	-16.824
226.0664@1.1029999	3	3	1.12519	0.713929	16.5153	16.1459	1.29181	1.29181	93671.4	72512.1	1.29181	93671.4	72512.1	1.29181	21159.4	14.369
546.2263@3.2649996	3	3	1.09516	0.632735	15.6086	16.2801	-1.59273	1.59273	49964.7	79580.2	-1.59273	49964.7	79580.2	-1.59273	-29615.6	-14.8541
588.131@3.1590002	3	3	173.205	5.1659	14.7826	4.96288	903.706	903.706	28184.1	31.1872	903.706	28184.1	31.1872	903.706	28152.9	14.781
407.1911@1.009	3	3	1.9006	1.76699	15.8088	15.21	1.51438	1.51438	57399.6	37903.2	1.51438	57399.6	37903.2	1.51438	19496.5	14.2509
762.3136@3.8930001	3	3	10.1007	5.2621	17.1987	14.8475	5.1026	5.1026	150427	29480.4	5.1026	150427	29480.4	5.1026	120946	16.884
269.0401@3.44	3	3	3.26102	173.205	4.84776	14.7192	-936.666	936.666	28.7952	26971.5	-936.667	28.7952	26971.5	-936.667	-26942.7	-14.7176
1915.9419@5.7659993	3	3	0.933838	3.26371	15.5428	16.481	-1.91623	1.91623	47734.7	91470.6	-1.91623	47734.7	91470.6	-1.91623	-43735.8	-15.4165
2061.9353@5.9270005	3	3	2.46574	3.8953	16.464	15.4193	2.06292	2.06292	90397.1	43819.9	2.06292	90397.1	43819.9	2.06292	46577.2	15.5073
859.2451@1.215	3	3	0.849156	1.53974	15.7548	16.4526	-1.62205	1.62205	55293.2	89688.1	-1.62205	55293.2	89688.1	-1.62205	-34395	-15.0699
502.3465@3.4529994	3	3	2.31722	1.80129	15.2978	16.3087	-2.01512	2.01512	40281.1	81171.2	-2.01512	40281.1	81171.2	-2.01512	-40890.1	-15.3195
1134.565@4.7669997	3	3	1.62088	173.205	5.28244	15.5739	-1253.21	1253.21	38.9201	48775.1	-1253.21	38.9201	48775.1	-1253.21	-48736.2	-15.5727
338.8502@16.434002	3	3	0.940621	0.972497	16.4945	16.7877	-1.22534	1.22534	92329.2	113135	-1.22534	92329.2	113135	-1.22534	-20805.6	-14.3447
1396.5892@7.6880007	3	3	0.606985	5.20307	15.1299	16.4904	-2.56769	2.56769	35855.8	92066.6	-2.56769	35855.8	92066.6	-2.56769	-56210.8	-15.7786
469.824@16.496	3	3	0.639655	1.2473	16.3096	17.1058	-1.73644	1.73644	81224.2	141041	-1.73644	81224.2	141041	-1.73644	-59816.4	-15.8683
448.1803@1.7349999	3	3	173.205	5.93515	14.602	4.92168	820.467	820.467	24867.6	30.309	820.467	24867.6	30.309	820.467	24837.3	14.6002
1360.0675@0.9320001	3	3	0.367981	1.05126	17.0843	17.6907	-1.52255	1.52255	138954	211564	-1.52255	138954	211564	-1.52255	-72610.2	-16.1479
1644.3264@0.93700004	3	3	0.530084	1.16439	17.5839	17.8685	-1.21809	1.21809	196459	239304	-1.21809	196459	239304	-1.21809	-42845.1	-15.3868
196.1155@6.2990003	3	3	0.210067	0.267464	25.3609	25.5691	-1.15521	1.15521	43092836	49781196	-1.15521	43092836	49781196	-1.15521	-6688360	-22.6732
264.095@3.6090002	3	3	14.1882	173.205	4.4179	13.0692	-402.074	402.074	21.3757	8594.62	-402.074	21.3757	8594.62	-402.074	-8573.25	-13.0656
480.1831@4.4770007	3	3	86.7115		0	10.3716	-1324.85	1324.85	1	1324.85	-1324.85	1	1324.85	-1324.85	-1323.85	-10.3705
2630.6091@0.9169999	3	3	0.754563	3.32467	16.4113	17.3729	-1.94756	1.94756	87154	169738	-1.94756	87154	169738	-1.94756	-82583.9	-16.3336
1007.683@4.882	3	3	0.133208	0.656106	17.6025	17.3744	1.17128	1.17128	199008	169907	1.17128	199008	169907	1.17128	29100.9	14.8288
674.3647@11.492999	3	3	1.15292	1.15859	16.5527	17.0314	-1.39349	1.39349	96130.9	133958	-1.39349	96130.9	133958	-1.39349	-37826.7	-15.2071
470.2366@5.536999	3	3	1.96365	6.5921	15.7685	14.0651	3.25662	3.25662	55819.7	17140.4	3.25662	55819.7	17140.4	3.25662	38679.3	15.2393
307.1101@3.41	3	3	173.205	2.80564	15.5753	5.13039	1393.88	1393.88	48823.5	35.0269	1393.88	48823.5	35.0269	1393.88	48788.4	15.5743
2901.3215@5.1279993	3	3	1.07875	2.84585	15.9896	17.1205	-2.19003	2.19003	65064.8	142494	-2.19003	65064.8	142494	-2.19003	-77428.9	-16.2406
247.073@1.6270001	3	3	0.62527	1.14212	16.4647	16.1108	1.27793	1.27793	90438.8	70769.7	1.27793	90438.8	70769.7	1.27793	19669.2	14.2636
1447.0944@0.919	3	3	1.05287	0.751708	17.6655	17.9695	-1.23454	1.23454	207902	256662	-1.23454	207902	256662	-1.23454	-48760.4	-15.5734
783.3671@4.839	3	3	1.5456	3.28495	15.871	16.9623	-2.13066	2.13066	59930.3	127691	-2.13066	59930.3	127691	-2.13066	-67760.9	-16.0482
306.0557@5.463001	3	3	1.2876	1.32631	16.3579	15.9799	1.29959	1.29959	83991.1	64628.8	1.29959	83991.1	64628.8	1.29959	19362.3	14.241
1968.8064@4.2099996	3	3	7.00272	173.205	5.25332	17.6738	-5481.8	5481.8	38.1424	209089	-5481.81	38.1424	209089	-5481.81	-209051	-17.6735
332.1587@4.424	3	3	0.402917	0.571918	17.3197	16.7747	1.45908	1.45908	163592	112120	1.45908	163592	112120	1.45908	51471.7	15.6515
825.8661@7.0339994	3	3	0.352686	1.83911	16.9685	17.619	-1.56975	1.56975	128239	201303	-1.56975	128239	201303	-1.56975	-73064.2	-16.1569
2797.912@0.9169999	3	3	1.70591	4.39641	15.5366	16.5677	-2.04356	2.04356	47530.7	97131.9	-2.04356	47530.7	97131.9	-2.04356	-49601.2	-15.5981
2810.6138@0.923	3	3	0.699424	2.9886	17.0902	18.0819	-1.98854	1.98854	139532	277464	-1.98854	139532	277464	-1.98854	-137932	-17.0736
1574.4789@5.578999	3	3	1.2219	1.75939	16.7732	16.2497	1.43749	1.43749	112005	77917	1.43749	112005	77917	1.43749	34088.1	15.057
721.2273@1.705	3	3	3.62613	0.601133	16.6841	17.5033	-1.76443	1.76443	105293	185783	-1.76443	105293	185783	-1.76443	-80489.5	-16.2965
608.2897@3.34	3	3	3.38993	6.42207	14.5419	15.7868	-2.37001	2.37001	23853.9	56534.1	-2.37001	23853.9	56534.1	-2.37001	-32680.2	-14.9961
619.3159@4.444	3	3	0.227205	1.31775	17.3263	17.6507	-1.25209	1.25209	164341	205769	-1.25209	164341	205769	-1.25209	-41428	-15.3383
643.2603@1.212	3	3	0.912411	0.900249	17.5241	17.1795	1.26974	1.26974	188481	148441	1.26974	188481	148441	1.26974	40040.3	15.2892
1537.949@0.922	3	3	0.848513	1.63674	17.608	18.1772	-1.48368	1.48368	199776	296403	-1.48368	199776	296403	-1.48368	-96627.1	-16.5601
188.1273@1.1029999	3	3	0.58552	0.356575	16.2928	16.5546	-1.19896	1.19896	80281.7	96254.4	-1.19896	80281.7	96254.4	-1.19896	-15972.7	-13.9633
834.1488@1.4250001	3	3	2.45913	10.7353	15.3084	17.4233	-4.33149	4.33149	40577.8	175762	-4.33149	40577.8	175762	-4.33149	-135185	-17.0446
1401.4512@3.9939997	3	3	1.26799	3.97341	17.7928	18.8609	-2.0968	2.0968	227066	476112	-2.0968	227066	476112	-2.0968	-249046	-17.9261
738.0881@1.3380002	3	3	0.747355	1.16745	16.7502	17.2183	-1.38326	1.38326	110232	152480	-1.38326	110232	152480	-1.38326	-42247.8	-15.3666
544.2103@1.8640002	3	3	1.56224	2.91849	15.3503	16.0419	-1.61504	1.61504	41773	67464.9	-1.61504	41773	67464.9	-1.61504	-25691.9	-14.649
329.0467@6.195	3	3	0.93342	0.0792893	15.8907	16.4338	-1.45713	1.45713	60753.8	88526.1	-1.45713	60753.8	88526.1	-1.45713	-27772.3	-14.7614
590.315@3.9819999	3	3	3.94571	2.68143	16.4223	17.3236	-1.8677	1.8677	87821.8	164024	-1.8677	87821.8	164024	-1.8677	-76202.7	-16.2176
604.7739@4.625	3	3	1.8148	2.23079	16.4507	17.1404	-1.61295	1.61295	89568.1	144469	-1.61295	89568.1	144469	-1.61295	-54900.5	-15.7445
1533.6766@4.861	3	3	0.372347	1.64423	16.3703	16.8339	-1.37892	1.37892	84715.3	116816	-1.37892	84715.3	116816	-1.37892	-32100.7	-14.9703
338.836@16.434002	3	3	1.29768	0.402741	16.2852	16.5611	-1.21071	1.21071	79862	96689.4	-1.21071	79862	96689.4	-1.21071	-16827.4	-14.0385
579.2487@3.417	3	3	5.88078	3.09508	15.7122	16.9263	-2.32	2.32	53682.9	124544	-2.32	53682.9	124544	-2.32	-70861.4	-16.1127
825.1018@7.12	3	3	0.48085	1.36114	16.79	17.1731	-1.30418	1.30418	113316	147783	-1.30418	113316	147783	-1.30418	-34467.9	-15.073
683.2898@5.02	3	3	3.19192	1.44187	16.7906	16.1038	1.60973	1.60973	113365	70424.8	1.60973	113365	70424.8	1.60973	42939.8	15.39
2004.4062@5.277	3	3	1.55984	0.0755314	16.9256	16.5591	1.28929	1.28929	124488	96555.2	1.28929	124488	96555.2	1.28929	27932.5	14.7697
3096.4287@5.4080005	3	3	0.555998	1.626	16.5705	17.1447	-1.48887	1.48887	97322.3	144900	-1.48887	97322.3	144900	-1.48887	-47577.6	-15.538
434.1638@1.707	3	3	4.46686	2.98423	16.107	17.1319	-2.0347	2.0347	70583	143615	-2.0347	70583	143615	-2.0347	-73032.4	-16.1562
246.1107@5.0680003	3	3	86.6218	10.2447	19.2093	8.67734	1480.58	1480.58	606136	409.392	1480.58	606136	409.392	1480.58	605727	19.2083
861.5542@4.6790004	3	3	1.64743	0.650476	16.3665	15.7225	1.5627	1.5627	84492.1	54068.1	1.5627	84492.1	54068.1	1.5627	30424	14.8929
454.1329@10.759002	3	3	1.98992	1.63554	17.2238	16.6317	1.50741	1.50741	153064	101541	1.50741	153064	101541	1.50741	51523.2	15.6529
141.115@5.0989995	3	3	86.8497		0	8.90451	-479.207	479.207	1	479.207	-479.208	1	479.207	-479.208	-478.207	-8.90149
834.3634@4.694	3	3	1.99468	2.21926	17.4471	18.0418	-1.51013	1.51013	178695	269852	-1.51013	178695	269852	-1.51013	-91157.5	-16.4761
660.7812@0.96800005	3	3	1.63093	2.6362	14.9973	15.5803	-1.49798	1.49798	32707.3	48994.8	-1.49798	32707.3	48994.8	-1.49798	-16287.4	-13.9915
797.3797@4.7449994	3	3	2.52177	4.28711	17.0707	18.0805	-2.01351	2.01351	137660	277180	-2.01351	137660	277180	-2.01351	-139520	-17.0901
453.1473@1.6299999	3	3	12.6227	1.83318	16.2181	19.3597	-8.82514	8.82514	76232.6	672763	-8.82514	76232.6	672763	-8.82514	-596531	-19.1862
2247.0232@5.1430006	3	3	2.59779	5.7793	14.4217	16.3944	-3.92493	3.92493	21946.3	86137.7	-3.92493	21946.3	86137.7	-3.92493	-64191.4	-15.9701
1219.7819@4.8730006	3	3	0.432759	3.9262	17.2211	16.4528	1.70321	1.70321	152776	89699	1.70321	152776	89699	1.70321	63077.3	15.9448
2630.58@0.9169999	3	3	1.0002	3.33025	16.4368	17.4255	-1.98436	1.98436	88712.3	176037	-1.98436	88712.3	176037	-1.98436	-87324.4	-16.4141
358.179@5.8419995	3	3	6.04818		0	14.521	-23510.3	23510.3	1	23510.3	-23510.3	1	23510.3	-23510.3	-23509.3	-14.5209
496.9064@5.972	3	3	3.11764	3.01339	16.0571	14.7738	2.43395	2.43395	68183.7	28013.5	2.43395	68183.7	28013.5	2.43395	40170.1	15.2938
475.8165@16.487	3	3	0.6591	2.05136	15.9945	16.5008	-1.42035	1.42035	65288.1	92732.3	-1.42035	65288.1	92732.3	-1.42035	-27444.2	-14.7442
608.2141@1.6070002	3	3	1.9748	2.79467	17.2875	16.4628	1.77115	1.77115	159980	90325.6	1.77115	159980	90325.6	1.77115	69654.5	16.0879
1618.1493@0.923	3	3	1.13466	2.4747	17.0145	17.5904	-1.49059	1.49059	132400	197354	-1.49059	132400	197354	-1.49059	-64954.1	-15.9871
370.1838@4.2039995	3	3	2.74147	5.62991	18.0006	16.5121	2.80589	2.80589	262245	93462.4	2.80589	262245	93462.4	2.80589	168782	17.3648
485.2465@4.3279996	3	3	1.01883	1.86177	17.6676	18.1285	-1.37641	1.37641	208195	286561	-1.37641	208195	286561	-1.37641	-78366.4	-16.2579
781.2626@5.6630006	3	3	1.47344	0.732142	20.244	19.5803	1.58411	1.58411	1.24181e+06	783915	1.58411	1.24181e+06	783915	1.58411	457892	18.8046
237.8244@13.210001	3	3	0.452765	3.54137	15.1121	15.8556	-1.67424	1.67424	35416.4	59295.5	-1.67424	35416.4	59295.5	-1.67424	-23879.2	-14.5435
599.2532@3.0750005	3	3	1.94534		0	16.7573	-110781	110781	1	110781	-110781	1	110781	-110781	-110780	-16.7573
582.4024@4.904	3	3	1.55639	0.886372	17.38	16.9942	1.30661	1.30661	170575	130547	1.30661	170575	130547	1.30661	40027.6	15.2887
344.0311@3.4659998	3	3	2.10417	3.4412	15.5661	14.6246	1.92051	1.92051	48514	25261	1.92051	48514	25261	1.92051	23253	14.5051
1737.6714@5.216	3	3	0.762687	1.67514	16.0748	16.4792	-1.32358	1.32358	69021.9	91356.2	-1.32358	69021.9	91356.2	-1.32358	-22334.4	-14.447
2825.856@0.9320001	3	3	0.486993	2.0645	15.9317	16.7302	-1.73932	1.73932	62504.9	108716	-1.73932	62504.9	108716	-1.73932	-46211	-15.4959
542.3041@3.8250005	3	3	86.615		0	9.55675	-753.128	753.128	1	753.128	-753.128	1	753.128	-753.128	-752.128	-9.55483
1509.1074@0.91300005	3	3	0.745779	0.972563	17.0802	17.616	-1.44972	1.44972	138564	200879	-1.44972	138564	200879	-1.44972	-62315.2	-15.9273
363.0586@5.2690005	3	3	0.588448	2.92688	16.1965	15.5584	1.55631	1.55631	75097.9	48253.7	1.55631	75097.9	48253.7	1.55631	26844.2	14.7123
590.3257@3.9690003	3	3	6.40349	7.7271	14.3313	16.1323	-3.48479	3.48479	20613	71831.9	-3.48479	20613	71831.9	-3.48479	-51218.9	-15.6444
383.0209@11.092002	3	3	4.1525	3.90474	15.8153	14.682	2.19359	2.19359	57659	26285.1	2.19359	57659	26285.1	2.19359	31373.8	14.9373
351.1574@6.5520015	3	3	0.304968	0.770619	16.0231	16.3603	-1.26327	1.26327	66594.7	84126.9	-1.26327	66594.7	84126.9	-1.26327	-17532.2	-14.0977
2902.143@0.93299997	3	3	0.537369	1.57598	17.364	17.7317	-1.29032	1.29032	168691	217665	-1.29032	168691	217665	-1.29032	-48973.8	-15.5797
179.0879@5.2459993	3	3	0.878993	0.718681	16.4457	16.1442	1.23244	1.23244	89260.4	72426	1.23244	89260.4	72426	1.23244	16834.4	14.0391
1484.7108@0.922	3	3	0.198525	3.37214	16.4634	17.6208	-2.23049	2.23049	90361.6	201551	-2.23049	90361.6	201551	-2.23049	-111189	-16.7627
286.098@5.494	3	3	0.107457	0.55456	16.1214	15.8956	1.16943	1.16943	71289.1	60960.5	1.16943	71289.1	60960.5	1.16943	10328.6	13.3344
2536.5527@0.91300005	3	3	0.732579	1.66648	16.1696	16.6859	-1.43029	1.43029	73712.9	105431	-1.43029	73712.9	105431	-1.43029	-31717.7	-14.953
600.2513@1.707	3	3	0.12845	2.63542	16.7465	17.2843	-1.45183	1.45183	109948	159627	-1.45183	109948	159627	-1.45183	-49678.3	-15.6003
1508.7305@0.923	3	3	2.00288	2.0767	15.9585	16.5422	-1.4987	1.4987	63676.7	95431.9	-1.4987	63676.7	95431.9	-1.4987	-31755.3	-14.9547
795.3284@1.2209998	3	3	2.06825	1.06912	15.5256	15.0642	1.37687	1.37687	47170.4	34259.2	1.37687	47170.4	34259.2	1.37687	12911.2	13.6563
1037.4563@4.722	3	3	4.60945	3.02057	15.7353	16.7885	-2.07516	2.07516	54550.6	113202	-2.07516	54550.6	113202	-2.07516	-58650.9	-15.8399
1412.6659@0.92799985	3	3	0.870777	4.9747	14.9259	16.3945	-2.76747	2.76747	31128.3	86146.6	-2.76747	31128.3	86146.6	-2.76747	-55018.3	-15.7476
402.1167@3.9900002	3	3	4.35942	173.205	4.77101	15.2212	-1398.97	1398.97	27.3034	38196.5	-1398.97	27.3034	38196.5	-1398.97	-38169.2	-15.2201
834.3445@4.701	3	3	2.74635	6.27411	19.6111	18.0779	2.89423	2.89423	800818	276694	2.89423	800818	276694	2.89423	524123	18.9995
559.296@3.6510007	3	3	0.494779	0.768936	15.346	15.8245	-1.39334	1.39334	41649.2	58031.5	-1.39334	41649.2	58031.5	-1.39334	-16382.2	-13.9998
2969.3252@0.9169999	3	3	0.795254	4.8797	15.539	16.8372	-2.45925	2.45925	47610.2	117085	-2.45925	47610.2	117085	-2.45925	-69474.9	-16.0842
290.0784@5.9819994	3	3	1.65245	3.43786	16.0259	14.6177	2.65423	2.65423	66725.3	25139.2	2.65423	66725.3	25139.2	2.65423	41586	15.3438
332.1601@3.778	3	3	0.930483	5.00238	16.3953	17.7365	-2.53366	2.53366	86191.7	218380	-2.53366	86191.7	218380	-2.53366	-132189	-17.0122
342.1892@4.2309995	3	3	5.94438	1.28695	15.3262	18.1198	-6.93387	6.93387	41080.9	284850	-6.93387	41080.9	284850	-6.93387	-243769	-17.8952
896.2648@3.8880002	3	3	0.968371	0.931159	16.3224	17.1869	-1.82076	1.82076	81947.1	149206	-1.82076	81947.1	149206	-1.82076	-67259.2	-16.0374
769.3586@3.118	3	3	0.840149	0.859173	15.9431	15.4019	1.45518	1.45518	63000.1	43293.7	1.45518	63000.1	43293.7	1.45518	19706.4	14.2664
629.7112@16.432001	3	3	0.0704189	0.776357	16.9751	17.2324	-1.19525	1.19525	128828	153981	-1.19525	128828	153981	-1.19525	-25153.4	-14.6185
961.6403@4.882	3	3	2.44463	0.579385	17.5896	16.9214	1.58907	1.58907	197236	124120	1.58907	197236	124120	1.58907	73115.9	16.1579
379.0881@4.0250006	3	3	2.33814	0.872519	15.4837	14.6484	1.78432	1.78432	45821.4	25680.1	1.78432	45821.4	25680.1	1.78432	20141.3	14.2979
413.1992@16.410997	3	3	0.682081	0.115594	16.4548	16.0519	1.32209	1.32209	89821.5	67938.8	1.32209	89821.5	67938.8	1.32209	21882.7	14.4175
233.1257@3.9619994	3	3	5.26459	0.460143	18.0354	16.5438	2.81187	2.81187	268652	95542	2.81187	268652	95542	2.81187	173110	17.4013
694.0429@16.347998	3	3	1.49603	2.25709	17.6793	17.0943	1.49999	1.49999	209889	139926	1.49999	209889	139926	1.49999	69962.3	16.0943
263.0788@1.6299999	3	3	2.71164	2.28699	17.8583	16.945	1.88342	1.88342	237627	126168	1.88342	237627	126168	1.88342	111459	16.7662
962.6603@4.8839993	3	3	4.40217	4.10383	16.9891	15.6392	2.54891	2.54891	130084	51035.3	2.54891	130084	51035.3	2.54891	79048.9	16.2705
360.2366@3.681	3	3	1.30836	1.15701	14.5219	15.8196	-2.45831	2.45831	23525	57831.9	-2.45831	23525	57831.9	-2.45831	-34306.9	-15.0662
672.1071@1.3520001	3	3	0.530803	1.65562	16.6234	16.0992	1.43819	1.43819	100959	70198.9	1.43819	100959	70198.9	1.43819	30760.6	14.9088
2685.264@0.91199994	3	3	0.943782	2.24958	16.3669	17.143	-1.71242	1.71242	84515.6	144726	-1.71242	84515.6	144726	-1.71242	-60210.8	-15.8777
611.7193@16.436003	3	3	0.615869	0.401337	17.5266	17.8078	-1.21518	1.21518	188818	229448	-1.21518	188818	229448	-1.21518	-40630.4	-15.3103
358.246@6.82	3	3	6.66282	8.72501	13.78	15.5795	-3.48095	3.48095	14067.2	48967.2	-3.48095	14067.2	48967.2	-3.48095	-34900	-15.0909
356.165@6.2729993	3	3	173.205	2.58055	15.8629	5.22879	1589.18	1589.18	59593.1	37.4992	1589.18	59593.1	37.4992	1589.18	59555.6	15.8619
668.1739@3.222	3	3	3.63303	1.45427	15.5665	16.9843	-2.67165	2.67165	48527.6	129649	-2.67165	48527.6	129649	-2.67165	-81121.4	-16.3078
1265.4496@0.923	3	3	0.430887	2.03603	16.2535	17.2909	-2.05258	2.05258	78123.1	160354	-2.05258	78123.1	160354	-2.05258	-82230.9	-16.3274
629.2649@1.722	3	3	0.440073	0.7261	17.2024	17.5233	-1.24911	1.24911	150815	188386	-1.24911	150815	188386	-1.24911	-37570.1	-15.1973
550.1217@1.2320001	3	3	2.70081	4.59972	15.6699	16.6784	-2.01189	2.01189	52132.4	104884	-2.01189	52132.4	104884	-2.01189	-52752.1	-15.6869
601.3311@5.3020005	3	3	0.836028	0.880855	15.9403	16.3863	-1.36226	1.36226	62878.6	85657.1	-1.36226	62878.6	85657.1	-1.36226	-22778.5	-14.4754
603.2521@1.2340001	3	3	3.41272	0.127046	17.8233	17.0632	1.69365	1.69365	231928	136939	1.69365	231928	136939	1.69365	94988.6	16.5355
364.9334@2.802	3	3	0.32618	0.237498	17.6339	17.3644	1.20541	1.20541	203398	168738	1.20541	203398	168738	1.20541	34660	15.081
3183.6016@0.93900007	3	3	0.730661	1.26116	16.7015	17.2987	-1.51274	1.51274	106575	161221	-1.51274	106575	161221	-1.51274	-54645.9	-15.7378
361.7996@1.073	3	3	1.25831	0.183852	15.8418	15.565	1.21146	1.21146	58729.3	48478.1	1.21146	58729.3	48478.1	1.21146	10251.3	13.3235
399.1995@4.507	3	3	2.48279	2.14922	15.5784	16.2913	-1.63909	1.63909	48930.1	80200.7	-1.63909	48930.1	80200.7	-1.63909	-31270.6	-14.9325
230.1258@4.2760005	3	3	0.902331	1.0263	20.211	20.8979	-1.60986	1.60986	1.21369e+06	1.95388e+06	-1.60986	1.21369e+06	1.95388e+06	-1.60986	-740187	-19.4975
326.0668@6.303001	3	3	0.897046	0.919279	16.2801	16.5603	-1.21434	1.21434	79578.6	96635.6	-1.21434	79578.6	96635.6	-1.21434	-17057	-14.0581
2991.0188@0.94499993	3	3	0.804004	4.20129	16.2996	17.2805	-1.97364	1.97364	80662.6	159199	-1.97364	80662.6	159199	-1.97364	-78536.4	-16.2611
646.7464@4.4560003	3	3	1.23641	1.9562	16.3548	17.1729	-1.76317	1.76317	83806.2	147765	-1.76317	83806.2	147765	-1.76317	-63958.4	-15.9648
455.8201@1.057	3	3	0.425924	0.693908	15.4804	15.6681	-1.13895	1.13895	45715.6	52067.7	-1.13895	45715.6	52067.7	-1.13895	-6352.07	-12.633
1460.1003@0.91300005	3	3	0.277877	0.803964	16.83	17.3741	-1.45807	1.45807	116506	169873	-1.45807	116506	169873	-1.45807	-53367.5	-15.7037
1713.8597@5.4059997	3	3	1.30904	2.21744	15.9601	16.534	-1.48856	1.48856	63748.5	94893.7	-1.48856	63748.5	94893.7	-1.48856	-31145.3	-14.9267
795.8265@1.0430001	3	3	0.817497	1.16734	15.3868	15.0076	1.30057	1.30057	42842.9	32941.6	1.30057	42842.9	32941.6	1.30057	9901.32	13.2734
582.0793@9.893999	3	3	0.488448	1.85146	16.3505	14.5865	3.39641	3.39641	83561.2	24602.8	3.39641	83561.2	24602.8	3.39641	58958.4	15.8474
1704.5421@7.023	3	3	0.359274	6.83866	14.4837	16.1586	-3.19315	3.19315	22909.5	73153.3	-3.19315	22909.5	73153.3	-3.19315	-50243.9	-15.6167
335.8703@16.559002	3	3	0.617589	1.12784	16.4964	16.853	-1.28041	1.28041	92447.8	118371	-1.28041	92447.8	118371	-1.28041	-25923.6	-14.662
827.135@5.5729995	3	3	1.44017	4.24687	16.9206	15.7898	2.18982	2.18982	124051	56649.2	2.18982	124051	56649.2	2.18982	67402.2	16.0405
493.2624@3.5779994	3	3	0.12785	1.20169	16.3327	16.6191	-1.21952	1.21952	82536.4	100655	-1.21952	82536.4	100655	-1.21952	-18118.3	-14.1452
236.0762@1.7170001	3	3	3.18553	2.42035	14.824	15.588	-1.69822	1.69822	29004.9	49256.8	-1.69822	29004.9	49256.8	-1.69822	-20251.9	-14.3058
538.2353@3.347	3	3	1.86322	0.756014	17.2692	16.2959	1.96332	1.96332	157961	80456	1.96332	157961	80456	1.96332	77504.6	16.242
1220.259@0.9169999	3	3	0.347877	2.76441	16.2064	17.155	-1.93008	1.93008	75614.1	145941	-1.93008	75614.1	145941	-1.93008	-70327.1	-16.1018
569.2092@7.418999	3	3	1.05406	3.60257	18.9038	20.2725	-2.58228	2.58228	490477	1.26655e+06	-2.58228	490477	1.26655e+06	-2.58228	-776071	-19.5658
2678.3062@5.312	3	3	0.262553	1.04166	16.5256	16.8465	-1.24916	1.24916	94339.7	117845	-1.24916	94339.7	117845	-1.24916	-23505.4	-14.5207
2630.2036@0.923	3	3	1.57673	1.17972	16.7411	17.3561	-1.53147	1.53147	109543	167763	-1.53147	109543	167763	-1.53147	-58219.5	-15.8292
1652.7368@7.0339994	3	3	0.219565	2.33284	16.405	17.0086	-1.51947	1.51947	86778.3	131857	-1.51947	86778.3	131857	-1.51947	-45078.8	-15.4602
716.1945@1.714	3	3	0.678722	2.48214	16.2394	16.7739	-1.44846	1.44846	77362.6	112056	-1.44846	77362.6	112056	-1.44846	-34693.7	-15.0824
1582.5206@4.1990004	3	3	1.94784	2.26351	15.9879	16.6155	-1.545	1.545	64986.4	100404	-1.545	64986.4	100404	-1.545	-35417.8	-15.1122
2558.312@0.922	3	3	1.12524	1.87266	16.6539	17.2736	-1.5366	1.5366	103112	158442	-1.5366	103112	158442	-1.5366	-55330.2	-15.7558
747.2985@1.7029998	3	3	0.233017	0.78828	17.4726	17.6786	-1.15347	1.15347	181874	209785	-1.15347	181874	209785	-1.15347	-27911.6	-14.7686
549.3502@5.173	3	3	0.598678	0.5013	15.9013	16.1532	-1.19071	1.19071	61203.7	72876.1	-1.19071	61203.7	72876.1	-1.19071	-11672.4	-13.5108
518.24@5.216	3	3	3.70874	173.205	5.47459	15.8861	-1361.99	1361.99	44.4646	60560.1	-1361.99	44.4646	60560.1	-1361.99	-60515.7	-15.885
465.8049@16.432001	3	3	0.466155	0.358571	17.0112	17.2743	-1.20003	1.20003	132097	158520	-1.20003	132097	158520	-1.20003	-26423.4	-14.6895
562.2081@5.2270007	3	3	2.26692	0.990469	17.0167	15.5436	2.7763	2.7763	132600	47761.6	2.7763	132600	47761.6	2.7763	84838.8	16.3724
411.0938@5.236	3	3	0.570677	0.243069	16.5806	16.3067	1.20908	1.20908	98004.9	81057.7	1.20908	98004.9	81057.7	1.20908	16947.2	14.0488
419.0456@5.9759994	3	3	3.23918	2.92487	16.2142	15.1825	2.04448	2.04448	76026.6	37186.3	2.04448	76026.6	37186.3	2.04448	38840.2	15.2453
543.0516@14.076003	3	3	0.490727	0.909887	16.7169	16.2056	1.42535	1.42535	107716	75571.8	1.42535	107716	75571.8	1.42535	32144.6	14.9723
466.9875@5.974999	3	3	4.18775	3.38507	15.9448	14.3934	2.93112	2.93112	63077.6	21520	2.93112	63077.6	21520	2.93112	41557.6	15.3428
275.0763@4.8649993	3	3	3.60534	1.18394	17.8766	17.1205	1.68894	1.68894	240658	142491	1.68894	240658	142491	1.68894	98167	16.583
357.1527@4.1959996	3	3	4.92474	3.77491	17.8043	16.6194	2.27338	2.27338	228886	100681	2.27338	228886	100681	2.27338	128205	16.9681
411.228@7.9639997	3	3	0.727156	0.625183	16.48	16.266	1.1599	1.1599	91405.5	78805	1.1599	91405.5	78805	1.1599	12600.6	13.6212
1361.9062@4.951	3	3	1.71561	1.30573	17.0156	16.5497	1.38121	1.38121	132499	95929.6	1.38121	132499	95929.6	1.38121	36569	15.1583
595.7805@5.188	3	3	0.983276	6.46615	15.0331	16.1982	-2.24239	2.24239	33529.5	75186.1	-2.24239	33529.5	75186.1	-2.24239	-41656.7	-15.3463
1172.1964@1.309	3	3	0.591532	1.74862	17.9271	18.3333	-1.32523	1.32523	249224	330279	-1.32523	249224	330279	-1.32523	-81055.4	-16.3066
244.0689@1.715	3	3	0.934454	0.445741	20.8445	20.5194	1.25279	1.25279	1.8829e+06	1.50296e+06	1.25279	1.8829e+06	1.50296e+06	1.25279	379933	18.5354
635.7379@4.2309995	3	3	2.77061	4.28146	15.7867	17.2889	-2.83279	2.83279	56528.6	160134	-2.83279	56528.6	160134	-2.83279	-103605	-16.6607
1249.8964@0.9320001	3	3	0.737126	1.34816	16.4699	17.3677	-1.86322	1.86322	90766.3	169117	-1.86322	90766.3	169117	-1.86322	-78350.9	-16.2577
689.324@1.6189996	3	3	1.15381	2.13067	15.6377	16.2218	-1.49908	1.49908	50982.6	76426.9	-1.49908	50982.6	76426.9	-1.49908	-25444.3	-14.6351
561.7329@16.445002	3	3	0.423916	0.614727	17.1616	17.4138	-1.19104	1.19104	146609	174617	-1.19104	146609	174617	-1.19104	-28008.3	-14.7736
353.0756@3.6399996	3	3	8.0207	0.40828	20.2348	17.5135	6.59469	6.59469	1.23392e+06	187107	6.59469	1.23392e+06	187107	6.59469	1.04681e+06	19.9976
2243.5027@0.92799985	3	3	1.36503	3.09647	15.9221	16.6461	-1.65184	1.65184	62089.7	102562	-1.65184	62089.7	102562	-1.65184	-40472.5	-15.3047
773.2647@5.5919995	3	3	0.874252	3.16949	16.1733	15.4206	1.68499	1.68499	73901.4	43858.8	1.68499	73901.4	43858.8	1.68499	30042.7	14.8747
103.9185@16.431	3	3	0.112242	1.38296	17.0895	17.4691	-1.30093	1.30093	139464	181432	-1.30093	139464	181432	-1.30093	-41968.6	-15.357
583.7179@16.442999	3	3	0.163875	0.615468	17.1043	17.3344	-1.17295	1.17295	140895	165263	-1.17295	140895	165263	-1.17295	-24367.3	-14.5727
304.094@5.256	3	3	0.682425	0.807375	15.9167	14.7619	2.22646	2.22646	61857.8	27783	2.22646	61857.8	27783	2.22646	34074.8	15.0564
647.2614@5.2970004	3	3	3.01959	3.77252	15.812	16.9365	-2.18027	2.18027	57528.9	125429	-2.18027	57528.9	125429	-2.18027	-67899.7	-16.0511
2850.9463@0.91300005	3	3	0.675307	3.58821	16.3127	17.4562	-2.20917	2.20917	81396.2	179818	-2.20917	81396.2	179818	-2.20917	-98421.9	-16.5867
421.813@16.477001	3	3	0.653656	0.591927	17.1796	17.4739	-1.22627	1.22627	148453	182044	-1.22627	148453	182044	-1.22627	-33591	-15.0358
682.116@5.439999	3	3	2.3882	2.52286	15.8176	14.2749	2.91343	2.91343	57754.2	19823.4	2.91343	57754.2	19823.4	2.91343	37930.7	15.2111
327.7999@16.520002	3	3	0.860017	0.73192	16.1187	16.4749	-1.28011	1.28011	71154.6	91085.9	-1.28011	71154.6	91085.9	-1.28011	-19931.2	-14.2827
1335.7952@0.9169999	3	3	1.02001	2.25913	15.7395	16.8097	-2.09964	2.09964	54709.9	114871	-2.09964	54709.9	114871	-2.09964	-60161	-15.8765
375.1785@5.173	3	3	5.02906	2.85463	15.0196	16.1839	-2.24133	2.24133	33215.4	74446.8	-2.24133	33215.4	74446.8	-2.24133	-41231.3	-15.3315
312.1388@6.2540007	3	3	173.205	5.42843	15.6506	5.16119	1437.59	1437.59	51440.8	35.7826	1437.59	51440.8	35.7826	1437.59	51405	15.6496
408.9324@5.855	3	3	0.510977	0.990036	15.865	15.6069	1.19593	1.19593	59682	49904.3	1.19593	59682	49904.3	1.19593	9777.68	13.2553
2798.273@0.923	3	3	2.23455	5.84654	15.2683	16.536	-2.4078	2.4078	39465.3	95024.8	-2.4078	39465.3	95024.8	-2.4078	-55559.5	-15.7617
429.1494@3.0599997	3	3	1.52382	3.57079	16.1417	14.3575	3.44423	3.44423	72299.2	20991.4	3.44423	72299.2	20991.4	3.44423	51307.8	15.6469
1872.8586@5.701	3	3	0.295934	0.708161	16.7428	16.3576	1.30602	1.30602	109669	83971.6	1.30602	109669	83971.6	1.30602	25697.3	14.6493
589.2952@4.242	3	3	0.954264	8.32803	15.4059	17.0348	-3.09288	3.09288	43414.6	134276	-3.09288	43414.6	134276	-3.09288	-90861.4	-16.4714
711.279@3.028	3	3		8.16741	15.5704	0	48658.7	48658.7	48658.7	1	48658.7	48658.7	1	48658.7	48657.7	15.5704
979.6892@4.903	3	3	0.837512	0.871425	17.6644	17.3369	1.25487	1.25487	207736	165544	1.25487	207736	165544	1.25487	42192.6	15.3647
1284.5693@4.265	3	3	6.22977	5.31717	15.2132	17.0588	-3.59392	3.59392	37987.4	136524	-3.59392	37987.4	136524	-3.59392	-98536.5	-16.5884
1791.5443@3.8880002	3	3	2.35073	0.931159	16.3224	17.0502	-1.65616	1.65616	81947.1	135717	-1.65616	81947.1	135717	-1.65616	-53770.2	-15.7145
1482.5914@4.659	3	3	0.510275	2.30632	16.3331	15.8708	1.37777	1.37777	82556	59920.1	1.37777	82556	59920.1	1.37777	22635.9	14.4663
760.6438@1.158	3	3	3.59717	0.121988	17.2938	15.4092	3.69254	3.69254	160676	43513.5	3.69254	160676	43513.5	3.69254	117162	16.8381
1219.5892@0.92	3	3	1.25006	3.33832	15.4784	16.5568	-2.11169	2.11169	45652.8	96404.8	-2.11169	45652.8	96404.8	-2.11169	-50752	-15.6312
274.1018@4.2550006	3	3	2.12447	1.1548	17.2098	16.6826	1.44109	1.44109	151588	105190	1.44109	151588	105190	1.44109	46398.3	15.5018
2853.1943@0.9169999	3	3	0.50235	2.63292	17.7581	18.6634	-1.8729	1.8729	221678	415181	-1.8729	221678	415181	-1.8729	-193503	-17.562
1457.0059@0.923	3	3	0.542013	2.37918	17.044	18.0366	-1.9897	1.9897	135132	268872	-1.9897	135132	268872	-1.9897	-133740	-17.0291
523.2293@1.156	3	3	0.85001	0.833052	16.0753	16.3896	-1.24336	1.24336	69048	85851.8	-1.24336	69048	85851.8	-1.24336	-16803.8	-14.0365
525.1686@1.1569998	3	3	7.44798	4.8632	17.2806	15.3487	3.8155	3.8155	159212	41727.8	3.8155	159212	41727.8	3.8155	117485	16.8421
469.9316@5.972	3	3	5.03571	3.61931	16.1545	14.5974	2.94248	2.94248	72942.9	24789.6	2.94248	72942.9	24789.6	2.94248	48153.3	15.5553
251.8657@16.563002	3	3	2.54252	1.17382	16.2696	16.8379	-1.48282	1.48282	79000.9	117144	-1.48282	79000.9	117144	-1.48282	-38143.6	-15.2192
2392.5@0.93299997	3	3	1.13838	4.41388	15.0239	16.3116	-2.44145	2.44145	33315	81336.8	-2.44145	33315	81336.8	-2.44145	-48021.8	-15.5514
876.3286@1.6189996	3	3	0.395985	0.271362	15.5976	15.9192	-1.24968	1.24968	49584.8	61965.2	-1.24968	49584.8	61965.2	-1.24968	-12380.4	-13.5958
2625.2322@5.5779996	3	3	0.826491	2.08651	16.1454	16.6581	-1.42675	1.42675	72483.1	103416	-1.42675	72483.1	103416	-1.42675	-30932.5	-14.9168
1304.4633@4.4819994	3	3	1.09307	1.39307	16.9139	17.3255	-1.33023	1.33023	123476	164252	-1.33023	123476	164252	-1.33023	-40775.4	-15.3154
1965.909@5.418999	3	3	1.12421	1.51547	16.6947	17.1322	-1.35419	1.35419	106077	143649	-1.35419	106077	143649	-1.35419	-37571.8	-15.1974
560.2807@3.66	3	3	1.79698	1.87707	15.3962	15.9132	-1.43098	1.43098	43122.9	61708	-1.43098	43122.9	61708	-1.43098	-18585.1	-14.1819
615.7115@16.438997	3	3	0.719817	0.447805	16.9241	17.2808	-1.2805	1.2805	124353	159235	-1.2805	124353	159235	-1.2805	-34881.1	-15.0902
1103.3444@3.972	3	3	0.205047	3.27413	14.5651	16.1791	-3.06106	3.06106	24240.2	74200.6	-3.06106	24240.2	74200.6	-3.06106	-49960.4	-15.6085
579.3021@4.4420004	3	3	2.35785	10.0495	15.7331	17.6595	-3.80124	3.80124	54466.3	207039	-3.80124	54466.3	207039	-3.80124	-152573	-17.2191
1253.2706@3.125	3	3	2.10618	3.57959	16.3621	17.2152	-1.80632	1.80632	84235.8	152157	-1.80632	84235.8	152157	-1.80632	-67920.7	-16.0516
1529.7255@0.92399985	3	3	0.360168	2.14584	17.0985	17.5697	-1.38631	1.38631	140333	194544	-1.38631	140333	194544	-1.38631	-54211.9	-15.7263
239.1153@3.597	3	3	0.82006	1.60677	16.1439	15.6325	1.42535	1.42535	72407.6	50799.9	1.42535	72407.6	50799.9	1.42535	21607.7	14.3993
418.0153@5.9809995	3	3		11.6611	15.2987	0	40307.1	40307.1	40307.1	1	40307.1	40307.1	1	40307.1	40306.1	15.2987
2705.2578@0.9169999	3	3	0.887331	3.35149	15.495	16.9287	-2.70146	2.70146	46180.3	124754	-2.70146	46180.3	124754	-2.70146	-78574.1	-16.2618
370.2018@7.2539997	3	3	173.205	4.78604	13.5315	4.39361	563.338	563.338	11840.7	21.0189	563.338	11840.7	21.0189	563.338	11819.7	13.5289
882.3853@7.464999	3	3	1.02506	1.34985	16.2673	16.8205	-1.46736	1.46736	78875.6	115739	-1.46736	78875.6	115739	-1.46736	-36863.5	-15.1699
549.1201@3.7579997:2	3	3	1.55751	0.692036	16.2205	16.5928	-1.29443	1.29443	76358.4	98840.4	-1.29443	76358.4	98840.4	-1.29443	-22482	-14.4565
3227.422@4.1230006	3	3	2.22612	173.205	4.87192	16.3341	-2821.46	2821.46	29.2814	82616.3	-2821.46	29.2814	82616.3	-2821.46	-82587	-16.3336
1385.5837@0.91300005	3	3	0.609235	2.657	16.347	17.3114	-1.95128	1.95128	83353.7	162647	-1.95128	83353.7	162647	-1.95128	-79292.8	-16.2749
1539.1309@1.1149999	3	3	3.8225	1.86683	17.2228	14.1242	8.56558	8.56558	152956	17857	8.56558	152956	17857	8.56558	135099	17.0437
2552.8967@0.922	3	3	1.22436	0.603986	16.6538	17.2686	-1.53136	1.53136	103107	157895	-1.53136	103107	157895	-1.53136	-54787.1	-15.7415
1355.6934@0.9169999	3	3	0.998494	2.19755	15.3777	16.4264	-2.06873	2.06873	42574.2	88074.5	-2.06873	42574.2	88074.5	-2.06873	-45500.3	-15.4736
661.1054@6.251	3	3	2.73969	2.21775	15.3833	13.2084	4.51555	4.51555	42740.9	9465.27	4.51555	42740.9	9465.27	4.51555	33275.6	15.0222
280.1413@4.743	3	3	3.24771	1.75481	16.0065	15.3666	1.5582	1.5582	65831.5	42248.5	1.5582	65831.5	42248.5	1.5582	23583	14.5255
503.2581@3.2210004	3	3	1.59921	2.54975	14.9682	15.5475	-1.4941	1.4941	32054.1	47892	-1.4941	32054.1	47892	-1.4941	-15837.9	-13.9511
622.1312@6.0180006	3	3	1.58195	2.05452	16.3333	14.6104	3.3011	3.3011	82569.5	25012.7	3.3011	82569.5	25012.7	3.3011	57556.7	15.8127
1619.3431@0.926	3	3	0.403632	2.37367	17.5202	18.2533	-1.66225	1.66225	187972	312455	-1.66225	187972	312455	-1.66225	-124484	-16.9256
1331.4481@3.1580002	3	3	0.432428	0.419619	16.0952	16.3899	-1.22665	1.22665	70007.2	85874.3	-1.22665	70007.2	85874.3	-1.22665	-15867.1	-13.9538
504.2597@4.5950003	3	3	2.69253	7.03182	17.3104	18.902	-3.01371	3.01371	162538	489841	-3.01371	162538	489841	-3.01371	-327303	-18.3203
384.0478@4.7760005	3	3	0.326032	0.944551	15.5658	15.8272	-1.1987	1.1987	48502.5	58140	-1.1987	48502.5	58140	-1.1987	-9637.56	-13.2345
523.1467@6.221	3	3	5.81578	4.01624	16.1747	14.8243	2.54969	2.54969	73970.1	29011.4	2.54969	73970.1	29011.4	2.54969	44958.7	15.4563
1033.6703@4.7970004	3	3	1.16845	0.433842	16.6933	16.3893	1.23456	1.23456	105967	85833.6	1.23456	105967	85833.6	1.23456	20133.1	14.2973
3220.495@0.922	3	3	0.293967	2.70045	15.9931	16.7388	-1.67674	1.67674	65225	109365	-1.67674	65225	109365	-1.67674	-44140.1	-15.4298
306.9206@16.442	3	3	0.576234	0.486124	17.1299	17.4324	-1.23322	1.23322	143426	176876	-1.23322	143426	176876	-1.23322	-33449.7	-15.0297
808.5293@4.6679997	3	3	1.22942	2.95472	15.7384	14.9837	1.68729	1.68729	54668.5	32400.2	1.68729	54668.5	32400.2	1.68729	22268.3	14.4427
715.2166@3.094	3	3	2.3144	173.205	5.12879	15.1918	-1069.75	1069.75	34.988	37428.4	-1069.75	34.988	37428.4	-1069.75	-37393.4	-15.1905
2948.5874@0.9320001	3	3	0.566496	1.90076	16.0384	16.5405	-1.41624	1.41624	67305.5	95320.6	-1.41624	67305.5	95320.6	-1.41624	-28015.1	-14.7739
1613.583@4.2190003	3	3	1.62324	4.5427	17.0146	18.1974	-2.27011	2.27011	132405	300574	-2.27011	132405	300574	-2.27011	-168169	-17.3595
853.3572@4.9249997	3	3	0.793871	1.64117	15.3304	16.539	-2.31099	2.31099	41202.5	95218.7	-2.31099	41202.5	95218.7	-2.31099	-54016.2	-15.7211
758.4285@4.7960005	3	3	0.668187	0.413652	16.6933	16.9169	-1.16763	1.16763	105974	123739	-1.16763	105974	123739	-1.16763	-17764.9	-14.1167
1053.6527@4.8839993	3	3	0.846936	1.09222	17.1881	16.6182	1.48448	1.48448	149329	100593	1.48448	149329	100593	1.48448	48735.7	15.5727
1219.9211@0.91199994	3	3	1.0594	3.49275	14.997	16.2144	-2.32521	2.32521	32700.4	76035.2	-2.32521	32700.4	76035.2	-2.32521	-43334.8	-15.4032
992.6854@4.9560003	3	3	1.81087	2.27058	17.9527	17.0626	1.85328	1.85328	253686	136885	1.85328	253686	136885	1.85328	116801	16.8337
353.1516@4.513	3	3	5.93009	173.205	5.43143	16.2361	-1788.6	1788.6	43.1543	77186	-1788.6	43.1543	77186	-1788.6	-77142.8	-16.2352
656.7982@3.6409998	3	3	1.72639	2.74904	15.3838	14.7404	1.56198	1.56198	42754.5	27372	1.56198	42754.5	27372	1.56198	15382.5	13.909
3044.2676@0.9209999	3	3	0.0861115	1.85648	16.5618	17.2336	-1.59303	1.59303	96738.2	154106	-1.59303	96738.2	154106	-1.59303	-57368.3	-15.808
126.0681@6.303001	3	3	0.28178	0.24019	16.1026	16.478	-1.29717	1.29717	70366.8	91277.4	-1.29717	70366.8	91277.4	-1.29717	-20910.6	-14.3519
230.0514@6.223	3	3	1.60414	4.2872	14.8094	16.1952	-2.61326	2.61326	28712	75031.8	-2.61326	28712	75031.8	-2.61326	-46319.9	-15.4993
1239.2856@7.0449986	3	3	0.323719	0.717496	17.7657	18.4369	-1.59234	1.59234	222855	354860	-1.59234	222855	354860	-1.59234	-132005	-17.0102
1677.487@4.1440005	3	3	0.379785	1.90444	16.2133	16.9925	-1.71609	1.71609	75980.8	130390	-1.71609	75980.8	130390	-1.71609	-54409.2	-15.7316
336.1175@5.3979993	3	3	1.51065	1.62242	16.1072	16.5616	-1.37019	1.37019	70590.7	96722.5	-1.37019	70590.7	96722.5	-1.37019	-26131.7	-14.6735
629.7067@16.433	3	3	0.647005	1.69145	16.7208	17.1329	-1.33057	1.33057	108013	143719	-1.33057	108013	143719	-1.33057	-35705.7	-15.1239
659.2636@4.327	3	3	0.988611	3.71124	17.0199	17.7443	-1.65218	1.65218	132891	219559	-1.65218	132891	219559	-1.65218	-86668.2	-16.4032
307.0902@1.7089998	3	3	1.59496	2.37291	16.8801	16.2366	1.56214	1.56214	120618	77213.6	1.56214	120618	77213.6	1.56214	43404.5	15.4056
151.8969@13.212	3	3	3.02953	4.28321	14.6962	15.7237	-2.03847	2.03847	26546.2	54113.7	-2.03847	26546.2	54113.7	-2.03847	-27567.5	-14.7507
188.8671@16.425999	3	3	0.238	1.32366	15.6311	16.0411	-1.32866	1.32866	50749.8	67429	-1.32866	50749.8	67429	-1.32866	-16679.2	-14.0258
254.0163@1.1359999	3	3	0.266931	0.514309	16.2687	16.4265	-1.11563	1.11563	78952.2	88081.1	-1.11563	78952.2	88081.1	-1.11563	-9128.85	-13.1562
2806.5557@0.922	3	3	0.395167	3.0784	16.1577	16.9533	-1.73573	1.73573	73107.5	126895	-1.73573	73107.5	126895	-1.73573	-53787.7	-15.715
696.0764@6.0800004	3	3	0.890002	1.66036	16.4921	16.0163	1.39069	1.39069	92174.1	66279.3	1.39069	92174.1	66279.3	1.39069	25894.7	14.6604
551.7841@16.498	3	3	0.804723	0.501752	17.2623	17.6367	-1.2963	1.2963	157209	203790	-1.2963	157209	203790	-1.2963	-46581.5	-15.5075
487.2579@4.911	3	3	2.27632	173.205	5.18968	15.8356	-1602.28	1602.28	36.4965	58477.7	-1602.28	36.4965	58477.7	-1602.28	-58441.2	-15.8347
770.3194@5.4389997	3	3	3.57099	1.5537	16.0021	14.9847	2.02427	2.02427	65632.3	32422.7	2.02427	65632.3	32422.7	2.02427	33209.6	15.0193
1237.3018@3.1229997	3	3	0.511099	2.32886	15.9045	16.3397	-1.3521	1.3521	61338.4	82935.4	-1.3521	61338.4	82935.4	-1.3521	-21597	-14.3985
338.855@16.434002	3	3	0.745791	1.40568	16.3686	16.7488	-1.3015	1.3015	84614.3	110125	-1.3015	84614.3	110125	-1.3015	-25511.2	-14.6388
648.1111@7.3099995	3	3	0.167094	3.92449	18.8923	17.2736	3.07099	3.07099	486572	158441	3.07099	486572	158441	3.07099	328131	18.3239
716.3673@5.2880006	3	3	2.52816	2.10282	16.0417	16.6698	-1.54552	1.54552	67457	104256	-1.54552	67457	104256	-1.54552	-36798.8	-15.1674
1354.8896@0.91300005	3	3	0.521478	1.69537	16.5725	17.3929	-1.76582	1.76582	97460.8	172099	-1.76582	97460.8	172099	-1.76582	-74637.8	-16.1876
2846.614@0.926	3	3	0.626513	1.71108	16.4381	16.8579	-1.33781	1.33781	88786.9	118780	-1.33781	88786.9	118780	-1.33781	-29993.3	-14.8724
1607.6069@3.6209998	3	3	1.58307	1.73439	16.2855	16.9766	-1.61454	1.61454	79877.4	128965	-1.61454	79877.4	128965	-1.61454	-49087.8	-15.5831
1647.3217@0.975	3	3	0.488757	2.90746	16.7914	17.36	-1.48309	1.48309	113427	168222	-1.48309	113427	168222	-1.48309	-54795	-15.7418
1353.7775@0.922	3	3	0.895239	0.833054	16.6361	17.078	-1.35837	1.35837	101851	138352	-1.35837	101851	138352	-1.35837	-36500.3	-15.1556
154.0651@5.2589993	3	3	1.31538	2.05065	16.0921	16.5791	-1.40148	1.40148	69857.8	97904	-1.40148	69857.8	97904	-1.40148	-28046.2	-14.7755
318.0726@3.9630003	3	3	1.86941	0.987946	15.8369	14.5736	2.40041	2.40041	58528.9	24382.9	2.40041	58528.9	24382.9	2.40041	34146	15.0594
209.071@5.278	3	3	0.752508	1.4066	15.8337	16.1413	-1.23766	1.23766	58400.5	72280	-1.23766	58400.5	72280	-1.23766	-13879.5	-13.7607
513.0532@2.205	3	3	0.260429	0.264186	17.1455	16.8284	1.24578	1.24578	144978	116375	1.24578	144978	116375	1.24578	28602.5	14.8039
321.1336@3.8590002	3	3	0.86806	1.83439	17.2875	18.6565	-2.58295	2.58295	159971	413199	-2.58296	159971	413199	-2.58296	-253228	-17.9501
270.0867@1.8059999	3	3	1.02749	2.01424	15.8474	16.2678	-1.33829	1.33829	58958	78902.9	-1.33829	58958	78902.9	-1.33829	-19944.9	-14.2837
678.1205@7.2070003	3	3	9.60138	5.62723	15.8823	14.0704	3.51102	3.51102	60399.9	17203	3.51102	60399.9	17203	3.51102	43196.9	15.3986
849.5297@4.6720004	3	3	2.05308	0.311125	15.9228	15.5042	1.33663	1.33663	62121.9	46476.4	1.33663	62121.9	46476.4	1.33663	15645.4	13.9335
859.2709@3.4699998	3	3	1.01107	3.44461	15.5184	16.3742	-1.8097	1.8097	46937	84941.9	-1.8097	46937	84941.9	-1.8097	-38004.9	-15.2139
1250.6798@0.922	3	3	1.31489	3.17348	15.9235	16.715	-1.7309	1.7309	62150.9	107577	-1.7309	62150.9	107577	-1.7309	-45425.8	-15.4712
418.2105@5.7190003	3	3	0.517497	0.270045	16.6558	16.8215	-1.12175	1.12175	103248	115819	-1.12175	103248	115819	-1.12175	-12570.9	-13.6178
1628.1166@0.92399985	3	3	0.640526	1.4586	17.6577	18.2484	-1.50588	1.50588	206781	311388	-1.50588	206781	311388	-1.50588	-104607	-16.6746
535.203@1.714	3	3	1.1061	0.834512	17.1116	17.7572	-1.56444	1.56444	141613	221546	-1.56444	141613	221546	-1.56444	-79932.6	-16.2865
308.0523@5.467999	3	3	1.19378	1.85567	15.9051	15.0243	1.84145	1.84145	61364	33323.7	1.84145	61364	33323.7	1.84145	28040.3	14.7752
360.1496@1.6169999	3	3	0.418922	1.3652	15.6709	16.158	-1.40161	1.40161	52169.3	73120.9	-1.40161	52169.3	73120.9	-1.40161	-20951.5	-14.3548
1012.5202@4.8079996	3	3	1.87446	3.69995	15.5451	16.7665	-2.33171	2.33171	47812.8	111485	-2.33171	47812.8	111485	-2.33171	-63672.6	-15.9584
1118.7635@4.895	3	3	0.886441	0.652205	17.6278	17.298	1.25684	1.25684	202540	161150	1.25684	202540	161150	1.25684	41389.7	15.337
1269.4532@1.7019998	3	3	0.486428	1.55423	16.1467	16.4593	-1.24198	1.24198	72549.2	90104.7	-1.24198	72549.2	90104.7	-1.24198	-17555.5	-14.0996
609.447@0.975	3	3	2.03142	0.535863	15.0571	15.5597	-1.41676	1.41676	34090.5	48297.9	-1.41676	34090.5	48297.9	-1.41676	-14207.4	-13.7944
1692.8395@0.915	3	3	0.53383	2.62462	16.2459	17.3394	-2.13394	2.13394	77714.8	165839	-2.13394	77714.8	165839	-2.13394	-88124.1	-16.4272
575.2032@1.236	3	3	1.10337	1.02236	18.4259	18.0447	1.30244	1.30244	352167	270391	1.30244	352167	270391	1.30244	81776.3	16.3194
690.1477@1.2630001	3	3	1.27136	0.0812778	17.4249	16.844	1.49578	1.49578	175966	117642	1.49578	175966	117642	1.49578	58324	15.8318
722.3994@4.7540007	3	3	2.94541	1.2779	16.9426	17.5669	-1.54143	1.54143	125958	194157	-1.54143	125958	194157	-1.54143	-68198.2	-16.0574
276.1568@4.7830005	3	3	0.794099	0.995213	15.8347	16.2338	-1.3187	1.3187	58441.1	77066.6	-1.3187	58441.1	77066.6	-1.3187	-18625.5	-14.185
2631.109@0.923	3	3	0.95664	3.32241	15.3303	16.5984	-2.40844	2.40844	41199.3	99226.1	-2.40844	41199.3	99226.1	-2.40844	-58026.8	-15.8244
1387.628@5.034	3	3	1.65135	1.73804	15.48	16.468	-1.98341	1.98341	45702	90645.9	-1.98341	45702	90645.9	-1.98341	-44943.9	-15.4558
434.2368@5.3310003	3	3	0.573902	1.19233	16.3755	16.979	-1.51941	1.51941	85017.2	129176	-1.51941	85017.2	129176	-1.51941	-44159	-15.4304
2545.8872@0.9169999	3	3	1.10878	1.42422	16.7738	17.181	-1.32611	1.32611	112050	148590	-1.32611	112050	148590	-1.32611	-36540.3	-15.1572
172.0732@5.021	3	3	0.166306	2.75713	16.3028	16.8502	-1.46146	1.46146	80838.3	118142	-1.46146	80838.3	118142	-1.46146	-37303.5	-15.187
217.0372@4.541	3	3	0.0923809	1.4539	15.866	16.2753	-1.32803	1.32803	59724.4	79315.8	-1.32803	59724.4	79315.8	-1.32803	-19591.4	-14.2579
418.1955@3.7470002	3	3	1.0386	2.11884	17.0552	17.79	-1.66413	1.66413	136184	226627	-1.66413	136184	226627	-1.66413	-90443.6	-16.4647
1467.4587@1.7019998	3	3	1.87252	2.59575	17.2384	16.6139	1.54173	1.54173	154624	100293	1.54173	154624	100293	1.54173	54331.5	15.7295
541.2739@4.2399993	3	3	0.269431	0.94423	17.2561	16.7509	1.41931	1.41931	156529	110285	1.41931	156529	110285	1.41931	46243.6	15.497
2397.1277@5.532001	3	3	1.00818	2.12628	15.9034	15.4242	1.39401	1.39401	61292	43968.2	1.39401	61292	43968.2	1.39401	17323.9	14.0805
551.1154@3.3880002	3	3	8.7559	16.8716	12.557	15.6258	-8.39094	8.39094	6026.1	50564.7	-8.39094	6026.1	50564.7	-8.39094	-44538.6	-15.4428
1597.3153@0.93900007	3	3	0.315559	1.57817	17.3875	17.8409	-1.36934	1.36934	171455	234780	-1.36934	171455	234780	-1.36934	-63324.8	-15.9505
230.9216@16.432001	3	3	0.503934	0.450413	15.7021	16.0074	-1.23569	1.23569	53310.4	65875.1	-1.23569	53310.4	65875.1	-1.23569	-12564.7	-13.6171
527.2972@4.4130006	3	3	1.57006	1.34965	17.3605	17.7938	-1.35032	1.35032	168276	227226	-1.35032	168276	227226	-1.35032	-58950.7	-15.8472
293.1217@3.3969996	3	3	2.98676	3.14428	16.9706	16.1745	1.73648	1.73648	128431	73960.5	1.73648	128431	73960.5	1.73648	54470.7	15.7332
830.3541@4.5600004	3	3	2.4936	1.22088	18.2212	17.2437	1.96901	1.96901	305577	155193	1.96901	305577	155193	1.96901	150384	17.1983
214.0625@4.861	3	3	3.05562	2.18494	15.3504	14.5852	1.69968	1.69968	41777.4	24579.6	1.69968	41777.4	24579.6	1.69968	17197.8	14.0699
1038.3053@3.0200002	3	3	0.324898	0.338333	16.3719	16.2243	1.10776	1.10776	84809.1	76559.3	1.10776	84809.1	76559.3	1.10776	8249.73	13.0101
3080.2185@0.9440002	3	3	0.134909	0.460136	16.9892	17.3636	-1.29626	1.29626	130098	168641	-1.29626	130098	168641	-1.29626	-38543	-15.2342
1256.2725@2.8069994	3	3	0.696568	3.44508	16.4328	17.1999	-1.70182	1.70182	88465.8	150553	-1.70182	88465.8	150553	-1.70182	-62086.7	-15.922
542.0427@1.3710002	3	3	1.99905	0.742234	16.1286	15.6613	1.3825	1.3825	71646.9	51824	1.3825	71646.9	51824	1.3825	19822.8	14.2749
1172.5776@5.3040004	3	3	1.87935	2.90919	15.7682	14.7932	1.96562	1.96562	55807.4	28391.7	1.96562	55807.4	28391.7	1.96562	27415.7	14.7427
758.4851@0.96599996	3	3	1.81273	1.29587	14.8642	15.3675	-1.41748	1.41748	29824.6	42275.7	-1.41748	29824.6	42275.7	-1.41748	-12451.1	-13.604
383.3101@3.4160001	3	3	4.79738	4.77689	17.5807	16.1856	2.62994	2.62994	196024	74535.3	2.62994	196024	74535.3	2.62994	121488	16.8905
2201.4175@4.9010005	3	3	1.56459	1.66254	16.8727	16.3259	1.46082	1.46082	120004	82148.6	1.46082	120004	82148.6	1.46082	37855.7	15.2082
646.0956@7.666	3	3	1.77478	3.73725	16.2967	14.5679	3.31449	3.31449	80501.1	24287.6	3.31449	80501.1	24287.6	3.31449	56213.4	15.7786
462.1477@4.1559997	3	3	0.504152	5.45053	16.4861	15.2978	2.27881	2.27881	91794.4	40281.7	2.27881	91794.4	40281.7	2.27881	51512.7	15.6526
383.758@1.0819999	3	3	1.10844	0.649504	15.3845	15.66	-1.21039	1.21039	42775.7	51775.3	-1.21039	42775.7	51775.3	-1.21039	-8999.54	-13.1356
270.0997@6.1559997	3	3	0.42301	1.35285	15.8323	16.1588	-1.25395	1.25395	58343.3	73159.7	-1.25395	58343.3	73159.7	-1.25395	-14816.4	-13.8549
511.2089@4.2179995	3	3	2.68828	1.5669	15.8464	18.1974	-5.102	5.102	58916.2	300590	-5.102	58916.2	300590	-5.102	-241674	-17.8827
641.2431@4.563	3	3	1.48659	0.954599	15.5494	16.1541	-1.52071	1.52071	47955.1	72925.6	-1.52071	47955.1	72925.6	-1.52071	-24970.5	-14.6079
825.1187@5.633	3	3	4.19902	2.84889	16.1731	15.0846	2.12652	2.12652	73889.4	34746.7	2.12652	73889.4	34746.7	2.12652	39142.8	15.2565
1028.4845@4.3909993	3	3	4.06089	2.2616	17.2114	18.6603	-2.73009	2.73009	151753	414300	-2.73009	151753	414300	-2.73009	-262546	-18.0022
964.302@1.7089998	3	3	3.01996	2.49913	16.759	17.5398	-1.71817	1.71817	110905	190554	-1.71817	110905	190554	-1.71817	-79648.6	-16.2814
337.1475@4.3209996	3	3	0.252191	1.54854	16.8532	17.1698	-1.2454	1.2454	118387	147439	-1.2454	118387	147439	-1.2454	-29051.8	-14.8263
734.1954@3.195	3	3	2.7388	1.74342	18.2097	17.4129	1.73719	1.73719	303152	174507	1.73719	303152	174507	1.73719	128644	16.973
521.2393@1.7029998	3	3	2.55312	1.87101	15.8863	16.5089	-1.53958	1.53958	60570.1	93252.6	-1.53958	60570.1	93252.6	-1.53958	-32682.5	-14.9962
1680.5007@3.8569999	3	3	3.86954	2.76574	15.5069	17.0625	-2.93946	2.93946	46563.2	136871	-2.93946	46563.2	136871	-2.93946	-90307.4	-16.4626
472.2516@5.389	3	3		2.23041	15.5361	0	47514.3	47514.3	47514.3	1	47514.3	47514.3	1	47514.3	47513.3	15.536
862.2253@1.6959999	3	3	1.07992	2.98061	16.5807	17.34	-1.6927	1.6927	98010.7	165902	-1.6927	98010.7	165902	-1.6927	-67891.7	-16.0509
607.3307@4.777	3	3	3.47116	1.26773	16.643	15.6327	2.01422	2.01422	102337	50807	2.01422	102337	50807	2.01422	51529.5	15.6531
258.1009@5.397	3	3	1.12268	0.830566	16.403	18.0536	-3.13953	3.13953	86655.8	272059	-3.13953	86655.8	272059	-3.13953	-185403	-17.5003
2392.8406@0.926	3	3	0.994143	2.94434	15.1501	16.1535	-2.00476	2.00476	36361.1	72895.4	-2.00476	36361.1	72895.4	-2.00476	-36534.3	-15.157
2967.988@0.9099999	3	3	0.9794	2.44415	16.2785	17.2063	-1.9024	1.9024	79489.6	151221	-1.9024	79489.6	151221	-1.9024	-71731.2	-16.1303
1649.332@0.91300005	3	3	0.319545	2.5798	17.8969	18.8742	-1.96876	1.96876	244068	480510	-1.96876	244068	480510	-1.96876	-236443	-17.8511
1247.8192@4.9570003	3	3	5.87703	0.385142	16.7775	15.2652	2.85268	2.85268	112337	39379.4	2.85268	112337	39379.4	2.85268	72957.3	16.1548
406.2046@4.562	3	3	2.26488	1.41665	15.1891	15.6887	-1.41384	1.41384	37356.4	52816.1	-1.41384	37356.4	52816.1	-1.41384	-15459.6	-13.9162
532.3201@4.3909993	3	3	1.51086	173.205	5.16484	15.4066	-1210.79	1210.79	35.8733	43435	-1210.79	35.8733	43435	-1210.79	-43399.1	-15.4054
259.1777@5.2760005	3	3	4.15232	2.98	15.6428	14.6599	1.97632	1.97632	51161.3	25887.1	1.97632	51161.3	25887.1	1.97632	25274.2	14.6254
449.7948@1.071	3	3	0.42946	0.396218	15.0333	15.3533	-1.24835	1.24835	33533	41860.8	-1.24835	33533	41860.8	-1.24835	-8327.8	-13.0237
806.3883@4.035	3	3	0.926614	2.82445	16.2542	16.8941	-1.55829	1.55829	78162.1	121799	-1.55829	78162.1	121799	-1.55829	-43636.7	-15.4133
1649.7316@7.6979985	3	3	1.70056	8.0999	14.6131	16.393	-3.43392	3.43392	25060.3	86055.1	-3.43392	25060.3	86055.1	-3.43392	-60994.8	-15.8964
1558.5085@5.645	3	3	0.912274	1.80939	18.0602	17.4554	1.5208	1.5208	273319	179721	1.5208	273319	179721	1.5208	93598.8	16.5142
501.3148@4.0569997	3	3	2.7407	4.30857	17.0245	15.4291	3.02186	3.02186	133320	44118.5	3.02186	133320	44118.5	3.02186	89201.2	16.4448
849.5422@4.6720004	3	3	2.77323	1.02821	16.023	15.4887	1.44819	1.44819	66588.2	45980.3	1.44819	66588.2	45980.3	1.44819	20607.9	14.3309
350.1567@4.402	3	3	0.56764	2.27612	15.4693	15.9234	-1.36991	1.36991	45366.4	62147.7	-1.36991	45366.4	62147.7	-1.36991	-16781.3	-14.0346
341.1942@5.235	3	3	0.835245	0.346316	17.6475	17.1413	1.42032	1.42032	205313	144554	1.42032	205313	144554	1.42032	60759.1	15.8908
421.7978@16.528	3	3	0.706634	1.95267	17.465	18.7923	-2.5093	2.5093	180923	453992	-2.5093	180923	453992	-2.5093	-273068	-18.0589
617.382@4.6679997	3	3	13.5878	0.50579	19.5905	16.8733	6.57625	6.57625	789482	120050	6.57625	789482	120050	6.57625	669432	19.3526
312.1917@5.3419995	3	3	173.205	5.22215	16.7333	5.55841	2312.01	2312.01	108953	47.1246	2312.01	108953	47.1246	2312.01	108906	16.7327
332.1729@5.937	3	3	0.269334	3.46272	15.739	14.81	1.90399	1.90399	54692.1	28725	1.90399	54692.1	28725	1.90399	25967.1	14.6644
602.1685@3.1690001	3	3	0.0708633	0.746425	24.5994	24.9958	-1.31623	1.31623	25419024	33457200	-1.31623	25419024	33457200	-1.31623	-8038176	-22.9384
324.1203@4.4319997	3	3	1.39498	0.732878	17.738	17.2061	1.44586	1.44586	218609	151197	1.44586	218609	151197	1.44586	67412.2	16.0407
571.1044@0.9940001	3	3	0.528955	0.757747	16.1754	16.7475	-1.48671	1.48671	74006.5	110026	-1.48671	74006.5	110026	-1.48671	-36019.3	-15.1365
356.0733@4.111	3	3	0.386449	1.25647	15.7054	16.0025	-1.22863	1.22863	53431.7	65647.7	-1.22863	53431.7	65647.7	-1.22863	-12216	-13.5765
1354.8748@0.9110002	3	3	0.778828	1.41994	16.571	17.3497	-1.71562	1.71562	97356.6	167027	-1.71562	97356.6	167027	-1.71562	-69670.4	-16.0883
1458.0986@0.92799985	3	3	0.682993	1.19523	16.4897	16.8323	-1.26807	1.26807	92023.4	116692	-1.26807	92023.4	116692	-1.26807	-24668.4	-14.5904
603.6743@3.1819994	3	3	1.13656	1.91186	15.7723	16.1794	-1.32597	1.32597	55969.3	74213.7	-1.32597	55969.3	74213.7	-1.32597	-18244.3	-14.1552
1091.3717@1.691	3	3	0.534211	1.74965	17.5424	17.0503	1.40654	1.40654	190895	135719	1.40654	190895	135719	1.40654	55175.8	15.7517
512.0842@4.4010005	3	3	1.69553	0.859771	15.5637	15.9642	-1.31999	1.31999	48432.2	63930.1	-1.31999	48432.2	63930.1	-1.31999	-15497.8	-13.9198
113.9616@1.0179999	3	3	2.54087	3.6298	14.9101	14.1883	1.64918	1.64918	30788.2	18668.8	1.64918	30788.2	18668.8	1.64918	12119.4	13.565
445.0485@4.4980006	3	3	2.21032	1.17447	16.126	14.9906	2.19678	2.19678	71516.3	32555	2.19678	71516.3	32555	2.19678	38961.3	15.2498
1596.4669@5.675999	3	3	2.4903	2.361	16.6668	15.7197	1.92792	1.92792	104038	53964.2	1.92792	104038	53964.2	1.92792	50074.3	15.6118
2846.2727@0.93599993	3	3	1.04458	1.63914	17.0315	17.5311	-1.41378	1.41378	133967	189400	-1.41378	133967	189400	-1.41378	-55432.9	-15.7585
237.0998@4.9910007	3	3	2.04993	2.14937	14.8622	15.4736	-1.52772	1.52772	29783	45500	-1.52772	29783	45500	-1.52772	-15717	-13.94
989.2982@4.2519994	3	3	8.13582		0	14.6979	-26577.2	26577.2	1	26577.2	-26577.2	1	26577.2	-26577.2	-26576.2	-14.6978
757.2239@1.2419999	3	3	0.732393	1.59629	17.1819	16.783	1.31847	1.31847	148685	112771	1.31847	148685	112771	1.31847	35913.9	15.1323
810.3753@5.3489995	3	3	1.93179	0.505426	15.5425	16.0771	-1.44856	1.44856	47724.8	69132.4	-1.44856	47724.8	69132.4	-1.44856	-21407.5	-14.3858
2294.1082@5.848	3	3	0.607778	1.12238	16.3143	16.8584	-1.45811	1.45811	81487.6	118818	-1.45811	81487.6	118818	-1.45811	-37330.2	-15.1881
496.0063@1.335	3	3	0.198642	0.476381	16.0728	15.9041	1.12405	1.12405	68926.6	61319.8	1.12405	68926.6	61319.8	1.12405	7606.8	12.8931
122.0365@5.173	3	3	0.751838	0.302751	16.0861	15.8848	1.14973	1.14973	69566.5	60506.9	1.14973	69566.5	60506.9	1.14973	9059.64	13.1452
372.1638@1.212	3	3	1.1032	0.607474	16.3451	16.6038	-1.19643	1.19643	83245.4	99597.4	-1.19643	83245.4	99597.4	-1.19643	-16352	-13.9972
369.054@4.0089993	3	3	0.581311	7.89353	15.754	17.1628	-2.65516	2.65516	55262.4	146731	-2.65516	55262.4	146731	-2.65516	-91468.1	-16.481
1113.3254@1.243	3	3	0.56228	0.988944	16.0561	16.3688	-1.24201	1.24201	68135.2	84624.6	-1.24201	68135.2	84624.6	-1.24201	-16489.4	-14.0093
1667.6274@3.5680006	3	3	1.24174	1.19431	15.2297	15.7597	-1.44398	1.44398	38422.6	55481.5	-1.44398	38422.6	55481.5	-1.44398	-17058.9	-14.0582
906.1206@0.9969998	3	3	2.04438	0.321856	15.5105	16.0445	-1.44801	1.44801	46678.2	67590.2	-1.44801	46678.2	67590.2	-1.44801	-20912.1	-14.352
569.8354@1.0489999	3	3	1.51137	0.531454	16.2942	15.9612	1.25964	1.25964	80363.3	63798.4	1.25964	80363.3	63798.4	1.25964	16564.9	14.0158
675.2858@4.8520007	3	3	0.167851	173.205	4.26372	14.7175	-1402.46	1402.46	19.2091	26940	-1402.46	19.2091	26940	-1402.46	-26920.8	-14.7164
174.125@5.194	3	3	0.505106	2.01995	16.7183	17.2989	-1.49548	1.49548	107823	161248	-1.49548	107823	161248	-1.49548	-53424.4	-15.7052
328.0575@5.7399993	3	3	1.9211	0.495079	15.3837	14.6757	1.63351	1.63351	42751.1	26171.3	1.63351	42751.1	26171.3	1.63351	16579.8	14.0171
549.7311@16.434002	3	3	0.730824	0.546007	16.6639	16.8731	-1.15603	1.15603	103835	120037	-1.15603	103835	120037	-1.15603	-16201.6	-13.9838
2741.1946@5.285	3	3	0.115489	3.25285	15.5277	16.5951	-2.09564	2.09564	47239.6	98997.2	-2.09564	47239.6	98997.2	-2.09564	-51757.6	-15.6595
925.4381@4.485	3	3	2.26022	3.10266	16.9391	17.886	-1.92777	1.92777	125655	242234	-1.92777	125655	242234	-1.92777	-116579	-16.8309
632.3729@3.576	3	3	0.860533	3.71237	15.6303	16.3368	-1.63191	1.63191	50719.5	82769.8	-1.63191	50719.5	82769.8	-1.63191	-32050.3	-14.968
760.7341@1.165	3	3	0.200896	3.46893	15.9701	16.9202	-1.93203	1.93203	64190.7	124018	-1.93203	64190.7	124018	-1.93203	-59827.5	-15.8685
874.5752@4.7960005	3	3	1.34434	1.26287	15.3572	14.9834	1.29577	1.29577	41975.1	32393.9	1.29577	41975.1	32393.9	1.29577	9581.26	13.226
951.1041@4.9479995	3	3	0.299716	0.961613	16.6312	16.4081	1.16719	1.16719	101505	86965.1	1.16719	101505	86965.1	1.16719	14539.6	13.8277
214.8805@16.479002	3	3	0.831678	1.9481	17.9129	17.2342	1.60065	1.60065	246781	154176	1.60065	246781	154176	1.60065	92605.2	16.4988
938.072@1.3619999	3	3	1.2824	0.462603	17.2816	16.8303	1.36725	1.36725	159327	116531	1.36725	159327	116531	1.36725	42796.3	15.3852
473.211@3.1499999	3	3	13.5582	1.24439	16.6075	13.4667	8.81988	8.81988	99850.9	11321.1	8.81988	99850.9	11321.1	8.81988	88529.8	16.4339
547.7468@16.433	3	3	0.755325	0.981643	16.8312	17.1361	-1.23537	1.23537	116599	144044	-1.23537	116599	144044	-1.23537	-27444.2	-14.7442
1553.7961@5.6409993	3	3	0.943098	5.52644	15.5973	16.7646	-2.24587	2.24587	49575.7	111340	-2.24587	49575.7	111340	-2.24587	-61764.7	-15.9145
2098.525@1.7250003	3	3	0.746701	13.5773	13.4837	16.3071	-7.07797	7.07797	11455.3	81080.2	-7.07797	11455.3	81080.2	-7.07797	-69624.9	-16.0873
677.9256@5.0019994	3	3	1.58232	2.5181	15.8852	15.0952	1.72916	1.72916	60525.2	35002.7	1.72916	60525.2	35002.7	1.72916	25522.5	14.6395
1249.8763@0.9320001	3	3	0.85912	1.58736	16.4869	17.3883	-1.8678	1.8678	91846.5	171550	-1.8678	91846.5	171550	-1.8678	-79704	-16.2824
368.1861@5.7070003	3	3	173.205	6.84769	15.3097	4.78004	1478.23	1478.23	40614.3	27.4749	1478.23	40614.3	27.4749	1478.23	40586.8	15.3087
3057.6675@0.91300005	3	3	0.287746	1.65618	16.828	17.3282	-1.41439	1.41439	116339	164549	-1.41439	116339	164549	-1.41439	-48210	-15.557
2798.2463@0.926	3	3	1.8243	6.15304	14.8354	16.1598	-2.50429	2.50429	29234.5	73211.8	-2.50429	29234.5	73211.8	-2.50429	-43977.3	-15.4245
881.358@4.6360006	3	3	3.57031	1.81579	16.2863	17.0505	-1.69837	1.69837	79924.2	135741	-1.69837	79924.2	135741	-1.69837	-55816.8	-15.7684
390.1727@1.6280001	3	3	2.11808	1.75768	14.9781	15.9783	-2.00036	2.00036	32273.3	64558.1	-2.00036	32273.3	64558.1	-2.00036	-32284.8	-14.9786
550.1198@1.2340001	3	3	0.158507	3.76369	15.8202	17.004	-2.27161	2.27161	57858.8	131433	-2.27161	57858.8	131433	-2.27161	-73574	-16.1669
3060.2532@0.922	3	3	0.505181	1.55357	16.0884	16.6869	-1.51414	1.51414	69677.1	105501	-1.51414	69677.1	105501	-1.51414	-35824.1	-15.1286
776.8684@4.993	3	3	1.21748	3.48878	14.7558	15.9819	-2.33931	2.33931	27665	64717.1	-2.33931	27665	64717.1	-2.33931	-37052.1	-15.1773
654.3574@5.103	3	3	1.09043	1.88513	15.8161	16.7276	-1.88092	1.88092	57694.1	108518	-1.88092	57694.1	108518	-1.88092	-50823.9	-15.6332
2890.2244@0.92	3	3	0.628619	2.15143	15.897	16.6648	-1.70272	1.70272	61018.3	103897	-1.70272	61018.3	103897	-1.70272	-42878.7	-15.388
1005.2226@1.2340001	3	3	0.49291	0.650774	17.499	17.7413	-1.18286	1.18286	185232	219103	-1.18285	185232	219103	-1.18285	-33870.7	-15.0477
276.0563@5.216	3	3	0.159189	1.39427	15.6058	15.9117	-1.23621	1.23621	49866.5	61645.7	-1.23621	49866.5	61645.7	-1.23621	-11779.2	-13.524
536.7615@5.0439997	3	3	3.63221	1.76568	16.0036	16.7489	-1.67639	1.67639	65698.8	110137	-1.67639	65698.8	110137	-1.67639	-44438.3	-15.4395
587.7149@1.0629998	3	3	0.580297	1.0567	15.7707	16.0431	-1.20777	1.20777	55907.1	67523.1	-1.20777	55907.1	67523.1	-1.20777	-11615.9	-13.5038
2555.5486@0.922	3	3	1.23225	3.25169	15.1798	16.6532	-2.77674	2.77674	37116.2	103062	-2.77674	37116.2	103062	-2.77674	-65945.7	-16.009
1549.3185@0.9320001	3	3	0.719872	1.29702	17.3733	17.883	-1.4238	1.4238	169777	241728	-1.4238	169777	241728	-1.4238	-71951.3	-16.1347
367.147@1.6239998	3	3	1.85914	2.40225	16.8855	16.0966	1.72776	1.72776	121070	70073.4	1.72776	121070	70073.4	1.72776	50996.5	15.6381
1632.4574@5.456001	3	3	3.30629	1.02995	16.7196	15.5878	2.19134	2.19134	107920	49248.2	2.19134	107920	49248.2	2.19134	58671.3	15.8404
2307.161@5.154	3	3	1.41373	3.84664	15.2292	16.3969	-2.24654	2.24654	38410.5	86290.8	-2.24654	38410.5	86290.8	-2.24654	-47880.3	-15.5471
1439.7478@0.9110002	3	3	0.623499	1.23217	17.3448	17.8102	-1.38071	1.38071	166453	229822	-1.38071	166453	229822	-1.38071	-63369.5	-15.9515
322.1157@4.619	3	3	2.14463	1.69059	16.4819	15.7929	1.61223	1.61223	91528.1	56771.1	1.61223	91528.1	56771.1	1.61223	34757	15.085
624.1255@1.3269999	3	3	3.65167	8.08967	15.1315	16.9988	-3.64842	3.64842	35894.8	130960	-3.64842	35894.8	130960	-3.64842	-95064.8	-16.5366
1550.6469@3.4269998	3	3	0.757681	2.14279	16.5114	15.9772	1.44815	1.44815	93416.2	64507.4	1.44815	93416.2	64507.4	1.44815	28908.8	14.8192
328.1902@3.822	3	3	4.92377	3.82776	14.4221	15.7089	-2.43983	2.43983	21953	53561.7	-2.43983	21953	53561.7	-2.43983	-31608.7	-14.948
160.1094@5.6490006	3	3	1.75387	1.72214	15.5661	15.1215	1.36085	1.36085	48511.9	35648.1	1.36085	48511.9	35648.1	1.36085	12863.8	13.651
2406.513@0.91300005	3	3	0.231739	3.18551	14.9562	16.3969	-2.71453	2.71453	31787.3	86287.6	-2.71453	31787.3	86287.6	-2.71453	-54500.3	-15.734
662.1368@5.2459993	3	3	3.30168	2.96749	15.5712	14.6799	1.85488	1.85488	48685.3	26247	1.85488	48685.3	26247	1.85488	22438.2	14.4537
565.7345@16.442999	3	3	0.195763	1.47109	17.2053	17.5235	-1.24676	1.24676	151116	188406	-1.24676	151116	188406	-1.24676	-37290.1	-15.1865
1170.7979@5.034	3	3	0.97299	1.65984	16.819	16.3749	1.36047	1.36047	115614	84980.9	1.36047	115614	84980.9	1.36047	30632.9	14.9028
1595.4039@1.2539998	3	3	0.604486	6.07095	16.0016	17.2841	-2.43249	2.43249	65609.9	159595	-2.43249	65609.9	159595	-2.43249	-93985.5	-16.5202
522.172@3.8440003	3	3	1.40514	2.18453	16.723	16.0275	1.61946	1.61946	108175	66797	1.61946	108175	66797	1.61946	41378.1	15.3366
358.1352@4.5569997	3	3		5.94482	16.716	0	107653	107653	107653	1	107653	107653	1	107653	107652	16.716
150.0314@5.0019994	3	3	3.43031	1.63418	15.2596	14.6338	1.54301	1.54301	39226.8	25422.2	1.54301	39226.8	25422.2	1.54301	13804.5	13.7529
451.2694@8.086999	3	3	3.76257	3.3156	14.3118	15.4988	-2.27678	2.27678	20337.3	46303.6	-2.27678	20337.3	46303.6	-2.27678	-25966.3	-14.6644
1498.6475@5.8919997	3	3	0.991107	0.857373	16.481	16.1212	1.28321	1.28321	91466.7	71279.7	1.28321	91466.7	71279.7	1.28321	20187	14.3011
563.1267@3.3840003	3	3	0.745411	1.42148	15.7721	16.2677	-1.40989	1.40989	55959.1	78896.3	-1.40989	55959.1	78896.3	-1.40989	-22937.2	-14.4854
331.0686@5.8489995	3	3	1.06109	4.94693	15.5391	14.6468	1.85609	1.85609	47613	25652.3	1.85609	47613	25652.3	1.85609	21960.7	14.4226
2990.2112@0.934	3	3	0.575185	3.56644	16.2872	17.2608	-1.96372	1.96372	79973	157045	-1.96372	79973	157045	-1.96372	-77071.6	-16.2339
620.4283@10.296999	3	3	86.8821		0	7.55681	-188.29	188.29	1	188.29	-188.29	1	188.29	-188.29	-187.29	-7.54913
664.2245@4.839	3	3	1.81927	2.21328	14.5928	15.1691	-1.49097	1.49097	24709.9	36841.7	-1.49097	24709.9	36841.7	-1.49097	-12131.9	-13.5665
661.4067@4.6689997	3	3	0.351152	0.286756	16.2922	16.1406	1.1108	1.1108	80249.6	72245.1	1.1108	80249.6	72245.1	1.1108	8004.48	12.9666
1860.8569@5.034	3	3	2.14889	2.25505	15.542	16.3024	-1.69387	1.69387	47710.8	80815.9	-1.69387	47710.8	80815.9	-1.69387	-33105.1	-15.0148
1033.4698@4.6139994	3	3	5.20774	3.56337	15.5574	17.1992	-3.12058	3.12058	48222.4	150482	-3.12058	48222.4	150482	-3.12058	-102259	-16.6419
490.0701@1.0389999	3	3	1.4593	1.62482	14.9628	15.5848	-1.53893	1.53893	31934.8	49145.2	-1.53893	31934.8	49145.2	-1.53893	-17210.5	-14.071
312.1389@6.252999	3	3	173.205	5.89824	15.1721	5.16075	1032.08	1032.08	36919.2	35.7717	1032.08	36919.2	35.7717	1032.08	36883.4	15.1707
308.1369@4.603	3	3	0.78595	0.939679	17.8029	17.023	1.717	1.717	228674	133183	1.717	228674	133183	1.717	95491.7	16.5431
267.1059@3.6030004	3	3	2.73464	2.67895	14.3454	15.0905	-1.6761	1.6761	20815.4	34888.8	-1.6761	20815.4	34888.8	-1.6761	-14073.4	-13.7807
493.002@1.351	3	3	1.23113	0.740296	16.6112	16.0083	1.51881	1.51881	100110	65913.7	1.51881	100110	65913.7	1.51881	34196.4	15.0616
723.246@3.107	3	3	0.503711	2.99358	16.9356	17.5278	-1.50749	1.50749	125352	188967	-1.50749	125352	188967	-1.50749	-63614.5	-15.9571
657.6663@1.0760001	3	3	1.18347	0.820977	15.3403	15.7198	-1.30091	1.30091	41484.2	53967.3	-1.30091	41484.2	53967.3	-1.30091	-12483.1	-13.6077
1358.6157@0.926	3	3	0.858449	5.31724	15.8601	17.0774	-2.32508	2.32508	59480.7	138297	-2.32508	59480.7	138297	-2.32508	-78816.6	-16.2662
406.0886@4.5639997	3	3	0.432673	1.48705	15.6903	14.3856	2.47028	2.47028	52874.9	21404.4	2.47028	52874.9	21404.4	2.47028	31470.4	14.9417
422.1521@1.6079999	3	3	0.192197	1.97204	16.3236	16.9212	-1.51311	1.51311	82017.2	124101	-1.51311	82017.2	124101	-1.51311	-42083.5	-15.361
3337.654@0.92399985	3	3	0.396408	2.71654	15.4452	16.9831	-2.90382	2.90382	44613.5	129550	-2.90382	44613.5	129550	-2.90382	-84936.2	-16.3741
459.9397@5.9759994	3	3	1.88738	2.7009	16.6045	15.1489	2.74269	2.74269	99646.2	36331.6	2.74269	99646.2	36331.6	2.74269	63314.6	15.9503
1277.7769@0.922	3	3	1.45666	2.31237	15.7895	16.9631	-2.25577	2.25577	56638.7	127764	-2.25577	56638.7	127764	-2.25577	-71125.2	-16.1181
425.8495@16.453999	3	3	0.523181	1.48642	15.8132	16.2174	-1.32332	1.32332	57578.4	76194.9	-1.32332	57578.4	76194.9	-1.32332	-18616.5	-14.1843
1063.5879@4.874	3	3	1.17217	2.11103	21.2923	20.4364	1.80992	1.80992	2.56814e+06	1.41892e+06	1.80992	2.56814e+06	1.41892e+06	1.80992	1.14921e+06	20.1322
599.7064@1.073	3	3	0.890942	0.419235	16.0899	15.8675	1.16672	1.16672	69751.3	59784.2	1.16672	69751.3	59784.2	1.16672	9967.11	13.283
915.4142@4.1339993	3	3	4.7055	173.205	5.39049	16.8677	-2850.99	2850.99	41.9468	119590	-2850.99	41.9468	119590	-2850.99	-119548	-16.8672
1045.4886@4.4130006	3	3	2.99657	1.96401	16.0509	16.8492	-1.73909	1.73909	67888.6	118064	-1.73909	67888.6	118064	-1.73909	-50175.8	-15.6147
674.2499@3.1860006	3	3		86.6028	10.3905	0	1342.3	1342.3	1342.3	1	1342.3	1342.3	1	1342.3	1341.3	10.3894
2597.2551@5.960999	3	3	1.73458	3.19439	15.25	15.9969	-1.67817	1.67817	38968.3	65395.7	-1.67817	38968.3	65395.7	-1.67817	-26427.3	-14.6897
807.3307@4.7029996	3	3	1.3792	0.59213	15.3406	16.0369	-1.6204	1.6204	41493.1	67235.5	-1.6204	41493.1	67235.5	-1.6204	-25742.4	-14.6519
1079.44@4.577	3	3	2.67128	173.205	4.22326	16.4601	-4826.65	4826.65	18.6778	90151.4	-4826.65	18.6778	90151.4	-4826.65	-90132.7	-16.4598
1308.7917@4.8930006	3	3	0.629616	0.281939	17.0746	16.8659	1.15565	1.15565	138025	119434	1.15565	138025	119434	1.15565	18590.3	14.1823
1264.2921@0.923	3	3	1.08694	3.00421	16.7572	17.911	-2.22508	2.22508	110768	246468	-2.22508	110768	246468	-2.22508	-135700	-17.0501
2321.8806@0.92399985	3	3	1.32943	3.82318	15.6722	16.4781	-1.74821	1.74821	52217.4	91286.9	-1.74821	52217.4	91286.9	-1.74821	-39069.5	-15.2538
1350.6887@0.922	3	3	0.135706	1.06842	16.7157	17.0241	-1.23833	1.23833	107630	133282	-1.23833	107630	133282	-1.23833	-25652	-14.6468
465.8252@16.528997	3	3	0.512176	1.33661	16.7498	17.1306	-1.30212	1.30212	110200	143494	-1.30212	110200	143494	-1.30212	-33293.6	-15.023
942.0605@16.379	3	3	3.0867	1.62474	15.484	17.2942	-3.50709	3.50709	45829.1	160727	-3.50709	45829.1	160727	-3.50709	-114897	-16.81
1395.5009@0.9209999	3	3	0.544736	2.11881	16.1735	16.839	-1.58608	1.58608	73913.2	117232	-1.58608	73913.2	117232	-1.58608	-43318.8	-15.4027
2860.6116@0.92399985	3	3	0.797338	2.03869	17.0936	17.5727	-1.3939	1.3939	139854	194942	-1.3939	139854	194942	-1.3939	-55088.2	-15.7495
3183.1262@0.90699995	3	3	0.348688	2.83285	15.8931	16.7839	-1.85417	1.85417	60857	112839	-1.85417	60857	112839	-1.85417	-51982.4	-15.6657
360.8533@16.432001	3	3	0.778581	0.626573	15.8692	16.3106	-1.35792	1.35792	59854.6	81278	-1.35792	59854.6	81278	-1.35792	-21423.4	-14.3869
1484.9229@0.922	3	3	0.36483	2.25047	16.2135	16.8484	-1.55286	1.55286	75987.8	117998	-1.55286	75987.8	117998	-1.55286	-42010.5	-15.3585
1003.3152@3.4970002	3	3	0.552012	1.08443	16.238	16.4956	-1.19548	1.19548	77289.5	92398.2	-1.19548	77289.5	92398.2	-1.19548	-15108.6	-13.8831
1167.498@3.9630003	3	3	4.80367	2.51022	15.0919	16.8234	-3.32079	3.32079	34923.5	115974	-3.32079	34923.5	115974	-3.32079	-81050.2	-16.3065
1053.661@4.8720007	3	3	1.14492	0.499373	16.4899	16.2321	1.19567	1.19567	92033.5	76972.6	1.19567	92033.5	76972.6	1.19567	15060.9	13.8785
432.2289@5.3320003	3	3	0.238622	1.05807	15.8049	16.5241	-1.64624	1.64624	57246.8	94242	-1.64624	57246.8	94242	-1.64624	-36995.2	-15.175
1205.0385@3.1690001	3	3	0.393852	2.00801	16.0881	16.4699	-1.30295	1.30295	69661	90765.1	-1.30295	69661	90765.1	-1.30295	-21104.1	-14.3652
1401.4077@3.3639998	3	3	0.312994	1.27086	16.4561	16.8494	-1.31339	1.31339	89905	118080	-1.31339	89905	118080	-1.31339	-28175	-14.7821
1438.6263@5.3009996	3	3	4.10441	6.55713	14.2605	15.5835	-2.5018	2.5018	19626.7	49102.2	-2.5018	19626.7	49102.2	-2.5018	-29475.4	-14.8472
456.2387@7.511001	3	3	173.205	5.32585	13.9021	4.63412	616.504	616.504	15309	24.8319	616.504	15309	24.8319	616.504	15284.2	13.8997
1154.6906@4.8079996	3	3	3.71267	173.205	5.30692	16.1909	-1889.73	1889.73	39.5861	74807	-1889.73	39.5861	74807	-1889.73	-74767.4	-16.1901
587.7126@16.453001	3	3	0.26632	1.43235	17.0822	17.3893	-1.23727	1.23727	138753	171675	-1.23727	138753	171675	-1.23727	-32921.9	-15.0068
2771.944@0.9320001	3	3	1.18114	3.79053	15.3682	16.8496	-2.7922	2.7922	42294.7	118095	-2.7922	42294.7	118095	-2.7922	-75800.3	-16.2099
3135.6895@0.922	3	3	0.714483	2.72777	16.3242	17.1705	-1.79795	1.79795	82047.8	147518	-1.79795	82047.8	147518	-1.79795	-65470.3	-15.9986
350.8453@16.432001	3	3	0.517237	0.893483	15.2784	15.6971	-1.33668	1.33668	39743.7	53124.5	-1.33668	39743.7	53124.5	-1.33668	-13380.8	-13.7079
1258.0684@0.92799985	3	3	1.18845	0.821426	15.8684	16.3747	-1.42042	1.42042	59821.9	84972	-1.42042	59821.9	84972	-1.42042	-25150.2	-14.6183
192.9538@1.002	3	3	2.05771	1.20394	15.0323	15.5041	-1.3869	1.3869	33508.9	46473.7	-1.3869	33508.9	46473.7	-1.3869	-12964.8	-13.6623
145.0557@5.5610003	3	3	1.52013	1.57411	16.3071	15.8814	1.34318	1.34318	81080.2	60364.4	1.34318	81080.2	60364.4	1.34318	20715.8	14.3384
242.0985@5.257	3	3	1.94382	1.1663	16.1682	15.751	1.33535	1.33535	73641.2	55147.5	1.33535	73641.2	55147.5	1.33535	18493.8	14.1748
251.1156@3.808	3	3	173.205	2.4935	15.4861	4.79373	1654.74	1654.74	45897.5	27.7369	1654.74	45897.5	27.7369	1654.74	45869.7	15.4853
602.9242@3.1700003	3	3	0.419934	1.0513	14.9706	15.4414	-1.3859	1.3859	32106.7	44496.7	-1.3859	32106.7	44496.7	-1.3859	-12390	-13.5969
1350.9427@0.9049998	3	3	0.688533	1.89363	15.3157	16.1488	-1.78156	1.78156	40782.8	72656.9	-1.78156	40782.8	72656.9	-1.78156	-31874.2	-14.9601
264.1327@4.208	3	3	6.01688	11.9627	15.8944	13.5787	4.97848	4.97848	60909.6	12234.6	4.97848	60909.6	12234.6	4.97848	48675	15.5709
558.2632@3.968	3	3	4.06972	2.29209	17.9611	18.9216	-1.94599	1.94599	255165	496549	-1.94599	255165	496549	-1.94599	-241384	-17.881
3148.2832@0.934	3	3	1.0969	3.67442	15.6471	16.8352	-2.27855	2.27855	51315.2	116924	-2.27855	51315.2	116924	-2.27855	-65609.1	-16.0016
210.8725@16.453999	3	3	1.44625	1.28493	15.3602	15.7314	-1.29343	1.29343	42060.1	54401.8	-1.29343	42060.1	54401.8	-1.29343	-12341.6	-13.5912
602.6244@3.1590002	3	3	0.321933	2.09642	15.6049	16.4029	-1.73866	1.73866	49835.2	86646.4	-1.73866	49835.2	86646.4	-1.73866	-36811.2	-15.1679
1134.7225@4.7949996	3	3	0.585449	0.804928	16.5929	16.3298	1.20005	1.20005	98843.4	82366.3	1.20005	98843.4	82366.3	1.20005	16477.1	14.0082
358.2213@4.208	3	3	2.394	3.72083	14.864	15.826	-1.948	1.948	29820.7	58090.7	-1.948	29820.7	58090.7	-1.948	-28270	-14.787
2254.976@4.6720004	3	3	1.36927	173.205	5.34724	16.6569	-2538.4	2538.4	40.708	103333	-2538.4	40.708	103333	-2538.4	-103293	-16.6564
400.045@5.4529996	3	3	2.20899	0.866425	15.9838	15.5503	1.35055	1.35055	64804.8	47983.9	1.35055	64804.8	47983.9	1.35055	16820.9	14.038
385.2563@5.7190003	3	3	0.38425	2.22097	15.4141	16.2186	-1.74646	1.74646	43663.7	76256.9	-1.74646	43663.7	76256.9	-1.74646	-32593.2	-14.9923
297.0336@3.924	3	3	0.269787	0.785515	16.0112	15.4061	1.52103	1.52103	66045.3	43421.3	1.52103	66045.3	43421.3	1.52103	22624	14.4656
2681.5813@0.93900007	3	3	1.17099	2.07501	16.2801	17.1839	-1.871	1.871	79580.9	148896	-1.871	79580.9	148896	-1.871	-69314.8	-16.0809
172.0731@5.1350007	3	3	0.166306	1.27493	15.4317	16.8502	-2.67296	2.67296	44198.9	118142	-2.67296	44198.9	118142	-2.67296	-73943	-16.1741
1083.7172@4.8730006	3	3	0.55314	1.71889	17.4748	16.9704	1.41857	1.41857	182160	128411	1.41857	182160	128411	1.41857	53748.7	15.7139
2986.6626@0.92799985	3	3	1.04445	6.09458	15.1569	16.7237	-2.96251	2.96251	36532.3	108227	-2.96251	36532.3	108227	-2.96251	-71695.1	-16.1296
1566.8538@0.922	3	3	1.07864	1.59641	16.5561	17.2673	-1.63711	1.63711	96359.5	157751	-1.63711	96359.5	157751	-1.63711	-61391.6	-15.9058
1160.8768@4.902	3	3	2.80702	0.400648	17.3235	16.7565	1.48144	1.48144	164018	110715	1.48144	164018	110715	1.48144	53303	15.7019
733.1475@1.521	3	3	0.440316	0.191227	17.4951	17.6804	-1.13709	1.13709	184730	210055	-1.13709	184730	210055	-1.13709	-25325	-14.6283
866.1769@4.0470004	3	3	1.17861	0.983941	15.6983	16.1979	-1.41385	1.41385	53167.9	75171.6	-1.41385	53167.9	75171.6	-1.41385	-22003.7	-14.4255
325.0975@5.0869994	3	3	1.07956	0.235152	15.7175	15.9439	-1.16988	1.16988	53883.3	63036.8	-1.16988	53883.3	63036.8	-1.16988	-9153.59	-13.1601
633.3101@3.9290006	3	3	4.83754	2.008	16.5875	18.2238	-3.1087	3.1087	98476.6	306135	-3.1087	98476.6	306135	-3.1087	-207658	-17.6638
286.0665@3.2700002	3	3	4.85807	3.44046	15.4235	16.6752	-2.38126	2.38126	43946.4	104648	-2.38126	43946.4	104648	-2.38126	-60701.4	-15.8894
391.1228@1.618	3	3	5.61079	6.581	17.3057	14.8045	5.66169	5.66169	162012	28615.4	5.6617	162012	28615.4	5.6617	133396	17.0254
190.0625@4.4319997	3	3	0.700957	0.778204	15.8964	15.0422	1.80774	1.80774	60994.1	33740.5	1.80774	60994.1	33740.5	1.80774	27253.6	14.7342
855.7832@3.9550004	3	3	0.290976	3.00097	17.5389	18.565	-2.03648	2.03648	190434	387815	-2.03648	190434	387815	-2.03648	-197381	-17.5906
489.2779@3.5989993	3	3	2.17345	1.09113	15.8978	14.9101	1.98307	1.98307	61056.1	30788.7	1.98307	61056.1	30788.7	1.98307	30267.3	14.8855
1555.1012@0.922	3	3	0.0908232	0.685817	17.1765	17.6027	-1.34373	1.34373	148126	199042	-1.34373	148126	199042	-1.34373	-50915.7	-15.6358
595.2595@1.2229999	3	3	0.413874	0.744135	16.5577	16.3291	1.17167	1.17167	96461.7	82328.3	1.17167	96461.7	82328.3	1.17167	14133.4	13.7868
1245.8392@4.959	3	3	1.38314	2.06955	17.3972	16.891	1.42028	1.42028	172618	121538	1.42028	172618	121538	1.42028	51080.3	15.6405
1085.707@4.8730006	3	3	1.73965	0.393099	17.2596	16.666	1.50898	1.50898	156913	103986	1.50898	156913	103986	1.50898	52927.2	15.6917
108.0573@4.8289995	3	3	0.0776881	1.10416	19.395	19.6733	-1.2128	1.2128	689399	836103	-1.2128	689399	836103	-1.2128	-146704	-17.1625
173.0825@5.411999	3	3	1.73788	0.542793	14.8162	15.2805	-1.37965	1.37965	28847.6	39799.6	-1.37965	28847.6	39799.6	-1.37965	-10952.1	-13.4189
763.4101@5.502999	3	3	0.486992	0.702321	15.784	16.2227	-1.3554	1.3554	56423.8	76477	-1.3554	56423.8	76477	-1.3554	-20053.2	-14.2915
1488.5116@5.847	3	3	0.413642	0.39788	16.628	16.8066	-1.13175	1.13175	101282	114626	-1.13175	101282	114626	-1.13175	-13343.9	-13.7039
2662.1821@0.926	3	3	1.57923	1.74433	15.8496	16.544	-1.61822	1.61822	59046	95549.1	-1.61822	59046	95549.1	-1.61822	-36503.1	-15.1557
3395.6719@0.94200003	3	3	0.168117	1.10563	16.901	17.3927	-1.40612	1.40612	122375	172074	-1.40612	122375	172074	-1.40612	-49698.8	-15.6009
448.3032@12.291	3	3	1.4168	1.10018	15.5296	16.2045	-1.59649	1.59649	47301.7	75516.6	-1.59649	47301.7	75516.6	-1.59649	-28214.8	-14.7842
168.1071@5.32	3	3	1.74388	1.99392	15.5159	14.7131	1.74451	1.74451	46853.5	26857.8	1.74451	46853.5	26857.8	1.74451	19995.8	14.2874
1624.0167@0.9429999	3	3	0.0735731	3.28295	16.0616	16.7895	-1.65621	1.65621	68397.1	113280	-1.65621	68397.1	113280	-1.65621	-44882.9	-15.4539
1266.2433@1.3029999	3	3	4.61222	1.43403	18.3687	16.9814	2.61592	2.61592	338473	129390	2.61592	338473	129390	2.61592	209083	17.6737
1339.5557@4.8180003	3	3	1.72773	2.67842	14.8126	15.4471	-1.5523	1.5523	28777.4	44671.1	-1.5523	28777.4	44671.1	-1.5523	-15893.7	-13.9562
820.2096@1.255	3	3	1.71295	2.59672	16.5789	17.4035	-1.77102	1.77102	97889.9	173365	-1.77102	97889.9	173365	-1.77102	-75474.9	-16.2037
775.8169@3.3740003	3	3	1.23816	2.7091	16.5346	15.7885	1.67726	1.67726	94930.9	56598.6	1.67726	94930.9	56598.6	1.67726	38332.2	15.2263
1566.4905@5.657001	3	3	2.5384	0.666453	17.7561	17.0586	1.62169	1.62169	221366	136503	1.62169	221366	136503	1.62169	84862.9	16.3728
365.2053@3.4620001	3	3	0.160531	0.164415	16.1464	15.9068	1.18069	1.18069	72537.8	61436.6	1.18069	72537.8	61436.6	1.18069	11101.2	13.4384
1642.4941@5.7190003	3	3	0.954532	1.64971	16.0228	15.5814	1.35787	1.35787	66578.3	49031.5	1.35787	66578.3	49031.5	1.35787	17546.8	14.0989
954.5461@4.8279996	3	3	1.61618	0.299401	16.1979	15.5155	1.60489	1.60489	75174	46840.5	1.60489	75174	46840.5	1.60489	28333.5	14.7902
615.7858@4.9809995	3	3	0.490521	1.90332	16.0972	16.5046	-1.32631	1.32631	70104.3	92980	-1.32631	70104.3	92980	-1.32631	-22875.7	-14.4815
2948.0117@0.9209999	3	3	2.44619	1.49327	15.4122	16.1141	-1.62663	1.62663	43606.3	70931.4	-1.62663	43606.3	70931.4	-1.62663	-27325.2	-14.7379
1355.1174@0.923	3	3	1.03826	1.75756	16.565	17.1703	-1.52132	1.52132	96952.4	147495	-1.52132	96952.4	147495	-1.52132	-50543	-15.6252
434.192@4.5670004	3	3	3.99603		0	15.8787	-60250.5	60250.5	1	60250.5	-60250.5	1	60250.5	-60250.5	-60249.5	-15.8787
802.1373@6.501	3	3	4.28101	1.0963	15.2621	14.0104	2.38132	2.38132	39297.4	16502.3	2.38132	39297.4	16502.3	2.38132	22795	14.4764
649.3281@4.4220004	3	3	1.78613	5.12213	15.2358	16.4473	-2.31587	2.31587	38585.9	89359.9	-2.31587	38585.9	89359.9	-2.31587	-50774	-15.6318
1503.1093@0.9320001	3	3	0.395938	0.973548	17.18	17.6682	-1.40276	1.40276	148487	208292	-1.40276	148487	208292	-1.40276	-59804.8	-15.868
1003.7601@4.875	3	3	2.47574	0.557544	15.4685	14.8098	1.57869	1.57869	45339.8	28720	1.57869	45339.8	28720	1.57869	16619.9	14.0206
2484.9734@4.028	3	3	0.470549	1.20578	16.445	16.1752	1.2056	1.2056	89214.1	73999.8	1.2056	89214.1	73999.8	1.2056	15214.3	13.8931
657.2574@10.513	3	3	4.37843	1.17387	15.942	15.1485	1.73322	1.73322	62953.4	36321.7	1.73322	62953.4	36321.7	1.73322	26631.7	14.7009
1277.9385@7.292	3	3	0.367694	0.917672	16.8828	17.1845	-1.23262	1.23262	120844	148955	-1.23262	120844	148955	-1.23262	-28111	-14.7788
2867.2861@4.839	3	3	0.375277	9.38376	13.8456	16.0643	-4.65445	4.65445	14721.6	68520.9	-4.65445	14721.6	68520.9	-4.65445	-53799.3	-15.7153
561.7411@16.445002	3	3	1.15961	0.986942	16.9365	17.3421	-1.32463	1.32463	125432	166151	-1.32463	125432	166151	-1.32463	-40719.3	-15.3134
3103.1785@0.9320001	3	3	0.163736	1.55342	16.3763	16.8725	-1.41048	1.41048	85066.8	119985	-1.41048	85066.8	119985	-1.41048	-34918	-15.0917
634.3514@4.653	3	3	2.58774	4.39804	15.0075	15.9018	-1.85868	1.85868	32938.4	61222.2	-1.85868	32938.4	61222.2	-1.85868	-28283.7	-14.7877
711.2798@1.224	3	3	0.459015	0.0197924	16.1875	16.3511	-1.1201	1.1201	74629.2	83591.9	-1.1201	74629.2	83591.9	-1.1201	-8962.75	-13.1297
223.0333@5.118	3	3	0.816264	0.584505	15.796	16.0504	-1.19281	1.19281	56894.9	67865.1	-1.19281	56894.9	67865.1	-1.19281	-10970.2	-13.4213
1546.122@0.93599993	3	3	0.459516	0.688278	17.047	17.3548	-1.23788	1.23788	135409	167620	-1.23788	135409	167620	-1.23788	-32211.3	-14.9753
1589.9366@0.923	3	3	1.36365	2.83627	16.9577	17.608	-1.56942	1.56942	127288	199768	-1.56942	127288	199768	-1.56942	-72480.3	-16.1453
303.8478@16.445002	3	3	0.106433	0.513197	16.5381	16.7649	-1.17027	1.17027	95161.6	111364	-1.17027	95161.6	111364	-1.17027	-16202.8	-13.984
834.1805@4.2519994	3	3	0.964908	0.486479	16.1005	15.2835	1.76184	1.76184	70266.3	39882.4	1.76184	70266.3	39882.4	1.76184	30383.9	14.891
351.1569@4.7659993	3	3	3.77175	173.205	4.90204	15.5584	-1613.98	1613.98	29.8993	48256.8	-1613.98	29.8993	48256.8	-1613.98	-48226.9	-15.5575
1483.6559@0.92399985	3	3	0.501132	1.83289	15.525	16.5664	-2.05824	2.05824	47150.3	97046.8	-2.05824	47150.3	97046.8	-2.05824	-49896.5	-15.6067
1668.8857@4.8930006	3	3	1.33227	0.402866	16.1735	16.5319	-1.28199	1.28199	73909.4	94751.3	-1.28199	73909.4	94751.3	-1.28199	-20842	-14.3472
324.0479@5.459	3	3	1.32277	1.24068	15.6125	14.9958	1.53342	1.53342	50100.5	32672.3	1.53342	50100.5	32672.3	1.53342	17428.2	14.0891
463.1004@0.923	3	3	1.14368	5.32696	14.3838	16.1597	-3.42437	3.42437	21377.6	73204.9	-3.42437	21377.6	73204.9	-3.42437	-51827.3	-15.6614
349.0787@5.0740004	3	3	2.83929	2.05162	15.9001	14.3709	2.88641	2.88641	61153.3	21186.6	2.88641	61153.3	21186.6	2.88641	39966.7	15.2865
299.1097@1.106	3	3	0.745342	0.422199	15.1699	15.4291	-1.19686	1.19686	36862.4	44119.2	-1.19686	36862.4	44119.2	-1.19686	-7256.82	-12.8251
597.7653@4.346	3	3	0.919394	0.597754	16.2964	16.7502	-1.36967	1.36967	80483.3	110235	-1.36967	80483.3	110235	-1.36967	-29752	-14.8607
320.0712@7.7620006	3	3	1.44765	2.82743	15.3775	14.1328	2.36966	2.36966	42569.4	17964.3	2.36966	42569.4	17964.3	2.36966	24605.1	14.5867
2936.953@0.934	3	3	0.470119	1.75944	15.6707	16.414	-1.67399	1.67399	52161.6	87318	-1.67399	52161.6	87318	-1.67399	-35156.4	-15.1015
347.8575@16.442999	3	3	1.52108	1.86567	16.1282	16.748	-1.53662	1.53662	71627.1	110064	-1.53662	71627.1	110064	-1.53662	-38436.7	-15.2302
829.4279@4.4759994	3	3	1.93519	1.56719	18.8812	17.844	2.05216	2.05216	482833	235280	2.05216	482833	235280	2.05216	247553	17.9174
530.1776@4.861	3	3	0.719453	3.05637	15.328	14.711	1.53367	1.53367	41132.5	26819.7	1.53367	41132.5	26819.7	1.53367	14312.8	13.805
1557.4344@1.2209998	3	3	0.421486	2.9142	17.1921	17.8061	-1.53057	1.53057	149738	229183	-1.53057	149738	229183	-1.53057	-79445.7	-16.2777
339.2154@4.798	3	3	3.17787	0.63655	16.2303	15.558	1.59364	1.59364	76881	48242.3	1.59364	76881	48242.3	1.59364	28638.7	14.8057
298.0047@7.0660014	3	3	3.03783	0.969163	15.6804	14.7267	1.93682	1.93682	52513.5	27113.2	1.93682	52513.5	27113.2	1.93682	25400.3	14.6326
2849.9165@0.91300005	3	3	1.52353	11.1467	14.5778	16.5366	-3.88744	3.88744	24453.5	95061.4	-3.88744	24453.5	95061.4	-3.88744	-70607.9	-16.1075
367.21@5.096	3	3	2.44483	1.04414	17.2249	17.9761	-1.68328	1.68328	153178	257842	-1.68328	153178	257842	-1.68328	-104663	-16.6754
309.9125@16.431	3	3	0.519879	0.750621	15.8834	16.218	-1.26099	1.26099	60448.8	76225.1	-1.26099	60448.8	76225.1	-1.26099	-15776.3	-13.9455
754.2418@3.7579997	3	3	2.61204	1.52117	16.9338	17.5757	-1.56042	1.56042	125190	195349	-1.56042	125190	195349	-1.56042	-70159	-16.0983
1678.1249@5.1819997	3	3	3.48156	1.97903	14.07	15.1419	-2.10225	2.10225	17198.1	36154.7	-2.10225	17198.1	36154.7	-2.10225	-18956.6	-14.2104
354.0936@5.097	3	3	173.205	2.85606	15.7695	4.72904	2106.23	2106.23	55858.5	26.5206	2106.23	55858.5	26.5206	2106.23	55831.9	15.7688
653.2169@3.426	3	3	1.43148	0.921221	16.5418	15.7981	1.67437	1.67437	95403.9	56979	1.67437	95403.9	56979	1.67437	38425	15.2298
471.9294@5.973	3	3	1.5584	6.02757	15.461	14.3181	2.20816	2.20816	45104.6	20426.3	2.20816	45104.6	20426.3	2.20816	24678.3	14.591
378.9807@1.1639999	3	3	0.44489	4.35618	16.9873	17.8877	-1.86657	1.86657	129920	242505	-1.86657	129920	242505	-1.86657	-112585	-16.7807
756.0175@16.377	3	3	11.8748	0.436627	16.4987	14.5893	3.75639	3.75639	92597.6	24650.7	3.75639	92597.6	24650.7	3.75639	67947	16.0521
2560.5403@0.915	3	3	1.25033	1.48203	16.3461	16.747	-1.3203	1.3203	83303.8	109986	-1.3203	83303.8	109986	-1.3203	-26682.3	-14.7036
1065.3282@3.0149996	3	3	1.16153	0.628897	16.4615	16.1685	1.22521	1.22521	90241.3	73653.7	1.22521	90241.3	73653.7	1.22521	16587.6	14.0178
1118.3785@3.6310003	3	3	0.129368	0.539742	16.6097	16.8799	-1.20598	1.20598	100002	120601	-1.20598	100002	120601	-1.20598	-20598.7	-14.3303
2015.9702@5.6650004	3	3	1.29998	3.43726	14.5274	16.1331	-3.04344	3.04344	23615	71870.9	-3.04344	23615	71870.9	-3.04344	-48255.9	-15.5584
3221.5002@0.922	3	3	0.290228	2.64371	15.9847	16.727	-1.67285	1.67285	64843.3	108473	-1.67285	64843.3	108473	-1.67285	-43630	-15.413
941.2337@3.1499999	3	3	4.2896	2.86797	15.8415	14.3624	2.78768	2.78768	58717.2	21063.1	2.78768	58717.2	21063.1	2.78768	37654.1	15.2005
119.9341@16.474	3	3	4.09075	0.912572	15.1428	14.2521	1.85405	1.85405	36177.2	19512.6	1.85405	36177.2	19512.6	1.85405	16664.6	14.0245
1471.3342@0.922	3	3	0.79478	3.56907	16.1796	17.2623	-2.11804	2.11804	74224.8	157211	-2.11804	74224.8	157211	-2.11804	-82986.6	-16.3406
265.1535@1.0889999	3	3	0.863267	0.0640816	15.9486	15.7428	1.15334	1.15334	63241.3	54832.9	1.15334	63241.3	54832.9	1.15334	8408.34	13.0376
339.8279@16.466002	3	3	0.386739	0.738507	16.3332	16.6555	-1.25032	1.25032	82563.3	103231	-1.25032	82563.3	103231	-1.25032	-20667.2	-14.3351
558.1169@0.975	3	3	1.40023	6.92852	14.1707	15.6101	-2.71223	2.71223	18441.5	50017.6	-2.71223	18441.5	50017.6	-2.71223	-31576.1	-14.9465
2802.2432@5.063	3	3	1.91859	4.93271	14.421	16.5359	-4.33176	4.33176	21935.4	95019	-4.33176	21935.4	95019	-4.33176	-73083.6	-16.1573
575.699@16.453999	3	3	0.469416	0.292582	16.9988	17.2244	-1.16929	1.16929	130960	153130	-1.16929	130960	153130	-1.16929	-22170	-14.4363
603.7245@16.528997	3	3	0.350914	0.819883	16.8541	17.1545	-1.23152	1.23152	118464	145891	-1.23152	118464	145891	-1.23152	-27427	-14.7433
216.0781@4.9970007	3	3	2.19778	1.53786	15.7151	14.8189	1.86116	1.86116	53791.2	28902	1.86116	53791.2	28902	1.86116	24889.2	14.6032
352.1502@3.7270002	3	3	1.08696	0.595536	15.8698	16.1245	-1.19309	1.19309	59879.1	71441.2	-1.19309	59879.1	71441.2	-1.19309	-11562.1	-13.4971
356.2043@4.208	3	3	4.22438	2.87622	16.389	15.464	1.89865	1.89865	85819.4	45200.3	1.89865	85819.4	45200.3	1.89865	40619.1	15.3099
695.1466@5.386001	3	3	3.79785	2.1884	15.4502	14.4446	2.00785	2.00785	44769.4	22297.2	2.00785	44769.4	22297.2	2.00785	22472.2	14.4559
564.2523@4.611	3	3	173.205	3.59196	15.2762	4.73661	1488.47	1488.47	39682.7	26.6601	1488.47	39682.7	26.6601	1488.47	39656	15.2753
410.142@3.433	3	3	4.1977	5.13539	15.3452	16.9187	-2.97622	2.97622	41626.9	123891	-2.97622	41626.9	123891	-2.97622	-82264	-16.328
620.1788@1.2539998	3	3	1.76195	0.203039	17.8903	17.5246	1.2885	1.2885	242943	188548	1.2885	242943	188548	1.2885	54395.6	15.7312
571.7802@16.447002	3	3	0.492247	0.739541	16.2471	16.7393	-1.40658	1.40658	77778.2	109401	-1.40658	77778.2	109401	-1.40658	-31622.7	-14.9487
416.0739@7.0520015	3	3	1.36123	0.687173	15.7414	15.2907	1.36669	1.36669	54781.2	40083.2	1.36669	54781.2	40083.2	1.36669	14698	13.8433
770.3623@5.4389997	3	3	0.492292	1.18211	16.0432	15.4799	1.47765	1.47765	67527.6	45699.4	1.47765	67527.6	45699.4	1.47765	21828.2	14.4139
[truncated: 1,567 more rows]

## Sheet: Streptomyces avermitilis
Compound Mass@Retention Time	[sav-b-152](3)	[sav-b-PQQ](3)	[sav-b-152] (RSD)	[sav-b-PQQ] (RSD)	[sav-b-PQQ] avg : Normalized	[sav-b-152] avg : Normalized	Signed FC (abs) ([sav-b-PQQ] vs [sav-b-152]) : Normalized	FC (abs) ([sav-b-PQQ] vs [sav-b-152]) : Normalized	[sav-b-PQQ] avg : Raw	[sav-b-152] avg : Raw	Signed FC (abs) ([sav-b-PQQ] vs [sav-b-152]) : Raw	[sav-b-PQQ] avg : Raw Scaled	[sav-b-152] avg : Raw Scaled	Signed FC (abs) ([sav-b-PQQ] vs [sav-b-152]) : Raw Scaled	Abund Diff (Raw) ([sav-b-PQQ] - [sav-b-152])	Abund Diff (Log2) ([sav-b-PQQ] - [sav-b-152])
560.3527@4.02	3	3	2.54875	2.51037	23.0211	21.5387	2.79419	2.79419	8512213	3.0464e+06	2.79419	8512213	3.0464e+06	2.79419	5465814	22.382
600.3471@4.583	3	3	1.78671	2.40975	23.6461	22.3274	2.4944	2.4944	13127298	5.2627e+06	2.4944	13127298	5.2627e+06	2.4944	7.8646e+06	22.9069
774.528@12.940001	3	3	1.59981	1.22537	23.6319	22.9761	1.57543	1.57543	12998602	8250845	1.57543	12998602	8250845	1.57543	4747757	22.1788
654.2677@6.802001	3	3	7.73123	9.84608	21.359	17.9238	10.8173	10.8173	2689744	248651	10.8173	2689744	248651	10.8173	2.44109e+06	21.2191
772.5122@11.995001	3	3	0.487444	1.05868	23.1952	22.8381	1.28081	1.28081	9603808	7.49824e+06	1.28081	9603808	7.49824e+06	1.28081	2.10556e+06	21.0058
123.0323@1.6189997	3	3	0.500009	1.09375	23.1746	22.6793	1.4096	1.4096	9467718	6716594	1.4096	9467718	6716594	1.4096	2751124	21.3916
117.0793@1.1400001	3	3	3.95319	2.02816	21.7901	20.5693	2.33081	2.33081	3.62643e+06	1555868	2.33081	3.62643e+06	1555868	2.33081	2.07056e+06	20.9816
380.073@1.1610001	3	3	0.120762	0.358513	22.5652	22.7818	-1.16202	1.16202	6205766	7211195	-1.16202	6205766	7211195	-1.16202	-1005429	-19.9394
117.0789@1.2930001	3	3	2.57905	2.82798	21.0866	19.9283	2.23198	2.23198	2.2269e+06	997726	2.23198	2.2269e+06	997726	2.23198	1.22918e+06	20.2293
754.5017@11.992999	3	3	0.469206	1.11062	22.4128	22.0682	1.26982	1.26982	5.58392e+06	4397408	1.26982	5.58392e+06	4397408	1.26982	1.18651e+06	20.1783
544.3573@3.9430003	3	3	1.63287	2.74774	21.4999	20.5383	1.94753	1.94753	2965715	1.52281e+06	1.94753	2965715	1.52281e+06	1.94753	1.44291e+06	20.4605
904.67@4.9739995	3	3	0.538183	0.674842	21.84	22.1024	-1.19943	1.19943	3754077	4502768	-1.19943	3754077	4502768	-1.19943	-748691	-19.514
776.5067@11.310999	3	3	0.620462	0.964447	22.0977	21.729	1.29119	1.29119	4.48817e+06	3.476e+06	1.29119	4.48817e+06	3.476e+06	1.29119	1.01216e+06	19.949
517.3099@3.916	3	3	1.81072	1.05407	21.1009	20.1708	1.90536	1.90536	2.24905e+06	1.18038e+06	1.90536	2.24905e+06	1.18038e+06	1.90536	1068673	20.0274
738.5061@12.940001	3	3	1.6898	2.34234	21.849	20.8498	1.99899	1.99899	3.77758e+06	1.88974e+06	1.99899	3.77758e+06	1.88974e+06	1.99899	1.88783e+06	20.8483
428.3277@12.898001	3	3	7.40126	3.35834	18.7521	16.5279	4.67244	4.67244	441515	94493.6	4.67244	441515	94493.6	4.67244	347022	18.4047
1651.8932@4.722	3	3	0.368111	9.60547	19.2206	22.0585	-7.14976	7.14976	610906	4.36783e+06	-7.14976	610906	4.36783e+06	-7.14976	-3.75692e+06	-21.8411
408.3702@15.929998	3	3	0.801674	2.72589	21.3729	17.2853	17.0024	17.0024	2.71576e+06	159728	17.0024	2.71576e+06	159728	17.0024	2556032	21.2855
318.2258@4.0169997	3	3	3.53828	2.99364	19.8312	18.2328	3.02809	3.02809	932808	308052	3.02809	932808	308052	3.02809	624756	19.2529
584.3521@4.4500003	3	3	2.41884	4.18877	21.3556	20.0465	2.47782	2.47782	2.68329e+06	1082923	2.47782	2.68329e+06	1082923	2.47782	1.60036e+06	20.61
360.2365@3.6839995	3	3	1.92431	1.52031	20.307	19.5246	1.71996	1.71996	1.29721e+06	754206	1.71996	1.29721e+06	754206	1.71996	543000	19.0506
317.1945@3.499	3	3	1.46409	2.2847	19.9031	18.8354	2.09617	2.09617	980487	467751	2.09617	980487	467751	2.09617	512736	18.9679
626.3197@3.986	3	3	1.28719	4.26541	20.3205	21.5062	-2.27474	2.27474	1.30941e+06	2.97855e+06	-2.27474	1.30941e+06	2.97855e+06	-2.27474	-1.66915e+06	-20.6707
491.1888@1.038	3	3	0.868889	3.34024	20.2787	19.3072	1.96088	1.96088	1272022	648700	1.96088	1272022	648700	1.96088	623322	19.2496
955.6431@13.843	3	3	0.194528	0.121149	21.4526	21.2901	1.11923	1.11923	2.87e+06	2.56428e+06	1.11923	2.87e+06	2.56428e+06	1.11923	305726	18.2219
242.1259@4.0190005	3	3	4.02716	3.26293	19.3924	17.5801	3.5121	3.5121	688188	195948	3.5121	688188	195948	3.5121	492240	18.909
756.5163@12.938002	3	3	2.22752	2.54899	21.1663	20.1775	1.9845	1.9845	2.35334e+06	1.18586e+06	1.9845	2.35334e+06	1.18586e+06	1.9845	1.16748e+06	20.155
827.5958@14.173998	3	3	0.19564	0.414099	21.2451	21.0436	1.14987	1.14987	2.4855e+06	2161538	1.14987	2.4855e+06	2161538	1.14987	323957	18.3054
155.0351@1.12	3	3	4.76465	2.30211	20.4636	19.032	2.69741	2.69741	1445964	536056	2.69741	1445964	536056	2.69741	909908	19.7954
624.1509@3.1749997	3	3	0.658182	0.391815	21.2161	21.4601	-1.18429	1.18429	2.43603e+06	2.88497e+06	-1.18429	2.43603e+06	2.88497e+06	-1.18429	-448933	-18.7761
420.3704@15.38	3	3	3.73378	4.95374	20.6235	18.5416	4.2337	4.2337	1.61543e+06	381564	4.2337	1.61543e+06	381564	4.2337	1.23386e+06	20.2347
774.5269@14.889002	3	3	2.971	0.813007	21.2096	20.1117	2.14049	2.14049	2.42512e+06	1.13298e+06	2.14049	2.42512e+06	1.13298e+06	2.14049	1.29214e+06	20.3013
394.3543@15.097	3	3	4.66834	5.64422	19.8394	18.077	3.3926	3.3926	938137	276525	3.3926	938137	276525	3.3926	661612	19.3356
792.3826@7.7200003	3	3	8.51985	5.94317	16.6717	14.3871	4.87242	4.87242	104397	21426.1	4.87242	104397	21426.1	4.87242	82971	16.3403
871.6219@14.119001	3	3	0.430634	0.32505	21.1428	20.8695	1.2086	1.2086	2.3154e+06	1.91577e+06	1.2086	2.3154e+06	1.91577e+06	1.2086	399626	18.6083
805.5328@13.106001	3	3	0.468952	0.299166	20.9699	20.6551	1.24382	1.24382	2.05386e+06	1.65125e+06	1.24382	2.05386e+06	1.65125e+06	1.24382	402608	18.619
823.5643@13.984999	3	3	0.25177	0.218362	20.9068	20.7489	1.11564	1.11564	1965966	1.76218e+06	1.11564	1965966	1.76218e+06	1.11564	203786	17.6367
729.2791@3.1469998	3	3	2.18355	0.752551	20.8023	20.096	1.63162	1.63162	1.8286e+06	1.12073e+06	1.63162	1.8286e+06	1.12073e+06	1.63162	707874	19.4331
804.5335@13.134001	3	3	2.68462	173.205	4.11384	14.0273	-964.383	964.383	17.3137	16697	-964.382	17.3137	16697	-964.382	-16679.7	-14.0258
598.3304@4.75	3	3	1.39516	5.3648	20.4023	18.6845	3.28945	3.28945	1.38585e+06	421302	3.28945	1.38585e+06	421302	3.28945	964550	19.8795
788.5406@13.309	3	3	3.81499	2.25273	20.394	19.099	2.45382	2.45382	1.37785e+06	561513	2.45382	1.37785e+06	561513	2.45382	816340	19.6388
736.4897@11.989999	3	3	0.717562	0.987882	20.7449	20.2895	1.37124	1.37124	1.75731e+06	1.28155e+06	1.37124	1.75731e+06	1.28155e+06	1.37124	475757	18.8599
772.511@14.412001	3	3	3.57916	1.58853	20.2971	18.8134	2.7965	2.7965	1.28833e+06	460692	2.7965	1.28833e+06	460692	2.7965	827634	19.6586
309.1426@4.062	3	3	0.111976	1.37595	20.1168	20.4797	-1.28603	1.28603	1.13698e+06	1.46219e+06	-1.28603	1.13698e+06	1.46219e+06	-1.28603	-325211	-18.311
135.0544@2.9349997	3	3	4.65286	2.5808	20.4482	19.1659	2.43229	2.43229	1.43062e+06	588179	2.43229	1.43062e+06	588179	2.43229	842446	19.6842
915.6456@15.046	3	3		86.7098	7.85967	0	232.272	232.272	232.272	1	232.272	232.272	1	232.272	231.272	7.85345
804.5317@13.106001	3	3	0.388802	0.504565	20.2715	20.054	1.16277	1.16277	1.26573e+06	1.08855e+06	1.16277	1.26573e+06	1.08855e+06	1.16277	177183	17.4349
655.2725@4.1230006	3	3	3.47758	1.53718	18.8855	19.9719	-2.1234	2.1234	484289	1.02834e+06	-2.1234	484289	1.02834e+06	-2.1234	-544050	-19.0534
156.0895@3.048	3	3	0.384341	0.532	20.6345	20.8798	-1.18537	1.18537	1.62776e+06	1.9295e+06	-1.18537	1.62776e+06	1.9295e+06	-1.18537	-301732	-18.2029
619.1955@3.1819997	3	3	1.02685	0.28032	20.1118	20.525	-1.33163	1.33163	1133083	1.50885e+06	-1.33163	1133083	1.50885e+06	-1.33163	-375768	-18.5195
1636.9287@4.5320005	3	3	6.00268	2.52931	17.7731	19.9942	-4.66243	4.66243	223994	1.04435e+06	-4.66243	223994	1.04435e+06	-4.66243	-820361	-19.6459
582.2464@7.0360003	3	3	0.567546	1.17397	19.4581	18.9393	1.43278	1.43278	720218	502671	1.43278	720218	502671	1.43278	217547	17.731
788.5409@13.449999	3	3	1.50649	1.84748	20.3861	19.3561	2.0421	2.0421	1.37037e+06	671059	2.0421	1.37037e+06	671059	2.0421	699313	19.4156
129.0427@1.1380001	3	3	1.1248	3.88659	19.1399	20.3927	-2.38306	2.38306	577687	1376663	-2.38306	577687	1376663	-2.38306	-798976	-19.6078
828.4775@11.991999	3	3	0.498045	0.784298	20.1043	19.4866	1.53437	1.53437	1.12715e+06	734603	1.53437	1.12715e+06	734603	1.53437	392552	18.5825
230.1262@3.395	3	3	1.02882	1.20366	19.6197	20.1847	-1.47935	1.47935	805621	1191799	-1.47935	805621	1191799	-1.47935	-386178	-18.5589
200.1156@4.5789995	3	3	2.77108	2.81889	19.0974	17.7452	2.55306	2.55306	560909	219700	2.55306	560909	219700	2.55306	341209	18.3803
835.5786@11.995001	3	3	0.829251	1.6308	20.4307	19.8964	1.44822	1.44822	1.41339e+06	975948	1.44822	1.41339e+06	975948	1.44822	437441	18.7387
554.2847@9.334	3	3	1.27433	6.65966	18.9966	20.4115	-2.66651	2.66651	523040	1394693	-2.66651	523040	1394693	-2.66651	-871653	-19.7334
830.5137@12.152	3	3	11.1843	4.18893	12.3751	14.8124	-5.41608	5.41608	5312.29	28771.8	-5.41608	5312.29	28771.8	-5.41608	-23459.5	-14.5179
828.4986@10.741999	3	3	2.4471	1.32545	19.8369	19.0979	1.66902	1.66902	936505	561112	1.66902	936505	561112	1.66902	375393	18.518
789.5367@14.411	3	3	4.92429	2.5442	19.9019	17.7375	4.48263	4.48263	979641	218541	4.48263	979641	218541	4.48263	761100	19.5377
738.5058@13.3029995	3	3	173.205	17.1889	14.3063	4.03081	1239.49	1239.49	20260	16.3454	1239.49	20260	16.3454	1239.49	20243.6	14.3052
156.1256@5.1559997	3	3	1.64531	2.57802	19.2166	20.0803	-1.81967	1.81967	609208	1.10856e+06	-1.81967	609208	1.10856e+06	-1.81967	-499349	-18.9297
960.5974@13.85	3	3	0.834143	0.991729	19.8303	20.2011	-1.29308	1.29308	932206	1205419	-1.29308	932206	1205419	-1.29308	-273213	-18.0597
545.6428@4.527	3	3	5.97777	3.72511	17.1265	19.6634	-5.8035	5.8035	143079	830360	-5.8035	143079	830360	-5.8035	-687281	-19.3905
1236.8253@13.545	3	3	0.246915	0.254476	20.0089	19.8164	1.14274	1.14274	1.05505e+06	923261	1.14274	1.05505e+06	923261	1.14274	131785	17.0078
344.2416@3.5729995	3	3	0.494159	3.71698	18.9578	17.9414	2.02285	2.02285	509182	251716	2.02285	509182	251716	2.02285	257466	17.974
316.2102@3.5750003	3	3	1.75656	5.77551	18.1337	16.4478	3.21723	3.21723	287591	89390.9	3.21723	287591	89390.9	3.21723	198200	17.5966
414.3488@15.982	3	3	21.1028	173.205	4.62618	14.7068	-1082.88	1082.88	24.6955	26742.4	-1082.88	24.6955	26742.4	-1082.88	-26717.7	-14.7055
953.626@12.673001	3	3	0.689502	1.69965	19.9769	18.958	2.02647	2.02647	1.03194e+06	509229	2.02647	1.03194e+06	509229	2.02647	522710	18.9957
909.6001@12.731001	3	3	1.51941	0.828338	19.7609	18.5204	2.36271	2.36271	888410	376013	2.36271	888410	376013	2.36271	512397	18.9669
410.3541@15.984999	3	3	1.91231	31.0501	14.5548	19.8721	-39.8706	39.8706	24067.9	959604	-39.8706	24067.9	959604	-39.8706	-935536	-19.8354
720.4948@12.935999	3	3	1.60207	2.81455	19.8603	19.025	1.78423	1.78423	951788	533444	1.78423	951788	533444	1.78423	418344	18.6743
417.2004@3.1650002	3	3	7.12101	6.18185	16.3512	13.8757	5.56159	5.56159	83600.6	15031.8	5.56159	83600.6	15031.8	5.56159	68568.8	16.0653
318.1067@5.3240004	3	3	1.0706	1.7318	19.2997	19.8643	-1.47901	1.47901	645335	954460	-1.47901	645335	954460	-1.47901	-309125	-18.2378
711.268@3.5289998	3	3	2.55244	1.06429	19.7517	19.0062	1.67652	1.67652	882784	526557	1.67652	882784	526557	1.67652	356227	18.4424
1651.0697@12.212999	3	3	0.967092	0.862542	20.0089	19.4533	1.46977	1.46977	1.05503e+06	717822	1.46977	1.05503e+06	717822	1.46977	337212	18.3633
560.3141@4.02	3	3	13.5871	4.26118	18.0305	15.4308	6.0616	6.0616	267753	44172.1	6.0616	267753	44172.1	6.0616	223581	17.7704
272.1139@1.12	3	3	9.28956	3.54701	18.9623	16.5154	5.45229	5.45229	510755	93677.3	5.45229	510755	93677.3	5.45229	417078	18.67
617.325@4.4189997	3	3	1.18207	4.12621	19.6938	18.7385	1.93896	1.93896	848064	437380	1.93896	848064	437380	1.93896	410684	18.6477
530.3232@12.002	3	3	0.483913	0.797701	20.0293	19.6793	1.27451	1.27451	1.07007e+06	839590	1.27451	1.07007e+06	839590	1.27451	230479	17.8143
865.574@12.785001	3	3	1.05673	1.14106	19.6616	18.5157	2.21289	2.21289	829356	374784	2.21289	829356	374784	2.21289	454572	18.7942
202.1315@3.8250003	3	3	2.01284	3.23499	18.2581	17.4094	1.80077	1.80077	313489	174086	1.80077	313489	174086	1.80077	139403	17.0889
545.977@4.5330005	3	3	6.26703	2.96851	17.0207	19.4948	-5.55614	5.55614	132966	738775	-5.55614	132966	738775	-5.55614	-605810	-19.2085
542.1248@1.163	3	3	0.460924	2.0617	19.6297	18.8781	1.6837	1.6837	811215	481805	1.6837	811215	481805	1.6837	329410	18.3295
185.0986@1.1970001	3	3	2.37964	1.25931	18.627	19.6143	-1.98244	1.98244	404839	802570	-1.98244	404839	802570	-1.98244	-397731	-18.6014
568.3@10.520001	3	3	1.96604	6.16817	19.2274	20.8844	-3.15357	3.15357	613800	1.93566e+06	-3.15357	613800	1.93566e+06	-3.15357	-1.32186e+06	-20.3341
997.6519@12.616999	3	3	1.13096	1.95721	19.8945	18.5763	2.49355	2.49355	974630	390861	2.49355	974630	390861	2.49355	583769	19.155
772.5101@12.240999	3	3	10.2908	10.3595	21.9613	16.9905	31.3586	31.3586	4.08324e+06	130211	31.3586	4.08324e+06	130211	31.3586	3.95303e+06	21.9145
1280.8512@13.497999	3	3	0.407385	0.429766	19.5715	19.3462	1.169	1.169	779116	666482	1.169	779116	666482	1.169	112634	16.7813
926.4985@11.491999	3	3	1.15513	6.30449	17.7934	19.7613	-3.91223	3.91223	227160	888705	-3.91223	227160	888705	-3.91223	-661544	-19.3355
728.4843@7.339999	3	3	3.20094	1.38692	19.8516	18.9826	1.82645	1.82645	946110	518004	1.82645	946110	518004	1.82645	428106	18.7076
792.3826@7.634	3	3	3.10832	4.79727	15.9635	14.5112	2.73642	2.73642	63898.1	23351	2.73642	63898.1	23351	2.73642	40547.1	15.3073
586.3317@4.4280005	3	3	6.16453	0.675429	19.84	18.2782	2.95234	2.95234	938519	317890	2.95234	938519	317890	2.95234	620630	19.2434
346.2094@3.6440005	3	3	1.45535	3.66894	16.2588	15.5336	1.65312	1.65312	78411.1	47432.2	1.65312	78411.1	47432.2	1.65312	30978.9	14.919
410.3167@12.933001	3	3	1.15951	3.22148	16.312	15.5864	1.65359	1.65359	81356.5	49200	1.65359	81356.5	49200	1.65359	32156.5	14.9728
805.5295@13.472	3	3	173.205	13.6288	14.3256	4.67597	803.226	803.226	20532.6	25.5627	803.226	20532.6	25.5627	803.226	20507.1	14.3238
242.1258@4.4840007	3	3	1.44915	1.19413	18.8798	18.4239	1.37163	1.37163	482376	351682	1.37163	482376	351682	1.37163	130695	16.9958
267.1576@3.7690005	3	3	1.40512	3.0876	18.3809	19.5996	-2.32746	2.32746	341344	794465	-2.32746	341344	794465	-2.32746	-453121	-18.7895
156.1258@15.928999	3	3	3.23193	3.57654	19.1332	14.8474	19.5054	19.5054	575000	29479	19.5054	575000	29479	19.5054	545521	19.0573
213.9106@1.024	3	3	0.838558	2.50821	18.9644	19.7459	-1.71881	1.71881	511525	879215	-1.71881	511525	879215	-1.71881	-367690	-18.4881
749.2221@1.2539998	3	3	1.40614	2.73874	18.4293	19.6764	-2.37359	2.37359	353010	837902	-2.37359	353010	837902	-2.37359	-484892	-18.8873
418.3545@13.974001	3	3	2.40541	6.0312	18.818	16.6591	4.46596	4.46596	462159	103485	4.46596	462159	103485	4.46596	358674	18.4523
246.1209@3.7079997	3	3	0.0507852	0.0686491	19.4797	19.0094	1.38535	1.38535	731072	527716	1.38535	731072	527716	1.38535	203356	17.6337
412.3693@16.319	3	3	3.21382	173.205	3.47332	19.763	-80109.2	80109.2	11.1064	889725	-80109.2	11.1064	889725	-80109.2	-889714	-19.763
1219.7981@13.550001	3	3	0.0480367	0.639944	19.3956	19.1856	1.15669	1.15669	689706	596276	1.15669	689706	596276	1.15669	93429.9	16.5116
1041.6779@12.569	3	3	0.824325	1.24827	19.2276	18.2695	1.94263	1.94263	613862	315996	1.94263	613862	315996	1.94263	297866	18.1843
394.3543@14.839998	3	3	8.66739	4.31619	18.6516	16.454	4.58709	4.58709	411797	89772.9	4.58709	411797	89772.9	4.58709	322024	18.2968
101.0837@4.0180006:1	3	3	3.83017	3.73148	17.6154	15.8497	3.40036	3.40036	200794	59051	3.40036	200794	59051	3.40036	141744	17.1129
156.1258@15.095999	3	3	4.79066	6.84271	18.1564	15.8519	4.93979	4.93979	292157	59143.7	4.93979	292157	59143.7	4.93979	233014	17.8301
333.0823@1.198	3	3	0.552109	4.15327	18.8744	16.7446	4.37666	4.37666	480582	109806	4.37666	480582	109806	4.37666	370776	18.5002
821.548@12.829	3	3	1.32325	0.563873	18.949	17.6661	2.43322	2.43322	506068	207983	2.43322	506068	207983	2.43322	298086	18.1854
528.3618@3.85	3	3	1.63547	4.01404	18.8558	17.7921	2.0904	2.0904	474433	226958	2.0904	474433	226958	2.0904	247474	17.9169
298.2503@8.087999	3	3	1.23646	9.20622	17.3855	19.2193	-3.5646	3.5646	171225	610350	-3.5646	171225	610350	-3.5646	-439125	-18.7443
289.2611@7.0740004	3	3	3.05827	1.93927	18.1715	19.1352	-1.95026	1.95026	295239	575794	-1.95026	295239	575794	-1.95026	-280555	-18.0979
276.1318@1.2790002	3	3	5.30266	1.20402	18.2892	15.7894	5.65639	5.65639	320339	56633.2	5.65639	320339	56633.2	5.65639	263706	18.0086
1739.1215@12.123	3	3	1.03209	2.98423	18.8942	17.9672	1.90133	1.90133	487206	256244	1.90133	487206	256244	1.90133	230962	17.8173
514.401@12.934999	3	3	1.89332	1.91532	19.3769	18.4854	1.85512	1.85512	680824	366998	1.85512	680824	366998	1.85512	313827	18.2596
532.4114@12.935999	3	3	2.07287	2.25535	19.2782	18.361	1.88847	1.88847	635789	336669	1.88847	635789	336669	1.88847	299120	18.1904
662.474@11.992999	3	3	0.410049	0.686373	19.5308	19.2359	1.22675	1.22675	757440	617434	1.22675	757440	617434	1.22675	140005	17.0951
450.2348@5.5680003	3	3	2.33202	6.51894	17.0431	18.9743	-3.81368	3.81368	135044	515016	-3.81368	135044	515016	-3.81368	-379971	-18.5355
445.144@3.066	3	3	1.85345	1.56973	18.4693	18.9852	-1.4299	1.4299	362918	518937	-1.4299	362918	518937	-1.4299	-156019	-17.2514
654.4114@12.0	3	3	0.249805	0.673984	19.2865	18.958	1.25566	1.25566	639454	509259	1.25566	639454	509259	1.25566	130195	16.9903
442.2414@4.4830003	3	3	2.12263	1.27469	18.5069	17.9753	1.44555	1.44555	372504	257691	1.44555	372504	257691	1.44555	114813	16.8089
501.3153@3.8259997	3	3	2.04698	1.29439	18.7128	17.7845	1.903	1.903	429648	225775	1.903	429648	225775	1.903	203874	17.6373
908.487@13.411001	3	3	0.866041	8.52431	17.0769	19.3521	-4.84063	4.84063	138245	669191	-4.84063	138245	669191	-4.84063	-530946	-19.0182
825.5789@12.981001	3	3	0.513343	0.822717	18.7923	17.8285	1.95038	1.95038	453989	232770	1.95038	453989	232770	1.95038	221220	17.7551
161.0798@1.1829998	3	3	3.46839	3.94224	17.6577	16.0596	3.02734	3.02734	206772	68301.5	3.02734	206772	68301.5	3.02734	138470	17.0792
285.1675@4.535	3	3	2.09346	2.63215	18.2821	19.1016	-1.76488	1.76488	318753	562561	-1.76488	318753	562561	-1.76488	-243808	-17.8954
137.0478@1.1669999	3	3	1.5138	0.997673	18.2388	18.7054	-1.38184	1.38184	309327	427442	-1.38184	309327	427442	-1.38184	-118115	-16.8498
598.305@1.3810002	3	3	1.32076	5.14175	18.0624	16.3481	3.28136	3.28136	273731	83420	3.28136	273731	83420	3.28136	190311	17.538
431.2161@3.212	3	3	2.79923	5.34739	17.0404	15.1482	3.71185	3.71185	134791	36313.6	3.71185	134791	36313.6	3.71185	98477.1	16.5875
614.3251@5.2799997	3	3	2.99016	4.81322	18.9086	17.3213	3.00493	3.00493	492097	163763	3.00493	492097	163763	3.00493	328334	18.3248
156.1255@4.5380006	3	3	1.96867	2.85924	18.0978	19.092	-1.99205	1.99205	280528	558827	-1.99205	280528	558827	-1.99205	-278298	-18.0863
781.5527@13.032	3	3	1.17812	1.42447	18.7929	17.7923	2.00093	2.00093	454192	226990	2.00093	454192	226990	2.00093	227202	17.7936
318.2258@3.9319997	3	3	3.67642	2.93462	17.654	16.2672	2.61491	2.61491	206239	78870.3	2.61491	206239	78870.3	2.61491	127368	16.9586
598.3857@6.6589994	3	3	0.910592	0.0601611	18.9738	19.2099	-1.17782	1.17782	514849	606399	-1.17782	514849	606399	-1.17782	-91549.4	-16.4823
869.6049@12.9089985	3	3	1.77072	0.523284	18.6812	17.4118	2.41062	2.41062	420332	174367	2.41062	420332	174367	2.41062	245965	17.9081
414.3489@15.512999	3	3	14.2524	88.3979	8.43975	18.0541	-783.787	783.787	347.231	272155	-783.787	347.231	272155	-783.787	-271808	-18.0522
458.3593@14.503	3	3	0.524202	1.5026	18.7976	19.2772	-1.39429	1.39429	455674	635344	-1.39429	455674	635344	-1.39429	-179669	-17.455
804.5287@13.106001	3	3	0.0807807	0.876383	20.2861	20.0388	1.18696	1.18696	1.27858e+06	1.07719e+06	1.18696	1.27858e+06	1.07719e+06	1.18696	201389	17.6196
599.3144@4.7070003	3	3	0.955459	2.27832	18.7264	17.9853	1.67144	1.67144	433710	259482	1.67144	433710	259482	1.67144	174228	17.4106
754.4994@12.240999	3	3	3.99387	12.6652	20.9632	15.6309	40.289	40.289	2.04435e+06	50742.2	40.289	2.04435e+06	50742.2	40.289	1.99361e+06	20.927
516.3242@3.9710002	3	3	0.806012	3.14836	17.7545	16.4533	2.4644	2.4644	221126	89728.1	2.4644	221126	89728.1	2.4644	131398	17.0036
374.2157@3.2649999	3	3	4.21828	7.11535	16.506	18.4606	-3.87622	3.87622	93065.5	360742	-3.87622	93065.5	360742	-3.87622	-267676	-18.0301
770.4942@13.1	3	3	0.468897	0.534763	19.262	18.8017	1.37583	1.37583	628698	456958	1.37583	628698	456958	1.37583	171739	17.3899
266.0895@6.689	3	3	0.654473	0.251445	18.7061	19.0341	-1.25533	1.25533	427647	536837	-1.25533	427647	536837	-1.25533	-109190	-16.7365
913.631@15.914999	3	3	1.60693	0.499838	19.4037	18.8637	1.45395	1.45395	693590	477037	1.45395	693590	477037	1.45395	216553	17.7244
354.1891@3.584	3	3	4.95681	6.86428	15.6314	18.3081	-6.39386	6.39386	50759.7	324551	-6.39386	50759.7	324551	-6.39386	-273791	-18.0627
156.1259@15.380999	3	3	5.3739	5.61402	18.2164	15.5102	6.52619	6.52619	304571	46669	6.52619	304571	46669	6.52619	257902	17.9765
453.2315@1.3810002	3	3	1.7535	5.1743	17.7689	16.2186	2.92873	2.92873	223339	76257.9	2.92873	223339	76257.9	2.92873	147081	17.1662
1085.7032@12.516999	3	3	0.344162	0.867203	18.9173	18.0631	1.8078	1.8078	495079	273857	1.8078	495079	273857	1.8078	221222	17.7551
244.1533@1.224	3	3	1.62186	5.60481	17.0988	18.8051	-3.26336	3.26336	140361	458047	-3.26336	140361	458047	-3.26336	-317686	-18.2772
913.631@12.859999	3	3	1.14538	0.774588	18.6879	17.3705	2.49201	2.49201	422286	169456	2.49201	422286	169456	2.49201	252830	17.9478
610.458@12.939001	3	3	1.86359	2.98857	18.8101	17.9998	1.75366	1.75366	459641	262104	1.75366	459641	262104	1.75366	197537	17.5918
924.6124@10.288001	3	3	6.00706	1.73336	18.5187	16.7221	3.47385	3.47385	375554	108109	3.47385	375554	108109	3.47385	267445	18.0289
221.9812@1.0979999	3	3	0.686929	2.10944	18.3843	19.0437	-1.57942	1.57942	342163	540417	-1.57942	342163	540417	-1.57942	-198255	-17.597
160.1208@3.8200002	3	3	1.11493	2.45475	17.4534	16.372	2.11614	2.11614	179476	84813	2.11614	179476	84813	2.11614	94663.1	16.5305
514.328@12.934	3	3	1.91673	2.27912	18.8261	17.8621	1.9508	1.9508	464763	238242	1.9508	464763	238242	1.9508	226521	17.7893
788.5051@12.281999	3	3	1.45509	0.459284	18.9558	18.5091	1.36292	1.36292	508453	373062	1.36292	508453	373062	1.36292	135392	17.0468
287.1844@3.0989997	3	3	0.464791	0.661377	18.4097	18.9335	-1.43768	1.43768	348244	500665	-1.43768	348244	500665	-1.43768	-152421	-17.2177
672.4581@7.88	3	3	2.05583	1.77259	18.7269	18.0983	1.54614	1.54614	433882	280623	1.54614	433882	280623	1.54614	153259	17.2256
388.195@3.323	3	3	2.84756	11.8751	16.1405	18.4877	-5.08849	5.08849	72239.9	367592	-5.08849	72239.9	367592	-5.08849	-295352	-18.1721
821.5271@10.988999	3	3	1.82451	2.47802	18.6161	17.3533	2.39957	2.39957	401781	167439	2.39957	401781	167439	2.39957	234342	17.8383
873.6021@14.509001	3	3	3.42795	0.35562	17.5451	18.3488	-1.74555	1.74555	191246	333830	-1.74555	191246	333830	-1.74555	-142583	-17.1214
546.3114@4.5330005	3	3	6.3142	2.56999	16.2631	18.5056	-4.73225	4.73225	78644.2	372164	-4.73225	78644.2	372164	-4.73225	-293519	-18.1631
790.5146@13.164	3	3	0.0729385	173.205	6.12891	18.7446	-6276.47	6276.47	69.9818	439239	-6276.47	69.9818	439239	-6276.47	-439169	-18.7444
436.1686@3.2330003	3	3	0.46859	1.0556	17.7174	16.9155	1.74343	1.74343	215512	123614	1.74343	215512	123614	1.74343	91897.8	16.4877
203.0792@1.6070001	3	3	2.0052	5.40239	18.1617	16.1849	3.93607	3.93607	293234	74499.1	3.93607	293234	74499.1	3.93607	218735	17.7388
99.0694@3.388	3	3	0.564567	1.07866	19.1051	18.3733	1.66071	1.66071	563910	339560	1.66071	563910	339560	1.66071	224349	17.7754
147.0556@1.1429999	3	3	2.0012	4.28828	18.1022	19.3425	-2.36239	2.36239	281390	664755	-2.36239	281390	664755	-2.36239	-383364	-18.5484
158.0691@1.2959999	3	3	0.9864	2.76356	18.4324	17.0279	2.64722	2.64722	353746	133629	2.64722	353746	133629	2.64722	220117	17.7479
674.3053@6.417	3	3	1.82841	8.63105	16.9703	19.1571	-4.55305	4.55305	128398	584601	-4.55305	128398	584601	-4.55305	-456204	-18.7993
372.2002@3.5940003	3	3	2.88614	9.64328	16.1293	18.6162	-5.60598	5.60598	71678.6	401829	-5.60598	71678.6	401829	-5.60598	-330150	-18.3328
502.3466@3.442	3	3	3.73722	10.4565	17.9125	15.655	4.78167	4.78167	246713	51595.5	4.78167	246713	51595.5	4.78167	195117	17.574
594.2461@6.8	3	3	173.205	12.3056	16.098	4.70151	2695.86	2695.86	70144.2	26.0192	2695.86	70144.2	26.0192	2695.86	70118.2	16.0975
502.3846@14.5	3	3	0.337761	1.36639	18.4653	18.8078	-1.26797	1.26797	361915	458897	-1.26797	361915	458897	-1.26797	-96981.5	-16.5654
656.4272@12.933001	3	3	1.86673	1.46706	18.6828	17.5321	2.22021	2.22021	420808	189535	2.22021	420808	189535	2.22021	231273	17.8192
210.1357@4.6339993	3	3	0.378494	2.33175	18.2086	18.7554	-1.46088	1.46088	302916	442523	-1.46088	302916	442523	-1.46088	-139608	-17.091
386.2513@4.161	3	3	1.42406	1.04606	17.712	18.2512	-1.45326	1.45326	214699	312014	-1.45326	214699	312014	-1.45326	-97314.9	-16.5704
301.2356@1.552	3	3	0.915141	0.635397	18.3869	18.6957	-1.23871	1.23871	342775	424600	-1.23871	342775	424600	-1.23871	-81824.8	-16.3203
200.1155@4.48	3	3	2.45613	0.839542	18.0027	17.4802	1.43647	1.43647	262635	182834	1.43647	262635	182834	1.43647	79801.4	16.2841
546.3363@3.959	3	3	7.32655	0.525058	17.2916	15.802	2.80814	2.80814	160430	57130.5	2.80814	160430	57130.5	2.80814	103300	16.6565
126.0252@1.1970001	3	3	1.49917	1.89767	18.0781	18.7891	-1.63699	1.63699	276722	452991	-1.63699	276722	452991	-1.63699	-176269	-17.4274
794.4927@14.233	3	3	6.95507	3.23889	17.5178	15.3531	4.48377	4.48377	187669	41855.2	4.48377	187669	41855.2	4.48377	145814	17.1538
777.5246@12.863001	3	3	0.345151	0.943341	18.8218	17.7605	2.08686	2.08686	463380	222046	2.08686	463380	222046	2.08686	241334	17.8807
752.5201@13.309999	3	3	9.47245	1.87963	18.4739	15.9689	5.67646	5.67646	364074	64137.5	5.67646	364074	64137.5	5.67646	299936	18.1943
1146.7555@12.467001	3	3	0.582782	2.56945	18.5021	17.5307	1.96074	1.96074	371255	189344	1.96074	371255	189344	1.96074	181911	17.4729
266.0891@5.2319994	3	3	0.920153	1.38918	18.1665	18.5591	-1.31279	1.31279	294211	386236	-1.31279	294211	386236	-1.31279	-92025.5	-16.4897
821.5447@13.844999	3	3	3.86455	16.8767	11.1077	14.8513	-13.3949	13.3949	2206.76	29559.3	-13.3949	2206.76	29559.3	-13.3949	-27352.6	-14.7394
530.3959@12.474	3	3		86.6324	7.72043	0	210.902	210.902	210.902	1	210.902	210.902	1	210.902	209.902	7.71357
230.1372@1.7110002	3	3	0.452755	0.71585	18.7072	18.4333	1.20903	1.20903	427973	353981	1.20903	427973	353981	1.20903	73991.4	16.1751
317.0998@4.5989995	3	3	0.755405	2.31397	17.7675	18.5641	-1.73706	1.73706	223126	387583	-1.73706	223126	387583	-1.73706	-164458	-17.3274
600.3456@4.264	3	3	6.19279	6.85905	17.7472	15.4372	4.95875	4.95875	220004	44366.7	4.95875	220004	44366.7	4.95875	175637	17.4222
1014.6783@12.652	3	3	2.1192	0.659272	18.4979	17.5871	1.8801	1.8801	370186	196897	1.8801	370186	196897	1.8801	173289	17.4028
851.5744@10.338999	3	3	2.94465	3.34759	16.7666	17.9872	-2.33041	2.33041	111496	259832	-2.33041	111496	259832	-2.33041	-148336	-17.1785
199.0839@3.916	3	3	3.60296	2.33872	16.8214	15.3877	2.70145	2.70145	115810	42869.7	2.70145	115810	42869.7	2.70145	72940.7	16.1544
386.167@5.494	3	3	2.71481	4.09812	16.9216	18.09	-2.24767	2.24767	124138	279022	-2.24767	124138	279022	-2.24767	-154883	-17.2408
729.2782@1.2349999	3	3	2.28344	0.223739	18.5013	17.9697	1.4455	1.4455	371057	256698	1.4455	371057	256698	1.4455	114359	16.8032
174.0635@1.1520001	3	3	2.74477	2.05255	16.6633	17.6603	-1.99591	1.99591	103787	207149	-1.99591	103787	207149	-1.99591	-103363	-16.6574
163.085@4.063	3	3	0.0128555	1.82874	18.3346	18.7281	-1.31357	1.31357	330571	434229	-1.31357	330571	434229	-1.31357	-103657	-16.6615
452.1594@8.447999	3	3	173.205	1.03356	16.6303	5.38324	2430.5	2430.5	101441	41.7366	2430.5	101441	41.7366	2430.5	101399	16.6297
912.4832@10.169	3	3	1.82055	10.2175	16.0506	18.4639	-5.32688	5.32688	67876.3	361569	-5.32688	67876.3	361569	-5.32688	-293693	-18.1639
295.1264@1.6070001	3	3	1.7995	4.57528	18.036	16.0133	4.06343	4.06343	268771	66143.8	4.06343	268771	66143.8	4.06343	202627	17.6285
262.1197@6.477	3	3	4.27196	6.88347	18.5052	16.5884	3.77573	3.77573	372057	98539.1	3.77573	372057	98539.1	3.77573	273518	18.0613
584.3512@4.202	3	3	3.57587	7.03435	18.03	16.4722	2.94403	2.94403	267646	90911.4	2.94403	267646	90911.4	2.94403	176735	17.4312
124.9788@1.0159999	3	3	0.42062	1.45688	18.3616	18.81	-1.36455	1.36455	336819	459605	-1.36455	336819	459605	-1.36455	-122786	-16.9058
819.5853@13.302	3	3		87.1282	8.92494	0	486.042	486.042	486.042	1	486.042	486.042	1	486.042	485.042	8.92197
123.9566@16.477999	3	3	0.452492	0.227509	18.7437	18.5395	1.15211	1.15211	438961	381006	1.15211	438961	381006	1.15211	57955.5	15.8227
418.2413@3.748	3	3	1.67037	1.17292	17.2335	16.6586	1.48958	1.48958	154095	103449	1.48958	154095	103449	1.48958	50646.3	15.6282
199.0841@3.4979997	3	3	1.94607	3.16588	16.7291	15.6252	2.14929	2.14929	108633	50543.8	2.14929	108633	50543.8	2.14929	58089.6	15.826
638.2965@4.589	3	3	1.20739	1.53444	18.4553	17.9414	1.42784	1.42784	359409	251716	1.42784	359409	251716	1.42784	107694	16.7166
2121.1838@8.0	3	3	0.656078	0.178693	18.9582	19.1827	-1.16834	1.16834	509325	595064	-1.16834	509325	595064	-1.16834	-85739.2	-16.3877
278.1146@6.0750003	3	3	1.84044	1.59122	17.3215	18.051	-1.65806	1.65806	163790	271573	-1.65806	163790	271573	-1.65806	-107783	-16.7178
802.504@13.768	3	3	0.0723538	1.26163	18.0175	18.3891	-1.29381	1.29381	265343	343304	-1.29381	265343	343304	-1.29381	-77960.5	-16.2505
693.5006@13.156	3	3	1.86717	1.22258	18.2944	16.8971	2.634	2.634	321479	122050	2.634	321479	122050	2.634	199430	17.6055
1190.7817@12.415	3	3	0.774513	0.418778	17.9599	17.3249	1.55302	1.55302	254965	164173	1.55302	254965	164173	1.55302	90791.6	16.4703
143.0942@4.0229993	3	3	3.30841	3.68918	16.6617	14.927	3.32817	3.32817	103676	31151	3.32817	103676	31151	3.32817	72524.9	16.1462
224.1766@12.934	3	3	1.33318	4.86686	16.3283	15.232	2.13812	2.13812	82285	38484.8	2.13812	82285	38484.8	2.13812	43800.2	15.4186
313.1623@5.097	3	3	1.73193	1.39631	17.5603	18.1654	-1.52108	1.52108	193274	293986	-1.52109	193274	293986	-1.52109	-100712	-16.6199
380.1161@1.1590002	3	3	6.83361	5.2314	18.0554	16.424	3.09819	3.09819	272408	87925	3.09819	272408	87925	3.09819	184483	17.4931
794.4932@13.181	3	3		86.6053	10.641	0	1596.83	1596.83	1596.83	1	1596.83	1596.83	1	1596.83	1595.83	10.6401
542.3956@12.942999	3	3	2.27798	2.11671	18.3557	17.4017	1.93728	1.93728	335448	173155	1.93728	335448	173155	1.93728	162294	17.3082
206.1661@12.934999	3	3	0.402315	5.23687	16.0481	14.8343	2.31948	2.31948	67757.8	29212.5	2.31948	67757.8	29212.5	2.31948	38545.3	15.2343
392.1454@5.9150004	3	3	6.66064	0.936901	16.3417	15.2011	2.20471	2.20471	83051.7	37670.2	2.20471	83051.7	37670.2	2.20471	45381.5	15.4698
302.2306@3.9479995	3	3	3.7272	2.40098	16.6439	15.6087	2.04945	2.04945	102403	49966.2	2.04945	102403	49966.2	2.04945	52436.9	15.6783
460.3177@10.989999	3	3	2.57622	2.08223	14.9598	13.9697	1.98626	1.98626	31866.5	16043.5	1.98626	31866.5	16043.5	1.98626	15823	13.9497
327.1778@5.145	3	3	0.673623	2.0018	17.5125	18.2028	-1.61359	1.61359	186979	301706	-1.61359	186979	301706	-1.61359	-114728	-16.8079
957.6563@12.798001	3	3	0.624933	0.718372	18.326	17.6341	1.61541	1.61541	328598	203415	1.61541	328598	203415	1.61541	125183	16.9337
1242.283@3.1830003	3	3	0.389299	0.152761	18.5503	18.7667	-1.16184	1.16184	383871	445995	-1.16184	383871	445995	-1.16184	-62124	-15.9229
833.5631@13.112001	3	3	0.952561	9.19402	16.2512	18.1506	-3.73071	3.73071	78000.6	290998	-3.73071	78000.6	290998	-3.73071	-212997	-17.7005
333.287@7.043	3	3	4.76826	8.31079	15.8499	17.9644	-4.33047	4.33047	59060.5	255760	-4.33047	59060.5	255760	-4.33047	-196699	-17.5856
678.2726@1.0410001	3	3	2.38726	3.24444	17.3785	16.5785	1.7411	1.7411	170395	97866	1.7411	170395	97866	1.7411	72528.9	16.1463
141.9946@1.0159999	3	3	0.422069	1.66716	18.0515	18.5526	-1.41531	1.41531	271677	384507	-1.41531	271677	384507	-1.41531	-112830	-16.7838
232.1058@2.8290002	3	3	0.860318	0.232754	18.5347	18.2807	1.19258	1.19258	379766	318441	1.19258	379766	318441	1.19258	61325.2	15.9042
325.1371@3.9319997	3	3	0.799054	1.85407	17.5834	18.2234	-1.55833	1.55833	196397	306050	-1.55833	196397	306050	-1.55833	-109654	-16.7426
301.1994@3.3489995	3	3	0.943941	3.09062	16.3425	15.2182	2.17996	2.17996	83097	38118.6	2.17996	83097	38118.6	2.17996	44978.3	15.4569
218.0932@5.306	3	3	2.00195	2.84106	17.3426	18.1077	-1.69949	1.69949	166200	282456	-1.69949	166200	282456	-1.69949	-116255	-16.8269
532.3385@12.935999	3	3	1.6174	2.36118	18.1049	17.241	1.81987	1.81987	281911	154907	1.81987	281911	154907	1.81987	127004	16.9545
446.3859@15.669001	3	3	17.6734	10.3331	17.0796	13.4644	12.2537	12.2537	138504	11303.1	12.2537	138504	11303.1	12.2537	127201	16.9568
608.2922@10.541	3	3	2.62703	3.97877	17.5861	19.0683	-2.79383	2.79383	196761	549718	-2.79383	196761	549718	-2.79383	-352957	-18.4291
870.5297@12.783999	3	3	2.56898	2.45276	17.39	15.941	2.73021	2.73021	171761	62911.2	2.73021	171761	62911.2	2.73021	108850	16.732
678.3925@5.2970004	3	3	0.515237	1.91605	16.7768	16.0933	1.60612	1.60612	112288	69912.5	1.60612	112288	69912.5	1.60612	42375.2	15.3709
827.5947@14.4279995	3	3	0.42003	0.788262	18.6613	18.0413	1.53693	1.53693	414584	269748	1.53693	414584	269748	1.53693	144837	17.1441
250.094@4.721	3	3	3.99081	5.19198	16.6038	17.9607	-2.56119	2.56119	99599.1	255092	-2.56119	99599.1	255092	-2.56119	-155493	-17.2465
197.9324@1.0229999	3	3	1.12592	3.4015	17.5592	18.2622	-1.62784	1.62784	193135	314392	-1.62784	193135	314392	-1.62784	-121257	-16.8877
752.4843@13.111	3	3	0.95681	0.904748	18.2979	17.7955	1.41662	1.41662	322271	227493	1.41662	322271	227493	1.41662	94778.8	16.5323
752.5212@13.455	3	3	3.24229	1.79162	17.8457	16.3865	2.74944	2.74944	235547	85671.1	2.74944	235547	85671.1	2.74944	149876	17.1934
871.6208@14.377001	3	3	2.03261	3.96119	18.2376	17.1161	2.17577	2.17577	309079	142055	2.17577	309079	142055	2.17577	167024	17.3497
756.516@14.889002	3	3	4.20368	0.440939	18.5241	16.7537	3.41153	3.41153	376983	110503	3.41153	376983	110503	3.41153	266480	18.0237
804.5008@10.987	3	3	1.86188	0.609705	18.2056	16.7149	2.81024	2.81024	302292	107568	2.81024	302292	107568	2.81024	194724	17.5711
278.1586@1.1849998	3	3	0.886456	2.39451	16.7886	15.9812	1.7501	1.7501	113210	64687.6	1.7501	113210	64687.6	1.7501	48522.3	15.5664
1254.8358@13.255999	3	3	0.649369	0.364152	18.8073	18.4499	1.28117	1.28117	458747	358070	1.28117	458747	358070	1.28117	100677	16.6194
1150.789@15.643999	3	3	0.712926	0.727859	18.1501	17.8466	1.23409	1.23409	290884	235708	1.23409	290884	235708	1.23409	55176.5	15.7518
496.3902@12.941999	3	3	1.64813	3.12267	18.1106	17.1474	1.9496	1.9496	283022	145169	1.9496	283022	145169	1.9496	137853	17.0728
710.4739@7.3359995	3	3	3.2975	2.42406	18.1294	17.3299	1.74052	1.74052	286739	164744	1.74052	286739	164744	1.74052	121996	16.8965
284.1475@3.242	3	3	0.374338	0.236167	17.9525	18.179	-1.17003	1.17003	253652	296781	-1.17003	253652	296781	-1.17003	-43128.9	-15.3964
300.1463@4.353	3	3	1.12304	2.80695	16.1283	15.5368	1.50686	1.50686	71631.1	47536.7	1.50686	71631.1	47536.7	1.50686	24094.3	14.5564
284.1723@5.7179995	3	3	0.965132	3.53451	17.068	17.9396	-1.82967	1.82967	137394	251387	-1.82967	137394	251387	-1.82967	-113992	-16.7986
770.5307@13.305	3	3	1.14827	1.29814	18.1414	16.6381	2.8349	2.8349	289131	101990	2.8349	289131	101990	2.8349	187141	17.5138
127.0639@1.708	3	3	1.23477	0.817758	18.1946	17.6102	1.49936	1.49936	299991	200080	1.49936	299991	200080	1.49936	99911.7	16.6084
1242.2834@1.2510002	3	3	0.9569	1.51504	17.8562	18.5129	-1.57657	1.57657	237267	374067	-1.57657	237267	374067	-1.57657	-136800	-17.0617
958.582@12.673999	3	3	0.501791	0.965876	17.8448	16.664	2.26691	2.26691	235401	103842	2.26691	235401	103842	2.26691	131559	17.0054
492.2716@4.367	3	3	1.2116	1.49829	17.6503	18.3178	-1.58832	1.58832	205712	326738	-1.58832	205712	326738	-1.58832	-121025	-16.8849
253.109@4.4119997	3	3	2.48545	3.059	16.617	17.9763	-2.56565	2.56565	100512	257879	-2.56565	100512	257879	-2.56565	-157367	-17.2638
914.5558@12.759001	3	3	3.29383	3.00563	17.2642	16.2559	2.01163	2.01163	157416	78253.2	2.01163	157416	78253.2	2.01163	79163.1	16.2725
1027.6627@14.352	3	3	2.35301	1.07474	17.1431	17.8654	-1.64982	1.64982	144740	238794	-1.64982	144740	238794	-1.64982	-94054.4	-16.5212
179.08@3.9310002	3	3	0.516554	1.3602	17.6991	18.2636	-1.47892	1.47892	212788	314696	-1.47892	212788	314696	-1.47892	-101908	-16.6369
496.3385@8.793	3	3	1.5375	1.41945	17.7746	17.3229	1.36764	1.36764	224222	163947	1.36764	224222	163947	1.36764	60274.3	15.8793
536.274@9.344001	3	3	0.853865	6.62538	16.9057	18.2724	-2.57882	2.57882	122780	316628	-2.57882	122780	316628	-2.57882	-193848	-17.5646
319.1734@3.513	3	3	2.93677	3.81965	17.4353	15.9558	2.78854	2.78854	177233	63557.6	2.78854	177233	63557.6	2.78854	113675	16.7946
121.0886@4.119	3	3	0.707765	11.6923	15.7149	18.1223	-5.30548	5.30548	53783.2	285345	-5.30548	53783.2	285345	-5.30548	-231562	-17.821
258.1208@1.2329999	3	3	0.560214	3.17954	16.9381	17.7189	-1.71812	1.71812	125569	215742	-1.71812	125569	215742	-1.71812	-90172.9	-16.4604
285.1668@4.3079996	3	3	2.4189	2.0661	17.3268	16.4839	1.79372	1.79372	164399	91652.9	1.79372	164399	91652.9	1.79372	72746.5	16.1506
216.1473@1.1990001	3	3	0.997753	0.745048	17.5239	17.8425	-1.2471	1.2471	188463	235032	-1.2471	188463	235032	-1.2471	-46569.3	-15.5071
550.6315@4.7179995	3	3	0.236886	9.96176	15.7039	18.1722	-5.53407	5.53407	53376.2	295387	-5.53407	53376.2	295387	-5.53407	-242011	-17.8847
654.3561@5.334	3	3	3.90508	0.845601	17.2965	16.38	1.88766	1.88766	160983	85282	1.88766	160983	85282	1.88766	75701	16.208
334.1516@5.5709996	3	3	1.96408	10.4832	15.4317	17.6771	-4.74176	4.74176	44198.4	209578	-4.74176	44198.4	209578	-4.74176	-165380	-17.3354
884.6173@8.241999	3	3	2.20119	2.06997	16.3602	15.4478	1.88216	1.88216	84120.5	44693.6	1.88216	84120.5	44693.6	1.88216	39426.9	15.2669
487.2053@3.883	3	3	2.84679	2.05508	16.9911	15.7553	2.35517	2.35517	130268	55311.3	2.35517	130268	55311.3	2.35517	74956.3	16.1938
208.1203@3.973	3	3	0.441707	3.06453	17.3183	18.1031	-1.72277	1.72277	163432	281555	-1.72277	163432	281555	-1.72277	-118123	-16.8499
190.0984@5.3030005	3	3	1.8939	3.80068	16.8676	17.6858	-1.7632	1.7632	119577	210838	-1.7632	119577	210838	-1.7632	-91261	-16.4777
370.185@3.317	3	3	3.31406	8.43291	15.9009	17.614	-3.27881	3.27881	61184.2	200611	-3.27881	61184.2	200611	-3.27881	-139427	-17.0892
594.2767@9.346	3	3	0.967761	4.23712	16.9943	18.2908	-2.4563	2.4563	130553	320678	-2.4563	130553	320678	-2.4563	-190125	-17.5366
125.0838@3.3969998	3	3	1.19687	0.942662	17.5205	18.076	-1.46963	1.46963	188023	276323	-1.46963	188023	276323	-1.46963	-88300.6	-16.4301
442.3428@12.377999	3	3	1.14591	2.445	17.8355	17.2467	1.50401	1.50401	233900	155518	1.50401	233900	155518	1.50401	78382.2	16.2582
218.1266@3.0130002	3	3	5.84311	2.4791	17.2037	15.7184	2.79959	2.79959	150945	53916.7	2.79959	150945	53916.7	2.79959	97027.8	16.5661
342.2141@5.8569994	3	3	1.50919	1.30924	17.4616	17.0231	1.35521	1.35521	180491	133183	1.35521	180491	133183	1.35521	47307.8	15.5298
811.5632@14.843	3	3	3.0682	1.41766	16.7556	17.4607	-1.6303	1.6303	110646	180386	-1.6303	110646	180386	-1.6303	-69739.6	-16.0897
849.5939@12.380999	3	3	3.72153	4.59223	16.2944	17.5026	-2.31056	2.31056	80372.1	185704	-2.31056	80372.1	185704	-2.31056	-105332	-16.6846
758.4776@13.809999	3	3	1.43423	1.27608	17.6198	18.112	-1.40661	1.40661	201408	283302	-1.40661	201408	283302	-1.40661	-81894.3	-16.3215
359.1423@1.151	3	3	14.9203	10.8206	16.5916	12.8511	13.3655	13.3655	98755.5	7388.83	13.3655	98755.5	7388.83	13.3655	91366.7	16.4794
241.1423@3.355	3	3	1.96348	3.39942	16.5748	17.748	-2.25523	2.25523	97611.6	220137	-2.25523	97611.6	220137	-2.25523	-122525	-16.9027
814.4621@11.316001	3	3	1.81731	1.60432	17.5559	17.0628	1.40747	1.40747	192686	136902	1.40747	192686	136902	1.40747	55784.1	15.7676
1165.4473@3.1089997	3	3	2.25133	0.670821	17.9167	17.3428	1.48856	1.48856	247438	166227	1.48856	247438	166227	1.48856	81211.3	16.3094
204.114@5.3359995	3	3	0.641643	2.10342	17.3223	17.846	-1.43762	1.43762	163881	235598	-1.43762	163881	235598	-1.43762	-71717.4	-16.13
568.3928@14.477	3	3	0.463376	1.04612	17.5849	18.1244	-1.4534	1.4534	196605	285745	-1.4534	196605	285745	-1.4534	-89140.3	-16.4438
884.6172@7.741	3	3	5.50694	1.74039	15.7881	14.5199	2.40863	2.40863	56583.7	23492.1	2.40863	56583.7	23492.1	2.40863	33091.6	15.0142
218.1667@9.178	3	3	2.32122	2.83578	16.798	17.534	-1.66561	1.66561	113945	189788	-1.66561	113945	189788	-1.66561	-75843.1	-16.2107
216.1468@1.615	3	3	0.301147	0.683058	17.5715	17.8833	-1.24126	1.24126	194780	241773	-1.24126	194780	241773	-1.24126	-46992.4	-15.5201
213.0519@1.125	3	3	3.43214	2.56619	18.0064	16.3637	3.12269	3.12269	263318	84324.2	3.12269	263318	84324.2	3.12269	178994	17.4495
532.272@4.4059997	3	3	3.59744	1.58173	17.8991	16.9928	1.87427	1.87427	244444	130421	1.87427	244444	130421	1.87427	114023	16.799
503.2001@3.766	3	3	2.38012	0.555682	15.9674	14.569	2.63618	2.63618	64072.6	24305.1	2.63618	64072.6	24305.1	2.63618	39767.5	15.2793
574.3666@4.1930003	3	3	2.24628	2.21707	16.8928	15.9281	1.95162	1.95162	121684	62350.2	1.95162	121684	62350.2	1.95162	59333.6	15.8566
300.1309@4.354	3	3	1.1647	4.44514	15.9149	15.0557	1.81413	1.81413	61783.5	34056.8	1.81413	61783.5	34056.8	1.81413	27726.8	14.759
706.3907@12.513	3	3	173.205	29.3176	13.5061	3.96037	747.421	747.421	11634.7	15.5665	747.421	11634.7	15.5665	747.421	11619.2	13.5042
243.1074@1.1940001	3	3	2.56669	0.820837	17.1155	16.292	1.76981	1.76981	142002	80235.7	1.76981	142002	80235.7	1.76981	61765.9	15.9145
379.0885@1.0529999	3	3	1.72841	2.40718	17.8124	16.8933	1.89094	1.89094	230176	121725	1.89094	230176	121725	1.89094	108450	16.7267
738.5054@14.899	3	3	2.00748	0.636943	17.2698	15.7758	2.81661	2.81661	158025	56104.8	2.81661	158025	56104.8	2.81661	101921	16.6371
457.1943@3.742	3	3	1.01399	0.702564	15.4407	13.9686	2.77412	2.77412	44474.1	16031.8	2.77412	44474.1	16031.8	2.77412	28442.3	14.7957
1122.302@3.0779998	3	3	1.34979	6.63901	16.4152	17.8951	-2.78944	2.78944	87388.9	243766	-2.78944	87388.9	243766	-2.78944	-156377	-17.2547
448.2818@10.060999	3	3	1.65282	1.65696	18.1708	17.5077	1.58347	1.58347	295099	186361	1.58347	295099	186361	1.58347	108737	16.7305
1018.7109@12.736	3	3	0.411069	0.975543	17.5965	16.7202	1.8357	1.8357	198193	107966	1.8357	198193	107966	1.8357	90227.1	16.4613
200.1154@4.02	3	3	3.84206	4.62514	18.5768	16.645	3.81546	3.81546	391009	102480	3.81546	391009	102480	3.81546	288529	18.1384
1006.6389@15.819	3	3	3.7951	0.238456	18.2886	16.8886	2.63892	2.63892	320191	121334	2.63892	320191	121334	2.63892	198857	17.6014
305.1247@4.6129994	3	3	0.506999	0.420299	17.0728	17.3457	-1.20828	1.20828	137852	166563	-1.20828	137852	166563	-1.20828	-28711.6	-14.8093
809.5955@4.5729995	3	3	0.886604	1.08272	17.4538	17.793	-1.26505	1.26505	179523	227105	-1.26505	179523	227105	-1.26505	-47582.1	-15.5381
758.4927@11.157999	3	3	0.767519	4.93689	18.6878	16.4007	4.88093	4.88093	422277	86515.7	4.88093	422277	86515.7	4.88093	335761	18.3571
445.2319@3.1889997	3	3	4.99534	8.6101	15.0807	11.1992	14.7381	14.7381	34652	2351.19	14.7381	34652	2351.19	14.7381	32300.8	14.9793
284.1001@3.6880002	3	3	1.29375	4.00014	16.1618	17.1807	-2.02634	2.02634	73316.4	148564	-2.02634	73316.4	148564	-2.02634	-75247.8	-16.1994
290.1609@4.875	3	3	4.76081	3.42847	16.5363	15.1462	2.62096	2.62096	95043.9	36263	2.62096	95043.9	36263	2.62096	58780.8	15.8431
347.0627@1.615	3	3	4.58867	1.45165	17.6041	16.6211	1.97659	1.97659	199231	100795	1.97659	199231	100795	1.97659	98435.4	16.5869
122.0479@1.6470001	3	3	2.61101	5.61521	14.5779	15.71	-2.19176	2.19176	24455.6	53600.8	-2.19176	24455.6	53600.8	-2.19176	-29145.1	-14.831
374.2411@3.9030004	3	3	3.32754	2.65749	14.469	13.5145	1.93786	1.93786	22677.2	11702.2	1.93786	22677.2	11702.2	1.93786	10975.1	13.4219
720.4947@12.948999	3	3	31.2952	2.65167	19.8672	14.1239	53.5697	53.5697	956363	17852.7	53.5697	956363	17852.7	53.5697	938510	19.84
300.1502@4.355	3	3	0.973078	1.07921	16.2134	15.2563	1.9415	1.9415	75985.6	39137.6	1.9415	75985.6	39137.6	1.9415	36848	15.1693
272.1269@3.1660001	3	3	11.1571	10.8004	13.7434	10.8498	7.43086	7.43086	13713.9	1845.54	7.43086	13713.9	1845.54	7.43086	11868.4	13.5348
156.1256@14.831999	3	3	16.0789	5.69873	16.717	13.0492	12.7085	12.7085	107722	8476.38	12.7085	107722	8476.38	12.7085	99246	16.5987
1062.7365@12.692	3	3	2.05076	0.463073	17.5501	16.3329	2.32486	2.32486	191910	82547.1	2.32486	191910	82547.1	2.32486	109363	16.7388
803.5528@15.589998	3	3	2.46726	4.56615	17.0192	15.2583	3.38902	3.38902	132828	39193.8	3.38902	132828	39193.8	3.38902	93634.7	16.5148
188.1271@1.6109998	3	3	7.19654	5.09615	16.7855	14.9403	3.59298	3.59298	112960	31439	3.59298	112960	31439	3.59298	81520.9	16.3149
423.2357@6.388	3	3	1.58111	1.95319	17.0341	16.1193	1.88536	1.88536	134206	71183.4	1.88536	134206	71183.4	1.88536	63022.6	15.9436
459.2107@3.2830005	3	3	1.89155	1.17702	16.8629	15.9709	1.85573	1.85573	119188	64227.2	1.85573	119188	64227.2	1.85573	54960.9	15.7461
786.5233@13.056	3	3	173.205	4.75371	16.0043	4.72594	2483.91	2483.91	65733.1	26.4636	2483.91	65733.1	26.4636	2483.91	65706.6	16.0038
368.2552@6.924	3	3	2.76774	0.64828	17.2705	16.5645	1.63128	1.63128	158107	96922	1.63128	158107	96922	1.63128	61184.6	15.9009
490.3643@12.276	3	3	3.3122	2.00511	14.2977	15.2632	-1.95269	1.95269	20138.8	39324.8	-1.95269	20138.8	39324.8	-1.95269	-19186	-14.2278
762.3981@4.2459993	3	3	5.1682	1.71321	16.9254	15.5383	2.61553	2.61553	124467	47587.7	2.61553	124467	47587.7	2.61553	76879.6	16.2303
280.1052@3.692	3	3	2.43704	2.10711	16.3853	17.2604	-1.83406	1.83406	85599.7	156995	-1.83406	85599.7	156995	-1.83406	-71395.2	-16.1235
1001.6822@12.741999	3	3	0.958722	1.84298	17.8244	17.1559	1.58933	1.58933	232096	146034	1.58933	232096	146034	1.58933	86062.1	16.3931
768.4783@11.811999	3	3	12.8417	1.48484	17.9959	15.0999	7.44344	7.44344	261397	35117.8	7.44344	261397	35117.8	7.44344	226279	17.7877
475.2059@3.111	3	3	13.8095	4.96661	16.2533	12.8943	10.2609	10.2609	78116.9	7613.04	10.2609	78116.9	7613.04	10.2609	70503.9	16.1054
430.3431@14.8220005	3	3	6.42418	4.07254	15.1097	17.6656	-5.88046	5.88046	35355.7	207908	-5.88047	35355.7	207908	-5.88047	-172552	-17.3967
245.8547@16.64	3	3	2.10855	0.246711	18.0527	17.5505	1.41637	1.41637	271888	191961	1.41637	271888	191961	1.41637	79927.2	16.2864
331.149@1.618	3	3	0.194238	0.868394	17.2837	17.6463	-1.28569	1.28569	159561	205146	-1.28569	159561	205146	-1.28569	-45585.5	-15.4763
384.2371@3.9430003	3	3	3.01427	3.09583	17.276	16.3652	1.88006	1.88006	158710	84417.2	1.88006	158710	84417.2	1.88006	74292.3	16.1809
101.0836@4.478	3	3	1.92996	0.945431	17.0967	16.5013	1.51083	1.51083	140157	92768.1	1.51083	140157	92768.1	1.51083	47388.7	15.5323
753.465@14.650999	3	3	173.205	18.0099	14.7749	3.45068	2564.09	2564.09	28034.4	10.9335	2564.09	28034.4	10.9335	2564.09	28023.5	14.7744
791.5528@14.898	3	3	3.66295	0.613002	17.7128	16.6084	2.15012	2.15012	214831	99916.1	2.15012	214831	99916.1	2.15012	114915	16.8102
514.401@13.356001	3	3	9.87697	3.52193	15.1705	13.5412	3.09381	3.09381	36879.8	11920.5	3.09382	36879.8	11920.5	3.09382	24959.3	14.6073
432.3438@14.295	3	3	1.42732	1.51111	16.958	17.4953	-1.45124	1.45124	127309	184756	-1.45124	127309	184756	-1.45124	-57446.7	-15.8099
1130.8363@5.0820003	3	3	1.28633	0.648519	17.6093	17.9599	-1.27506	1.27506	199951	254950	-1.27506	199951	254950	-1.27506	-54998.8	-15.7471
756.5155@10.642999	3	3	3.71108	3.04915	14.9259	13.1434	3.44018	3.44018	31128.1	9048.38	3.44018	31128.1	9048.38	3.44018	22079.7	14.4304
700.4897@8.75	3	3	4.10929	2.88701	17.309	16.3322	1.96821	1.96821	162382	82502.7	1.96821	162382	82502.7	1.96821	79879.6	16.2855
319.1734@3.416	3	3	3.95086	3.87336	16.9323	15.581	2.55147	2.55147	125064	49016.3	2.55147	125064	49016.3	2.55147	76047.3	16.2146
550.9655@4.722	3	3	0.174625	10.1293	15.5247	17.9844	-5.50112	5.50112	47140.6	259326	-5.50112	47140.6	259326	-5.50112	-212185	-17.695
651.3446@5.3359995	3	3	1.72917	0.707077	17.0834	16.0728	2.0148	2.0148	138875	68927.4	2.0148	138875	68927.4	2.0148	69947.4	16.094
487.3858@14.794001	3	3	2.80812	3.56415	17.3277	16.1977	2.18858	2.18858	164501	75163.3	2.18858	164501	75163.3	2.18858	89337.4	16.447
922.5966@9.726999	3	3	7.77434	1.53781	17.2483	15.4451	3.48996	3.48996	155684	44609.2	3.48996	155684	44609.2	3.48996	111075	16.7612
426.2572@5.1860003	3	3	0.702599	2.53224	16.9595	17.4928	-1.44722	1.44722	127442	184436	-1.44722	127442	184436	-1.44722	-56993.9	-15.7985
868.4241@4.1930003	3	3	1.2034	3.94782	16.8102	17.8742	-2.0907	2.0907	114918	240260	-2.0907	114918	240260	-2.0907	-125342	-16.9355
303.1427@1.615	3	3	3.05446	2.791	16.4467	17.2934	-1.79837	1.79837	89322.1	160634	-1.79837	89322.1	160634	-1.79837	-71311.8	-16.1219
782.4965@12.204001	3	3	6.38511	4.34623	16.6819	14.7978	3.69131	3.69131	105135	28481.8	3.69131	105135	28481.8	3.69131	76653.3	16.2261
777.537@9.208	3	3	2.34836	0.469382	17.0616	17.6778	-1.53285	1.53285	136790	209679	-1.53285	136790	209679	-1.53285	-72888.8	-16.1534
540.2686@8.085	3	3	1.65702	8.27411	15.9733	17.5374	-2.95696	2.95696	64334.4	190234	-2.95696	64334.4	190234	-2.95696	-125900	-16.9419
616.341@4.4179997	3	3	2.26628	4.01705	19.2739	18.059	2.32131	2.32131	633921	273088	2.32131	633921	273088	2.32131	360833	18.461
127.0994@3.634	3	3	0.397511	1.17468	16.8169	16.3625	1.37013	1.37013	115446	84259.2	1.37013	115446	84259.2	1.37013	31186.4	14.9286
442.3428@12.564001	3	3	0.626004	2.52031	17.3177	16.3714	1.92687	1.92687	163360	84780	1.92687	163360	84780	1.92687	78580	16.2619
770.5306@13.456999	3	3	6.04895	1.74809	17.87	15.8844	3.96042	3.96042	239563	60489.4	3.96042	239563	60489.4	3.96042	179074	17.4502
230.1378@1.212:1	3	3	0.493432	0.648644	17.3587	17.0433	1.24442	1.24442	168074	135062	1.24442	168074	135062	1.24442	33012	15.0107
1092.678@14.995	3	3		87.1882	7.72501	0	211.573	211.573	211.573	1	211.573	211.573	1	211.573	210.573	7.71817
490.3642@12.324999	3	3	3.1147	1.55686	14.5476	15.3045	-1.6899	1.6899	23947.8	40469.4	-1.6899	23947.8	40469.4	-1.6899	-16521.6	-14.0121
188.1159@3.3989997	3	3	0.743172	0.590141	16.8954	17.4032	-1.4219	1.4219	121906	173338	-1.4219	121906	173338	-1.4219	-51431.8	-15.6504
583.3196@4.765	3	3	1.21813	3.61372	16.5359	15.3215	2.32035	2.32035	95014	40948.1	2.32035	95014	40948.1	2.32035	54065.9	15.7224
312.2657@8.938001	3	3	3.22614	5.02028	15.3603	17.2968	-3.82773	3.82773	42064.3	161011	-3.82773	42064.3	161011	-3.82773	-118947	-16.86
331.1486@1.203	3	3	0.454736	0.703902	17.0199	17.5321	-1.42626	1.42626	132893	189540	-1.42626	132893	189540	-1.42626	-56647.1	-15.7897
101.0837@4.0180006:2	3	3	3.83017	4.54035	17.7661	15.8497	3.77487	3.77487	222910	59051	3.77487	222910	59051	3.77487	163859	17.3221
286.1514@5.1650004	3	3	1.84885	1.86242	16.1897	17.0447	-1.80878	1.80878	74746.9	135200	-1.80878	74746.9	135200	-1.80878	-60453.6	-15.8835
1002.6078@12.611	3	3	3.97969	3.02522	17.8184	16.3451	2.77649	2.77649	231133	83246.6	2.77649	231133	83246.6	2.77649	147887	17.1741
428.3279@12.938002	3	3	6.5857	3.10617	18.7105	17.1443	2.9611	2.9611	428959	144865	2.9611	428959	144865	2.9611	284094	18.116
289.1267@3.1620002	3	3	0.93693	1.16203	16.8717	16.4933	1.29988	1.29988	119920	92254.8	1.29988	119920	92254.8	1.29988	27665	14.7558
818.5136@8.615999	3	3	1.76476	1.41575	16.7492	17.254	-1.41886	1.41886	110159	156300	-1.41886	110159	156300	-1.41886	-46140.9	-15.4938
432.138@5.9130006	3	3	3.33588	1.5293	15.847	14.4112	2.7054	2.7054	58941.3	21786.6	2.7054	58941.3	21786.6	2.7054	37154.8	15.1813
216.1505@5.8100004	3	3	2.2584	2.30144	16.2577	17.046	-1.72702	1.72702	78351.1	135314	-1.72702	78351.1	135314	-1.72702	-56962.8	-15.7977
100.9568@16.481	3	3	0.323365	0.22797	17.5301	17.3398	1.14104	1.14104	189273	165878	1.14104	189273	165878	1.14104	23395.2	14.5139
435.2209@1.382	3	3	6.50436	5.03967	16.1689	14.1164	4.14816	4.14816	73673.9	17760.7	4.14816	73673.9	17760.7	4.14816	55913.3	15.7709
370.2322@1.3050001	3	3	2.91657	1.2915	17.4138	16.179	2.35352	2.35352	174615	74193.3	2.35352	174615	74193.3	2.35352	100422	16.6157
345.1531@3.3600001	3	3	1.8302	1.00531	17.0115	17.4453	-1.35074	1.35074	132125	178467	-1.35074	132125	178467	-1.35074	-46341.8	-15.5
465.4283@15.384001	3	3	4.84302	5.13539	16.9975	15.1131	3.69205	3.69205	130843	35439.2	3.69205	130843	35439.2	3.69205	95404.1	16.5418
346.0939@1.6130002	3	3	1.18035	0.692359	16.5474	16.0476	1.41411	1.41411	95780.6	67732.1	1.41411	95780.6	67732.1	1.41411	28048.5	14.7756
301.1995@3.706	3	3	1.67321	1.52366	15.7599	15.1726	1.50244	1.50244	55486.8	36931.2	1.50244	55486.8	36931.2	1.50244	18555.6	14.1796
506.2173@4.5309997	3	3	1.97224	3.06622	16.0699	17.2706	-2.29844	2.29844	68790.3	158110	-2.29844	68790.3	158110	-2.29844	-89319.9	-16.4467
1844.4517@3.1790001	3	3	1.31258	0.11787	17.2741	17.7044	-1.34752	1.34752	158493	213572	-1.34752	158493	213572	-1.34752	-55079.2	-15.7492
394.0879@1.1289998	3	3	7.60983	2.13152	17.3902	14.5373	7.22424	7.22424	171776	23777.7	7.22424	171776	23777.7	7.22424	147998	17.1752
414.3121@12.935999	3	3	2.55685	1.46843	17.1364	16.3784	1.69115	1.69115	144071	85191.6	1.69115	144071	85191.6	1.69115	58879.8	15.8455
628.468@12.93	3	3	1.96066	2.3095	17.5547	16.5501	2.00643	2.00643	192531	95956.6	2.00643	192531	95956.6	2.00643	96573.9	16.5593
716.1805@7.0509996	3	3	173.205	10.4053	16.5717	4.77247	3563.92	3563.92	97405.8	27.3311	3563.92	97405.8	27.3311	3563.92	97378.5	16.5713
293.137@1.6920002	3	3	0.498834	0.539053	17.0931	17.2902	-1.14642	1.14642	139805	160275	-1.14642	139805	160275	-1.14642	-20470.3	-14.3212
250.1194@5.2809997	3	3	1.04948	3.29569	16.2398	16.925	-1.60786	1.60786	77388.7	124430	-1.60786	77388.7	124430	-1.60786	-47041.6	-15.5216
222.161@12.941999	3	3	8.81898	2.13634	14.9385	12.6153	5.00447	5.00447	31400.5	6274.49	5.00447	31400.5	6274.49	5.00447	25126	14.6169
543.3002@3.749	3	3	4.84383	4.10468	16.9424	15.51	2.69891	2.69891	125938	46662.5	2.69891	125938	46662.5	2.69891	79275.2	16.2746
448.2195@5.6829996	3	3	1.98954	7.10201	15.1255	17.194	-4.19441	4.19441	35746.7	149936	-4.19441	35746.7	149936	-4.19441	-114190	-16.8011
157.0331@1.1210002	3	3	6.15155	2.84591	16.6584	15.0399	3.07045	3.07045	103437	33687.8	3.07045	103437	33687.8	3.07045	69748.9	16.0899
1176.6688@4.7190003	3	3	0.486791	9.79149	14.9249	17.2982	-5.18125	5.18125	31105.8	161167	-5.18125	31105.8	161167	-5.18125	-130061	-16.9888
640.118@3.173	3	3	1.11852	0.430017	19.8043	20.4019	-1.51316	1.51316	915563	1.38539e+06	-1.51316	915563	1.38539e+06	-1.51316	-469829	-18.8418
277.1303@5.6139994	3	3	1.63548	3.2921	16.5281	15.8461	1.60437	1.60437	94505.6	58905.1	1.60437	94505.6	58905.1	1.60437	35600.5	15.1196
605.4489@13.259001	3	3	2.82557	0.76294	18.2349	16.9805	2.38576	2.38576	308500	129309	2.38576	308500	129309	2.38576	179191	17.4511
172.0051@1.012	3	3	0.439341	1.68889	16.9819	17.5057	-1.43768	1.43768	129439	186092	-1.43768	129439	186092	-1.43768	-56652.5	-15.7899
343.8684@1.0270001	3	3	1.3745	3.54246	16.3798	17.3503	-1.95945	1.95945	85274.8	167092	-1.95945	85274.8	167092	-1.95945	-81816.9	-16.3201
331.1751@4.1959996	3	3	3.84547	1.83259	16.5743	15.6909	1.84467	1.84467	97577.6	52897.2	1.84466	97577.6	52897.2	1.84466	44680.4	15.4474
158.1055@2.983	3	3	0.41393	0.548626	17.6366	17.9715	-1.26127	1.26127	203771	257010	-1.26127	203771	257010	-1.26127	-53239.2	-15.7002
482.2355@4.7550006	3	3	2.55361	5.22079	16.6646	14.705	3.88956	3.88956	103885	26708.6	3.88956	103885	26708.6	3.88956	77175.9	16.2359
768.5155@12.558999	3	3	0.436001	1.81629	16.6908	15.6952	1.99397	1.99397	105789	53054.3	1.99397	105789	53054.3	1.99397	52734.5	15.6865
329.2047@3.8930001	3	3	0.174056	1.17302	16.9153	17.1947	-1.21369	1.21369	123597	150009	-1.21369	123597	150009	-1.21369	-26412	-14.6889
949.5747@11.486	3	3	0.946105	7.66357	15.7807	17.3653	-2.9992	2.9992	56294.9	168840	-2.9992	56294.9	168840	-2.9992	-112545	-16.7801
260.1039@6.077	3	3	1.73476	1.14788	15.6263	16.3657	-1.66946	1.66946	50580.6	84442.3	-1.66946	50580.6	84442.3	-1.66946	-33861.7	-15.0474
466.2412@3.8469996	3	3	0.475175	0.430792	17.1142	17.3924	-1.21265	1.21265	141869	172038	-1.21265	141869	172038	-1.21265	-30168.3	-14.8807
1176.7672@14.189001	3	3	1.94549	6.51416	15.5619	16.8057	-2.36809	2.36809	48373.8	114554	-2.36809	48373.8	114554	-2.36809	-66180	-16.0141
142.9512@16.479002	3	3	0.498451	0.206937	17.5727	17.332	1.18159	1.18159	194944	164984	1.18159	194944	164984	1.18159	29959.4	14.8707
185.0683@1.6130002	3	3	0.649	2.57801	17.1743	16.5937	1.49551	1.49551	147909	98901.6	1.49551	147909	98901.6	1.49551	49007.1	15.5807
678.0791@1.2369999	3	3	0.767937	1.86148	17.427	17.0207	1.32527	1.32527	176214	132964	1.32527	176214	132964	1.32527	43249.5	15.4004
137.0467@3.7470002	3	3	2.3431	0.310101	16.558	15.8257	1.66126	1.66126	96483.4	58078.4	1.66126	96483.4	58078.4	1.66126	38405	15.229
131.0938@4.3870006	3	3	0.176817	1.27757	16.0877	16.3846	-1.22856	1.22856	69641.1	85558.2	-1.22856	69641.1	85558.2	-1.22856	-15917.1	-13.9583
210.0996@3.6839995	3	3	1.02657	0.719827	16.6764	17.0115	-1.26146	1.26146	104734	132117	-1.26146	104734	132117	-1.26146	-27383.7	-14.741
461.3859@16.067	3	3		86.6026	10.8193	0	1806.87	1806.87	1806.87	1	1806.87	1806.87	1	1806.87	1805.87	10.8185
442.2411@4.0120006	3	3	4.73937	3.8012	15.16	13.2488	3.76134	3.76134	36611.7	9733.69	3.76134	36611.7	9733.69	3.76134	26878.1	14.7141
709.4954@13.843	3	3	0.985356	0.723678	17.7689	17.2439	1.43894	1.43894	223339	155211	1.43894	223339	155211	1.43894	68128.6	16.056
610.4578@13.359999	3	3		1.66435	14.0511	0	16974.2	16974.2	16974.2	1	16974.2	16974.2	1	16974.2	16973.2	14.051
101.0836@4.584	3	3	2.70092	2.52722	16.7625	15.5032	2.39387	2.39387	111178	46443	2.39387	111178	46443	2.39387	64735.5	15.9823
723.5112@14.99	3	3	1.9126	1.08004	16.5046	17.3202	-1.75996	1.75996	92979.4	163640	-1.75996	92979.4	163640	-1.75996	-70661	-16.1086
789.5379@15.751001	3	3	11.0733	2.42034	16.9291	13.854	8.42694	8.42694	124782	14807.6	8.42694	124782	14807.6	8.42694	109975	16.7468
726.4686@7.752	3	3	0.570003	0.784691	16.3781	16.6139	-1.17755	1.17755	85173.7	100296	-1.17755	85173.7	100296	-1.17755	-15122.3	-13.8844
924.606@12.892	3	3	3.64255	6.72422	14.9215	16.2848	-2.57269	2.57269	31033.7	79840	-2.57269	31033.7	79840	-2.57269	-48806.3	-15.5748
770.4932@12.270999	3	3	1.052	2.11911	16.7709	16.1215	1.56851	1.56851	111827	71295.1	1.56851	111827	71295.1	1.56851	40532.3	15.3068
1263.8247@13.501001	3	3	0.406275	0.744065	17.5687	17.2541	1.24372	1.24372	194410	156313	1.24372	194410	156313	1.24372	38096.3	15.2174
514.3278@13.300001	3	3	4.0603	5.50742	15.0302	13.5778	2.73655	2.73655	33461.1	12227.5	2.73655	33461.1	12227.5	2.73655	21233.6	14.3741
426.2141@6.0849996	3	3	5.97051	1.42249	17.2644	15.7395	2.87771	2.87771	157432	54707.5	2.87771	157432	54707.5	2.87771	102725	16.6484
453.4284@15.932001	3	3	173.205	3.60919	17.1456	4.26406	7546.27	7546.27	144992	19.2137	7546.27	144992	19.2137	7546.27	144972	17.1454
388.3175@14.301	3	3	0.720097	0.760782	16.9105	17.3979	-1.40185	1.40185	123190	172694	-1.40185	123190	172694	-1.40185	-49504	-15.5953
511.1575@5.2330003	3	3	1.0422	0.511496	17.0538	17.4596	-1.3248	1.3248	136053	180242	-1.3248	136053	180242	-1.3248	-44189.6	-15.4314
300.2155@3.426	3	3	2.96942	5.12934	15.1319	13.847	2.43676	2.43676	35905.8	14735	2.43676	35905.8	14735	2.43676	21170.7	14.3698
199.0841@4.1370006	3	3	0.928168	2.46411	16.4789	15.8961	1.49768	1.49768	91333.7	60983.4	1.49768	91333.7	60983.4	1.49768	30350.3	14.8894
718.1785@7.044999	3	3	173.205	10.1197	16.3279	4.6688	3233.98	3233.98	82259.8	25.4361	3233.98	82259.8	25.4361	3233.98	82234.4	16.3275
143.0582@1.189	3	3	2.25494	4.08608	15.6965	16.9258	-2.34467	2.34467	53101.1	124505	-2.34467	53101.1	124505	-2.34467	-71403.6	-16.1237
408.3704@16.350002	3	3		11.0085	15.0944	0	34983	34983	34983	1	34983	34983	1	34983	34982	15.0943
276.132@3.256	3	3	1.42326	0.108883	16.611	16.9789	-1.2905	1.2905	100091	129168	-1.2905	100091	129168	-1.2905	-29076.6	-14.8276
292.1091@1.6849997	3	3	4.80097	4.67631	14.8481	16.6156	-3.40445	3.40445	29494.2	100411	-3.40445	29494.2	100411	-3.40445	-70917.3	-16.1138
656.2831@6.4210005	3	3	2.02842	1.67837	17.375	16.7895	1.50058	1.50058	169985	113280	1.50058	169985	113280	1.50058	56705	15.7912
234.1611@5.8100004	3	3	2.00804	3.33049	15.5116	16.2353	-1.65148	1.65148	46713.8	77146.8	-1.65148	46713.8	77146.8	-1.65148	-30433	-14.8933
439.2398@5.2169995	3	3	0.540902	1.15966	17.1532	17.5	-1.27179	1.27179	145753	185368	-1.27179	145753	185368	-1.27179	-39614.4	-15.2737
894.4715@12.221	3	3	0.896155	6.54612	15.0737	17.1411	-4.19109	4.19109	34486.6	144537	-4.19109	34486.6	144537	-4.19109	-110050	-16.7478
503.2407@6.686	3	3	0.487714	0.581265	17.1453	17.4281	-1.21658	1.21658	144958	176353	-1.21658	144958	176353	-1.21658	-31395.4	-14.9383
119.0727@3.966	3	3	0.220986	1.71875	16.5938	16.9564	-1.28572	1.28572	98907.2	127167	-1.28572	98907.2	127167	-1.28572	-28259.3	-14.7864
399.199@4.5120006	3	3	5.55354	4.58241	15.829	14.2672	2.95215	2.95215	58210.4	19718	2.95215	58210.4	19718	2.95215	38492.4	15.2323
305.1584@2.399	3	3	18.2926	8.36618	17.0365	13.0747	15.5812	15.5812	134426	8627.5	15.5812	134426	8627.5	15.5812	125799	16.9408
592.4462@12.938002	3	3	2.51507	1.56286	17.1763	15.7776	2.63654	2.63654	148106	56174.3	2.63654	148106	56174.3	2.63654	91931.4	16.4883
384.2361@3.9500003	3	3	4.72634	2.94863	17.3297	15.9032	2.68798	2.68798	164725	61282.1	2.68798	164725	61282.1	2.68798	103443	16.6585
431.1648@1.158	3	3	3.01341	2.70061	15.9105	16.6788	-1.70325	1.70325	61594.3	104911	-1.70325	61594.3	104911	-1.70325	-43316.3	-15.4026
350.2445@6.9229994	3	3	3.36185	0.474902	16.7322	15.9905	1.67216	1.67216	108869	65106.6	1.67216	108869	65106.6	1.67216	43762.3	15.4174
112.0636@1.2989999	3	3	0.820334	4.31917	16.5538	15.6322	1.89419	1.89419	96201.4	50787.5	1.89419	96201.4	50787.5	1.89419	45413.8	15.4708
524.3852@12.939001	3	3	4.7588	2.51743	17.094	16.1219	1.96162	1.96162	139894	71315.6	1.96162	139894	71315.6	1.96162	68578.6	16.0655
944.5659@14.462	3	3	2.248	2.30286	15.8344	16.8609	-2.03706	2.03706	58430.1	119025	-2.03706	58430.1	119025	-2.03706	-60595.3	-15.8869
503.33@3.907	3	3	5.19292	3.51425	16.9673	15.0262	3.84011	3.84011	128137	33368.1	3.84011	128137	33368.1	3.84011	94769	16.5321
531.29@4.4469995	3	3	5.14169	2.17017	17.7893	16.6878	2.14583	2.14583	226526	105566	2.14583	226526	105566	2.14583	120960	16.8842
664.2744@3.987	3	3	2.33235	2.29787	16.491	17.5416	-2.07133	2.07133	92106.3	190783	-2.07133	92106.3	190783	-2.07133	-98676.4	-16.5904
777.5316@14.265001	3	3	0.919446	0.761216	16.4065	16.868	-1.37693	1.37693	86866.2	119609	-1.37693	86866.2	119609	-1.37693	-32742.9	-14.9989
484.3024@7.7090006	3	3	2.6941	1.15183	16.9853	16.385	1.51602	1.51602	129739	85578.8	1.51602	129739	85578.8	1.51602	44160.3	15.4305
210.1357@4.7750006	3	3	0.872013	2.26547	16.3305	15.2463	2.12034	2.12034	82410.9	38866.9	2.12034	82410.9	38866.9	2.12034	43544	15.4102
737.5267@13.261	3	3	173.205	8.53205	14.3551	4.01183	1299.11	1299.11	20956.9	16.1317	1299.11	20956.9	16.1317	1299.11	20940.8	14.354
278.1587@1.3409998	3	3	173.205	3.91541	14.9845	4.38314	1553.57	1553.57	32418.1	20.8669	1553.57	32418.1	20.8669	1553.57	32397.2	14.9836
303.2919@8.392999	3	3	3.77095	0.696645	14.818	15.6377	-1.76499	1.76499	28884.7	50981.3	-1.76499	28884.7	50981.3	-1.76499	-22096.5	-14.4315
204.1507@12.940001	3	3	7.18428	0.256158	15.0667	13.9144	2.22274	2.22274	34319.5	15440.2	2.22274	34319.5	15440.2	2.22274	18879.3	14.2045
821.5271@10.854001	3	3	1.89476	3.10559	14.961	16.9084	-3.85674	3.85674	31894.1	123007	-3.85674	31894.1	123007	-3.85674	-91113.2	-16.4754
556.3749@8.153	3	3	1.11122	1.26577	17.2501	16.499	1.68301	1.68301	155879	92619.1	1.68301	155879	92619.1	1.68301	63259.9	15.949
218.1659@5.126	3	3	0.792694	1.46882	16.3165	16.6932	-1.29837	1.29837	81612.1	105963	-1.29837	81612.1	105963	-1.29837	-24350.7	-14.5717
334.0796@5.3250003	3	3	0.984788	3.0839	16.3481	16.9797	-1.54929	1.54929	83421.2	129244	-1.54929	83421.2	129244	-1.54929	-45822.8	-15.4838
297.303@15.677	3	3	173.205	9.45961	13.7675	4.57274	586	586	13945.3	23.7975	586	13945.3	23.7975	586	13921.5	13.765
170.0214@3.1830003	3	3	1.08668	0.808616	16.8454	17.1687	-1.25124	1.25124	117751	147334	-1.25124	117751	147334	-1.25124	-29583.4	-14.8525
833.5982@13.315001	3	3	6.5035	1.01075	17.1561	15.2179	3.83237	3.83237	146053	38110.4	3.83237	146053	38110.4	3.83237	107943	16.7199
284.2347@7.547	3	3	1.67458	10.853	14.9679	16.8277	-3.62953	3.62953	32048	116319	-3.62953	32048	116319	-3.62953	-84271.2	-16.3628
756.5158@7.350999	3	3	2.89525	1.2779	16.8601	16.2163	1.56244	1.56244	118957	76135.4	1.56244	118957	76135.4	1.56244	42821.9	15.3861
224.1521@3.5420003	3	3	2.76957	0.59007	15.5342	16.2235	-1.61247	1.61247	47453.2	76517.1	-1.61247	47453.2	76517.1	-1.61247	-29063.8	-14.8269
617.218@1.229	3	3	1.94982	0.75221	16.728	16.2453	1.39738	1.39738	108551	77682.2	1.39738	108551	77682.2	1.39738	30869.3	14.9139
442.3432@12.564001	3	3	0.596064	3.0235	17.192	16.45	1.67245	1.67245	149727	89525.1	1.67245	149727	89525.1	1.67245	60201.5	15.8775
392.3063@11.999	3	3	1.32636	1.14279	17.489	17.1039	1.30595	1.30595	183957	140861	1.30595	183957	140861	1.30595	43096	15.3953
182.1049@3.3390002	3	3	1.67281	2.0958	16.4743	17.0202	-1.4599	1.4599	91045.9	132918	-1.4599	91045.9	132918	-1.4599	-41872.4	-15.3537
181.0597@3.1609998	3	3	1.71313	0.168724	17.1901	16.75	1.35671	1.35671	149536	110219	1.35671	149536	110219	1.35671	39316.8	15.2629
106.0778@12.002999	3	3	0.50023	0.68518	16.9055	16.6059	1.23075	1.23075	122759	99743.6	1.23075	122759	99743.6	1.23075	23015.8	14.4903
1220.7948@14.143	3	3	2.68531	2.92041	15.8524	16.7701	-1.88905	1.88905	59163.9	111763	-1.88905	59163.9	111763	-1.88905	-52599.5	-15.6828
537.4227@14.261	3	3	0.882777	0.572524	17.1254	17.3915	-1.20252	1.20252	142975	171931	-1.20252	142975	171931	-1.20252	-28955.2	-14.8215
817.568@14.416	3	3	3.09074	1.31743	16.8071	15.7605	2.06554	2.06554	114665	55513.2	2.06554	114665	55513.2	2.06554	59151.8	15.8521
185.0683@1.219	3	3	1.28791	0.827486	16.315	17.0713	-1.68915	1.68915	81528.9	137714	-1.68915	81528.9	137714	-1.68915	-56185.5	-15.7779
308.158@1.38	3	3	5.60634	4.38599	15.6103	13.8885	3.29861	3.29861	50024.3	15165.3	3.29861	50024.3	15165.3	3.29861	34859	15.0892
856.5296@10.891	3	3	2.29572	0.185761	16.706	15.9158	1.72935	1.72935	106910	61821	1.72935	106910	61821	1.72935	45089.3	15.4605
298.1997@3.5610003	3	3	3.9524	2.93572	15.7517	14.4445	2.47458	2.47458	55172.7	22295.8	2.47458	55172.7	22295.8	2.47458	32876.9	15.0048
428.328@14.895002	3	3	1.4737	0.390885	16.982	15.7242	2.39129	2.39129	129444	54131.3	2.39129	129444	54131.3	2.39129	75312.3	16.2006
754.5002@14.423998	3	3	2.32099	3.11192	16.3288	14.8935	2.70428	2.70428	82309.9	30436.9	2.70428	82309.9	30436.9	2.70428	51873	15.6627
219.0886@6.0929995	3	3	3.29872	1.98866	16.5705	15.573	1.99665	1.99665	97326.8	48744.9	1.99665	97326.8	48744.9	1.99665	48581.8	15.5681
498.3515@14.289	3	3	1.37656	1.24013	16.6625	17.1345	-1.387	1.387	103733	143878	-1.387	103733	143878	-1.387	-40144.7	-15.2929
454.3436@10.746001	3	3	2.17841	2.91276	16.6414	15.8882	1.68549	1.68549	102223	60648.9	1.68549	102223	60648.9	1.68549	41574.3	15.3434
768.4803@12.283999	3	3	6.73326	1.10852	17.2253	15.74	2.79987	2.79987	153229	54727.2	2.79987	153229	54727.2	2.79987	98502	16.5879
361.0931@3.6059995	3	3	1.04092	2.32902	16.2099	17.1213	-1.88093	1.88093	75797.8	142571	-1.88093	75797.8	142571	-1.88093	-66772.8	-16.027
326.2816@9.933999	3	3	1.49839	20.1249	12.9626	16.2185	-9.55275	9.55275	7982.1	76250.9	-9.55275	7982.1	76250.9	-9.55275	-68268.9	-16.0589
459.1606@3.1849997	3	3	2.22004	2.41967	14.7506	13.7259	2.03444	2.03444	27565	13549.2	2.03444	27565	13549.2	2.03444	14015.9	13.7748
430.2164@3.396	3	3	1.27563	0.419028	16.1501	16.5329	-1.30387	1.30387	72723.8	94822.5	-1.30387	72723.8	94822.5	-1.30387	-22098.7	-14.4317
180.1003@1.714	3	3	0.748007	1.55598	15.52	16.0778	-1.47195	1.47195	46989.3	69165.7	-1.47195	46989.3	69165.7	-1.47195	-22176.4	-14.4367
552.2232@3.709	3	3	1.01917	1.2165	16.1817	16.9409	-1.69256	1.69256	74334	125815	-1.69256	74334	125815	-1.69256	-51480.9	-15.6517
833.5983@13.456999	3	3	2.51874	1.08368	16.7608	15.9999	1.69458	1.69458	111045	65529.4	1.69458	111045	65529.4	1.69458	45515.7	15.4741
1066.7659@16.033003	3	3	0.80313	0.372875	17.5092	17.2497	1.19705	1.19705	186546	155838	1.19705	186546	155838	1.19705	30708.1	14.9063
854.5143@11.288001	3	3	2.34167	0.510632	16.9688	16.1989	1.70515	1.70515	128265	75222.4	1.70515	128265	75222.4	1.70515	53043	15.6949
595.3093@4.3279996	3	3	2.55893	5.11503	15.9474	17.0632	-2.16707	2.16707	63191.1	136939	-2.16707	63191.1	136939	-2.16707	-73748.2	-16.1703
618.3564@4.0499997	3	3	3.73119	4.89194	16.5241	15.3863	2.20044	2.20044	94242.7	42829	2.20044	94242.7	42829	2.20044	51413.7	15.6499
768.4783@12.72	3	3	4.22326	3.09179	16.4033	15.4603	1.92264	1.92264	86675.8	45081.6	1.92264	86675.8	45081.6	1.92264	41594.2	15.3441
763.506@14.663	3	3	2.11352	0.7013	16.1103	16.5637	-1.36932	1.36932	70740.9	96867.3	-1.36932	70740.9	96867.3	-1.36932	-26126.4	-14.6732
352.308@8.630999	3	3	6.51998	5.75278	14.0736	15.582	-2.84491	2.84491	17241.5	49050.5	-2.84491	17241.5	49050.5	-2.84491	-31809	-14.9571
341.1325@1.0270001	3	3	1.61233	2.92027	16.5073	15.5243	1.97669	1.97669	93154.4	47126.5	1.97669	93154.4	47126.5	1.97669	46027.9	15.4902
856.5138@14.573	3	3	2.07962	1.97593	15.9414	16.6725	-1.65992	1.65992	62927.5	104455	-1.65992	62927.5	104455	-1.65992	-41527	-15.3418
472.2578@9.979001	3	3	4.1221	4.27232	16.6989	15.5363	2.23867	2.23867	106382	47520.3	2.23867	106382	47520.3	2.23867	58861.7	15.845
629.2515@3.0300002	3	3	2.87666	2.33192	16.7593	15.5925	2.24522	2.24522	110934	49409	2.24522	110934	49409	2.24522	61525.3	15.9089
819.5835@14.895002	3	3	1.42257	0.422505	17.273	16.3975	1.8346	1.8346	158374	86326.5	1.8346	158374	86326.5	1.8346	72047.9	16.1367
813.543@13.454	3	3		87.3205	9.85703	0	927.39	927.39	927.39	1	927.39	927.39	1	927.39	926.39	9.85548
496.3173@12.933001	3	3	1.79474	0.929563	16.8707	15.9933	1.83702	1.83702	119835	65233.6	1.83702	119835	65233.6	1.83702	54601.9	15.7367
904.7317@4.9759994	3	3	2.19447	3.17614	15.9145	16.8439	-1.90446	1.90446	61766.6	117632	-1.90446	61766.6	117632	-1.90446	-55865.7	-15.7697
473.8262@1.0270001	3	3	1.86291	4.78862	15.6014	16.831	-2.345	2.345	49715.8	116584	-2.345	49715.8	116584	-2.345	-66867.9	-16.029
156.126@3.5120006	3	3	0.954791	0.823222	15.1905	15.7498	-1.47353	1.47353	37393.3	55100	-1.47353	37393.3	55100	-1.47353	-17706.7	-14.112
760.4673@4.2200003	3	3	3.7347	7.58205	15.2837	13.4296	3.61527	3.61527	39888.7	11033.4	3.61527	39888.7	11033.4	3.61527	28855.3	14.8165
800.4455@10.918	3	3	0.965696	2.61824	16.7749	16.2259	1.46307	1.46307	112136	76644.2	1.46307	112136	76644.2	1.46307	35491.7	15.1152
313.1987@4.6679997	3	3	2.97027	9.77396	14.674	16.4376	-3.39549	3.39549	26140.5	88759.9	-3.39549	26140.5	88759.9	-3.39549	-62619.4	-15.9343
580.261@8.386001	3	3	5.64774	1.5342	15.823	16.9709	-2.21588	2.21588	57970.2	128455	-2.21588	57970.2	128455	-2.21588	-70484.6	-16.105
722.1795@1.163	3	3	1.7115	3.69069	16.0959	16.9187	-1.76888	1.76888	70040.9	123894	-1.76888	70040.9	123894	-1.76888	-53853.2	-15.7167
459.2102@3.796	3	3	3.17749	4.73102	14.6536	10.7424	15.0449	15.0449	25772.7	1713.05	15.0449	25772.7	1713.05	15.0449	24059.6	14.5543
632.3883@6.3629994	3	3	3.05686	0.601316	17.0021	16.1518	1.80291	1.80291	131264	72806.6	1.80291	131264	72806.6	1.80291	58457.1	15.8351
221.0684@3.3259997	3	3	4.99724	2.19429	16.5571	15.0033	2.93582	2.93582	96421	32842.9	2.93582	96421	32842.9	2.93582	63578.1	15.9562
646.4797@12.934	3	3	1.96824	2.27875	17.0006	16.2926	1.63358	1.63358	131129	80270.8	1.63358	131129	80270.8	1.63358	50857.9	15.6342
192.1503@12.003999	3	3	0.293299	0.530202	16.5207	16.2766	1.18435	1.18435	94021.7	79386.5	1.18435	94021.7	79386.5	1.18435	14635.2	13.8372
830.5341@12.976	3	3	7.69107	1.11857	15.5682	12.916	6.28616	6.28616	48585.1	7728.89	6.28616	48585.1	7728.89	6.28616	40856.2	15.3183
129.0421@3.9130006	3	3	1.1761	1.62733	16.3019	16.7598	-1.37351	1.37351	80791	110968	-1.37351	80791	110968	-1.37351	-30176.6	-14.8811
817.5683@13.8410015	3	3	0.972567	1.90179	16.5505	15.8091	1.67178	1.67178	95984.9	57414.9	1.67178	95984.9	57414.9	1.67178	38570	15.2352
297.157@5.2960005	3	3	2.39161	3.68964	15.2513	16.2369	-1.98021	1.98021	39002.9	77233.8	-1.98021	39002.9	77233.8	-1.98021	-38230.9	-15.2225
230.1049@4.285	3	3	1.44851	9.56628	12.7821	15.1106	-5.02275	5.02275	7043.67	35378.6	-5.02275	7043.67	35378.6	-5.02275	-28334.9	-14.7903
651.2217@1.1689999	3	3	5.02137	7.89848	15.0116	17.0724	-4.1723	4.1723	33032.7	137822	-4.1723	33032.7	137822	-4.1723	-104789	-16.6771
988.5917@14.418001	3	3	3.23823	1.8301	15.7611	16.8534	-2.13207	2.13207	55534.8	118404	-2.13207	55534.8	118404	-2.13207	-62869.2	-15.9401
199.0835@4.4140005	3	3	3.74985	1.62712	16.054	15.0441	2.01383	2.01383	68036.1	33784.4	2.01383	68036.1	33784.4	2.01383	34251.6	15.0639
532.3198@4.3919997	3	3	1.85885	1.76172	16.6091	15.4514	2.23107	2.23107	99964.8	44805.8	2.23107	99964.8	44805.8	2.23107	55159	15.7513
388.1939@3.876	3	3	3.09079	2.24297	16.1778	15.1653	2.01751	2.01751	74133.4	36745	2.01751	74133.4	36745	2.01751	37388.3	15.1903
399.1898@3.362	3	3	4.0793	3.06973	13.9196	12.1363	3.44202	3.44202	15495.5	4501.85	3.44202	15495.5	4501.85	3.44202	10993.6	13.4244
303.1787@3.3699994	3	3	1.84586	1.37092	15.4008	14.5141	1.84895	1.84895	43260.7	23397.4	1.84895	43260.7	23397.4	1.84895	19863.3	14.2778
679.4847@15.041998	3	3	1.9046	0.86724	15.9455	16.3828	-1.35404	1.35404	63107.4	85450.1	-1.35404	63107.4	85450.1	-1.35404	-22342.8	-14.4475
404.2912@12.936998	3	3	2.06578	1.74042	16.8118	15.9239	1.8505	1.8505	115042	62168.2	1.8505	115042	62168.2	1.8505	52874	15.6903
439.4123@15.095999	3	3	8.54924	5.73663	15.6874	13.9136	3.41945	3.41945	52768.1	15431.8	3.41945	52768.1	15431.8	3.41945	37336.4	15.1883
243.0845@1.6099999	3	3	3.55748	1.48463	15.7083	14.8375	1.82863	1.82863	53539.4	29278.4	1.82863	53539.4	29278.4	1.82863	24261	14.5664
580.2603@8.098	3	3	1.16359	3.7888	15.2311	17.4423	-4.63061	4.63061	38461.5	178100	-4.63061	38461.5	178100	-4.63061	-139639	-17.0913
317.2308@3.499	3	3	4.64341	3.93946	15.5502	14.1459	2.64688	2.64688	47981.1	18127.4	2.64688	47981.1	18127.4	2.64688	29853.7	14.8656
772.4359@15.567999	3	3		86.7019	10.2202	0	1192.88	1192.88	1192.88	1	1192.88	1192.88	1	1192.88	1191.88	10.219
806.5125@7.2200003	3	3	1.85951	0.211559	16.8019	16.3547	1.36343	1.36343	114258	83801.8	1.36343	114258	83801.8	1.36343	30455.8	14.8944
304.2031@11.496001	3	3	1.91947	9.93382	14.2725	16.0507	-3.42995	3.42995	19790.8	67881.3	-3.42995	19790.8	67881.3	-3.42995	-48090.5	-15.5535
774.526@7.343	3	3	1.62882	1.64605	16.4378	15.975	1.37822	1.37822	88772.2	64410.7	1.37822	88772.2	64410.7	1.37822	24361.5	14.5723
574.3855@8.121001	3	3	3.55878	1.95068	17.3347	16.2728	2.08774	2.08774	165297	79175.3	2.08774	165297	79175.3	2.08774	86122	16.3941
101.0849@3.5180001	3	3	0.887256	1.79529	15.5702	15.0508	1.43337	1.43337	48651.5	33942	1.43337	48651.5	33942	1.43337	14709.5	13.8445
280.1741@4.0100007	3	3	3.83491	4.06029	17.118	16.0359	2.11722	2.11722	142247	67185.9	2.11722	142247	67185.9	2.11722	75061.2	16.1958
374.2399@4.0380006	3	3	4.55267	1.24814	14.0704	12.9834	2.12433	2.12433	17203.9	8098.51	2.12433	17203.9	8098.51	2.12433	9105.37	13.1525
551.2998@4.7239995	3	3	0.0904661	7.22257	15.0613	17.0542	-3.98038	3.98038	34189.4	136087	-3.98038	34189.4	136087	-3.98038	-101897	-16.6368
248.0524@3.65	3	3	1.31118	2.97983	16.0846	16.7159	-1.54886	1.54886	69496.2	107640	-1.54886	69496.2	107640	-1.54886	-38143.9	-15.2192
690.468@7.87	3	3	2.48795	1.48076	16.6296	15.9779	1.57098	1.57098	101393	64541.5	1.57098	101393	64541.5	1.57098	36851.6	15.1694
183.1@3.626	3	3	0.390736	1.47282	16.1531	16.4809	-1.25512	1.25512	72872.1	91462.8	-1.25512	72872.1	91462.8	-1.25512	-18590.8	-14.1823
526.1496@1.165	3	3	3.79972	1.62704	16.0843	14.8144	2.41154	2.41154	69481.1	28812	2.41154	69481.1	28812	2.41154	40669.2	15.3116
143.0579@3.135	3	3	1.04964	2.17372	16.3	15.3449	1.93864	1.93864	80681.6	41617.6	1.93864	80681.6	41617.6	1.93864	39064	15.2536
129.0572@5.563	3	3	1.4759	1.55617	16.4947	16.0425	1.36809	1.36809	92342.4	67497.5	1.36808	92342.4	67497.5	1.36808	24844.8	14.6007
318.0855@6.2109995	3	3	0.485368	0.891522	16.3724	15.923	1.36546	1.36546	84833.9	62128.3	1.36546	84833.9	62128.3	1.36546	22705.6	14.4708
527.1159@1.1350001	3	3	1.88066	4.03112	15.3834	16.5392	-2.22805	2.22805	42743.9	95235.5	-2.22805	42743.9	95235.5	-2.22805	-52491.6	-15.6798
413.2058@3.2079997	3	3	9.47151	8.39929	14.8521	11.8634	7.93741	7.93741	29574.7	3725.99	7.93741	29574.7	3725.99	7.93741	25848.7	14.6578
728.5406@9.350999	3	3	1.0923	1.21544	16.5897	16.1525	1.35398	1.35398	98628.2	72843.4	1.35398	98628.2	72843.4	1.35398	25784.8	14.6542
228.1098@4.015	3	3	0.764011	3.33373	15.8506	16.5062	-1.57531	1.57531	59088.3	93082.5	-1.57531	59088.3	93082.5	-1.57531	-33994.1	-15.053
368.2548@5.1790004	3	3	2.28245	1.51811	16.1129	15.5948	1.43214	1.43214	70872	49486.8	1.43214	70872	49486.8	1.43214	21385.2	14.3843
522.3689@11.994001	3	3	1.24979	1.4104	17.3425	16.9132	1.34657	1.34657	166189	123416	1.34657	166189	123416	1.34657	42772.8	15.3844
442.3439@13.294001	3	3	0.864468	4.1191	15.6194	14.3004	2.49492	2.49492	50340.8	20177.3	2.49492	50340.8	20177.3	2.49492	30163.5	14.8805
755.5362@12.5	3	3	1.42994	1.13706	16.6856	16.1512	1.44837	1.44837	105405	72774.8	1.44837	105405	72774.8	1.44837	32629.7	14.9939
470.2011@5.354	3	3	2.77281	10.1829	14.3094	16.3529	-4.12259	4.12259	20302.6	83699.4	-4.12259	20302.6	83699.4	-4.12259	-63396.8	-15.9521
153.0786@3.501	3	3	1.5394	2.3679	14.9445	14.2322	1.63852	1.63852	31532.4	19244.4	1.63852	31532.4	19244.4	1.63852	12288	13.585
269.1727@3.9529996	3	3	1.46067	3.03472	15.4986	16.5812	-2.11788	2.11788	46296.6	98050.7	-2.11788	46296.6	98050.7	-2.11788	-51754	-15.6594
200.1158@3.609	3	3	0.496413	0.901154	17.0189	16.2261	1.7324	1.7324	132800	76656.8	1.7324	132800	76656.8	1.7324	56143.3	15.7768
184.0251@1.116	3	3	0.743724	4.2876	15.4605	16.6231	-2.23864	2.23864	45088.4	100937	-2.23864	45088.4	100937	-2.23864	-55848.3	-15.7692
246.0736@3.177	3	3	2.97726	0.636688	15.8806	16.5562	-1.59722	1.59722	60330.5	96360.9	-1.59722	60330.5	96360.9	-1.59722	-36030.4	-15.1369
208.1204@3.7719998	3	3	1.17595	3.0075	14.8333	16.4163	-2.99608	2.99608	29191.6	87460.4	-2.99608	29191.6	87460.4	-2.99608	-58268.8	-15.8304
272.1375@1.012	3	3	3.67466	1.47813	14.5713	13.8689	1.62722	1.62722	24344.6	14960.9	1.62722	24344.6	14960.9	1.62722	9383.73	13.1959
702.4652@11.443	3	3	173.205	8.75451	15.3151	3.92753	2679.17	2679.17	40766.5	15.2161	2679.17	40766.5	15.2161	2679.17	40751.3	15.3146
225.1467@3.771	3	3	1.74736	1.61026	15.0688	16.0434	-1.96514	1.96514	34367.5	67537.1	-1.96514	34367.5	67537.1	-1.96514	-33169.5	-15.0176
626.3714@3.987	3	3	1.72712	4.31214	15.9711	16.8305	-1.81424	1.81424	64237.9	116543	-1.81424	64237.9	116543	-1.81424	-52305.1	-15.6747
113.084@3.2900004	3	3	0.388955	1.56377	16.3442	16.6781	-1.26037	1.26037	83195.5	104857	-1.26037	83195.5	104857	-1.26037	-21661.3	-14.4028
527.294@3.7970004	3	3	1.3354	1.21905	15.8421	16.6931	-1.80382	1.80382	58740.6	105957	-1.80382	58740.6	105957	-1.80382	-47216.7	-15.527
430.3435@11.794	3	3	1.0764	2.42486	16.1286	15.3289	1.7408	1.7408	71646.5	41157.3	1.7408	71646.5	41157.3	1.7408	30489.2	14.896
353.1572@3.69	3	3	2.69578	3.47815	15.7549	14.4972	2.39119	2.39119	55297.5	23125.5	2.39119	55297.5	23125.5	2.39119	32171.9	14.9735
428.1892@4.042	3	3	0.596527	2.73458	15.6368	16.3483	-1.63754	1.63754	50950.8	83434.2	-1.63754	50950.8	83434.2	-1.63754	-32483.4	-14.9874
461.139@3.09	3	3	0.837894	1.48751	16.3231	15.6591	1.58452	1.58452	81986.7	51742.4	1.58452	81986.7	51742.4	1.58452	30244.3	14.8844
333.082@1.6000001	3	3	0.309521	3.20916	16.1818	14.1923	3.97114	3.97114	74339.1	18719.8	3.97114	74339.1	18719.8	3.97114	55619.2	15.7633
347.1689@3.2020001	3	3	6.63107	9.44323	13.6309	11.4907	4.40834	4.40834	12685.6	2877.65	4.40834	12685.6	2877.65	4.40834	9808	13.2597
1308.505@3.2260003	3	3	2.003	3.15547	15.8891	14.7852	2.14949	2.14949	60689	28234.2	2.14949	60689	28234.2	2.14949	32454.8	14.9861
248.1004@1.198	3	3	1.98482	1.07201	15.4616	15.9206	-1.37464	1.37464	45122.5	62027	-1.37464	45122.5	62027	-1.37464	-16904.5	-14.0451
503.294@3.8279996	3	3	7.74349	2.863	16.3986	14.9982	2.6398	2.6398	86391.1	32726.4	2.6398	86391.1	32726.4	2.6398	53664.7	15.7117
388.2313@3.426	3	3	2.90396	0.942786	15.8979	15.1697	1.65667	1.65667	61059.9	36857.1	1.65667	61059.9	36857.1	1.65667	24202.9	14.5629
336.1784@3.784	3	3	3.17305	9.20585	14.0464	15.5604	-2.85593	2.85593	16920.1	48322.5	-2.85593	16920.1	48322.5	-2.85593	-31402.4	-14.9386
213.0784@6.691001	3	3	0.81768	0.409623	15.9583	16.2497	-1.2238	1.2238	63668.8	77918.2	-1.2238	63668.8	77918.2	-1.2238	-14249.4	-13.7986
655.4019@6.79	3	3		17.9246	12.7301	0	6794.16	6794.16	6794.16	1	6794.16	6794.16	1	6794.16	6793.16	12.7299
312.2023@6.291	3	3	0.765346	1.53664	15.7682	14.952	1.7608	1.7608	55808.2	31694.9	1.7608	55808.2	31694.9	1.7608	24113.3	14.5575
430.1341@1.76	3	3	1.60471	1.40679	16.2465	15.7844	1.37755	1.37755	77748.6	56439.6	1.37755	77748.6	56439.6	1.37755	21308.9	14.3792
634.3158@3.3139997	3	3	1.82489	9.96443	14.8596	16.5791	-3.29324	3.29324	29729.8	97907.5	-3.29324	29729.8	97907.5	-3.29324	-68177.7	-16.057
352.1513@1.111	3	3	5.41487	6.44002	15.9542	14.171	3.44177	3.44177	63486	18445.8	3.44177	63486	18445.8	3.44177	45040.2	15.4589
1064.2952@1.156	3	3	1.5526	4.73433	15.4032	16.3727	-1.95818	1.95818	43333.8	84855.3	-1.95818	43333.8	84855.3	-1.95818	-41521.5	-15.3416
693.2291@4.1269994	3	3	2.32052	5.595	14.866	16.2913	-2.6858	2.6858	29861.1	80200.9	-2.6858	29861.1	80200.9	-2.6858	-50339.8	-15.6194
970.2864@1.713	3	3	1.90007	1.83385	16.9795	16.3411	1.55662	1.55662	129226	83016.8	1.55662	129226	83016.8	1.55662	46208.8	15.4959
418.2409@4.4199996	3	3	0.492896	3.10662	16.2022	15.2051	1.99603	1.99603	75396.5	37773.2	1.99603	75396.5	37773.2	1.99603	37623.3	15.1993
416.2251@4.2410007	3	3	2.11529	2.28697	15.8948	14.922	1.96271	1.96271	60927.5	31042.6	1.96271	60927.5	31042.6	1.96271	29884.9	14.8671
308.2342@12.934999	3	3	1.67001	2.62779	16.3762	15.5125	1.81973	1.81973	85062.6	46744.6	1.81973	85062.6	46744.6	1.81973	38318.1	15.2257
794.4914@16.058	3	3	3.44686	4.15419	17.0002	15.7564	2.3682	2.3682	131088	55353.6	2.3682	131088	55353.6	2.3682	75734.6	16.2087
386.2808@12.942999	3	3	0.668494	3.07246	15.7242	15.1066	1.53425	1.53425	54131.5	35282.1	1.53425	54131.5	35282.1	1.53425	18849.5	14.2022
876.4844@8.268999	3	3	2.05291	3.29498	15.4206	16.1249	-1.6294	1.6294	43858.8	71463.6	-1.6294	43858.8	71463.6	-1.6294	-27604.7	-14.7526
276.0989@6.724	3	3	1.88301	9.23532	14.7506	16.4757	-3.30591	3.30591	27566.7	91132.9	-3.30591	27566.7	91132.9	-3.30591	-63566.3	-15.956
344.2408@4.3779993	3	3	1.3201	1.33229	15.0556	14.6913	1.2873	1.2873	34055.9	26455.3	1.2873	34055.9	26455.3	1.2873	7600.63	12.8919
242.1622@1.5439999	3	3	0.759688	1.14075	15.8843	16.4211	-1.4507	1.4507	60486.4	87747.4	-1.4507	60486.4	87747.4	-1.4507	-27261	-14.7345
754.4618@13.253	3	3	3.47262	3.03639	16.1201	15.2272	1.85688	1.85688	71222.9	38356.2	1.85688	71222.9	38356.2	1.85688	32866.7	15.0043
682.3508@4.2179995	3	3	4.13806	1.4642	16.1007	15.3188	1.71929	1.71929	70271.7	40872.6	1.71929	70271.7	40872.6	1.71929	29399.2	14.8435
200.1153@5.2900004	3	3	2.3523	173.205	5.39015	16.0928	-1666.6	1666.6	41.937	69892.3	-1666.6	41.937	69892.3	-1666.6	-69850.4	-16.092
577.3791@9.908999	3	3	1.25854	3.26532	16.1146	16.7735	-1.57885	1.57885	70955.4	112028	-1.57885	70955.4	112028	-1.57885	-41072.6	-15.3259
836.5236@6.901	3	3	1.1905	0.47973	16.1666	16.4433	-1.21147	1.21147	73556.4	89111.4	-1.21147	73556.4	89111.4	-1.21147	-15555.1	-13.9251
299.1476@3.3419995	3	3	1.23592	7.17658	15.1285	16.5895	-2.75298	2.75298	35820.4	98612.8	-2.75298	35820.4	98612.8	-2.75298	-62792.3	-15.9383
432.3232@12.739999	3	3		5.18566	13.1249	0	8932.84	8932.84	8932.84	1	8932.84	8932.84	1	8932.84	8931.84	13.1247
374.1787@3.4120002	3	3	2.32025	4.64892	15.2824	14.3442	1.91615	1.91615	39853	20798.5	1.91615	39853	20798.5	1.91615	19054.6	14.2178
279.157@3.6419997	3	3	0.885839	0.51624	15.7327	16.087	-1.27841	1.27841	54450.8	69610.4	-1.27841	54450.8	69610.4	-1.27841	-15159.5	-13.8879
361.1516@3.7880006	3	3	3.22887	1.17117	16.278	15.1924	2.12224	2.12224	79464.4	37443.7	2.12224	79464.4	37443.7	2.12224	42020.7	15.3588
1044.6882@14.364	3	3	1.62425	1.62256	15.9925	16.5212	-1.44256	1.44256	65197.5	94051	-1.44256	65197.5	94051	-1.44256	-28853.6	-14.8165
304.2027@13.407	3	3	1.00781	7.98094	14.8103	16.3342	-2.87572	2.87572	28730.4	82620.6	-2.87572	28730.4	82620.6	-2.87572	-53890.2	-15.7177
790.2233@1.7060001	3	3	2.06709	1.63477	16.6734	15.9307	1.67326	1.67326	104517	62463.5	1.67326	104517	62463.5	1.67326	42053.9	15.36
718.3007@3.0839999	3	3	1.28503	3.96939	15.524	16.4888	-1.95178	1.95178	47119.2	91966.4	-1.95178	47119.2	91966.4	-1.95178	-44847.2	-15.4527
1164.7673@11.809999	3	3	1.36239	2.27954	16.8188	16.2362	1.49745	1.49745	115598	77196.6	1.49745	115598	77196.6	1.49745	38401.2	15.2289
457.1791@3.3930001	3	3	1.6941	0.671087	15.521	14.8389	1.60452	1.60452	47021.8	29305.9	1.60452	47021.8	29305.9	1.60452	17715.9	14.1128
414.3111@12.941999	3	3	2.9745	1.92613	17.1482	16.3465	1.74315	1.74315	145255	83329.2	1.74315	145255	83329.2	1.74315	61926.1	15.9183
302.2454@10.834	3	3	1.36638	1.48278	15.6322	15.2563	1.29764	1.29764	50786.8	39137.8	1.29764	50786.8	39137.8	1.29764	11649.1	13.5079
548.2414@3.271	3	3	3.0782	3.94682	16.0296	14.5445	2.79944	2.79944	66894.5	23895.6	2.79944	66894.5	23895.6	2.79944	42998.9	15.392
790.5404@16.423002	3	3	2.20316	7.47157	15.2993	16.6461	-2.5435	2.5435	40322.6	102560	-2.5435	40322.6	102560	-2.5435	-62237.8	-15.9255
390.169@1.1940001	3	3	1.44363	1.73097	15.1841	13.6157	2.9657	2.9657	37227	12552.5	2.9657	37227	12552.5	2.9657	24674.4	14.5907
410.3173@12.135001	3	3	11.2724	1.0031	19.7249	12.9084	112.709	112.709	866518	7688.08	112.709	866518	7688.08	112.709	858830	19.712
234.0993@3.968	3	3	0.166033	2.37944	15.6591	16.1629	-1.41799	1.41799	51742.2	73369.6	-1.41799	51742.2	73369.6	-1.41799	-21627.5	-14.4006
774.5835@12.948	3	3	7.67776	4.70546	15.9607	14.3859	2.97898	2.97898	63773.8	21407.9	2.97898	63773.8	21407.9	2.97898	42365.9	15.3706
144.0101@1.0130001	3	3	0.70429	1.82273	16.0135	16.4787	-1.38048	1.38048	66153.4	91323.6	-1.38048	66153.4	91323.6	-1.38048	-25170.2	-14.6194
688.2031@1.5839999	3	3	1.62446	1.77063	16.0432	15.4098	1.55113	1.55113	67526.6	43533.8	1.55113	67526.6	43533.8	1.55113	23992.9	14.5503
190.0585@3.5759997	3	3	0.502329	2.03949	15.7209	16.1281	-1.3261	1.3261	54009.5	71622	-1.3261	54009.5	71622	-1.3261	-17612.5	-14.1043
244.109@5.2929997	3	3	4.00396	3.71025	14.7855	15.9392	-2.22483	2.22483	28241.9	62833.4	-2.22483	28241.9	62833.4	-2.22483	-34591.5	-15.0781
478.2771@5.278	3	3	9.58435	5.23638	13.9294	11.873	4.15953	4.15953	15601.9	3750.88	4.15953	15601.9	3750.88	4.15953	11851	13.5327
894.4726@12.675001	3	3	1.09108	8.50988	14.7442	16.2541	-2.84784	2.84784	27443.6	78155	-2.84784	27443.6	78155	-2.84784	-50711.4	-15.63
308.1335@5.3009996	3	3	1.56272	9.84945	14.567	16.2834	-3.28605	3.28605	24272.6	79761	-3.28605	24272.6	79761	-3.28605	-55488.4	-15.7599
171.0523@4.6910005	3	3	1.17688	2.87111	14.8794	14.0921	1.72581	1.72581	30140.1	17464.4	1.72581	30140.1	17464.4	1.72581	12675.8	13.6298
512.1142@1.191	3	3	1.23002	2.27537	14.7711	14.3314	1.35633	1.35633	27960.7	20615	1.35633	27960.7	20615	1.35633	7345.72	12.8427
848.4001@7.711999	3	3	2.51874	0.571558	16.7689	16.1984	1.48504	1.48504	111668	75195.8	1.48504	111668	75195.8	1.48504	36472.6	15.1545
377.1067@1.608	3	3	1.63075	0.98846	15.8377	16.3818	-1.45807	1.45807	58564.3	85390.6	-1.45807	58564.3	85390.6	-1.45807	-26826.3	-14.7114
223.9792@1.097	3	3	1.24373	2.38996	15.736	16.2934	-1.47163	1.47163	54577.3	80317.4	-1.47163	54577.3	80317.4	-1.47163	-25740.1	-14.6517
354.1895@3.362	3	3	1.64685	1.7493	14.794	15.9118	-2.17019	2.17019	28407.4	61649.3	-2.17019	28407.4	61649.3	-2.17019	-33241.9	-15.0207
227.0936@3.829	3	3	3.60925	5.26987	14.5419	15.7546	-2.31779	2.31779	23852.6	55285.3	-2.31779	23852.6	55285.3	-2.31779	-31432.7	-14.94
209.104@4.0159993	3	3	0.429807	3.38691	15.8101	16.4709	-1.58094	1.58094	57454.1	90831.4	-1.58094	57454.1	90831.4	-1.58094	-33377.3	-15.0266
289.0941@6.299	3	3	0.664005	0.803354	15.8359	16.1396	-1.23431	1.23431	58488	72192.6	-1.23431	58488	72192.6	-1.23431	-13704.6	-13.7424
1110.7942@15.988001	3	3	1.88572	0.977213	16.8706	16.3893	1.39599	1.39599	119830	85839	1.39599	119830	85839	1.39599	33991.4	15.0529
386.2653@6.927001	3	3	3.7891	2.34069	16.2806	15.5005	1.71724	1.71724	79608	46358.2	1.71724	79608	46358.2	1.71724	33249.8	15.0211
818.3756@1.6380002	3	3	1.95037	3.01614	16.6432	15.9755	1.58862	1.58862	102357	64431.3	1.58862	102357	64431.3	1.58862	37925.5	15.2109
641.4271@5.9980006	3	3	173.205	14.7003	14.5955	4.11273	1430.94	1430.94	24755.7	17.3003	1430.94	24755.7	17.3003	1430.94	24738.4	14.5945
328.1732@3.8229995	3	3	0.930527	1.75702	15.5457	15.9196	-1.29586	1.29586	47831.3	61982.6	-1.29586	47831.3	61982.6	-1.29586	-14151.3	-13.7887
312.1919@4.4329996	3	3	3.92904	0.0852208	15.5776	14.9109	1.58743	1.58743	48902.9	30806.3	1.58743	48902.9	30806.3	1.58743	18096.7	14.1434
327.1315@3.3779998	3	3	1.25884	3.11853	15.707	16.4584	-1.68341	1.68341	53491.9	90048.7	-1.68341	53491.9	90048.7	-1.68341	-36556.8	-15.1579
226.1309@4.404	3	3	3.19455	1.54952	15.2986	14.6805	1.53489	1.53489	40302.8	26257.8	1.53489	40302.8	26257.8	1.53489	14045	13.7778
186.1401@12.945	3	3	3.10184	3.09989	14.69	13.7736	1.88742	1.88742	26432.2	14004.3	1.88742	26432.2	14004.3	1.88742	12427.8	13.6013
750.5047@12.601999	3	3	7.03059	11.5406	14.9409	11.361	11.9582	11.9582	31452.9	2630.24	11.9582	31452.9	2630.24	11.9582	28822.6	14.8149
692.4636@9.342001	3	3	0.449678	0.635106	15.9056	15.5949	1.24036	1.24036	61386.5	49490.7	1.24036	61386.5	49490.7	1.24036	11895.7	13.5382
332.2343@6.924	3	3	3.09218	0.953236	15.9827	15.2774	1.63052	1.63052	64755.3	39714.5	1.63052	64755.3	39714.5	1.63052	25040.9	14.612
426.2141@6.1819997	3	3	3.45821	1.48564	16.3915	15.0859	2.4719	2.4719	85968.9	34778.5	2.4719	85968.9	34778.5	2.4719	51190.4	15.6436
273.0744@3.3379998	3	3	3.1067	1.21149	15.9832	14.8486	2.19547	2.19547	64775.2	29504	2.19547	64775.2	29504	2.19547	35271.2	15.1062
216.0783@5.021	3	3	1.12771	10.1829	14.0323	15.66	-3.09026	3.09026	16755	51777.3	-3.09026	16755	51777.3	-3.09026	-35022.3	-15.096
312.2443@12.014	3	3	0.332618	1.18814	16.2245	15.7386	1.40054	1.40054	76572.6	54673.7	1.40054	76572.6	54673.7	1.40054	21898.9	14.4186
414.2454@4.3069997	3	3	1.68668	3.56669	15.4144	16.3521	-1.91536	1.91536	43672.7	83649	-1.91536	43672.7	83649	-1.91536	-39976.3	-15.2869
1159.742@14.178999	3	3	2.22315	1.29712	16.083	16.581	-1.41227	1.41227	69415.2	98033.2	-1.41227	69415.2	98033.2	-1.41227	-28618	-14.8046
720.1772@7.044999	3	3	173.205	10.9957	15.5247	4.36149	2293.26	2293.26	47140.3	20.5561	2293.26	47140.3	20.5561	2293.26	47119.8	15.524
769.385@6.686	3	3	2.96405	1.321	15.617	16.7513	-2.19507	2.19507	50256.3	110316	-2.19507	50256.3	110316	-2.19507	-60059.8	-15.8741
282.1463@9.346	3	3	2.31057	1.10452	16.2156	15.678	1.45159	1.45159	76099.2	52424.8	1.45159	76099.2	52424.8	1.45159	23674.4	14.531
158.1412@5.64	3	3	1.26859	173.205	4.45925	13.2408	-440.052	440.052	21.9972	9679.93	-440.052	21.9972	9679.93	-440.052	-9657.93	-13.2375
1064.7242@12.526	3	3	3.67704	3.32032	17.5639	16.2222	2.53439	2.53439	193756	76450.7	2.53439	193756	76450.7	2.53439	117305	16.8399
796.5659@14.897001	3	3	5.62113	3.73352	15.5824	14.2325	2.54893	2.54893	49064.8	19249.2	2.54893	49064.8	19249.2	2.54893	29815.6	14.8638
426.1309@3.4850001	3	3	1.27126	1.89385	15.5972	16.0509	-1.36956	1.36956	49569.8	67888.7	-1.36956	49569.8	67888.7	-1.36956	-18318.9	-14.161
442.307@7.329	3	3	2.05407	1.38454	16.3979	15.8767	1.43509	1.43509	86348.3	60169.3	1.43509	86348.3	60169.3	1.43509	26179	14.6761
534.3911@11.326001	3	3	0.207714	1.30181	16.253	15.8665	1.3072	1.3072	78098.3	59744.9	1.3072	78098.3	59744.9	1.3072	18353.4	14.1638
210.0787@7.3340006	3	3	1.03225	2.1214	15.8785	16.3227	-1.36059	1.36059	60243.1	81966.4	-1.36059	60243.1	81966.4	-1.36059	-21723.3	-14.407
539.0082@16.091997	3	3	3.51333	1.89033	16.6063	14.4287	4.52387	4.52387	99769	22053.9	4.52387	99769	22053.9	4.52387	77715.1	16.2459
334.2903@7.044999	3	3	4.07877	9.54722	13.7162	15.8403	-4.35934	4.35934	13458	58667.7	-4.35934	13458	58667.7	-4.35934	-45209.8	-15.4643
374.135@5.911	3	3	5.1516	1.04565	14.2876	12.726	2.95192	2.95192	19998.8	6774.86	2.95192	19998.8	6774.86	2.95192	13224	13.6909
143.0579@1.615	3	3	1.56583	2.28869	15.7817	14.6635	2.17074	2.17074	56333.8	25951.5	2.17074	56333.8	25951.5	2.17074	30382.3	14.8909
457.8488@1.024	3	3	1.49573	5.94982	15.1375	16.1989	-2.08691	2.08691	36044.3	75221.2	-2.08691	36044.3	75221.2	-2.08691	-39177	-15.2577
244.1199@4.9749994	3	3	0.8906	2.18695	15.4156	15.8666	-1.367	1.367	43708.5	59749.4	-1.367	43708.5	59749.4	-1.367	-16040.9	-13.9695
182.1173@3.7050004	3	3	2.52953	1.92021	14.0971	14.7421	-1.56371	1.56371	17525.2	27404.4	-1.56371	17525.2	27404.4	-1.56371	-9879.19	-13.2702
137.0379@3.6939998	3	3	1.4857	8.49116	14.2868	15.6839	-2.6338	2.6338	19986.8	52641.3	-2.6338	19986.8	52641.3	-2.6338	-32654.4	-14.995
251.0076@1.1070001	3	3	5.0779	4.81993	15.9574	13.6046	5.10815	5.10815	63627.1	12456	5.10815	63627.1	12456	5.10815	51171.1	15.643
950.5559@14.879	3	3		88.2082	6.48441	0	89.5367	89.5367	89.5367	1	89.5367	89.5367	1	89.5367	88.5367	6.4682
246.1213@1.708	3	3	1.54141	0.603877	15.4643	15.0996	1.28757	1.28757	45207.9	35110.9	1.28757	45207.9	35110.9	1.28757	10097	13.3016
499.2216@1.2139999	3	3	0.267283	0.304365	16.2001	16.6251	-1.34249	1.34249	75288.5	101074	-1.34249	75288.5	101074	-1.34249	-25785.4	-14.6543
300.1431@1.1940001	3	3	1.92784	2.08967	15.477	16.149	-1.59328	1.59328	45608.5	72667.3	-1.59328	45608.5	72667.3	-1.59328	-27058.8	-14.7238
389.2261@3.317	3	3	4.72245	5.22811	14.4428	13.2545	2.27889	2.27889	22270.1	9772.34	2.27889	22270.1	9772.34	2.27889	12497.7	13.6094
176.0468@6.2960005	3	3	0.361361	0.237205	15.6545	16.0498	-1.31528	1.31528	51578	67839.4	-1.31528	51578	67839.4	-1.31528	-16261.4	-13.9892
488.1909@5.5719995	3	3	2.16358	9.19848	13.8773	15.7579	-3.68217	3.68217	15048.4	55410.8	-3.68217	15048.4	55410.8	-3.68217	-40362.3	-15.3007
694.426@12.970999	3	3	5.49461	4.46064	15.3501	13.9461	2.64621	2.64621	41766.9	15783.7	2.64621	41766.9	15783.7	2.64621	25983.2	14.6653
498.3152@4.0229993	3	3	1.99576	2.74957	16.2956	15.567	1.65696	1.65696	80437.1	48545.1	1.65696	80437.1	48545.1	1.65696	31892	14.9609
502.1465@1.7299998	3	3	6.72691	1.16767	16.2519	14.9807	2.41351	2.41351	78036.1	32333	2.41351	78036.1	32333	2.41351	45703.1	15.48
387.1211@7.575	3	3	1.64534	1.75696	16.096	15.2569	1.78886	1.78886	70043.9	39155.7	1.78886	70043.9	39155.7	1.78886	30888.2	14.9148
307.1889@3.65	3	3	0.453737	0.585384	16.2858	16.0119	1.20908	1.20908	79892.2	66076.9	1.20908	79892.2	66076.9	1.20908	13815.3	13.754
459.2676@4.119	3	3	2.12141	1.6373	15.9221	15.1999	1.64969	1.64969	62090.2	37637.6	1.64969	62090.2	37637.6	1.64969	24452.6	14.5777
204.0762@4.2729993	3	3	1.44903	1.03576	15.2588	15.8723	-1.52995	1.52995	39207.2	59985.1	-1.52995	39207.2	59985.1	-1.52995	-20777.9	-14.3428
224.1771@11.323999	3	3	173.205	3.49098	15.0824	5.02044	1068.92	1068.92	34693.7	32.4567	1068.92	34693.7	32.4567	1068.92	34661.2	15.081
418.2464@7.6120005	3	3		86.9416	9.62562	0	789.954	789.954	789.954	1	789.954	789.954	1	789.954	788.954	9.6238
175.0623@5.0400004	3	3	0.570165	0.966775	15.9241	15.5053	1.33678	1.33678	62177.5	46512.9	1.33678	62177.5	46512.9	1.33678	15664.6	13.9352
1072.6034@7.941001	3	3	2.54848	2.17496	16.0888	16.7856	-1.62092	1.62092	69694.4	112969	-1.62092	69694.4	112969	-1.62092	-43274.5	-15.4012
528.4161@13.4660015	3	3	2.87363	0.978799	16.0498	15.2481	1.74312	1.74312	67835.8	38916.2	1.74312	67835.8	38916.2	1.74312	28919.5	14.8198
210.1357@3.652	3	3	0.309726	1.22114	15.7038	15.9973	-1.22559	1.22559	53372.5	65413	-1.22559	53372.5	65413	-1.22559	-12040.5	-13.5556
349.197@1.184	3	3	4.03059	1.55446	15.7528	14.6445	2.1559	2.1559	55216.1	25611.6	2.1559	55216.1	25611.6	2.1559	29604.5	14.8535
454.1791@3.1469998	3	3	1.97793	1.74914	15.8842	14.5565	2.51014	2.51014	60482.6	24095.3	2.51014	60482.6	24095.3	2.51014	36387.3	15.1511
534.3185@11.311999	3	3	1.23335	2.52313	15.9943	15.0929	1.8678	1.8678	65277.1	34948.6	1.8678	65277.1	34948.6	1.8678	30328.4	14.8884
210.0995@4.0120006	3	3	1.41377	2.29922	15.2273	15.7614	-1.44795	1.44795	38360.7	55544.3	-1.44795	38360.7	55544.3	-1.44795	-17183.7	-14.0687
398.2143@4.7519994	3	3	11.5349	8.24577	14.791	12.4611	5.02787	5.02787	28349.7	5638.51	5.02787	28349.7	5638.51	5.02787	22711.2	14.4711
532.4115@14.893999	3	3	1.89518	0.415261	16.6412	15.2705	2.58586	2.58586	102209	39526.2	2.58586	102209	39526.2	2.58586	62683.1	15.9358
384.2404@3.933	3	3	2.76104	0.528635	16.6731	15.9394	1.66281	1.66281	104494	62841.8	1.66281	104494	62841.8	1.66281	41652.1	15.3461
844.4707@10.761001	3	3	1.82275	2.4579	15.4693	14.2768	2.28536	2.28536	45363.9	19849.8	2.28536	45363.9	19849.8	2.28536	25514.1	14.639
408.2036@6.077	3	3	4.2206	1.29982	14.6475	12.9855	3.16463	3.16463	25664.9	8109.93	3.16463	25664.9	8109.93	3.16463	17555	14.0996
773.5744@4.902	3	3	0.645039	0.394959	16.2337	16.4431	-1.15626	1.15626	77059.5	89100.5	-1.15626	77059.5	89100.5	-1.15626	-12041	-13.5557
272.1766@6.2659993	3	3	1.88111	0.827556	14.8011	15.9712	-2.25013	2.25013	28548.9	64238.8	-2.25013	28548.9	64238.8	-2.25013	-35689.9	-15.1232
332.1931@3.2379994	3	3		3.79945	13.4332	0	11060.7	11060.7	11060.7	1	11060.7	11060.7	1	11060.7	11059.7	13.433
389.1785@4.0250006	3	3	2.23577	2.48199	13.6899	14.5071	-1.762	1.762	13214.8	23284.5	-1.762	13214.8	23284.5	-1.762	-10069.6	-13.2977
1258.2546@3.1779997	3	3	0.992904	0.555124	15.9999	16.3022	-1.2331	1.2331	65532	80807.8	-1.2331	65532	80807.8	-1.2331	-15275.8	-13.899
317.1729@4.395	3	3	1.15081	3.60876	14.5714	15.8109	-2.36121	2.36121	24345.7	57485.3	-2.36121	24345.7	57485.3	-2.36121	-33139.6	-15.0163
184.1204@4.1510005	3	3	2.05318	2.28494	15.3731	14.8119	1.47549	1.47549	42438.3	28762.3	1.47549	42438.3	28762.3	1.47549	13676	13.7394
408.2464@4.6710005	3	3	3.12381	10.6294	13.7829	15.7541	-3.92076	3.92076	14095.3	55264.4	-3.92076	14095.3	55264.4	-3.92076	-41169.1	-15.3293
243.1218@1.7089999	3	3	1.08999	2.68398	15.136	16.065	-1.90397	1.90397	36007.7	68557.6	-1.90397	36007.7	68557.6	-1.90397	-32549.9	-14.9904
436.2306@3.6729999	3	3	0.755918	1.34519	15.9368	16.3116	-1.29663	1.29663	62728.4	81335.6	-1.29663	62728.4	81335.6	-1.29663	-18607.2	-14.1836
658.4053@7.807	3	3	2.08905	2.09916	15.2554	15.8541	-1.51438	1.51438	39113.1	59232.2	-1.51438	39113.1	59232.2	-1.51438	-20119.1	-14.2963
935.5589@10.161001	3	3	2.70576	24	12.5225	16.1696	-12.5286	12.5286	5883.63	73713.7	-12.5286	5883.63	73713.7	-12.5286	-67830.1	-16.0496
322.177@6.1269994	3	3	3.31239	0.973162	14.9036	14.3309	1.4873	1.4873	30649.6	20607.6	1.4873	30649.6	20607.6	1.4873	10042	13.2938
812.5583@7.4049997	3	3	0.861165	0.619376	17.0869	16.7934	1.22561	1.22561	139207	113582	1.22561	139207	113582	1.22561	25625.1	14.6453
278.1145@6.0750003	3	3	2.11451	1.58383	17.1712	17.7869	-1.53232	1.53232	147589	226152	-1.53232	147589	226152	-1.53232	-78563.7	-16.2616
588.3985@8.423001	3	3	2.8892	3.28462	16.2452	15.2752	1.95889	1.95889	77676.6	39653.4	1.95889	77676.6	39653.4	1.95889	38023.2	15.2146
273.8655@1.073	3	3	0.297875	0.208732	16.0593	15.8752	1.1361	1.1361	68287.3	60106.8	1.1361	68287.3	60106.8	1.1361	8180.56	12.998
641.4709@12.338999	3	3	0.31257	0.541845	16.2203	16.4224	-1.15037	1.15037	76345.9	87826.1	-1.15037	76345.9	87826.1	-1.15037	-11480.2	-13.4869
546.336@3.959	3	3	7.23861	0.303412	17.2418	15.8913	2.55003	2.55003	154985	60777.7	2.55003	154985	60777.7	2.55003	94207.2	16.5236
136.038@3.868	3	3	3.00353	1.56607	15.1404	15.8802	-1.66993	1.66993	36117.7	60314.2	-1.66993	36117.7	60314.2	-1.66993	-24196.5	-14.5625
276.0955@1.6130002	3	3	2.16799	2.59349	14.8071	15.7675	-1.94582	1.94582	28666.6	55779.9	-1.94582	28666.6	55779.9	-1.94582	-27113.3	-14.7267
327.8908@1.0270001	3	3	1.24547	4.3443	15.2142	15.992	-1.71452	1.71452	38012.4	65172.9	-1.71452	38012.4	65172.9	-1.71452	-27160.5	-14.7292
238.1306@5.632	3	3	0.23661	4.41721	14.0715	14.9113	-1.78981	1.78981	17216.1	30813.5	-1.78981	17216.1	30813.5	-1.78981	-13597.5	-13.7311
143.0945@1.7250001	3	3	1.42194	1.99721	15.7808	15.0023	1.71531	1.71531	56297.1	32820.4	1.71531	56297.1	32820.4	1.71531	23476.7	14.5189
486.3181@7.9450006	3	3	3.72283	1.31354	15.9938	14.9799	2.01932	2.01932	65255.5	32315.6	2.01932	65255.5	32315.6	2.01932	32939.9	15.0076
124.0632@3.968	3	3	0.490729	3.00433	15.4958	16.141	-1.56398	1.56398	46205.3	72264.3	-1.56398	46205.3	72264.3	-1.56398	-26058.9	-14.6695
377.3135@6.986	3	3	4.99648	173.205	5.04257	15.404	-1315.57	1315.57	32.9583	43359.1	-1315.57	32.9583	43359.1	-1315.57	-43326.2	-15.403
425.2265@3.31	3	3	2.39561	1.77415	14.793	15.7384	-1.92576	1.92576	28388	54668.5	-1.92576	28388	54668.5	-1.92576	-26280.6	-14.6817
428.1106@1.7089999	3	3	4.30672	1.48743	15.5219	14.7437	1.71507	1.71507	47050.4	27433.6	1.71507	47050.4	27433.6	1.71507	19616.8	14.2598
204.0524@4.6020007	3	3	0.908835	2.81668	15.1954	15.8619	-1.58718	1.58718	37521.5	59553.4	-1.58718	37521.5	59553.4	-1.58718	-22031.9	-14.4273
472.3182@9.324999	3	3	2.00179	5.18612	15.2519	16.3466	-2.13564	2.13564	39019.1	83330.6	-2.13564	39019.1	83330.6	-2.13564	-44311.6	-15.4354
771.528@6.4639997	3	3	4.45589	7.64508	15.3033	13.6912	3.05692	3.05692	40434.1	13227.1	3.05692	40434.1	13227.1	3.05692	27207	14.7317
323.1358@4.5509996	3	3	3.4465	1.85303	14.0969	15.1256	-2.04023	2.04023	17522	35748.9	-2.04023	17522	35748.9	-2.04023	-18226.9	-14.1538
600.3977@4.598	3	3	1.20056	173.205	5.54716	16.9058	-2625.9	2625.9	46.7587	122784	-2625.9	46.7587	122784	-2625.9	-122737	-16.9052
796.6516@13.087999	3	3		90.6919	8.2551	0	305.515	305.515	305.515	1	305.515	305.515	1	305.515	304.515	8.25037
318.1065@6.008	3	3	1.71882	6.62733	14.141	15.27	-2.18698	2.18698	18066.6	39511.4	-2.18698	18066.6	39511.4	-2.18698	-21444.8	-14.3883
573.7184@3.428	3	3	1.42739	1.03696	15.4422	16.3831	-1.91979	1.91979	44519.7	85468.7	-1.91979	44519.7	85468.7	-1.91979	-40949	-15.3215
849.2966@4.0390005	3	3	16.2666	8.98774	15.222	12.4255	6.94748	6.94748	38218.5	5501.05	6.94748	38218.5	5501.05	6.94748	32717.4	14.9978
808.5514@11.998	3	3	0.0979932	0.756862	19.9307	19.6921	1.17984	1.17984	999425	847083	1.17984	999425	847083	1.17984	152341	17.217
546.4269@13.464998	3	3	1.45025	3.21558	16.1049	15.2044	1.86678	1.86678	70480	37754.8	1.86678	70480	37754.8	1.86678	32725.3	14.9981
690.3432@9.504999	3	3	0.971023	4.82415	14.9474	16.3481	-2.64045	2.64045	31594	83422.4	-2.64045	31594	83422.4	-2.64045	-51828.4	-15.6615
806.5352@14.900999	3	3		86.6192	8.92959	0	487.613	487.613	487.613	1	487.613	487.613	1	487.613	486.613	8.92663
753.5362@7.871	3	3	2.11771	1.6498	16.4228	15.8172	1.52165	1.52165	87852.3	57734.8	1.52165	87852.3	57734.8	1.52165	30117.5	14.8783
980.6038@14.018	3	3	1.13318	3.73746	15.8743	15.1731	1.62584	1.62584	60066.7	36945.1	1.62584	60066.7	36945.1	1.62584	23121.6	14.497
318.2186@12.939001	3	3	1.61768	3.0831	16.0382	15.3907	1.56645	1.56645	67292.3	42958.5	1.56645	67292.3	42958.5	1.56645	24333.8	14.5707
473.3701@13.334	3	3	6.51654	3.1955	16.2714	14.841	2.69535	2.69535	79102	29347.6	2.69535	79102	29347.6	2.69535	49754.4	15.6025
475.2257@4.7070003	3	3	0.412924	5.72585	15.0703	16.4704	-2.63915	2.63915	34404.5	90798.5	-2.63915	34404.5	90798.5	-2.63915	-56394	-15.7833
255.0742@1.615	3	3	1.89621	1.08967	14.9667	14.4963	1.38546	1.38546	32019.5	23111.1	1.38546	32019.5	23111.1	1.38546	8908.36	13.1209
170.1046@3.9900002	3	3	0.174707	1.36073	14.9682	15.6635	-1.61913	1.61913	32054.6	51900.5	-1.61913	32054.6	51900.5	-1.61913	-19845.9	-14.2766
445.144@1.2159998	3	3	1.94848	4.97098	14.468	15.5978	-2.18827	2.18827	22662.5	49591.7	-2.18827	22662.5	49591.7	-2.18827	-26929.2	-14.7169
317.1081@1.2019999	3	3	3.47361	5.40664	15.635	13.857	3.42966	3.42966	50887.8	14837.6	3.42966	50887.8	14837.6	3.42966	36050.3	15.1377
449.3703@14.294001	3	3	0.715576	0.637842	16.183	16.4025	-1.1643	1.1643	74401.6	86625.9	-1.1643	74401.6	86625.9	-1.1643	-12224.3	-13.5775
220.179@1.118	3	3	173.205	1.9066	13.8589	4.54164	637.946	637.946	14857.8	23.29	637.947	14857.8	23.29	637.947	14834.5	13.8567
134.0361@5.2999997	3	3	1.61561	5.62095	14.4834	15.6484	-2.24236	2.24236	22905.8	51362.9	-2.24236	22905.8	51362.9	-2.24236	-28457.2	-14.7965
254.1224@3.9439998	3	3	3.72442	3.46541	16.4301	15.2433	2.27653	2.27653	88300.4	38787.2	2.27653	88300.4	38787.2	2.27653	49513.2	15.5955
179.0571@5.097	3	3	1.84681	1.8902	15.5238	14.954	1.48438	1.48438	47112.4	31738.7	1.48438	47112.4	31738.7	1.48438	15373.7	13.9082
302.2305@3.9479995	3	3	3.77142	2.40749	16.6418	15.6011	2.05732	2.05732	102256	49703.4	2.05732	102256	49703.4	2.05732	52552.5	15.6815
685.4948@13.395998	3	3	173.205	1.29777	13.2767	4.54395	425.433	425.433	9924.25	23.3274	425.433	9924.25	23.3274	425.433	9900.92	13.2733
290.1106@1.7560003	3	3	1.45474	1.25456	15.238	15.6343	-1.31609	1.31609	38645.5	50861	-1.31609	38645.5	50861	-1.31609	-12215.5	-13.5764
487.2267@2.9979997	3	3	2.07427	1.19225	15.2506	14.513	1.6674	1.6674	38984.6	23380.5	1.6674	38984.6	23380.5	1.6674	15604.1	13.9296
227.1271@3.0639997	3	3	1.05815	2.95614	15.3728	16.0092	-1.55447	1.55447	42430.1	65956.5	-1.55447	42430.1	65956.5	-1.55447	-23526.4	-14.522
417.1846@1.2069999	3	3	2.58424	1.09376	13.7	14.6106	-1.8798	1.8798	13308	25016.3	-1.8798	13308	25016.3	-1.8798	-11708.3	-13.5152
216.0885@4.2600007	3	3	0.73215	0.409	15.4937	15.7637	-1.20579	1.20579	46138.1	55633	-1.20579	46138.1	55633	-1.20579	-9494.94	-13.2129
1238.64@4.589	3	3	4.15971	4.75423	16.4077	14.4601	3.85727	3.85727	86935.4	22538.1	3.85727	86935.4	22538.1	3.85727	64397.3	15.9747
484.3018@7.0980005	3	3	2.47012	1.3752	15.6931	15.1882	1.41907	1.41907	52978.9	37333.6	1.41907	52978.9	37333.6	1.41907	15645.3	13.9334
905.6263@11.919	3	3	0.988879	0.279436	16.2897	16.5356	-1.18589	1.18589	80108.3	94999.7	-1.18589	80108.3	94999.7	-1.18589	-14891.4	-13.8622
473.1743@3.499	3	3	1.85424	0.446325	15.2544	14.7049	1.46355	1.46355	39086.6	26706.7	1.46355	39086.6	26706.7	1.46355	12380	13.5957
738.2915@3.0879998	3	3	4.00278	0.387219	15.1322	14.3245	1.75041	1.75041	35913.5	20517.2	1.75041	35913.5	20517.2	1.75041	15396.3	13.9103
119.0727@4.6699996	3	3	0.603989	1.33242	15.14	15.5551	-1.33342	1.33342	36107.5	48146.6	-1.33342	36107.5	48146.6	-1.33342	-12039	-13.5554
394.2708@7.491	3	3	3.14351	1.20813	15.2759	14.5887	1.61022	1.61022	39675.1	24639.6	1.61022	39675.1	24639.6	1.61022	15035.5	13.8761
683.2733@1.707	3	3	0.636466	2.00975	14.4574	15.0118	-1.46854	1.46854	22496.4	33036.9	-1.46854	22496.4	33036.9	-1.46854	-10540.5	-13.3637
476.226@4.7000003	3	3	1.25046	2.34682	15.3377	15.9855	-1.56675	1.56675	41410.1	64879.2	-1.56675	41410.1	64879.2	-1.56675	-23469.1	-14.5185
158.0258@1.0150001	3	3	0.499855	2.34947	15.4758	16.0388	-1.47735	1.47735	45569	67321.3	-1.47735	45569	67321.3	-1.47735	-21752.2	-14.4089
289.1301@5.4140005	3	3	3.57554	0.789887	15.1351	14.2621	1.83145	1.83145	35984.1	19647.9	1.83145	35984.1	19647.9	1.83145	16336.2	13.9958
419.0849@6.4919996	3	3	0.692637	1.1717	15.2639	14.9425	1.24949	1.24949	39344.8	31488.7	1.24949	39344.8	31488.7	1.24949	7856.14	12.9396
865.356@1.0410001	3	3	2.33868	3.15315	15.1849	14.3411	1.79482	1.79482	37249.5	20753.9	1.79482	37249.5	20753.9	1.79482	16495.6	14.0098
635.4585@15.108999	3	3	3.81955	1.00036	14.7448	15.532	-1.7258	1.7258	27454.7	47381.3	-1.7258	27454.7	47381.3	-1.7258	-19926.6	-14.2824
291.8374@1.0749999	3	3	0.107581	0.54064	16.0864	15.8714	1.16075	1.16075	69582.8	59946.5	1.16075	69582.8	59946.5	1.16075	9636.27	13.2343
314.2237@11.318	3	3	0.540483	3.20018	15.4806	14.4821	1.99787	1.99787	45721.5	22885.1	1.99787	45721.5	22885.1	1.99787	22836.3	14.479
453.2201@4.965	3	3	0.929563	0.0749802	15.7192	16.0107	-1.22395	1.22395	53943.5	66024.1	-1.22395	53943.5	66024.1	-1.22395	-12080.6	-13.5604
442.3072@10.995001	3	3	2.03534	2.33644	15.8963	14.8947	2.00222	2.00222	60992.5	30462.5	2.00222	60992.5	30462.5	2.00222	30530	14.8979
296.1005@3.348	3	3	1.60052	3.81116	14.4738	15.6918	-2.32626	2.32626	22754	52931.7	-2.32626	22754	52931.7	-2.32626	-30177.7	-14.8812
514.4008@14.886	3	3	2.53006	1.91097	16.3886	14.9589	2.69392	2.69392	85792.2	31846.6	2.69392	85792.2	31846.6	2.69392	53945.7	15.7192
151.0474@3.375	3	3	1.5303	0.972573	15.1629	14.4762	1.60959	1.60959	36683.9	22790.8	1.60959	36683.9	22790.8	1.60959	13893.1	13.7621
316.2103@3.205	3	3	27.413	4.06712	15.185	11.0886	17.1061	17.1061	37252.3	2177.73	17.1061	37252.3	2177.73	17.1061	35074.6	15.0981
389.1779@3.626	3	3	0.68608	2.02013	15.0786	15.5801	-1.41561	1.41561	34603.9	48985.7	-1.41561	34603.9	48985.7	-1.41561	-14381.9	-13.812
425.1891@3.638	3	3	0.318228	0.969218	15.2195	15.488	-1.2046	1.2046	38151.8	45957.8	-1.2046	38151.8	45957.8	-1.2046	-7806.02	-12.9304
582.2464@7.4310007	3	3	2.14285	1.49282	15.1901	14.2548	1.91229	1.91229	37383	19548.8	1.91229	37383	19548.8	1.91229	17834.1	14.1224
448.1101@5.9080005	3	3	4.71052	0.68815	14.5006	13.5753	1.89907	1.89907	23180.4	12206.2	1.89907	23180.4	12206.2	1.89907	10974.2	13.4218
616.3968@6.8599997	3	3	1.32037	0.867259	15.3683	15.8382	-1.38502	1.38502	42297.4	58582.9	-1.38502	42297.4	58582.9	-1.38502	-16285.5	-13.9913
467.1865@3.5219998	3	3	5.38319	0.874825	15.5799	16.7511	-2.25186	2.25186	48981.2	110299	-2.25186	48981.2	110299	-2.25186	-61317.6	-15.904
684.4586@10.352999:1	3	3	5.25437	2.24937	15.6517	14.6115	2.05656	2.05656	51479.3	25031.7	2.05656	51479.3	25031.7	2.05656	26447.6	14.6908
273.1355@5.9690003	3	3	1.69904	1.8915	14.7861	14.2857	1.41454	1.41454	28251.8	19972.5	1.41454	28251.8	19972.5	1.41454	8279.31	13.0153
476.312@5.9570003	3	3	2.08566	0.663061	15.7207	15.3094	1.32991	1.32991	54001.5	40605.3	1.32991	54001.5	40605.3	1.32991	13396.2	13.7095
343.2096@4.5579996	3	3	0.626224	11.0245	13.9517	15.831	-3.67897	3.67897	15844.6	58292	-3.67897	15844.6	58292	-3.67897	-42447.3	-15.3734
151.0625@5.4220004	3	3	1.06277	1.62309	14.974	15.8076	-1.78216	1.78216	32182	57353.3	-1.78216	32182	57353.3	-1.78216	-25171.3	-14.6195
315.1787@3.6770005	3	3	1.99261	2.75938	14.2987	15.0117	-1.63922	1.63922	20153.1	33035.3	-1.63922	20153.1	33035.3	-1.63922	-12882.2	-13.6531
528.4169@13.307001	3	3	3.53417	1.77096	15.9223	14.8211	2.14545	2.14545	62101.2	28945.6	2.14545	62101.2	28945.6	2.14545	33155.6	15.017
956.5562@8.058	3	3	3.02674	4.58765	14.2589	16.048	-3.45606	3.45606	19604.1	67753.1	-3.45606	19604.1	67753.1	-3.45606	-48148.9	-15.5552
340.1987@7.1330004	3	3	0.669272	2.95024	15.4896	14.6557	1.78255	1.78255	46009.1	25810.8	1.78255	46009.1	25810.8	1.78255	20198.3	14.3019
188.0826@5.3349996	3	3	0.570183	1.84386	15.2626	15.6158	-1.27744	1.27744	39309.3	50215.5	-1.27744	39309.3	50215.5	-1.27744	-10906.2	-13.4129
619.2477@3.1819997	3	3	1.23088	0.250126	14.4367	15.1613	-1.65243	1.65243	22175.4	36643.3	-1.65243	22175.4	36643.3	-1.65243	-14468	-13.8206
127.0992@4.1839995	3	3	1.13855	3.24064	14.8215	15.5198	-1.62265	1.62265	28953.6	46981.4	-1.62265	28953.6	46981.4	-1.62265	-18027.9	-14.1379
652.2826@5.2929997	3	3	4.70222	2.33568	16.0816	14.8711	2.31423	2.31423	69349.7	29966.6	2.31423	69349.7	29966.6	2.31423	39383.1	15.2653
272.2131@12.941	3	3	1.48596	4.29329	15.5955	14.6887	1.87495	1.87495	49512.8	26407.5	1.87495	49512.8	26407.5	1.87495	23105.3	14.4959
160.0879@4.327	3	3	2.73907	6.10295	14.0933	15.4278	-2.52184	2.52184	17478.6	44078.2	-2.52184	17478.6	44078.2	-2.52184	-26599.6	-14.6991
402.2248@11.372001	3	3	1.40289	1.041	15.4017	15.7385	-1.26294	1.26294	43287.6	54669.6	-1.26294	43287.6	54669.6	-1.26294	-11382	-13.4745
720.4939@7.352	3	3	0.986084	1.21217	15.9573	15.5019	1.37112	1.37112	63623.2	46402.3	1.37112	63623.2	46402.3	1.37112	17220.8	14.0719
535.2443@3.494	3	3	1.13802	2.74118	14.8848	15.746	-1.81653	1.81653	30252.5	54954.6	-1.81653	30252.5	54954.6	-1.81653	-24702.1	-14.5923
582.2272@3.5729995	3	3	2.95476	3.29958	15.4285	14.5719	1.81082	1.81082	44101.4	24354.4	1.81082	44101.4	24354.4	1.81082	19747	14.2693
732.3857@4.0740004	3	3	1.16897	1.99079	15.3019	14.7938	1.42217	1.42217	40394.7	28403.6	1.42217	40394.7	28403.6	1.42217	11991.2	13.5497
421.0987@1.158	3	3	1.9813	1.63025	15.7317	15.2396	1.40645	1.40645	54414.2	38689	1.40645	54414.2	38689	1.40645	15725.2	13.9408
560.406@8.847	3	3	4.5516	1.24119	14.9717	14.0454	1.9004	1.9004	32132.3	16908.2	1.9004	32132.3	16908.2	1.9004	15224.1	13.8941
333.1163@1.5810001	3	3	4.45561	7.76669	13.1527	14.6446	-2.81256	2.81256	9106.71	25613.2	-2.81256	9106.71	25613.2	-2.81256	-16506.5	-14.0107
317.1946@1.757	3	3	1.27176	0.794834	14.8236	15.5379	-1.64076	1.64076	28996.4	47576.1	-1.64076	28996.4	47576.1	-1.64076	-18579.7	-14.1814
388.1956@3.7850003	3	3	4.20693	0.421242	15.2887	14.5557	1.66207	1.66207	40026.3	24082.2	1.66207	40026.3	24082.2	1.66207	15944.1	13.9607
354.2765@12.817999	3	3		7.47034	11.9276	0	3895.53	3895.53	3895.53	1	3895.53	3895.53	1	3895.53	3894.53	11.9272
196.0846@3.514	3	3	0.768569	1.4769	14.9729	15.5022	-1.4432	1.4432	32158.8	46411.8	-1.4432	32158.8	46411.8	-1.4432	-14253	-13.799
225.1297@3.9059997	3	3	3.19715	173.205	4.34453	13.6205	-619.926	619.926	20.3158	12594.3	-619.926	20.3158	12594.3	-619.926	-12574	-13.6182
586.2722@3.5660005	3	3	3.58656	2.27345	16.2028	15.0528	2.21912	2.21912	75427.7	33990	2.21912	75427.7	33990	2.21912	41437.7	15.3387
444.1506@6.0019994	3	3	3.24832	3.05373	14.6397	15.416	-1.71274	1.71274	25526.5	43720.2	-1.71274	25526.5	43720.2	-1.71274	-18193.7	-14.1512
724.4889@8.701001	3	3	3.32521	1.99867	15.9686	14.7947	2.25628	2.25628	64125.5	28420.9	2.25628	64125.5	28420.9	2.25628	35704.6	15.1238
333.2261@1.2200001	3	3	173.205	5.55912	14.6753	4.9733	832.914	832.914	26164.5	31.4131	832.915	26164.5	31.4131	832.915	26133	14.6736
579.2627@3.1930003	3	3	1.84724	0.884362	15.0701	14.6601	1.32874	1.32874	34400.1	25889.4	1.32874	34400.1	25889.4	1.32874	8510.76	13.0551
353.1369@7.547	3	3	1.87456	2.687	15.634	14.4759	2.23165	2.23165	50850.2	22786	2.23165	50850.2	22786	2.23165	28064.2	14.7764
216.1466@4.1650004	3	3	5.32668	2.52941	14.338	13.3426	1.99354	1.99354	20709.2	10388.1	1.99354	20709.2	10388.1	1.99354	10321	13.3333
313.1632@3.473	3	3	0.454932	1.13726	14.7945	15.384	-1.50481	1.50481	28416.8	42761.9	-1.50481	28416.8	42761.9	-1.50481	-14345	-13.8083
222.0885@4.2900004	3	3	2.63314	1.90383	14.4695	15.5258	-2.07963	2.07963	22686	47178.5	-2.07963	22686	47178.5	-2.07963	-24492.5	-14.58
128.0925@4.3040004	3	3	0.424503	0.289307	14.828	15.1164	-1.22125	1.22125	29086.1	35521.4	-1.22125	29086.1	35521.4	-1.22125	-6435.36	-12.6518
195.0572@3.7029996	3	3	0.870699	1.14599	15.0296	15.4575	-1.34528	1.34528	33447.5	44996.3	-1.34528	33447.5	44996.3	-1.34528	-11548.8	-13.4954
156.0102@1.0109999	3	3	0.636138	1.65609	15.2572	15.8104	-1.46732	1.46732	39162.3	57463.6	-1.46732	39162.3	57463.6	-1.46732	-18301.3	-14.1597
274.1154@3.775	3	3	1.09527	3.73721	14.3601	15.0435	-1.60594	1.60594	21029	33771.3	-1.60594	21029	33771.3	-1.60594	-12742.3	-13.6373
259.1198@5.61	3	3	0.823376	3.41393	15.0189	14.2845	1.66376	1.66376	33200.5	19955.1	1.66376	33200.5	19955.1	1.66376	13245.4	13.6932
186.1006@1.0130001	3	3	4.23336	2.25002	13.7729	12.7902	1.97616	1.97616	13997.2	7083.06	1.97616	13997.2	7083.06	1.97616	6914.16	12.7553
823.5429@10.753999	3	3	4.15816	5.09286	15.6367	14.0209	3.06478	3.06478	50945.3	16622.8	3.06478	50945.3	16622.8	3.06478	34322.5	15.0669
406.9885@1.1070001	3	3	1.16536	2.45734	15.2675	16.0249	-1.69051	1.69051	39443.1	66678.8	-1.69051	39443.1	66678.8	-1.69051	-27235.7	-14.7332
115.0628@5.855	3	3	0.37132	0.548436	15.5681	15.1192	1.36506	1.36506	48581.5	35589.2	1.36506	48581.5	35589.2	1.36506	12992.3	13.6654
362.1423@4.7169995	3	3	0.826457	7.68066	14.2507	15.499	-2.37565	2.37565	19493.2	46309	-2.37565	19493.2	46309	-2.37565	-26815.8	-14.7108
426.1484@3.9690003	3	3	0.45776	8.36913	13.4798	15.6485	-4.49617	4.49617	11424	51364.2	-4.49617	11424	51364.2	-4.49617	-39940.2	-15.2856
460.3171@5.6619997	3	3	1.10892	1.9284	16.1253	15.3499	1.7116	1.7116	71482.2	41763.3	1.7116	71482.2	41763.3	1.7116	29718.9	14.8591
468.1727@4.493	3	3	2.59024	2.00128	15.5008	14.1786	2.50043	2.50043	46366.3	18543.4	2.50043	46366.3	18543.4	2.50043	27823	14.764
210.1357@4.5159993	3	3	0.252678	1.94973	14.8925	15.3932	-1.41492	1.41492	30415	43034.9	-1.41492	30415	43034.9	-1.41492	-12619.9	-13.6234
352.0428@1.104	3	3	0.649422	0.771847	15.9136	15.5571	1.28029	1.28029	61724.8	48211.4	1.28029	61724.8	48211.4	1.28029	13513.4	13.7221
196.1204@3.521	3	3	0.642338	0.864936	15.0532	15.3475	-1.22631	1.22631	33997.8	41691.9	-1.22631	33997.8	41691.9	-1.22631	-7694.03	-12.9095
140.0465@4.077	3	3	1.87553	3.52358	14.4771	15.4979	-2.02899	2.02899	22805.5	46272	-2.02899	22805.5	46272	-2.02899	-23466.6	-14.5183
537.1846@1.031	3	3	2.81376	4.22131	13.9388	13.1666	1.70787	1.70787	15703.2	9194.6	1.70787	15703.2	9194.6	1.70787	6508.62	12.6681
422.349@11.432	3	3	3.90129	4.45344	15.7799	14.7739	2.00837	2.00837	56264.6	28015	2.00837	56264.6	28015	2.00837	28249.6	14.7859
452.1589@8.154	3	3	0.572636	0.753495	15.8492	15.506	1.26863	1.26863	59032.6	46532.7	1.26863	59032.6	46532.7	1.26863	12499.9	13.6096
405.3452@7.0530005	3	3	1.34264	13.4508	13.5751	15.7401	-4.48464	4.48464	12204.3	54732.1	-4.48464	12204.3	54732.1	-4.48464	-42527.8	-15.3761
158.1087@5.326	3	3	1.09964	2.21983	14.8462	15.2961	-1.36589	1.36589	29454.6	40231.9	-1.36589	29454.6	40231.9	-1.36589	-10777.3	-13.3957
749.2213@3.18	3	3	2.21037	1.79523	14.6016	15.5024	-1.86707	1.86707	24861.4	46418	-1.86707	24861.4	46418	-1.86707	-21556.6	-14.3958
624.474@13.309999	3	3	4.86605	3.03809	15.6195	14.0216	3.02708	3.02708	50342.2	16630.6	3.02708	50342.2	16630.6	3.02708	33711.6	15.041
767.234@1.2279999	3	3	2.34656	1.00369	16.3165	15.3448	1.96115	1.96115	81614.8	41615.7	1.96115	81614.8	41615.7	1.96115	39999.1	15.2877
199.1318@1.6140001	3	3	2.22604	0.77776	14.3678	14.7724	-1.3237	1.3237	21141.5	27984.9	-1.3237	21141.5	27984.9	-1.3237	-6843.46	-12.7405
433.1143@1.6200001	3	3	2.20991	0.918011	15.0479	14.2949	1.68537	1.68537	33875	20099.4	1.68537	33875	20099.4	1.68537	13775.6	13.7498
289.1303@6.557	3	3	1.01644	0.483642	15.1647	14.7252	1.35616	1.35616	36730.6	27084.2	1.35616	36730.6	27084.2	1.35616	9646.4	13.2358
165.0779@4.6630006	3	3	0.358771	2.56983	14.7763	15.2274	-1.36709	1.36709	28061.9	38363.2	-1.36709	28061.9	38363.2	-1.36709	-10301.3	-13.3305
1186.6721@4.0019994	3	3	3.15639	0.518524	15.2828	14.6766	1.52222	1.52222	39863.3	26187.6	1.52222	39863.3	26187.6	1.52222	13675.7	13.7393
636.2608@1.3900001	3	3	0.995032	4.11715	15.0157	14.0882	1.90193	1.90193	33125.4	17416.8	1.90193	33125.4	17416.8	1.90193	15708.7	13.9393
542.1739@1.1660001	3	3	4.39801	2.30638	14.7358	13.001	3.3282	3.3282	27284.2	8197.89	3.3282	27284.2	8197.89	3.3282	19086.3	14.2203
522.2239@7.979001	3	3	1.86798	1.90737	14.3954	15.666	-2.41256	2.41256	21549.8	51990.3	-2.41256	21549.8	51990.3	-2.41256	-30440.5	-14.8937
285.1684@3.3919997	3	3	0.890746	6.14464	13.9611	15.3115	-2.5498	2.5498	15948.5	40665.6	-2.5498	15948.5	40665.6	-2.5498	-24717	-14.5932
414.2454@4.201	3	3	3.42823	2.78954	13.6948	15.0255	-2.51516	2.51516	13260.4	33352	-2.51516	13260.4	33352	-2.51516	-20091.6	-14.2943
160.0881@6.006	3	3	1.48621	2.92073	14.4028	15.1963	-1.73322	1.73322	21661	37543.2	-1.73322	21661	37543.2	-1.73322	-15882.2	-13.9551
389.9037@1.092	3	3	1.1092	2.41315	15.0166	15.6326	-1.53269	1.53269	33146.3	50802.8	-1.53269	33146.3	50802.8	-1.53269	-17656.5	-14.1079
882.6031@7.9380007	3	3	15.6463	4.8605	14.2912	11.5966	6.47373	6.47373	20048	3096.82	6.47373	20048	3096.82	6.47373	16951.1	14.0491
912.4819@10.846	3	3	1.07393	7.05341	14.1409	15.9851	-3.59054	3.59054	18064.3	64860.6	-3.59054	18064.3	64860.6	-3.59054	-46796.3	-15.5141
846.4409@11.972	3	3	3.98601	4.74116	16.1771	17.3496	-2.25393	2.25393	74097.5	167010	-2.25393	74097.5	167010	-2.25393	-92912.9	-16.5036
929.6897@13.629999	3	3	3.62042	2.0045	15.7027	14.9768	1.65392	1.65392	53331.4	32245.4	1.65392	53331.4	32245.4	1.65392	21086	14.364
132.0934@5.8110003	3	3	2.14456	3.01234	14.3769	15.2103	-1.78193	1.78193	21274.9	37910.4	-1.78193	21274.9	37910.4	-1.78193	-16635.5	-14.022
575.1498@1.0559999	3	3	1.52763	6.20551	14.4329	13.4204	2.01746	2.01746	22117.6	10963.1	2.01746	22117.6	10963.1	2.01746	11154.5	13.4453
134.0364@3.6889997	3	3	1.69115	1.94993	14.6916	15.4169	-1.65326	1.65326	26461.2	43747.3	-1.65326	26461.2	43747.3	-1.65326	-17286	-14.0773
871.7711@14.122	3	3	10.6351	1.02947	15.0321	12.6284	5.2915	5.2915	33504.9	6331.83	5.2915	33504.9	6331.83	5.2915	27173.1	14.7299
368.0733@1.1900002	3	3	0.708681	1.16257	15.1335	13.7402	2.62677	2.62677	35943.7	13683.6	2.62677	35943.7	13683.6	2.62677	22260.1	14.4422
327.3128@13.817999	3	3	2.43173	1.73157	14.3036	13.6377	1.5866	1.5866	20221.3	12745.1	1.5866	20221.3	12745.1	1.5866	7476.25	12.8681
582.2459@7.432	3	3	0.22886	1.61563	15.1871	14.4752	1.6379	1.6379	37304.4	22775.7	1.6379	37304.4	22775.7	1.6379	14528.7	13.8266
190.0584@4.006	3	3	0.903536	5.25845	14.402	15.3224	-1.89275	1.89275	21648.3	40974.8	-1.89275	21648.3	40974.8	-1.89275	-19326.5	-14.2383
161.0143@3.6010003	3	3	0.884203	2.03629	14.6434	15.5488	-1.87308	1.87308	25592.5	47936.7	-1.87308	25592.5	47936.7	-1.87308	-22344.2	-14.4476
388.1249@1.061	3	3	0.411262	1.65381	14.8641	14.4058	1.37394	1.37394	29822.7	21706.1	1.37394	29822.7	21706.1	1.37394	8116.68	12.9867
362.2411@3.251	3	3		86.8932	8.3596	0	328.465	328.465	328.465	1	328.465	328.465	1	328.465	327.465	8.3552
602.4805@4.5800004	3	3	2.45735	4.1092	15.0442	13.7389	2.47134	2.47134	33787.4	13671.7	2.47134	33787.4	13671.7	2.47134	20115.7	14.296
546.4261@13.306	3	3	4.97999	1.84688	15.6029	14.2428	2.56703	2.56703	49768.3	19387.5	2.56703	49768.3	19387.5	2.56703	30380.8	14.8909
624.473@13.459	3	3	2.59926	2.90079	15.2386	14.0249	2.31928	2.31928	38660.6	16669.2	2.31928	38660.6	16669.2	2.31928	21991.4	14.4247
714.5251@9.197999	3	3	1.09464	3.72117	14.6036	15.3214	-1.64463	1.64463	24896.3	40945.1	-1.64463	24896.3	40945.1	-1.64463	-16048.8	-13.9702
573.2013@1.6159999	3	3	0.73572	2.00791	14.8846	14.4842	1.3199	1.3199	30249.2	22917.8	1.3199	30249.2	22917.8	1.3199	7331.34	12.8399
636.255@4.589	3	3	5.57459	2.2788	15.607	14.2588	2.54598	2.54598	49910	19603.4	2.54598	49910	19603.4	2.54598	30306.5	14.8873
921.336@3.8279996	3	3	2.9494	8.79841	13.8606	15.6582	-3.47634	3.47634	14874.8	51710	-3.47634	14874.8	51710	-3.47634	-36835.1	-15.1688
462.3331@12.566001	3	3		86.682	9.27002	0	617.38	617.38	617.38	1	617.38	617.38	1	617.38	616.38	9.26768
642.3541@4.757	3	3	3.05725	6.21721	15.4875	14.1361	2.55163	2.55163	45942.2	18005.1	2.55163	45942.2	18005.1	2.55163	27937.1	14.7699
244.1087@5.2929997	3	3	3.95135	3.90598	14.7512	15.9302	-2.26417	2.26417	27576.9	62438.9	-2.26417	27576.9	62438.9	-2.26417	-34862	-15.0894
271.0688@3.5569997	3	3	1.35043	1.23672	15.2853	14.6098	1.59715	1.59715	39933.8	25003.2	1.59715	39933.8	25003.2	1.59715	14930.6	13.866
365.1685@3.5849996	3	3	0.641365	0.459545	15.0888	14.6928	1.31587	1.31587	34848.4	26483.1	1.31587	34848.4	26483.1	1.31587	8365.34	13.0302
232.1801@6.9070005	3	3	2.87992	4.75638	14.972	13.6453	2.50826	2.50826	32137.9	12812.8	2.50826	32137.9	12812.8	2.50826	19325.1	14.2382
733.5106@11.035001	3	3	173.205	3.74994	12.172	4.21115	249.153	249.153	4614.75	18.5218	249.153	4614.75	18.5218	249.153	4596.23	12.1662
364.2312@1.554	3	3	1.08237	1.18267	15.017	15.3955	-1.29991	1.29991	33157.3	43101.5	-1.29991	33157.3	43101.5	-1.29991	-9944.2	-13.2796
464.0328@1.123	3	3	1.84479	2.30822	15.6493	14.7541	1.85993	1.85993	51394.8	27632.7	1.85993	51394.8	27632.7	1.85993	23762.1	14.5364
194.9702@1.094	3	3	2.97377	4.05156	15.1202	13.9985	2.17604	2.17604	35615.3	16367	2.17604	35615.3	16367	2.17604	19248.3	14.2324
272.1365@3.2400002	3	3	1.82876	8.81196	13.8396	15.4685	-3.09271	3.09271	14660.3	45340	-3.09271	14660.3	45340	-3.09271	-30679.8	-14.905
312.1928@6.048	3	3	1.74006	0.672356	14.9232	14.4384	1.3994	1.3994	31069.6	22202.1	1.3994	31069.6	22202.1	1.3994	8867.47	13.1143
503.3811@15.313002	3	3	3.20997	3.21983	13.9468	14.7323	-1.72375	1.72375	15790.6	27219.1	-1.72375	15790.6	27219.1	-1.72375	-11428.5	-13.4803
245.1618@5.8440003	3	3	0.588171	1.02477	15.2985	14.6904	1.52429	1.52429	40300.8	26439.1	1.52429	40300.8	26439.1	1.52429	13861.7	13.7588
276.2448@7.708	3	3	3.80782	1.52448	15.2642	14.5619	1.62716	1.62716	39354.5	24186	1.62716	39354.5	24186	1.62716	15168.4	13.8888
199.132@3.355	3	3	1.25503	3.80362	14.1368	15.4226	-2.43817	2.43817	18013.5	43920.1	-2.43817	18013.5	43920.1	-2.43817	-25906.5	-14.661
584.3103@4.0	3	3	3.19855	6.842	13.6807	14.8757	-2.28943	2.28943	13130.9	30062.2	-2.28943	13130.9	30062.2	-2.28943	-16931.3	-14.0474
812.2317@3.1499999	3	3	0.476681	3.65829	15.1212	15.8313	-1.63592	1.63592	35641	58305.7	-1.63592	35641	58305.7	-1.63592	-22664.7	-14.4682
258.1579@1.74	3	3	0.72366	1.38848	15.214	15.6134	-1.31901	1.31901	38006.9	50131.5	-1.31901	38006.9	50131.5	-1.31901	-12124.6	-13.5656
542.3823@12.683999	3	3	3.63109	19.4511	16.369	12.5926	13.7028	13.7028	84639.5	6176.8	13.7028	84639.5	6176.8	13.7028	78462.7	16.2597
749.2195@3.534	3	3	1.52479	0.174756	15.5864	15.2587	1.25493	1.25493	49199.4	39204.9	1.25493	49199.4	39204.9	1.25493	9994.52	13.2869
500.3128@7.099	3	3	4.61426	2.28136	15.4797	14.6152	1.82071	1.82071	45694	25096.7	1.82071	45694	25096.7	1.82071	20597.2	14.3302
1046.7133@12.684999	3	3	6.24768	2.65948	15.5807	13.9658	3.0629	3.0629	49005.6	15999.7	3.0629	49005.6	15999.7	3.0629	33005.9	15.0104
188.1559@5.8079996	3	3	2.08697	2.20327	14.4535	15.0647	-1.5275	1.5275	22436.1	34271.2	-1.5275	22436.1	34271.2	-1.5275	-11835.1	-13.5308
325.0294@3.7739997	3	3	0.801113	0.898697	15.2389	14.9205	1.24696	1.24696	38669.9	31011.3	1.24696	38669.9	31011.3	1.24696	7658.56	12.9029
248.1405@6.762	3	3	173.205	11.6734	14.2334	4.57448	808.369	808.369	19260.4	23.8263	808.369	19260.4	23.8263	808.369	19236.6	14.2316
388.2535@4.1839995	3	3	3.01337	3.20024	13.1429	14.3886	-2.37126	2.37126	9045.01	21448.1	-2.37126	9045.01	21448.1	-2.37126	-12403.1	-13.5984
305.9423@1.09	3	3	0.737985	2.32222	14.8001	15.3556	-1.46974	1.46974	28527.2	41927.5	-1.46974	28527.2	41927.5	-1.46974	-13400.3	-13.71
161.0691@1.0229999	3	3	1.57598	3.16244	14.7417	13.7356	2.00858	2.00858	27397.3	13640.1	2.00858	27397.3	13640.1	2.00858	13757.2	13.7479
649.2734@6.3429995	3	3	3.13071	9.80206	13.9085	15.7207	-3.51187	3.51187	15377.1	54002.5	-3.51187	15377.1	54002.5	-3.51187	-38625.3	-15.2373
206.0074@1.097	3	3	0.123844	3.12804	14.8497	15.4003	-1.46469	1.46469	29526.1	43246.5	-1.46469	29526.1	43246.5	-1.46469	-13720.4	-13.744
195.0524@4.187	3	3	2.10791	1.62678	14.6318	15.1793	-1.46154	1.46154	25387.6	37104.9	-1.46154	25387.6	37104.9	-1.46154	-11717.3	-13.5164
805.5332@7.645999	3	3	173.205	10.3554	14.7435	4.18214	1511.09	1511.09	27430.9	18.153	1511.09	27430.9	18.153	1511.09	27412.8	14.7426
1303.2269@1.2469999	3	3	1.74035	1.55208	15.8325	16.4074	-1.4896	1.4896	58350.7	86919.1	-1.4896	58350.7	86919.1	-1.4896	-28568.4	-14.8021
287.2454@7.148	3	3	1.46656	1.8715	14.7993	15.5347	-1.66484	1.66484	28512.6	47468.9	-1.66484	28512.6	47468.9	-1.66484	-18956.2	-14.2104
1174.5201@7.0929995	3	3	3.12371	0.590864	15.9858	15.4016	1.49924	1.49924	64894.3	43284.9	1.49924	64894.3	43284.9	1.49924	21609.4	14.3994
290.1473@1.3789998	3	3	2.69182	6.36459	15.9999	13.8608	4.40466	4.40466	65530.3	14877.5	4.40466	65530.3	14877.5	4.40466	50652.8	15.6284
375.1886@3.758	3	3	0.626814	0.570812	14.5205	14.9825	-1.37748	1.37748	23501.7	32373.1	-1.37748	23501.7	32373.1	-1.37748	-8871.33	-13.1149
351.1176@5.105	3	3	2.23426	0.537142	14.3995	14.9298	-1.44421	1.44421	21611.5	31211.4	-1.44421	21611.5	31211.4	-1.44421	-9599.94	-13.2288
246.1248@6.7249994	3	3	0.669191	4.91846	14.6215	13.6778	1.92354	1.92354	25206.9	13104.4	1.92354	25206.9	13104.4	1.92354	12102.5	13.563
155.0036@3.7389998	3	3	1.32425	1.5659	14.6018	15.3689	-1.70183	1.70183	24865.2	42316.5	-1.70183	24865.2	42316.5	-1.70183	-17451.2	-14.091
525.7486@1.0769999	3	3	0.714472	0.692005	15.3193	15.0835	1.17753	1.17753	40884.3	34720.3	1.17753	40884.3	34720.3	1.17753	6164.02	12.5897
218.13@6.7209997	3	3	6.60631	5.28548	14.7692	13.1295	3.11609	3.11609	27924	8961.23	3.11609	27924	8961.23	3.11609	18962.8	14.2109
304.2033@10.173001	3	3	2.76442	5.68637	15.7895	14.6444	2.21162	2.21162	56637.4	25609	2.21162	56637.4	25609	2.21162	31028.4	14.9213
182.1048@3.4520001	3	3	1.42751	1.45847	14.4741	15.0436	-1.48401	1.48401	22758.7	33774.1	-1.48401	22758.7	33774.1	-1.48401	-11015.5	-13.4272
208.1447@4.1969995	3	3	2.54886	173.205	5.05818	15.0054	-987.204	987.204	33.3168	32890.5	-987.204	33.3168	32890.5	-987.204	-32857.2	-15.0039
334.1769@5.875	3	3	2.39287	1.90134	12.9319	14.5816	-3.13769	3.13769	7814.12	24518.3	-3.13769	7814.12	24518.3	-3.13769	-16704.2	-14.0279
214.0986@6.0709996	3	3	3.50155	2.67628	13.4563	14.4751	-2.02621	2.02621	11239.3	22773.3	-2.02621	11239.3	22773.3	-2.02621	-11533.9	-13.4936
[truncated: 214 more rows]

## Sheet: Streptomyces albus
Compound Mass@Retention Time	[152](3)	[PQQ](3)	[152] (RSD)	[PQQ] (RSD)	[PQQ] avg : Normalized	[152] avg : Normalized	Signed FC (abs) ([PQQ] vs [152]) : Normalized	FC (abs) ([PQQ] vs [152]) : Normalized	[PQQ] avg : Raw	[152] avg : Raw	Signed FC (abs) ([PQQ] vs [152]) : Raw	[PQQ] avg : Raw Scaled	[152] avg : Raw Scaled	Signed FC (abs) ([PQQ] vs [152]) : Raw Scaled	Abund Diff (Raw) ([PQQ] - [152])	Abund Diff (Log2) ([PQQ] - [152])
[truncated: 7,583 more rows]

[truncated: 8 more sheets: Streptomyces griesus, Streptomyces cinnamonensis, Streptomyces sp.NP10, Streptomyces venezulae, Streptomyces clavuligerus, Streptomyces noursei, Streptomyces rapamycinicus, Streptomyces cattleya]
